# Supplementary material for: Regiodivergent hydrosilylation in the nickel(0)-catalyzed cyclization of 1,6-enynes
Source: Royal Society of Chemistry journal article supplement (doi:10.1039/d2qo01266a), 2022-01-01

## *Supporting Information*

### **Regiodivergent Hydrosilylation in Nickel(0)-Catalyzed Cyclization of 1,6-Enynes**

Dachang Bai,<sup>\*1,2</sup> Ruoshi Cheng,<sup>1</sup> Jiaxin Yang,<sup>1</sup> Wenjie Xu,<sup>1</sup> Xingge Chen,<sup>1</sup> Junbiao Chang<sup>\*1</sup>

<sup>1</sup> NMPA Key Laboratory for Research and Evaluation of Innovative Drug, Collaborative Innovation Center of Henan Province for Green Manufacturing of Fine Chemicals, Key Laboratory of Green Chemical Media and Reactions, Ministry of Education, School of Chemistry and Chemical Engineering, Henan Normal University, Xinxiang 453007, China;

<sup>2</sup> State Key Laboratory of Organometallic Chemistry, Shanghai Institute of Organic Chemistry, Chinese Academy of Sciences, Shanghai 200032, P R China

\*Correspondence to [baidachang@htu.edu.cn](mailto:baidachang@htu.edu.cn); [changjunbiao@zzu.edu.cn](mailto:changjunbiao@zzu.edu.cn)

## Table of Contents

|                                                 |          |
|-------------------------------------------------|----------|
| 1. General Information .....                    | S3-4     |
| 2. Optimization of reaction conditions .....    | S4-S5    |
| 3. General procedure and Characterization ..... | S5-S29   |
| 4. Large-scale Synthesis .....                  | S30      |
| 5. Derivatization Reactions .....               | S31-S33  |
| 6. Mechanistic Studies.....                     | S33-S40  |
| 7. X-ray Crystallographic Data .....            | S41      |
| 8. References.....                              | S42      |
| 9. NMR Spectra.....                             | S43-S170 |

## 1. General Information

All chemicals were obtained from commercial sources and were used as received unless otherwise noted. All the reactions were carried out in an argon-filled glove box. The  $^1\text{H}$  NMR spectra were recorded on a 400 MHz or 600 MHz NMR spectrometer. The  $^{13}\text{C}$  NMR spectra were recorded at 100 MHz or 150 MHz. The  $^{19}\text{F}$  NMR spectra were recorded at 565 MHz. Chemical shifts were expressed in parts per million( $\delta$ ) downfield from the internal standard tetramethylsilane, and were reported as s (singlet), d (doublet), t (triplet), dd (doublet of doublet), dt (doublet of triplet), m (multiplet), brs (broad singlet), etc. The residual solvent signals were used as references and the chemical shifts were converted to the TMS scale. High resolution mass spectra were obtained on an Agilent Q-TOF 6540 spectrometer. Column chromatography was performed on silica gel (300-400 mesh). Thin layer chromatography was performed on pre-coated glass backed plates and visualized under UV light at 254 nm. Flash column chromatography was performed on silica gel. Diphenylsilane were purchased from commercial sources. 1,6-enyne were prepared according to literature reports.<sup>[1]</sup>

## 2. Hydrosilylation/cyclization of 1,6-enynes

### 2.1 Table S1. The hydrosilylation/cyclization of **1a** and **2a**.<sup>[a]</sup>

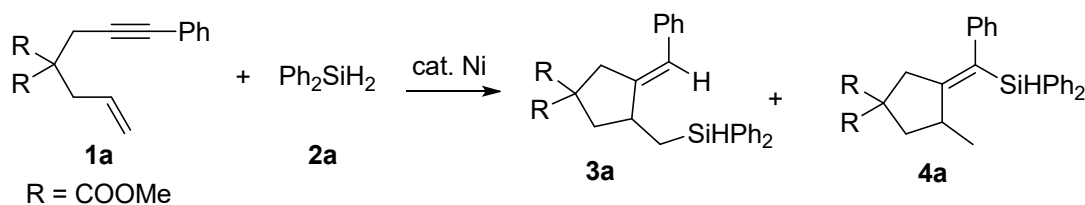

| Entry           | L                      | <b>2a</b> | Base (20 mol%) | Solvent             | T (°C) | Yield (%)<br><b>3a</b> | Yield (%)<br><b>4a</b> |
|-----------------|------------------------|-----------|----------------|---------------------|--------|------------------------|------------------------|
| 1               | --                     | 2eq       | --             | DMA                 | 30     | NR                     | --                     |
| 2               | --                     | 2eq       | --             | THF                 | 30     | 38%                    | --                     |
| 3               | --                     | 2eq       | --             | CH <sub>3</sub> CN  | 30     | 40%                    | --                     |
| 4               | --                     | 2eq       | --             | Dioxane             | 30     | 48%                    | --                     |
| 5               | --                     | 2eq       | --             | MeO <sup>t</sup> Bu | 30     | 46%                    | --                     |
| 6               | --                     | 2eq       | --             | EtOH                | 30     | 50%                    | --                     |
| 7               | --                     | 2eq       | --             | DME                 | 30     | 74%                    | --                     |
| 8               | --                     | 2eq       | --             | DME                 | 50     | 76%                    | --                     |
| 9               | --                     | 2eq       | --             | DME                 | 80     | 80%                    | --                     |
| 10              | --                     | 2eq       | --             | DME                 | 120    | 80%                    | --                     |
| 11              | --                     | 1eq       | --             | DME                 | 120    | 48%                    | --                     |
| 12 <sup>b</sup> | BINAP(10%)             | 2eq       | --             | THF                 | 30     | 28%                    | --                     |
| 13 <sup>b</sup> | BINAP(20%)             | 2eq       | --             | THF                 | 30     | 33%                    | --                     |
| 14 <sup>b</sup> | BPY(10%)               | 2eq       | --             | THF                 | 30     | trace                  | trace                  |
| 15 <sup>b</sup> | PPh <sub>3</sub> (10%) | 2eq       | --             | THF                 | 30     | --                     | --                     |

|                 |                        |     |                                |                    |     |       |       |
|-----------------|------------------------|-----|--------------------------------|--------------------|-----|-------|-------|
| 16 <sup>b</sup> | PCy <sub>3</sub> (10%) | 2eq | --                             | THF                | 30  | 36%   | 30%   |
| 17 <sup>b</sup> | PCy <sub>3</sub> (20%) | 2eq | --                             | THF                | 30  | 14%   | 32%   |
| 18 <sup>b</sup> | L1(10%)                | 2eq | CsOAc                          | THF                | 30  | --    | 66%   |
| 19 <sup>b</sup> | L1(20%)                | 2eq | CsOAc                          | THF                | 30  | --    | 62%   |
| 20 <sup>b</sup> | L2(10%)                | 2eq | CsOAc                          | THF                | 30  | 4%    | 32%   |
| 21 <sup>b</sup> | L3(10%)                | 2eq | CsOAc                          | THF                | 30  | 7%    | 33%   |
| 22 <sup>b</sup> | L4(10%)                | 2eq | CsOAc                          | THF                | 30  | 20%   | --    |
| 23 <sup>b</sup> | L1(10%)                | 2eq | <sup>t</sup> BuONa             | THF                | 30  | --    | 16%   |
| 24 <sup>b</sup> | L1(10%)                | 2eq | CsCO <sub>3</sub>              | THF                | 30  | --    | 30%   |
| 25 <sup>b</sup> | L1(10%)                | 2eq | K <sub>2</sub> CO <sub>3</sub> | THF                | 30  | --    | 57%   |
| 26 <sup>b</sup> | L1(10%)                | 2eq | NaOEt                          | THF                | 30  | --    | 46%   |
| 27 <sup>b</sup> | L1(10%)                | 2eq | KOAc                           | THF                | 30  | --    | 60%   |
| 28 <sup>b</sup> | L1(10%)                | 2eq | CsOAc                          | DMA                | 30  | trace | trace |
| 29 <sup>b</sup> | L1(10%)                | 2eq | CsOAc                          | Dioxane            | 30  | --    | 40%   |
| 30 <sup>b</sup> | L1(10%)                | 2eq | CsOAc                          | PhCF <sub>3</sub>  | 30  | --    | 52%   |
| 31 <sup>b</sup> | L1(10%)                | 2eq | CsOAc                          | DME                | 30  | --    | 54%   |
| 32 <sup>b</sup> | L1(10%)                | 2eq | CsOAc                          | MeOtBu             | 30  | --    | 60%   |
| 33 <sup>b</sup> | L1(10%)                | 2eq | CsOAc                          | CH <sub>3</sub> CN | 30  | --    | 72%   |
| 34 <sup>b</sup> | L1(10%)                | 2eq | CsOAc                          | CH <sub>3</sub> CN | 50  | --    | 74%   |
| 35 <sup>b</sup> | L1(10%)                | 2eq | CsOAc                          | CH <sub>3</sub> CN | 80  | --    | 82%   |
| 36 <sup>b</sup> | L1(10%)                | 1eq | CsOAc                          | CH <sub>3</sub> CN | 80  | --    | 32%   |
| 37 <sup>c</sup> | --                     | 2eq | --                             | DME                | 120 | 48%   | --    |
| 38 <sup>c</sup> | L1(10%)                | 2eq | CsOAc                          | CH <sub>3</sub> CN | 80  | --    | --    |
| 39 <sup>d</sup> | --                     | 2eq | --                             | DME                | 120 | --    | --    |
| 40 <sup>d</sup> | L1(10%)                | 2eq | CsOAc                          | CH <sub>3</sub> CN | 80  | --    | --    |
| 41 <sup>e</sup> | --                     | 2eq | --                             | DME                | 80  | --    | 80%   |
| 42 <sup>f</sup> | L1(5%)                 | 2eq | CsOAc                          | CH <sub>3</sub> CN | 80  | 82%   | --    |

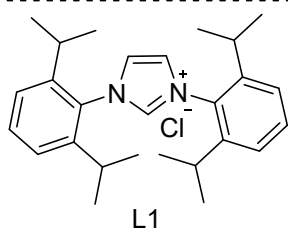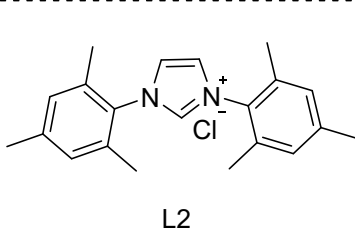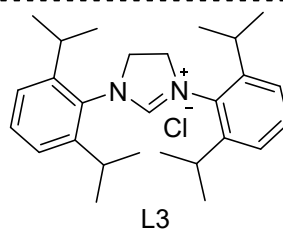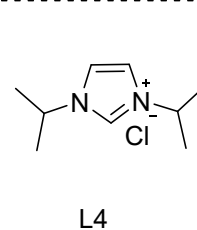

<sup>a</sup> Reaction conditions A: **1a** (0.2 mmol), **2a** (0.4 mmol), Ni(cod)<sub>2</sub> (0.02 mmol) in solvent (2.0 mL), 24h, argon.

<sup>b</sup> Reaction conditions B: **1a** (0.2 mmol), **2a** (0.4 mmol), Ni(cod)<sub>2</sub> (0.02 mmol), base (0.04 mmol), L1 (0.02 mmol) in solvent (2.0 mL), 24h, argon. <sup>c</sup> In the air. <sup>d</sup> Without Ni(cod)<sub>2</sub>. <sup>e</sup> Ni(cod)<sub>2</sub> (0.01 mmol), 40h, argon. <sup>f</sup> Ni(cod)<sub>2</sub> (0.01 mmol), base (0.02 mmol), L1 (0.01 mmol), 40h, argon.

## 2.2 Table S2. Optimization of reaction conditions of the silanol **5a**.<sup>[a]</sup>

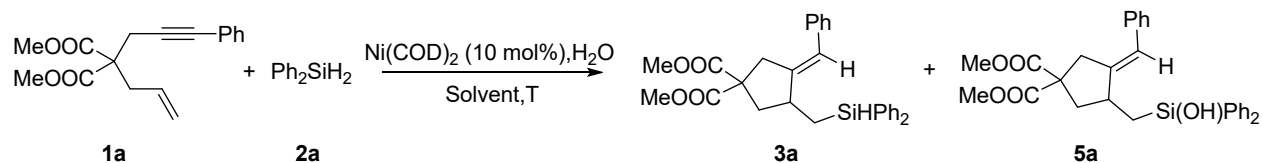

| Entry | H <sub>2</sub> O(mmol) | Ph <sub>2</sub> SiH <sub>2</sub> (mmol) | Solvent             | T (°C) | Yield (%)<br>3a | Yield (%)<br>5a |
|-------|------------------------|-----------------------------------------|---------------------|--------|-----------------|-----------------|
| 1     | 0.2                    | 0.2                                     | DME                 | 120    | 4%              | 18%             |
| 2     | 0.2                    | 0.4                                     | DME                 | 120    | 14%             | 44%             |
| 3     | 0.2                    | 0.5                                     | DME                 | 120    | 28%             | 30%             |
| 4     | 0.2                    | 0.6                                     | DME                 | 120    | 14%             | 22%             |
| 5     | 0.2                    | 0.4                                     | DME                 | 60     | 16%             | 26%             |
| 6     | 0.2                    | 0.4                                     | DME                 | 30     | 20%             | 24%             |
| 7     | 0.2                    | 0.4                                     | DME                 | 0      | 12%             | 10%             |
| 8     | 0.2                    | 0.4                                     | Toluene             | 120    | 18%             | 28%             |
| 9     | 0.2                    | 0.4                                     | MeO <sup>t</sup> Bu | 120    | 24%             | 38%             |
| 10    | 0.2                    | 0.4                                     | CH <sub>3</sub> CN  | 120    | 10%             | --              |
| 11    | 0.2                    | 0.4                                     | Dioxane             | 120    | --              | 42%             |
| 12    | 0.2                    | 0.4                                     | Dioxane             | 120    | --              | 60%             |
| 13    | 0.2                    | 0.4                                     | Dioxane             | 120    | --              | 46%             |

Reaction Conditions: **1a** (0.2 mmol), Ph<sub>2</sub>SiH<sub>2</sub> (0.2 mmol), Ni(cod)<sub>2</sub> (0.02 mmol) in solvent (2.0 mL), 24 h, isolated yields.

### 3. General procedure and Characterization

**General procedure A:** Ni(cod)<sub>2</sub> (5.6 mg, 0.02 mmol) and diphenylsilane (0.400 mmol, 2.0 equiv) in DME (2.0 mL) were charged into a pressure tube under argon. The mixture was stirred for 30 min at room temperature, followed by addition of 1, 6-enyne **1a** (0.200 mmol, 1.0 equiv). The reaction tube was then sealed and placed into an oil bath at 80 °C. After stirred for 24 h, the reaction mixture was filtered through a pad of celite. The mixture was eluted with ethyl acetate, concentrated, and purified by silica gel chromatography (PE : dioxane = 10:1) to give the indicated product **3a**.

**General procedure B:** Ni(cod)<sub>2</sub> (2.8 mg, 0.01 mmol) and IPr.HCl (4.25 mg, 0.01 mmol) and CsOAc (3.8 mg, 0.02 mmol) in CH<sub>3</sub>CN (2.0 mL) were charged into a pressure tube under argon. The mixture was stirred for 30 min at room temperature, followed by addition of diphenylsilane (0.400 mmol, 2.0 equiv) and stirred for 30 min at room temperature, then **1a** (0.200 mmol, 1.0 equiv) was added. The reaction tube was then sealed and placed into an oil bath at 80 °C. After stirred for 40 h, the reaction mixture was filtered through a pad of celite. The mixture was eluted with ethyl acetate, concentrated, and purified by silica gel chromatography (PE : dioxane = 10:1) to give the indicated product **4a**.

General procedure C: Ni(cod)<sub>2</sub> (5.6 mg, 0.02 mmol), diphenylsilane (0.400 mmol, 2.0 equiv) and H<sub>2</sub>O (5.4mg, 0.3 mmol) in Dioxane (2.0 mL) were charged into a pressure tube under argon. The mixture was stirred for 30 min at room temperature, followed by addition of **1a** (0.200 mmol, 1.0 equiv). The reaction tube was then sealed and placed into an oil bath at 120 °C. After stirred for 24 h, the reaction mixture was filtered through a pad of celite. The mixture was eluted with ethyl acetate, concentrated, and purified by silica gel chromatography (PE : EA = 5:1) to give the indicated product **5a**.

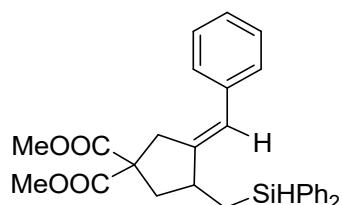

**3a**<sup>[2]</sup>, General procedure A, yellow oil. 75.3 mg (80% yield). <sup>1</sup>H NMR (400 MHz, CDCl<sub>3</sub>) δ 7.61 – 7.57 (m, 4H), 7.40 – 7.34 (m, 6H), 7.32 – 7.29 (m, 2H), 7.25 – 7.23 (m, 2H), 7.19 – 7.16 (m, 1H), 6.32 – 6.29 (m, 1H), 5.01 – 4.99 (m, 1H), 3.69 (s, 3H), 3.61 (s, 3H), 3.34 (d, *J* = 17.6 Hz, 1H), 3.14 (dt, *J* = 17.6, 2.5 Hz, 1H), 2.82 – 2.78 (m, 1H), 2.67 – 2.61 (m, 1H), 1.87 – 1.81 (m, 1H), 1.77 – 1.71 (m, 1H), 1.30 – 1.23 (m, 1H). <sup>13</sup>C NMR (101 MHz, CDCl<sub>3</sub>) δ 172.3, 172.2, 146.7, 137.9, 135.3, 135.2, 134.4, 134.0, 129.9, 128.5, 128.4, 128.3, 128.2, 126.4, 122.0, 59.1, 52.9, 52.9, 41.1, 40.9, 38.8, 17.3. HRMS (ESI, *m/z*): calcd for C<sub>29</sub>H<sub>30</sub>NaO<sub>4</sub>Si<sup>+</sup> [*M* + Na]<sup>+</sup>: 493.1806, found 493.1790.

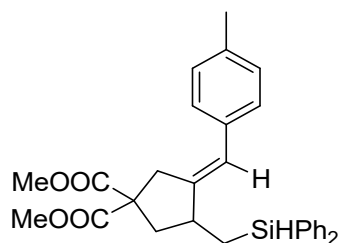

**3b**, General procedure A, yellow oil. 67.9 mg (70% yield). <sup>1</sup>H NMR (600 MHz, CDCl<sub>3</sub>) δ 7.64 – 7.61 (m, 4H), 7.43 – 7.39 (m, 6H), 7.19 – 7.14 (m, 4H), 6.31 – 6.30 (m, 1H), 5.04 – 5.03 (m, 1H), 3.72 (s, 3H), 3.64 (s, 3H), 3.37 (d, *J* = 17.5 Hz, 1H), 3.18 – 3.16 (m, 1H), 2.83 – 2.82 (m, 1H), 2.67 (dd, *J* = 12.6, 7.0 Hz, 1H), 2.36 (s, 3H), 1.86 (t, *J* = 12.0 Hz, 1H), 1.78 (dt, *J* = 14.8, 4.6 Hz, 1H), 1.32 – 1.26 (m, 1H). <sup>13</sup>C NMR (151 MHz, CDCl<sub>3</sub>) δ 172.3, 172.2, 145.7, 136.1, 135.3, 135.2, 135.0, 134.4, 134.0, 129.8, 129.1, 128.4, 128.2, 128.2, 121.8, 59.1, 52.9, 52.9, 41.1, 40.9, 38.8, 21.3, 17.2. HRMS (ESI, *m/z*): calcd for C<sub>30</sub>H<sub>32</sub>NaO<sub>4</sub>Si<sup>+</sup> [*M* + Na]<sup>+</sup>: 507.1962, found 507.1955.

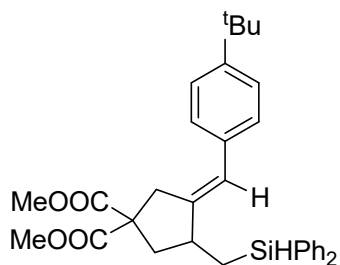

**3c**, General procedure A, yellow oil. 69.5 mg (66% yield).  $^1\text{H}$  NMR (400 MHz,  $\text{CDCl}_3$ )  $\delta$  7.62 – 7.58 (m, 4H), 7.41 – 7.33 (m, 8H), 7.20 (d,  $J = 8.4$  Hz, 2H), 6.30 – 6.26 (m, 1H), 5.01 (dd,  $J = 5.3, 2.6$  Hz, 1H), 3.71 (s, 3H), 3.62 (s, 3H), 3.36 (d,  $J = 17.6$  Hz, 1H), 3.16 (dt,  $J = 17.6, 2.4$  Hz, 1H), 2.85 – 2.75 (m, 1H), 2.66 – 2.61 (m, 1H), 1.83 (t,  $J = 11.6$  Hz, 1H), 1.78 – 1.71 (m, 1H), 1.32 (s, 9H), 1.29 – 1.25 (m, 1H).  $^{13}\text{C}$  NMR (101 MHz,  $\text{CDCl}_3$ )  $\delta$  172.3, 172.2, 149.3, 145.9, 135.3, 135.3, 135.1, 134.5, 134.1, 129.8, 129.8, 128.2, 128.2, 125.3, 121.7, 59.2, 52.9, 52.9, 41.1, 40.9, 38.8, 34.6, 31.5, 17.2. HRMS (ESI,  $m/z$ ): calcd for  $\text{C}_{33}\text{H}_{38}\text{NaO}_4\text{Si}^+$  [ $\text{M} + \text{Na}$ ] $^+$ : 549.2432, found 549.2414.

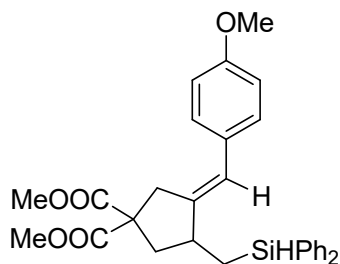

**3d**, General procedure A, yellow oil. 70.1 mg (70% yield).  $^1\text{H}$  NMR (400 MHz,  $\text{CDCl}_3$ )  $\delta$  7.63 – 7.59 (m, 4H), 7.42 – 7.36 (m, 6H), 7.20 (d,  $J = 8.6$  Hz, 2H), 6.87 (d,  $J = 8.8$  Hz, 2H), 6.26 – 6.25 (m, 1H), 5.03 – 5.01 (m, 1H), 3.81 (s, 3H), 3.71 (s, 3H), 3.63 (s, 3H), 3.34 (d,  $J = 17.4$  Hz, 1H), 3.16 – 3.11 (m, 1H), 2.82 – 2.78 (m, 1H), 2.67 – 2.63 (m, 1H), 1.88 – 1.82 (m, 1H), 1.78 – 1.82 (m, 1H), 1.37 – 1.23 (m, 2H).  $^{13}\text{C}$  NMR (101 MHz,  $\text{CDCl}_3$ )  $\delta$  172.3, 172.2, 158.2, 144.5, 135.3, 135.2, 134.5, 134.1, 130.7, 129.8, 129.6, 128.2, 128.2, 121.4, 113.9, 59.2, 55.4, 52.9, 52.9, 41.1, 40.8, 38.7, 17.2. HRMS (ESI,  $m/z$ ): calcd for  $\text{C}_{30}\text{H}_{32}\text{NaO}_5\text{Si}^+$  [ $\text{M} + \text{Na}$ ] $^+$ : 523.1911, found 523.1889.

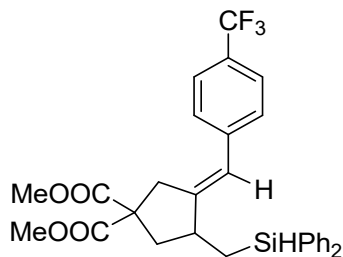

**3e**, General procedure A, colorless oil. 73.2 mg (68% yield).  $^1\text{H}$  NMR (400 MHz,  $\text{CDCl}_3$ )  $\delta$  7.63 – 7.52 (m, 6H), 7.44 – 7.35 (m, 6H), 7.33 (d,  $J = 8.2$  Hz, 2H), 6.33 – 6.32 (m, 1H), 5.01 (dd,  $J = 5.2, 2.6$  Hz, 1H), 3.72 (s, 3H), 3.63 (s, 3H), 3.33 (d,  $J = 17.6$  Hz, 1H), 3.16 – 3.10 (m, 1H), 2.89 – 2.80 (m, 1H), 2.70 – 2.65 (m, 1H), 1.90 – 1.84 (m, 1H), 1.78 – 1.71 (m, 1H), 1.32 – 1.25 (m, 1H).  $^{13}\text{C}$  NMR (101 MHz,  $\text{CDCl}_3$ )  $\delta$  172.1, 172.0, 149.7, 141.4, 135.3, 135.2, 134.2, 133.8, 129.9, 128.6, 128.3, 128.3, 128.2(q,  $J = 32.2$  Hz), 125.3(q,  $J = 3.8$  Hz), 124.4(q,  $J = 271.6$  Hz), 121.0, 59.0, 53.0, 53.0, 41.2, 40.9, 38.9, 17.2.  $^{19}\text{F}$  NMR (376 MHz,  $\text{CDCl}_3$ )  $\delta$  -62.37 (s, 3F). HRMS (ESI,  $m/z$ ): calcd for  $\text{C}_{30}\text{H}_{29}\text{F}_3\text{NaO}_4\text{Si}^+ [\text{M} + \text{Na}]^+$ : 561.1679, found 561.1655.

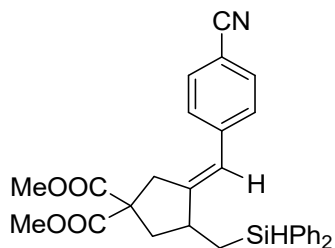

**3f**, General procedure A, colorless oil. 51.5 mg (52% yield).  $^1\text{H}$  NMR (400 MHz,  $\text{CDCl}_3$ )  $\delta$  7.61 – 7.57 (m, 6H), 7.40 – 7.35 (m, 6H), 7.30 (d,  $J = 8.4$  Hz, 2H), 6.32 – 6.27 (m, 1H), 5.00 (dd,  $J = 5.2, 2.6$  Hz, 1H), 3.72 (s, 3H), 3.63 (s, 3H), 3.31 (d,  $J = 17.6$  Hz, 1H), 3.12 (dt,  $J = 17.6, 2.6$  Hz, 1H), 2.89 – 2.78 (m, 1H), 2.70 – 2.65 (m, 1H), 1.88 (dd,  $J = 12.6, 11.4$  Hz, 1H), 1.79 – 1.66 (m, 1H), 1.35 – 1.22 (m, 1H).  $^{13}\text{C}$  NMR (101 MHz,  $\text{CDCl}_3$ )  $\delta$  171.9, 171.8, 151.2, 142.4, 135.3, 135.2, 134.1, 133.7, 132.2, 130.0, 128.9, 128.3, 128.3, 120.9, 119.2, 109.7, 59.1, 53.5, 53.0, 53.0, 41.4, 40.8, 39.0, 17.2. HRMS (ESI,  $m/z$ ): calcd for  $\text{C}_{30}\text{H}_{29}\text{NNaO}_4\text{Si}^+ [\text{M} + \text{Na}]^+$ : 518.1758, found 518.1746.

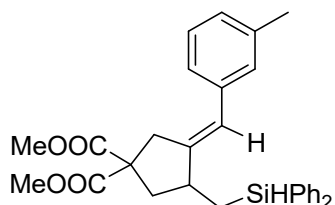



**3g**, General procedure A, colorless oil 71.7 mg (74% yield).  $^1\text{H}$  NMR (400 MHz,  $\text{CDCl}_3$ )  $\delta$  7.62 – 7.58 (m, 4H), 7.42 – 7.35 (m, 6H), 7.21 (t,  $J = 7.6$  Hz, 1H), 7.08 – 7.00 (m, 3H), 6.30 – 6.25 (m, 1H), 5.02 – 5.00 (m, 1H), 3.71 (s, 3H), 3.63 (s, 3H), 3.35 (d,  $J = 17.6$  Hz, 1H), 3.18 – 3.15 (m, 1H), 2.85 – 2.75 (m, 1H), 2.67 – 2.62 (m, 1H), 2.35 (s, 3H), 1.87 – 1.81 (m, 1H), 1.77 – 1.71 (m, 1H), 1.30 – 1.23 (m, 1H).  $^{13}\text{C}$  NMR (101 MHz,  $\text{CDCl}_3$ )  $\delta$  172.3, 172.2, 146.5, 137.9, 137.9, 135.3, 135.3, 134.4, 134.1, 129.9, 129.3, 128.3, 128.3, 128.2, 127.2, 125.6, 122.1, 59.2, 52.9, 52.9, 41.1, 41.0, 38.8, 21.6, 17.3. HRMS (ESI,  $m/z$ ): calcd for  $\text{C}_{30}\text{H}_{32}\text{NaO}_4\text{Si}^+$  [ $\text{M} + \text{Na}$ ] $^+$ : 507.1962, found 507.1944.

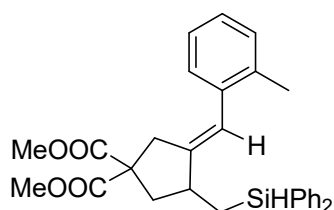

**3h**, General procedure A, 120 °C, colorless oil. 67.9 mg (70% yield).  $^1\text{H}$  NMR (400 MHz,  $\text{CDCl}_3$ )  $\delta$  7.69 – 7.55 (m, 4H), 7.40 – 7.37 (m, 6H), 7.16 – 7.13 (m, 4H), 7.38 – 7.34 (m, 1H), 5.03 – 5.01 (m, 1H), 3.67 (s, 3H), 3.62 (s, 3H), 3.15 (d,  $J = 17.4$  Hz, 1H), 3.03 – 2.91 (m, 1H), 2.80 (s, 1H), 2.66 – 2.61 (m, 1H), 2.23 (s, 3H), 1.91 – 1.85 (m, 1H), 1.78 – 1.72 (m, 1H), 1.35 – 1.28 (m, 1H).  $^{13}\text{C}$  NMR (101 MHz,  $\text{CDCl}_3$ )  $\delta$  172.3, 172.3, 147.0, 137.1, 136.3, 135.3, 135.3, 134.4, 134.1, 129.9, 129.9, 128.6, 128.3, 128.3, 126.8, 125.7, 120.5, 58.8, 52.9, 41.4, 40.2, 38.2, 20.1, 17.5. HRMS (ESI,  $m/z$ ): calcd for  $\text{C}_{30}\text{H}_{32}\text{NaO}_4\text{Si}^+$  [ $\text{M} + \text{Na}$ ] $^+$ : 507.1962, found 507.1955.

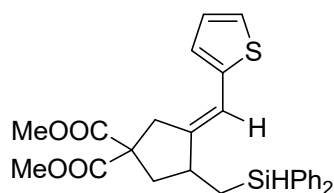

**3i**, General procedure A, 120 °C, yellow oil. 68.6 mg (72% yield).  $^1\text{H}$  NMR (400 MHz,  $\text{CDCl}_3$ )  $\delta$  7.62 – 7.58 (m, 4H), 7.41 – 7.35 (m, 6H), 7.24 (d,  $J = 5.0$  Hz, 1H), 7.02 – 7.00 (m, 1H), 6.90 (d,  $J = 3.4$  Hz, 1H), 6.53 – 6.48 (m, 1H), 5.00 (dd,  $J = 5.4, 2.6$  Hz, 1H), 3.73 (s, 3H), 3.64 (s, 3H), 3.35 (d,  $J = 17.6$  Hz, 1H), 3.16 – 3.10 (m, 1H), 2.83 – 2.77 (m, 1H), 2.69 – 2.64 (m, 1H), 1.87 (t,  $J = 12.2$  Hz, 1H), 1.76 – 1.70 (m, 1H), 1.27 – 1.19 (m, 1H).  $^{13}\text{C}$  NMR (101 MHz,  $\text{CDCl}_3$ )  $\delta$  172.2, 172.1, 145.3, 141.7, 135.3,

135.2, 134.3, 133.9, 129.9, 128.3, 128.2, 127.2, 125.9, 124.7, 115.3, 59.1, 53.0, 52.9, 41.6, 40.7, 39.3, 16.9. HRMS (ESI, m/z): calcd for  $C_{27}H_{28}NaO_4SSi^+$   $[M + H]^+$ : 499.1370, found 499.1347.

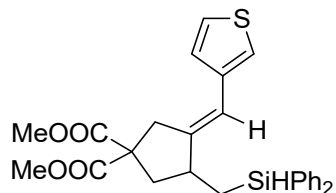

**3j**, General procedure A, yellow oil. 66.7 mg (70% yield). <sup>1</sup>H NMR (400 MHz, CDCl<sub>3</sub>) δ 7.61 – 7.57 (m, 4H), 7.40 – 7.34 (m, 6H), 7.26 – 7.24 (m, 1H), 7.07 – 7.06 (m, 2H), 6.34 – 6.28 (m, 1H), 4.99 (dd, *J* = 5.4, 2.6 Hz, 1H), 3.71 (s, 3H), 3.62 (s, 3H), 3.32 (d, *J* = 17.6 Hz, 1H), 3.13 – 3.08 (m, 1H), 2.80 – 2.74 (m, 1H), 2.67 – 2.62 (m, 1H), 1.84 (t, *J* = 12.0 Hz, 1H), 1.75 – 1.69 (m, 1H), 1.25 – 1.18 (m, 1H). <sup>13</sup>C NMR (101 MHz, CDCl<sub>3</sub>) δ 172.2, 172.1, 145.7, 139.2, 135.3, 135.2, 134.4, 134.0, 129.9, 128.4, 128.2, 128.2, 125.1, 121.9, 116.1, 59.0, 53.0, 52.9, 41.3, 40.6, 39.2, 16.9. HRMS (ESI, m/z): calcd for  $C_{27}H_{28}NaO_4SSi^+$   $[M + Na]^+$ : 499.1370, found 199.1344.

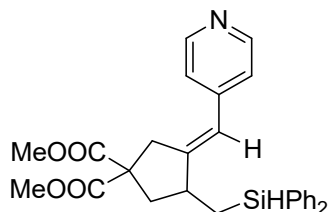

**3k**, General procedure A, 120 °C, colorless oil. 61.3 mg (65% yield). <sup>1</sup>H NMR (400 MHz, CDCl<sub>3</sub>) δ 8.52 (d, *J* = 6.0 Hz, 2H), 7.61 – 7.57 (m, 4H) 7.43 – 7.34 (m, 6H), 7.11 (d, *J* = 6.0 Hz, 1H), 6.25 – 6.2 (m, 1H), 5.00 (dd, *J* = 5.2, 2.6 Hz, 1H), 3.72 (s, 3H), 3.63 (s, 3H), 3.35 (d, *J* = 17.8 Hz, 1H), 3.15 (dt, *J* = 17.8, 2.4 Hz, 1H), 2.91 – 2.74 (m, 1H), 2.73 – 2.64 (m, 1H), 1.88 (dd, *J* = 12.6, 11.4 Hz, 1H), 1.78 – 1.68 (m, 1H), 1.33 – 1.22 (m, 1H). <sup>13</sup>C NMR (101 MHz, CDCl<sub>3</sub>) δ 171.8, 171.7, 153.2, 149.2, 145.7, 135.2, 135.1, 134.0, 133.6, 129.9, 128.3, 128.2, 123.0, 119.9, 59.0, 53.0, 53.0, 41.4, 40.7, 39.1, 17.0.

HRMS (ESI, m/z): calcd for  $C_{28}H_{30}NO_4Si^+$   $[M + H]^+$ : 472.1939, found 472.1923.

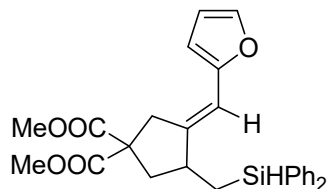

**3l**, General procedure A, 120 °C, brown oil. 65.4 mg (71% yield). <sup>1</sup>H NMR (400 MHz, CDCl<sub>3</sub>) δ 7.65 – 7.54 (m, 4H), 7.43 – 7.34 (m, 7H), 6.40 – 6.38 (m, 1H), 6.19 – 6.16 (m, 1H), 5.00 (dd, *J* = 5.4, 2.6 Hz, 1H), 3.73 (s, 3H), 3.64 (s, 3H), 3.41 (d, *J* = 19.4 Hz, 1H), 3.21 – 3.15 (m, 1H), 2.82 – 2.72 (m, 1H), 2.68 – 2.63 (m, 1H), 1.84 (t, *J* = 12.2 Hz, 1H), 1.74 – 1.68 (m, 1H), 1.23 – 1.16 (m, 1H). <sup>13</sup>C NMR (101 MHz, CDCl<sub>3</sub>) δ 172.3, 172.2, 153.5, 145.6, 141.4, 135.3, 135.2, 134.2, 133.9, 129.9, 128.2, 128.2, 111.4, 110.7, 107.8, 58.9, 53.0, 52.9, 41.4, 40.5, 39.4, 16.7. HRMS (ESI, *m/z*): calcd for C<sub>27</sub>H<sub>28</sub>NaO<sub>5</sub>Si<sup>+</sup> [M + Na]<sup>+</sup>: 483.1598, found 483.1596.

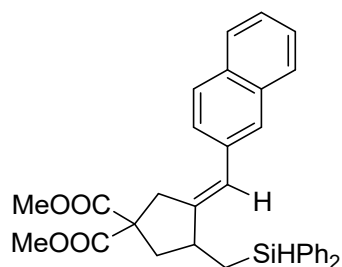

**3m**, General procedure A, yellow oil. 68.7 mg (66% yield). <sup>1</sup>H NMR (400 MHz, CDCl<sub>3</sub>) δ 7.81 (dd, *J* = 12.8, 7.2 Hz, 3H), 7.68 – 7.62 (m, 5H), 7.49 – 7.37 (m, 9H), 6.51 – 6.44 (m, 1H), 5.05 (dd, *J* = 5.2, 2.6 Hz, 1H), 3.73 (s, 3H), 3.64 (s, 3H), 3.48 (d, *J* = 18.2 Hz, 1H), 3.27 (dt, *J* = 17.6, 2.4 Hz, 1H), 2.96 – 2.81 (m, 1H), 2.79 – 2.65 (m, 1H), 1.91 (dd, *J* = 12.6, 11.4 Hz, 1H), 1.86 – 1.76 (m, 1H), 1.36–1.31 (m, 1H). <sup>13</sup>C NMR (101 MHz, CDCl<sub>3</sub>) δ 172.3, 172.2, 147.3, 135.4, 135.3, 135.2, 134.4, 134.0, 133.6, 132.1, 129.9, 128.3, 128.2, 128.1, 127.8, 127.7, 127.1, 126.2, 125.8, 122.1, 59.2, 53.0, 53.0, 41.1, 41.0, 38.9, 17.3. HRMS (ESI, *m/z*): calcd for C<sub>33</sub>H<sub>32</sub>NaO<sub>4</sub>Si<sup>+</sup> [M + Na]<sup>+</sup>: 543.1962, found 543.1943.

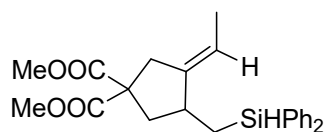

**3n**, General procedure A, colorless oil. 63.7 mg (78% yield). <sup>1</sup>H NMR (400 MHz, CDCl<sub>3</sub>) δ 7.58 – 7.55 (m, 4H), 7.42 – 7.34 (m, 6H), 5.33 – 5.28 (m, 1H), 4.95 (dd, *J* = 5.2, 2.6 Hz, 1H), 3.71 (s, 3H), 3.63 (s, 3H), 2.99 (d, *J* = 17.6 Hz, 1H), 2.81 (dd, *J* = 17.2, 1.6 Hz, 1H), 2.61 – 2.57 (m, 2H), 1.82 – 1.75 (m, 1H), 1.63 (dd, *J* = 5.2, 3.8 Hz, 1H), 1.59 (dd, *J* = 6.8, 1.8 Hz, 1H), 1.14 – 1.07 (m, 1H). <sup>13</sup>C NMR (101 MHz, CDCl<sub>3</sub>) δ 172.6, 172.4, 144.4, 135.8, 135.3, 135.2, 134.6, 134.3, 129.7, 128.1, 128.1, 115.7, 58.4, 52.8,

52.8, 42.0, 39.0, 37.0, 16.8, 14.5. HRMS (ESI, m/z): calcd for  $C_{24}H_{28}NaO_4Si^+$   $[M + Na]^+$ : 431.1649, found 431.1635.

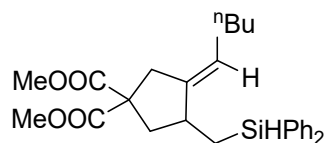

**3o**, General procedure A, colorless oil. 73.9 mg (82% yield).  $^1H$  NMR (400 MHz,  $CDCl_3$ )  $\delta$  7.59 – 7.56 (m, 4H), 7.40 – 7.34 (m, 6H), 5.25 – 5.21 (m, 1H), 4.96 (dd,  $J = 5.2, 2.6$  Hz, 1H), 3.70 (s, 3H), 3.63 (s, 3H), 2.99 (d,  $J = 17.0$  Hz, 1H), 2.82 (d,  $J = 17.0$  Hz, 1H), 2.60 – 2.55 (m, 1H), 1.98 – 1.96 (m, 1H), 1.81 – 1.74 (m, 1H), 1.64 – 1.58 (m, 1H), 1.33 – 1.27 (m, 4H), 1.14 – 1.07 (m, 1H),  $\delta$  0.89 (t,  $J = 6.8$  Hz, 3H).  $^{13}C$  NMR (101 MHz,  $CDCl_3$ )  $\delta$  172.6, 172.4, 143.5, 135.3, 135.2, 134.6, 134.3, 129.7, 128.2, 128.2, 121.8, 58.5, 52.8, 52.8, 41.9, 39.0, 37.1, 31.8, 29.0, 22.5, 17.0, 14.1. HRMS (ESI, m/z): calcd for  $C_{27}H_{34}NaO_4Si^+$   $[M + Na]^+$ : 473.2119, found 473.2102.

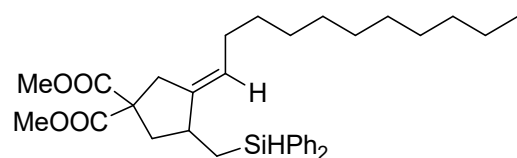

**3p**, General procedure A, colorless oil. 79.2 mg (74% yield).  $^1H$  NMR (400 MHz,  $CDCl_3$ )  $\delta$  7.59 – 7.56 (m, 4H), 7.40 – 7.34 (m, 6H), 5.25 – 5.21 (m, 1H), 4.96 (dd,  $J = 5.2, 2.6$  Hz, 1H), 3.71 (s, 3H), 3.63 (s, 3H), 2.99 (d,  $J = 17.0$  Hz, 1H), 2.82 (d,  $J = 17.0$  Hz, 1H), 2.61 – 2.56 (m, 2H), 1.98 – 1.94 (m, 1H), 1.78 (t,  $J = 14.2$  Hz, 1H), 1.64 – 1.58 (m, 1H), 1.39 – 1.38 (m, 18H), 1.14 – 1.08 (m, 1H), 0.89 (t,  $J = 6.8$  Hz, 1H).  $^{13}C$  NMR (101 MHz,  $CDCl_3$ )  $\delta$  172.6, 172.4, 143.5, 135.3, 135.2, 134.7, 134.3, 129.7, 128.2, 128.1, 121.8, 58.5, 52.8, 52.8, 41.9, 39.0, 37.1, 32.1, 29.8, 29.7, 29.6, 29.5, 29.5, 29.4, 22.8, 16.9, 14.2. HRMS (ESI, m/z): calcd for  $C_{33}H_{46}NaO_4Si^+$   $[M + Na]^+$ : 557.3058, found 557.3064.

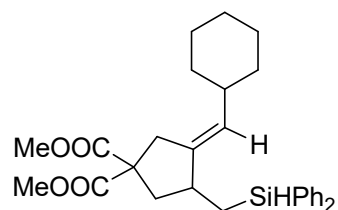

**3q**, General procedure A, yellow oil. 59.1 mg (62% yield).  $^1\text{H}$  NMR (400 MHz,  $\text{CDCl}_3$ )  $\delta$  7.60 – 7.57 (m, 4H), 7.40 – 7.34 (m, 6H), 5.08 (dd,  $J = 9.0, 2.0$  Hz, 1H), 4.96 (dd,  $J = 5.4, 2.5$  Hz, 1H), 3.71 (s, 3H), 3.64 (s, 3H), 3.01 (d,  $J = 17.0$  Hz, 1H), 2.88-2.81 (m, 1H), 2.61 – 2.54 (m, 2H), 2.09 – 1.97 (m, 1H), 1.77 – 1.57 (m, 7H), 1.31 – 0.98 (m, 6H).  $^{13}\text{C}$  NMR (101 MHz,  $\text{CDCl}_3$ )  $\delta$  172.6, 172.4, 141.8, 135.3, 135.2, 134.7, 134.3, 129.7, 128.1, 127.6, 58.5, 52.8, 52.8, 41.8, 38.9, 38.5, 36.9, 33.1, 33.1, 26.3, 26.2, 26.2, 17.0. HRMS (ESI,  $m/z$ ): calcd for  $\text{C}_{29}\text{H}_{36}\text{NaO}_4\text{Si}^+$  [ $\text{M} + \text{Na}$ ] $^+$ : 499.2275, found 499.2250

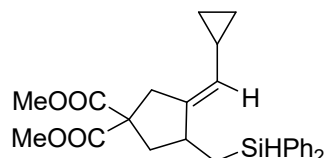

**3r**, General procedure A, colorless oil. 43.5 mg (50% yield).  $^1\text{H}$  NMR (400 MHz,  $\text{CDCl}_3$ )  $\delta$  7.57 – 7.54 (m, 4H), 7.39– 7.33 (m, 6H), 4.93 (dd,  $J = 5.4, 2.6$  Hz, 1H), 4.63 – 4.61 (m, 1H), 3.71 (s, 3H), 3.63 (s, 3H), 3.13 (dd,  $J = 17.2, 1.8$  Hz, 1H), 3.00 – 2.94 (m, 1H), 2.60 – 2.54 (m, 1H), 1.77 (t,  $J = 14.2$  Hz, 1H), 1.34 – 1.28 (m, 1H), 1.11 – 1.04 (m, 1H), 0.94 – 0.90 (m, 1H), 0.70 (dd,  $J = 8.0, 2.1$  Hz, 2H), 0.28 – 0.25 (m, 2H).  $^{13}\text{C}$  NMR (101 MHz,  $\text{CDCl}_3$ )  $\delta$  172.6, 172.4, 142.3, 135.3, 135.2, 134.6, 134.2, 129.8, 128.2, 125.3, 58.5, 52.9, 52.8, 42.0, 39.1, 37.3, 16.6, 11.3, 6.9, 6.8. HRMS (ESI,  $m/z$ ): calcd for  $\text{C}_{26}\text{H}_{30}\text{NaO}_4\text{Si}^+$  [ $\text{M} + \text{Na}$ ] $^+$ : 3457.1806, found 457.1794.

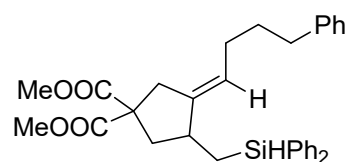

**3s**, General procedure A, colorless oil. 69.7 mg (68% yield).  $^1\text{H}$  NMR (400 MHz,  $\text{CDCl}_3$ )  $\delta$  7.57 – 7.49 (m, 4H), 7.40 – 7.32 (m, 6H), 7.24 (dd,  $J = 14.0, 6.7$  Hz, 2H), 7.16 – 7.14 (m, 3H), 5.27– 5.21 (m, 1H), 4.95 (dd,  $J = 5.2, 2.6$  Hz, 1H), 3.69 (s, 3H), 3.62 (s, 3H), 2.96 (d,  $J = 17.0$  Hz, 1H), 2.78 (d,  $J = 17.0$  Hz, 1H), 2.60 – 2.54 (m, 4H), 2.03 – 1.98 (m, 2H), 1.78 (t,  $J = 14.2$  Hz, 1H), 1.66 – 1.54 (m, 3H), 1.10– 1.06 (m, 1H).  $^{13}\text{C}$  NMR (101 MHz,  $\text{CDCl}_3$ )  $\delta$  172.5, 172.3, 144.1, 142.6, 135.3, 135.2, 134.6, 134.2, 129.7, 128.5, 128.4, 128.2, 125.8, 121.3, 58.4, 52.8, 52.8, 41.9, 39.0, 37.1, 35.6, 31.2, 28.9, 16.9. HRMS (ESI,  $m/z$ ): calcd for  $\text{C}_{32}\text{H}_{36}\text{NaO}_4\text{Si}^+$  [ $\text{M} + \text{Na}$ ] $^+$ : 535.2275, found 535.2242.

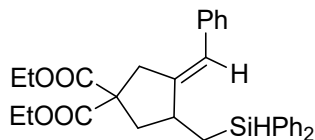

**3t**, General procedure **A**, yellow oil. 69.8 mg (70% yield).  $^1\text{H}$  NMR (400 MHz,  $\text{CDCl}_3$ )  $\delta$  7.62 – 7.58 (m, 4H), 7.39 – 7.36 (m, 6H), 7.33 – 7.29 (m, 2H), 7.26 – 7.23 (m, 2H), 7.19 – 7.15 (m, 1H), 6.31 (d,  $J = 2.2$  Hz, 1H), 5.02 – 5.00 (m, 1H), 4.18 – 4.13 (m, 2H), 4.11 – 4.05 (m, 2H), 3.33 (d,  $J = 17.4$  Hz, 1H), 3.16 – 3.11 (m, 1H), 2.84 – 2.82 (m, 1H), 2.63 (dd,  $J = 12.6, 7.2$  Hz, 1H), 1.87 – 1.81 (m, 1H), 1.79 – 1.73 (m, 1H), 1.31 – 1.26 (m, 1H), 1.21 (t,  $J = 7.0$  Hz, 3H), 1.13 (t,  $J = 7.0$  Hz, 3H).  $^{13}\text{C}$  NMR (101 MHz,  $\text{CDCl}_3$ )  $\delta$  171.8, 171.7, 147.0, 138.0, 135.3, 135.2, 134.5, 134.1, 129.8, 129.8, 128.5, 128.4, 128.2, 128.2, 126.3, 121.9, 61.7, 61.6, 59.2, 41.0, 40.9, 38.6, 17.4, 14.1, 14.0. HRMS (ESI,  $m/z$ ): calcd for  $\text{C}_{31}\text{H}_{34}\text{NaO}_4\text{Si}^+ [\text{M} + \text{H}]^+$ : 521.2119, found 521.2105.

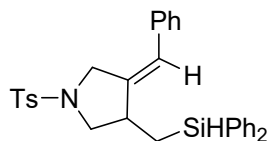

**3u** <sup>[2]</sup>, General procedure **A**, 120 °C, yellow oil. 73.4 mg (72% yield).  $^1\text{H}$  NMR (400 MHz,  $\text{CDCl}_3$ )  $\delta$  7.60 (d,  $J = 8.2$  Hz, 2H), 7.55 – 7.52 (m, 4H), 7.44 – 7.37 (m, 6H), 7.35 – 7.30 (m, 2H), 7.25 – 7.22 (m, 3H), 7.06 (d,  $J = 7.4$  Hz, 1H), 6.26 – 6.25 (m, 1H), 4.92 (dd,  $J = 4.6, 3.2$  Hz, 1H), 4.18 – 4.14 (m, 1H), 4.00 – 3.96 (m, 1H), 3.50 – 3.46 (m, 1H), 2.91 – 2.84 (m, 1H), 2.80 – 2.76 (m, 1H), 2.38 (s, 3H), 1.59 (dt,  $J = 15.0, 4.8$  Hz, 1H), 1.23 – 1.16 (m, 1H).  $^{13}\text{C}$  NMR (101 MHz,  $\text{CDCl}_3$ )  $\delta$  143.7, 142.3, 136.5, 135.2, 133.7, 133.4, 133.0, 130.1, 129.8, 128.7, 128.4, 128.3, 128.3, 127.8, 127.2, 122.6, 53.8, 50.5, 41.1, 21.6, 16.0. HRMS (ESI,  $m/z$ ): calcd for  $\text{C}_{31}\text{H}_{31}\text{NNaO}_2\text{SSi}^+ [\text{M} + \text{Na}]^+$ : 532.1737, found 532.1723.

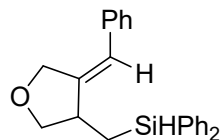

**3v** <sup>[2]</sup>, General procedure **A**, yellow oil. 39.9 mg (56% yield).  $^1\text{H}$  NMR (600 MHz,  $\text{CDCl}_3$ )  $\delta$  7.60 (t,  $J = 7.8$  Hz, 4H), 7.41 – 7.36 (m, 6H), 7.32 (t,  $J = 7.6$  Hz, 2H), 7.20 (t,  $J = 7.4$ , 1H), 7.09 (d,  $J = 7.6$  Hz, 2H), 6.34 – 6.34 (m, 1H), 4.98 – 4.96 (m, 1H), 4.64 – 4.56 (m, 2H), 3.97 – 3.94 (m, 1H), 3.41 (t,  $J = 8.0$  Hz, 1H), 2.98 (s, 1H), 1.70 (dt,  $J = 14.8, 4.6$  Hz, 1H), 1.37 – 1.32 (m, 1H).  $^{13}\text{C}$  NMR (151 MHz,  $\text{CDCl}_3$ )  $\delta$

147.0, 137.4, 135.2, 135.2, 134.1, 133.9, 130.0, 130.0, 128.6, 128.3, 128.3, 128.1, 126.7, 120.5, 73.9, 70.1, 41.9, 15.6. HRMS (ESI, m/z): calcd for C<sub>24</sub>H<sub>24</sub>NaOSi<sup>+</sup> [M + H]<sup>+</sup>: 379.1489, found 379.1487.

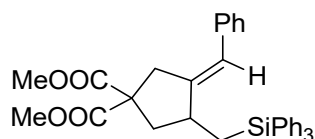

**3aa**, General procedure A, white solid, mp: 92~94 °C. 102.7 mg (94% yield). <sup>1</sup>H NMR (400 MHz, CDCl<sub>3</sub>) δ 7.59 – 7.57 (m, 6H), 7.43 – 7.37 (m, 9H), 7.32 – 7.28 (m, 2H), 7.24 (d, *J* = 7.4 Hz, 2H), 7.17 (t, *J* = 7.2 Hz, 1H), 6.31 – 6.30 (m, 1H), 3.63 (s, 3H), 3.59 (s, 3H), 3.32 (d, *J* = 17.6 Hz, 1H), 3.09 (dt, *J* = 17.6, 2.4 Hz, 1H), 2.85 – 2.83 (m, 1H), 2.33 – 2.28 (m, 1H), 2.02 (dd, *J* = 15.0, 3.4 Hz, 1H), 1.67 (t, *J* = 12.6 Hz, 1H), 1.53 – 1.46 (m, 1H). <sup>13</sup>C NMR (101 MHz, CDCl<sub>3</sub>) δ 172.3, 172.1, 147.1, 138.0, 135.9, 135.1, 129.7, 128.5, 128.4, 128.1, 126.4, 121.7, 59.0, 52.8, 41.7, 40.7, 38.7, 17.8. HRMS (ESI, m/z): calcd for C<sub>35</sub>H<sub>34</sub>NaO<sub>4</sub>Si<sup>+</sup> [M + Na]<sup>+</sup>: 569.2119, found 569.2095.

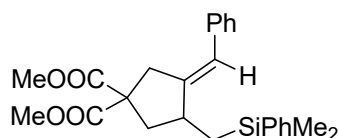

**3ab**, General procedure A, 120 °C, yellow oil. 76.1 mg (90% yield). <sup>1</sup>H NMR (400 MHz, CDCl<sub>3</sub>) δ 7.58 – 7.55 (m, 2H), 7.39 – 7.37 (m, 3H), 7.33 – 7.27 (m, 4H), 7.19 (t, *J* = 7.2 Hz, 1H), 6.27 – 6.26 (m, 1H), 3.72 (s, 3H), 3.68 (s, 3H), 3.35 (d, *J* = 17.6 Hz, 1H), 3.18 (dt, *J* = 17.6, 2.4 Hz, 1H), 2.74 – 2.70 (m, 1H), 2.62 – 2.57 (m, 1H), 1.70 (t, *J* = 11.8 Hz, 1H), 1.41 (dd, *J* = 14.6, 3.6 Hz, 1H), 0.88 (dd, *J* = 14.6, 10.8 Hz, 1H), 0.40 (s, 3H), 0.39 (s, 3H). <sup>13</sup>C NMR (101 MHz, CDCl<sub>3</sub>) δ 172.3, 172.3, 147.3, 139.3, 138.1, 133.7, 129.1, 128.5, 128.4, 128.0, 126.3, 121.6, 59.2, 52.9, 41.4, 41.0, 38.6, 20.5, -1.70, -2.16. HRMS (ESI, m/z): calcd for C<sub>25</sub>H<sub>30</sub>NaO<sub>4</sub>Si<sup>+</sup> [M + Na]<sup>+</sup>: 445.1806, found 445.1795.

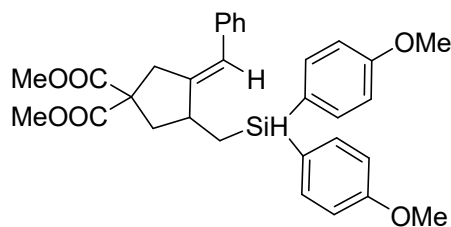

**3ac**, General procedure **A**, 120 °C, yellow oil. 87.0 mg (82% yield). <sup>1</sup>H NMR (400 MHz, CDCl<sub>3</sub>) δ 7.52 (dd, *J* = 8.4, 6.4 Hz, 4H), 7.32 (t, *J* = 7.6 Hz, 2H), 7.26 (t, *J* = 3.6 Hz, 3H), 7.19 (t, *J* = 7.2 Hz, 1H), 6.95 – 6.91 (m, 4H), 6.30 (d, *J* = 2.2 Hz, 1H), 4.98 (dd, *J* = 5.2, 2.6 Hz, 1H), 3.82 (d, *J* = 0.8 Hz, 6H), 3.71 (s, 3H), 3.64 (s, 3H), 3.35 (d, *J* = 18.2 Hz, 1H), 3.16 (dt, *J* = 17.6, 2.4 Hz, 1H), 2.86 – 2.76 (m, 1H), 2.65 (dd, *J* = 12.6, 7.2 Hz, 1H), 1.84 (t, *J* = 12.2 Hz, 1H), 1.69 (dt, *J* = 16.6, 4.6 Hz, 1H), 1.27 – 1.18 (m, 1H). <sup>13</sup>C NMR (101 MHz, CDCl<sub>3</sub>) δ 172.3, 172.2, 161.1, 161.1, 146.9, 138.0, 136.8, 136.7, 128.5, 128.4, 126.4, 125.5, 125.2, 121.9, 114.1, 114.0, 59.2, 55.2, 52.9, 52.9, 41.1, 41.0, 38.8, 17.8. HRMS (ESI, *m/z*): calcd for C<sub>31</sub>H<sub>34</sub>NaO<sub>6</sub>Si<sup>+</sup> [*M* + Na]<sup>+</sup>: 553.2017, found 553.2016.

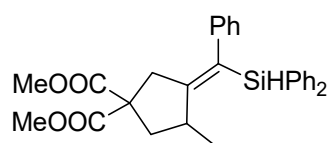

**4a**, General procedure **B**, colorless oil. 79.1 mg (84% yield). <sup>1</sup>H NMR (400 MHz, CDCl<sub>3</sub>) δ 7.44 – 7.38 (m, 4H), 7.37 – 7.24 (m, 6H), 7.14 – 7.05 (m, 3H), 6.80 – 6.78 (m, 2H), 5.41 (s, 1H), 3.69 (s, 3H), 3.66 (s, 3H), 3.22 – 3.14 (m, 1H), 3.02 (dd, *J* = 17.0, 1.2 Hz, 1H), 2.77 – 2.70 (m, 2H), 2.03 (dd, *J* = 13.6, 4.6 Hz, 1H), 1.14 (d, *J* = 7.2 Hz, 3H). <sup>13</sup>C NMR (101 MHz, CDCl<sub>3</sub>) δ 172.6, 172.3, 161.7, 143.1, 136.0, 136.0, 133.7, 133.2, 130.6, 129.7, 129.7, 128.7, 128.1, 128.0, 127.9, 125.7, 58.8, 52.8, 52.8, 41.4, 40.1, 37.5, 23.0. HRMS (ESI, *m/z*): calcd for C<sub>29</sub>H<sub>30</sub>NaO<sub>4</sub>Si<sup>+</sup> [*M* + Na]<sup>+</sup>: 493.1806, found 493.1789.

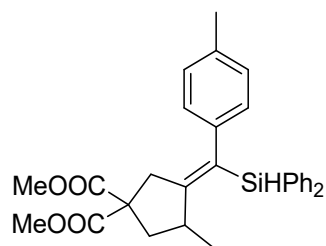

**4b**, General procedure **B**, white solid, mp: 67~69 °C. 77.5 mg (80% yield). <sup>1</sup>H NMR (400 MHz, CDCl<sub>3</sub>) δ 7.46 – 7.42 (m, 4H), 7.39 – 7.24 (m, 6H), 6.94 (d, *J* = 8.0 Hz, 2H), 6.69 (d, *J* = 8.0 Hz, 2H), 5.41 (s, 1H), 3.70 (s, 3H), 3.67 (s, 3H), 3.23 – 3.14 (m, 1H), 3.06 – 3.01 (m, 1H), 2.78 – 2.72 (m, 2H), 2.26 (s, 3H), 2.03 (dd, *J* = 13.6, 4.6 Hz, 1H), 1.14 (d, *J* = 7.2 Hz, 3H). <sup>13</sup>C NMR (101 MHz, CDCl<sub>3</sub>) δ 172.7, 172.4, 161.7, 140.1, 136.0, 136.0, 135.2, 133.9, 133.3, 130.4, 129.6, 129.6, 128.8, 128.6, 127.9, 127.9, 58.8, 52.8, 52.7, 41.4, 40.1, 37.5, 23.0, 21.16. HRMS (ESI, *m/z*): calcd for C<sub>30</sub>H<sub>32</sub>NaO<sub>4</sub>Si<sup>+</sup> [*M* + Na]<sup>+</sup>: 507.1962, found 507.1956.



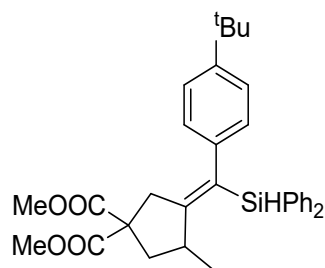

**4c**, General procedure **B**, yellow solid, mp: 73~75 °C. 81.1 mg (77% yield).  $^1\text{H}$  NMR (400 MHz,  $\text{CDCl}_3$ )  $\delta$  7.43 – 7.32 (m, 6H), 7.31 – 7.27 (m, 2H), 7.23 (d,  $J = 7.0$  Hz, 2H), 7.11 (d,  $J = 8.4$  Hz, 2H), 6.71 – 6.69 (m, 2H), 5.38 (s, 1H), 3.69 (s, 3H), 3.67 (s, 3H), 3.16 – 3.12 (m, 1H), 3.05 – 3.00 (m, 1H), 2.81 – 2.70 (m, 2H), 2.01 (dd,  $J = 13.4, 4.6$  Hz, 1H), 1.24 (s, 9H), 1.11 (d,  $J = 7.0$  Hz, 3H).  $^{13}\text{C}$  NMR (101 MHz,  $\text{CDCl}_3$ )  $\delta$  172.7, 172.4, 161.4, 148.5, 140.0, 136.1, 136.0, 134.5, 134.0, 133.5, 130.3, 129.6, 129.6, 128.26, 127.9, 127.8, 125.0, 58.9, 52.9, 52.8, 41.5, 40.1, 37.6, 34.4, 31.5, 23.0. HRMS (ESI,  $m/z$ ): calcd for  $\text{C}_{33}\text{H}_{38}\text{NaO}_4\text{Si}^+$  [ $\text{M} + \text{Na}$ ] $^+$ : 549.2432, found 549.2418.

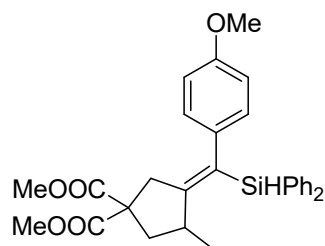

**4d**, General procedure **B**, white solid, mp: 68~70 °C. 86.1 mg (86% yield).  $^1\text{H}$  NMR (400 MHz,  $\text{CDCl}_3$ )  $\delta$  7.44 – 7.40 (m, 4H), 7.36 – 7.24 (m, 6H), 6.71 – 6.65 (m, 4H), 5.40 (s, 1H), 3.72 (s, 3H), 3.69 (s, 3H), 3.66 (s, 3H), 3.22 – 3.14 (m, 1H), 3.02 (dd,  $J = 17.0, 1.2$  Hz, 1H), 2.76 – 2.71 (m, 1H), 2.02 (dd,  $J = 13.6, 4.4$  Hz, 1H), 1.13 (d,  $J = 7.2$  Hz, 3H).  $^{13}\text{C}$  NMR (101 MHz,  $\text{CDCl}_3$ )  $\delta$  172.7, 172.4, 162.0, 157.8, 136.0, 136.0, 135.4, 133.9, 133.4, 130.0, 129.8, 129.7, 129.6, 128.0, 127.9, 58.8, 55.3, 52.8, 52.8, 41.4, 40.1, 37.5, 23.1. HRMS (ESI,  $m/z$ ): calcd for  $\text{C}_{30}\text{H}_{32}\text{NaO}_5\text{Si}^+$  [ $\text{M} + \text{Na}$ ] $^+$ : 523.1911, found 523.1882.

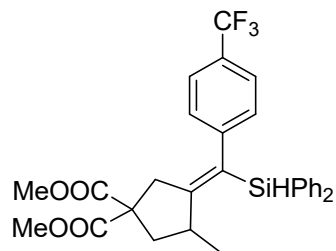

**4e**, General procedure **B**, colorless oil. 87.3 mg (81% yield).  $^1\text{H}$  NMR (400 MHz,  $\text{CDCl}_3$ )  $\delta$  7.43 – 7.35 (m, 8H), 7.34 – 7.26 (m, 4H), 6.89 (d,  $J = 8.0$  Hz, 2H), 5.42 (s, 1H), 3.71 (s, 3H), 3.69 (s, 3H), 3.24 – 3.15 (m, 1H), 2.98 (dd,  $J = 16.8, 1.2$  Hz, 1H), 2.74 (dd,  $J = 13.6, 9.0$  Hz, 1H), 2.65 (d,  $J = 17.0$  Hz, 1H), 2.07 (dd,  $J = 13.6, 4.6$  Hz, 1H), 1.17 (d,  $J = 7.0$  Hz, 3H).  $^{13}\text{C}$  NMR (101 MHz,  $\text{CDCl}_3$ )  $\delta$  172.4, 172.2, 162.6, 147.1, 135.9, 135.9, 132.9, 132.5, 130.0, 129.9, 129.8, 129.0, 128.2(q,  $J = 36.4$  Hz), 128.1, 128.1, 125.1(q,  $J = 3.8$  Hz), 124.5(q,  $J = 272.0$  Hz), 58.8, 53.0, 52.9, 41.3, 40.2, 37.6, 23.0.  $^{19}\text{F}$  NMR (377 MHz,  $\text{CDCl}_3$ )  $\delta$  -64.55 (s, 3F). HRMS (ESI,  $m/z$ ): calcd for  $\text{C}_{30}\text{H}_{29}\text{F}_3\text{NaO}_4\text{Si}^+$   $[\text{M} + \text{Na}]^+$ : 561.1679, found 561.1661.

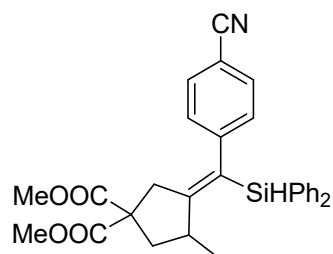

**4f**, General procedure **B**, white solid, mp: 86~88 °C. 59.5 mg (60% yield).  $^1\text{H}$  NMR (400 MHz,  $\text{CDCl}_3$ )  $\delta$  7.42 – 7.37 (m, 7H), 7.35 – 7.26 (m, 4H), 6.89 – 6.87 (m, 2H), 5.43 (s, 1H), 3.71 (s, 3H), 3.69 (s, 3H), 3.22 – 3.14 (m, 1H), 2.96 (dd,  $J = 17.0, 1.4$  Hz, 1H), 2.76 – 2.70 (m, 1H), 2.63 (d,  $J = 17.0$  Hz, 1H), 2.08 (dd,  $J = 13.6, 4.6$  Hz, 1H), 1.17 (d,  $J = 7.2$  Hz, 3H).  $^{13}\text{C}$  NMR (101 MHz,  $\text{CDCl}_3$ )  $\delta$  172.3, 172.1, 162.9, 148.5, 135.8, 135.8, 132.6, 132.2, 132.0, 130.1, 130.1, 129.8, 129.5, 128.2, 128.1, 119.2, 109.6, 58.7, 53.0, 52.9, 41.2, 40.2, 37.7, 22.9. HRMS (ESI,  $m/z$ ): calcd for  $\text{C}_{30}\text{H}_{29}\text{NNaO}_4\text{Si}^+$   $[\text{M} + \text{Na}]^+$ : 518.1758, found 518.1735.

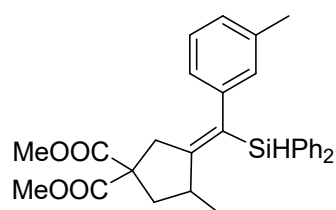

**4g**, General procedure **B**, colorless oil. 78.5 mg (81% yield).  $^1\text{H}$  NMR (400 MHz,  $\text{CDCl}_3$ )  $\delta$  7.44 – 7.40 (m, 4H), 7.36 – 7.24 (m, 6H), 7.01 (t,  $J = 7.6$  Hz, 1H), 6.88 (d,  $J = 7.6$  Hz, 1H), 6.61 (d,  $J = 7.6$  Hz, 1H), 6.53 (s, 1H), 5.39 (s, 1H), 3.69 (s, 3H), 3.66 (s, 3H), 3.20 – 3.12 (m, 1H), 3.03 (dd,  $J = 17.2, 1.4$  Hz, 1H), 2.77 – 2.71 (m, 2H), 2.14 (s, 3H), 2.01 (dd,  $J = 13.6, 4.4$  Hz, 1H), 1.12 (d,  $J = 7.2$  Hz, 3H).  $^{13}\text{C}$  NMR (101 MHz,  $\text{CDCl}_3$ )  $\delta$  172.7, 172.4, 161.4, 142.9, 137.9, 136.0, 136.0, 133.9, 133.3, 130.6, 129.7, 129.6, 129.6, 128.0, 127.9, 127.9, 126.4, 125.7, 58.8, 52.8, 52.8, 41.4, 40.1, 37.5, 23.0, 21.4. HRMS (ESI,  $m/z$ ): calcd for  $\text{C}_{30}\text{H}_{32}\text{NaO}_4\text{Si}^+$  [ $\text{M} + \text{Na}$ ] $^+$ : 507.1962, found 507.1942.

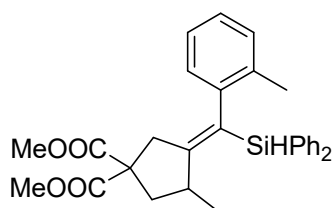

**4h**, General procedure **B**, 10 mmol% Ni catalysis, 80 °C, yellow oil. 54.3 mg (56% yield).  $d_r = 1: 1.7$ ;  $^1\text{H}$  NMR (400 MHz,  $\text{CDCl}_3$ )  $\delta$  (mixture of isomers) major: 7.56 – 7.50 (m, 4H), 7.40 – 6.90 (m, 10H), 6.64 (d,  $J = 7.4$  Hz, 1H), 5.42 (s, 1H), 3.70 (s, 3H), 3.69 (s, 3H), 3.21 – 3.15 (m, 1H), 2.87 – 2.77 (m, 2H), 2.61 (d,  $J = 16.8$  Hz, 1H), 2.09 – 2.03 (m, 1H), 1.87 (s, 3H), 1.20 (d,  $J = 7.2$  Hz, 3H).  $\delta$  minor: 5.32 (s, 1H), 3.69 (s, 3H), 3.66 (s, 3H), 3.15 – 3.10 (m, 1H), 2.97 (dd,  $J = 17.6, 1.2$  Hz, 1H), 2.72 (dd,  $J = 13.2, 8.4$  Hz, 1H), 2.01 – 1.98 (m, 1H), 1.75 (s, 3H), 1.13 (d,  $J = 7.2$  Hz, 3H).  $^{13}\text{C}$  NMR (101 MHz,  $\text{CDCl}_3$ )  $\delta$  mixture of isomers, 172.7, 172.6, 172.5, 172.4, 161.7, 161.1, 142.5, 142.0, 136.1, 136.0, 135.9, 135.7, 135.0, 134.0, 133.8, 133.4, 132.7, 130.2, 130.0, 129.7, 129.7, 129.7, 129.6, 128.9, 128.1, 127.9, 127.8, 127.7, 126.3, 126.1, 125.8, 125.6, 58.6, 58.3, 52.7, 52.7, 52.6, 42.1, 41.4, 41.1, 39.8, 37.7, 37.3, 22.9, 22.6, 19.5, 19.5. HRMS (ESI,  $m/z$ ): calcd for  $\text{C}_{30}\text{H}_{32}\text{NaO}_4\text{Si}^+$  [ $\text{M} + \text{Na}$ ] $^+$ : 507.1962, found 507.1973.

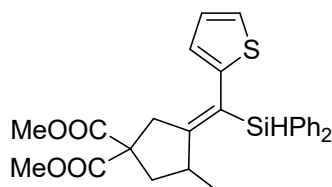

**4i**, General procedure **B**, white solid, mp: 110~112 °C 65.8 mg (69% yield).  $^1\text{H}$  NMR (400 MHz,  $\text{CDCl}_3$ )  $\delta$  7.47 – 7.44 (m, 4H), 7.40 – 7.28 (m, 6H), 7.06 (dd,  $J = 5.2, 1.0$  Hz, 1H), 6.81 – 6.79 (m, 1H), 6.38 (dd,  $J = 3.4, 1.0$  Hz, 1H), 5.45 (s, 1H), 3.73 (s, 3H), 3.70 (s, 3H), 3.29 – 3.18 (m, 2H), 3.05 (d,  $J = 17.2$  Hz,

1H), 2.77 (dd,  $J = 13.4, 8.2$  Hz, 1H), 2.04 (dd,  $J = 13.6, 4.8$  Hz, 1H), 1.16 (d,  $J = 7.2$  Hz, 3H).  $^{13}\text{C}$  NMR (101 MHz,  $\text{CDCl}_3$ )  $\delta$  172.5, 172.2, 165.7, 144.0, 136.0, 135.9, 133.4, 132.8, 129.9, 128.0, 128.0, 126.8, 125.5, 124.4, 123.2, 58.9, 52.9, 52.9, 41.3, 40.7, 37.9, 23.1. HRMS (ESI,  $m/z$ ): calcd for  $\text{C}_{27}\text{H}_{28}\text{NaO}_4\text{SSi}^+ [\text{M} + \text{Na}]^+$ : 499.1370, found 499.1356.

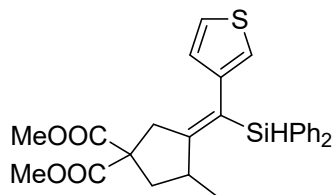

**4j**, General procedure **B**, white solid, mp: 88~90 °C. 74.3 mg (78% yield).  $^1\text{H}$  NMR (400 MHz,  $\text{CDCl}_3$ )  $\delta$  7.44 – 7.41 (m, 4H), 7.39 – 7.26 (m, 6H), 7.10 (dd,  $J = 5.0, 3.0$  Hz, 1H), 6.58 – 6.54 (m, 2H), 5.43 (s, 1H), 3.73 (s, 3H), 3.69 (s, 3H), 3.28 – 3.19 (m, 1H), 3.10 (dd,  $J = 17.0, 1.6$  Hz, 1H), 2.88 (d,  $J = 17.0$  Hz, 1H), 2.79 – 2.74 (m, 1H), 2.07 – 2.03 (m, 1H), 1.17 (d,  $J = 7.2$  Hz, 3H).  $^{13}\text{C}$  NMR (101 MHz,  $\text{CDCl}_3$ )  $\delta$  172.6, 172.3, 162.9, 142.6, 135.9, 135.9, 133.8, 133.2, 129.8, 128.9, 128.0, 128.0, 125.3, 124.7, 121.1, 58.9, 52.9, 52.8, 41.4, 40.4, 37.6, 23.2. HRMS (ESI,  $m/z$ ): calcd for  $\text{C}_{27}\text{H}_{28}\text{NaO}_4\text{SSi}^+ [\text{M} + \text{Na}]^+$ : 499.1370, found 499.1334.

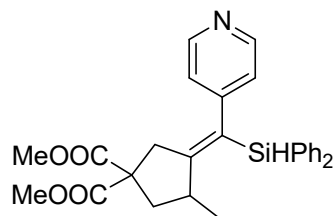

**4k**, General procedure **B**, yellow oil. 54.7 mg (58% yield).  $^1\text{H}$  NMR (400 MHz,  $\text{CDCl}_3$ )  $\delta$  8.42 – 8.27 (m, 2H), 7.44 – 7.37 (m, 6H), 7.36 – 7.28 (m, 4H), 6.85 – 6.62 (m, 2H), 5.42 (s, 1H), 3.71 (s, 3H), 3.69 (s, 3H), 3.24 – 3.13 (m, 1H), 2.99 (d,  $J = 17.1$  Hz, 1H), 2.73 (dd,  $J = 14.0, 8.0$  Hz, 1H), 2.66 (d,  $J = 17.0$  Hz, 1H), 2.07 (dd,  $J = 13.6, 4.6$  Hz, 1H), 1.16 (d,  $J = 7.1$  Hz, 3H).  $^{13}\text{C}$  NMR (101 MHz,  $\text{CDCl}_3$ )  $\delta$  171.8, 171.7, 153.2, 149.2, 145.7, 135.2, 135.1, 134.0, 133.6, 129.9, 128.3, 128.2, 123.0, 119.9, 59.0, 53.0, 53.0, 41.4, 40.7, 39.1, 17.0. HRMS (ESI,  $m/z$ ): calcd for  $\text{C}_{28}\text{H}_{30}\text{NO}_4\text{Si}^+ [\text{M} + \text{H}]^+$ : 472.1939, found 472.1906.

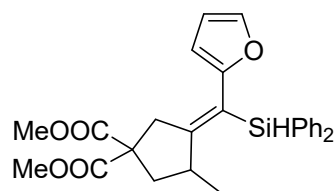

**4l**, General procedure **B**, 10 mmol% Ni catalysis 80 °C, yellow oil. 68.2 mg (74% yield). <sup>1</sup>H NMR (400 MHz, CDCl<sub>3</sub>) δ 7.56 – 7.50 (m, 4H), 7.39 – 7.29 (m, 6H), 7.21 (d, *J* = 1.4 Hz, 1H), 6.25 (dd, *J* = 3.4, 1.8 Hz, 1H), 5.94 (d, *J* = 3.2 Hz, 1H), 5.46 (s, 1H), 3.76 (s, 3H), 3.70 (s, 3H), 3.50 (d, *J* = 18.0 Hz, 1H), 3.37 – 3.27 (m, 1H), 3.21 (d, *J* = 18.0 Hz, 1H), 2.67 (dd, *J* = 13.4, 8.0 Hz, 1H), 2.12 (dd, *J* = 13.4, 3.6 Hz, 1H), 1.10 (d, *J* = 7.2 Hz, 3H). <sup>13</sup>C NMR (101 MHz, CDCl<sub>3</sub>) δ 163.3, 155.1, 140.8, 135.8, 135.8, 134.5, 134.0, 133.3, 129.7, 129.7, 128.0, 118.2, 118.1, 111.0, 108.8, 59.3, 53.0, 53.0, 41.7, 40.9, 39.0, 23.0. HRMS (ESI, *m/z*): calcd for C<sub>27</sub>H<sub>28</sub>NaO<sub>5</sub>Si<sup>+</sup> [*M* + Na]<sup>+</sup>: 483.1598, found 483.1580.

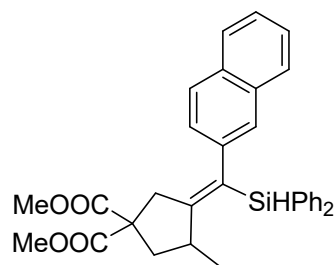

**4m**, General procedure **B**, yellow oil. 77.1 mg (74% yield). <sup>1</sup>H NMR (400 MHz, CDCl<sub>3</sub>) δ 7.73 – 7.71 (m, 1H), 7.62 – 7.55 (m, 2H), 7.46 – 7.43 (m, 4H), 7.38 – 7.19 (m, 9H), 6.97 – 6.95 (m, 1H), 5.48 (s, 1H), 3.67 (s, 3H), 3.64 (s, 3H), 3.29 – 3.19 (m, 1H), 3.06 (d, *J* = 17.0 Hz, 1H), 2.80 – 2.68 (m, 2H), 2.07 – 2.03 (m, 2H), 1.18 (d, *J* = 4.8 Hz, 3H). <sup>13</sup>C NMR (101 MHz, CDCl<sub>3</sub>) δ 172.6, 172.3, 162.3, 140.7, 136.0, 133.7, 133.5, 133.1, 131.8, 130.6, 129.8, 129.7, 128.0, 127.9, 127.8, 127.8, 127.6, 127.1, 125.8, 125.3, 58.8, 52.8, 52.8, 41.4, 40.3, 37.6, 23.1. HRMS (ESI, *m/z*): calcd for C<sub>33</sub>H<sub>32</sub>NaO<sub>4</sub>Si<sup>+</sup> [*M* + Na]<sup>+</sup>: 543.1962, found 543.1947.

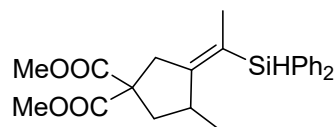

**4n**, General procedure **B**, 10 mmol% Ni catalysis 80 °C, colorless oil. 65.4 mg (80% yield). <sup>1</sup>H NMR (400 MHz, CDCl<sub>3</sub>) δ 7.57 – 7.54 (m, 2H), 7.51 – 7.49 (m, 2H), 7.42 – 7.33 (m, 6H), 5.29 (s, 1H), 3.76 (s, 3H), 3.73 (s, 1H), 3.21 (d, *J* = 17.4 Hz, 1H), 3.13 – 3.00 (m, 2H), 2.63 (dd, *J* = 13.4, 8.2 Hz, 1H), 2.10

(dd,  $J = 13.4, 3.8$  Hz, 1H), 1.70 (s, 3H), 1.01 (d,  $J = 7.2$  Hz, 3H).  $^{13}\text{C}$  NMR (101 MHz,  $\text{CDCl}_3$ )  $\delta$  173.0, 172.7, 160.2, 135.9, 135.8, 133.8, 129.7, 129.7, 128.1, 128.1, 120.7, 58.9, 53.0, 53.0, 41.7, 39.0, 38.0, 23.0, 19.0. HRMS (ESI,  $m/z$ ): calcd for  $\text{C}_{24}\text{H}_{28}\text{NaO}_4\text{Si}^+$  [ $\text{M} + \text{Na}$ ] $^+$ : 431.1649, found 431.1638.

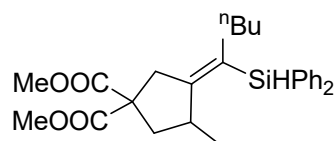

**4o**, General procedure **B**, 10 mmol% Ni catalysis 80 °C, colorless oil. 64.9 mg (72% yield).  $^1\text{H}$  NMR (400 MHz,  $\text{CDCl}_3$ )  $\delta$  7.56 – 7.51 (m, 4H), 7.42 – 7.33 (m, 6H), 5.26 (s, 1H), 3.76 (s, 3H), 3.74 (s, 3H), 3.17 – 3.08 (m, 2H), 2.97 – 2.89 (m, 1H), 2.61 (dd,  $J = 13.4, 8.0$  Hz, 1H), 2.10 – 2.04 (m, 2H), 1.98 (dd,  $J = 13.4, 4.0$  Hz, 1H), 1.11 – 1.00 (m, 4H), 0.96 (d,  $J = 7.1$  Hz, 3H), 0.68 (t,  $J = 6.9$  Hz, 3H).  $^{13}\text{C}$  NMR (101 MHz,  $\text{CDCl}_3$ )  $\delta$  172.9, 172.6, 159.8, 136.0, 135.9, 134.1, 134.0, 129.62, 128.0, 128.0, 126.4, 58.9, 52.9, 52.9, 41.3, 38.2, 37.9, 33.4, 31.7, 22.9, 22.8, 13.8. HRMS (ESI,  $m/z$ ): calcd for  $\text{C}_{27}\text{H}_{34}\text{NaO}_4\text{Si}^+$  [ $\text{M} + \text{Na}$ ] $^+$ : 473.2119, found 473.2115.

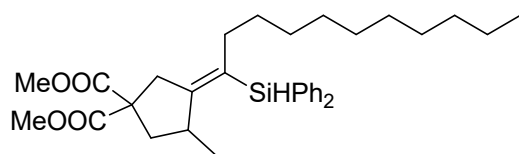

**4p**, General procedure **B**, 10 mmol% Ni catalysis 80 °C, colorless oil. 79.2 mg (74% yield).  $^1\text{H}$  NMR (400 MHz,  $\text{CDCl}_3$ )  $\delta$  7.56 – 7.51 (m, 4H), 7.42 – 7.33 (m, 6H), 5.27 (s, 1H), 3.76 (s, 3H), 3.74 (s, 3H), 3.17 – 3.08 (m, 2H), 2.96 – 2.92 (m, 1H), 2.62 (dd,  $J = 13.4, 8.0$  Hz, 1H), 2.06 (s, 1H), 1.98 (dd,  $J = 13.4, 4.0$  Hz, 1H), 1.30 – 1.13 (m, 16H), 0.97 (d,  $J = 7.2$  Hz, 3H), 0.88 (t,  $J = 7.0$  Hz, 3H).  $^{13}\text{C}$  NMR (101 MHz,  $\text{CDCl}_3$ )  $\delta$  173.0, 172.6, 159.8, 136.0, 135.9, 134.2, 134.1, 129.6, 128.0, 128.0, 126.5, 58.9, 52.9, 52.9, 41.3, 38.2, 37.9, 33.8, 32.0, 29.9, 29.7, 29.6, 29.5, 29.43, 29.4, 22.8, 14.2. HRMS (ESI,  $m/z$ ): calcd for  $\text{C}_{33}\text{H}_{46}\text{NaO}_4\text{Si}^+$  [ $\text{M} + \text{Na}$ ] $^+$ : 557.3058, found 557.3048.

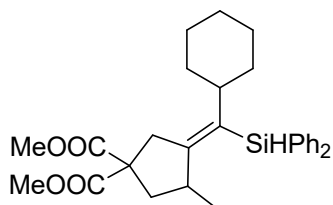

**4q**, General procedure **B**, yellow oil. 47.7 mg (50% yield).  $^1\text{H}$  NMR (400 MHz,  $\text{CDCl}_3$ )  $\delta$  7.60 (dd,  $J = 6.6, 1.4$  Hz, 4H), 7.43 – 7.32 (m, 6H), 3.76 (s, 3H), 3.76 (s, 3H), 3.15 – 2.99 (m, 2H), 2.96 – 2.86 (m, 1H), 2.71 (dd,  $J = 12.6, 7.0$  Hz, 1H), 2.34 – 2.25 (m, 1H), 1.75 (t,  $J = 12.4$  Hz, 1H), 1.65 (dd,  $J = 22.8, 7.4$  Hz, 2H), 1.54 – 1.50 (m, 2H), 1.46 – 1.33 (m, 2H), 1.23 – 1.05 (m, 3H), 1.01 – 0.78 (m, 3H).  $^{13}\text{C}$  NMR (101 MHz,  $\text{CDCl}_3$ )  $\delta$  172.6, 172.4, 141.8, 135.3, 135.2, 134.7, 134.3, 129.7, 128.1, 127.6, 58.5, 52.8, 52.8, 41.8, 38.9, 38.5, 36.9, 33.1, 33.1, 26.3, 26.2, 26.2, 17.0. HRMS (ESI,  $m/z$ ): calcd for  $\text{C}_{29}\text{H}_{36}\text{NaO}_4\text{Si}^+$  [ $\text{M} + \text{Na}$ ] $^+$ : 499.2275, found 499.2261.

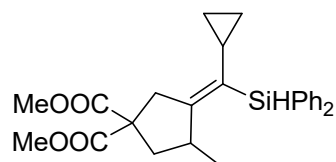

**4r**, General procedure **B**, yellow oil. 46.9 mg (54% yield).  $^1\text{H}$  NMR (400 MHz,  $\text{CDCl}_3$ )  $\delta$  7.57 – 7.54 (m, 4H), 7.42 – 7.33 (m, 6H), 5.26 (s, 1H), 3.77 (s, 3H), 3.75 (s, 3H), 3.31 (s, 1H), 3.04 – 2.96 (m, 1H), 2.62 (dd,  $J = 13.4, 8.2$  Hz, 1H), 2.01 (dd,  $J = 13.4, 4.4$  Hz, 1H), 1.32 – 1.23 (m, 3H), 0.94 (d,  $J = 7.2$  Hz, 3H), 0.62 – 0.56 (m, 1H), 0.49 – 0.43 (m, 0H), 0.37 – 0.31 (m, 1H), 0.27 – 0.22 (m, 1H).  $^{13}\text{C}$  NMR (101 MHz,  $\text{CDCl}_3$ )  $\delta$  173.0, 172.7, 164.9, 135.9, 135.8, 134.6, 134.4, 129.6, 129.5, 128.0, 126.4, 76.8, 58.9, 52.9, 41.5, 40.0, 37.8, 22.9, 15.4, 7.4, 6.7. HRMS (ESI,  $m/z$ ): calcd for  $\text{C}_{26}\text{H}_{30}\text{NaO}_4\text{Si}^+$  [ $\text{M} + \text{Na}$ ] $^+$ : 457.1806, found 457.1799.

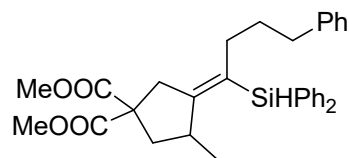

**4s**, General procedure **B**, colorless oil. 67.7 mg (66% yield).  $^1\text{H}$  NMR (400 MHz,  $\text{CDCl}_3$ )  $\delta$  7.54 – 7.49 (m, 4H), 7.42 – 7.33 (m, 6H), 7.21 – 7.10 (m, 3H), 6.93 (d,  $J = 7.0$  Hz, 2H), 5.27 (s, 1H), 3.75 (s, 3H), 3.70 (s, 3H), 3.13 – 3.03 (m, 2H), 2.97 – 2.92 (m, 1H), 2.61 (dd,  $J = 13.4, 8.2$  Hz, 1H), 2.34 (t,  $J = 7.8$  Hz, 2H), 2.15 – 2.10 (m, 2H), 1.98 (dd,  $J = 13.4, 4.2$  Hz, 1H), 1.39 – 1.34 (m, 2H), 0.97 (d,  $J = 7.0$  Hz, 3H).  $^{13}\text{C}$  NMR (101 MHz,  $\text{CDCl}_3$ )  $\delta$  172.9, 172.5, 160.2, 142.4, 136.0, 135.9, 133.9, 133.9, 129.7, 128.4, 128.3, 128.1, 128.1, 126.0, 125.7, 58.9, 53.0, 52.9, 41.2, 38.2, 37.9, 36.3, 33.5, 31.4, 22.8. HRMS (ESI,  $m/z$ ): calcd for  $\text{C}_{32}\text{H}_{36}\text{NaO}_4\text{Si}^+$  [ $\text{M} + \text{Na}$ ] $^+$ : 535.2275, found 535.2258.

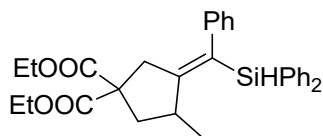

**4t**, General procedure **B**, colorless oil. 83.8 mg (84% yield).  $^1\text{H}$  NMR (400 MHz,  $\text{CDCl}_3$ )  $\delta$  7.44 – 7.40 (m, 4H), 7.36 – 7.24 (m, 6H), 7.13 – 7.04 (m, 3H), 6.80 – 6.78 (m, 2H), 5.41 (s, 1H), 4.18 – 4.09 (m, 4H), 3.21 – 3.16 (m, 1H), 3.02 (dd,  $J = 17.0, 1.6$  Hz, 1H), 2.77 – 2.70 (m, 2H), 1.99 (dd,  $J = 13.4, 4.6$  Hz, 1H), 1.21 (t,  $J = 7.2$  Hz, 3H), 1.16 (dd,  $J = 13.8, 7.0$  Hz, 6H).  $^{13}\text{C}$  NMR (101 MHz,  $\text{CDCl}_3$ )  $\delta$  172.2, 171.9, 162.1, 143.2, 136.0, 136.0, 133.8, 133.3, 130.3, 129.7, 129.6, 128.8, 128.1, 127.9, 127.9, 125.7, 61.6, 61.6, 59.0, 41.3, 40.0, 37.6, 23.1, 14.1. HRMS (ESI,  $m/z$ ): calcd for  $\text{C}_{31}\text{H}_{34}\text{NaO}_4\text{Si}^+$  [ $\text{M} + \text{Na}$ ] $^+$ : 521.2119, found 521.2111.

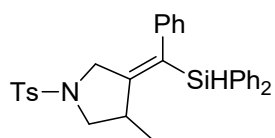

**4u**, General procedure **B**, 10 mmol% Ni catalysis 80 °C, white solid, mp: 135~137 °C. 78.5 mg (77% yield).  $^1\text{H}$  NMR (400 MHz,  $\text{CDCl}_3$ )  $\delta$  7.61 (d,  $J = 8.2$  Hz, 2H), 7.38 – 7.35 (m, 6H), 7.31 – 7.26 (m, 6H), 7.15 – 7.13 (m, 3H), 6.73 – 6.70 (m, 2H), 5.33 (s, 1H), 3.95 (d,  $J = 15.6$  Hz, 1H), 3.49 (d,  $J = 15.6$  Hz, 1H), 3.30 (d,  $J = 8.8$  Hz, 1H), 3.20 – 3.11 (m, 2H), 2.44 (s, 3H), 1.10 (d,  $J = 6.8$  Hz, 3H).  $^{13}\text{C}$  NMR (101 MHz,  $\text{CDCl}_3$ )  $\delta$  156.7, 143.6, 141.7, 135.9, 135.8, 133.3, 132.9, 132.5, 131.3, 130.0, 130.0, 129.7, 128.4, 128.1, 128.1, 128.0, 127.9, 126.4, 55.1, 50.9, 38.1, 21.7, 21.0. HRMS (ESI,  $m/z$ ): calcd for  $\text{C}_{31}\text{H}_{31}\text{NNaO}_2\text{SSi}^+$  [ $\text{M} + \text{Na}$ ] $^+$ : 532.1737, found 532.1713.

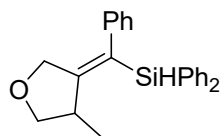

**4v**, General procedure **B**, 10 mmol% Ni catalysis 80 °C, colorless oil. 57.0 mg (80% yield).  $^1\text{H}$  NMR (400 MHz,  $\text{CDCl}_3$ )  $\delta$  7.49 – 7.45 (m, 4H), 7.40 – 7.26 (m, 6H), 7.17 – 7.08 (m, 3H), 6.84 – 6.83 (m, 2H), 5.44 (s, 1H), 4.38 (dd,  $J = 15.0, 1.2$  Hz, 1H), 4.05 (d,  $J = 15.0$  Hz, 1H), 3.92 (dd,  $J = 8.4, 5.4$  Hz, 1H), 3.75 (dd,  $J = 8.4, 1.2$  Hz, 1H), 3.16 – 3.10 (m, 1H), 1.23 (d,  $J = 7.0$  Hz, 3H).  $^{13}\text{C}$  NMR (101 MHz,  $\text{CDCl}_3$ )  $\delta$  161.9, 142.3, 136.0, 136.0, 133.4, 133.0, 129.9, 129.8, 128.3, 128.2, 128.1, 128.0, 128.0,



126.1, 75.7, 70.7, 38.8, 20.7. HRMS (ESI, m/z): calcd for C<sub>24</sub>H<sub>24</sub>NaOSi<sup>+</sup> [M + Na]<sup>+</sup>: 379.1489, found 379.1470.

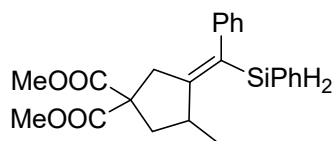

**4aa**, General procedure **B**, colorless oil. 55.2 mg (70% yield). <sup>1</sup>H NMR (400 MHz, CDCl<sub>3</sub>) δ 7.44 (dd, *J* = 7.8, 1.4 Hz, 2H), 7.36 – 7.32 (m, 1H), 7.30 – 7.26 (m, 2H), 7.25 – 7.22 (m, 2H), 7.16 – 7.12 (m, 1H), 6.99 – 6.97 (m, 2H), 4.73 (dd, *J* = 15.6, 6.2 Hz, 2H), 3.70 (s, 3H), 3.65 (s, 3H), 3.016 – 3.00 (m, 1H), 3.02 (d, *J* = 17.0 Hz, 1H), 2.77 – 2.71 (m, 2H), 2.01 (dd, *J* = 13.4, 4.8 Hz, 1H), 1.19 (d, *J* = 7.2 Hz, 3H). <sup>13</sup>C NMR (101 MHz, CDCl<sub>3</sub>) δ 172.5, 172.2, 161.7, 143.7, 135.6, 129.7, 128.8, 128.5, 128.3, 128.1, 126.1, 59.1, 52.9, 52.8, 41.4, 40.1, 37.9, 22.9. HRMS (ESI, m/z): calcd for C<sub>23</sub>H<sub>26</sub>NaO<sub>4</sub>Si<sup>+</sup> [M + Na]<sup>+</sup>: 417.1493, found 417.1476.

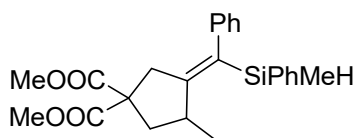

**4ab**, General procedure **B**, colorless oil. 73.5 mg (90% yield) dr = 7: 1. <sup>1</sup>H NMR (400 MHz, CDCl<sub>3</sub>) δ major : 7.47 – 7.45 (m, 2H), 7.39 – 7.30 (m, 3H), 7.15 – 7.11 (m, 2H), 7.15 – 7.11 (m, 1H), 6.82 – 6.80 (m, 2H), 4.93 (q, *J* = 3.8 Hz, 1H), 3.70 (s, 3H), 3.64 (s, 3H), 3.14 – 3.08 (m, 1H), 2.97 (dd, *J* = 16.8, 1.6 Hz, 1H), 2.72 – 2.63 (m, 2H), 2.01 (dd, *J* = 13.4, 4.4 Hz, 1H), 1.21 (d, *J* = 7.0 Hz, 3H), 0.23 (d, *J* = 3.8 Hz, 3H). δ minor : 6.90 – 6.88 (m, 2H), 4.89 (q, *J* = 3.8 Hz, 1H), 2.91 (dd, *J* = 16.8, 1.6 Hz, 1H), 1.14 (d, *J* = 7.0 Hz, 3H), 0.29 (d, *J* = 3.8 Hz, 3H). <sup>13</sup>C NMR (101 MHz, CDCl<sub>3</sub>) δ 172.7, 172.3, 160.0, 143.3, 135.6, 134.8, 132.0, 129.4, 128.2, 128.0, 125.7, 58.9, 52.9, 52.8, 41.3, 39.9, 37.4, 22.8, -5.3. HRMS (ESI, m/z): calcd for C<sub>24</sub>H<sub>28</sub>NaO<sub>4</sub>Si<sup>+</sup> [M + Na]<sup>+</sup>: 431.1649, found 431.1659.

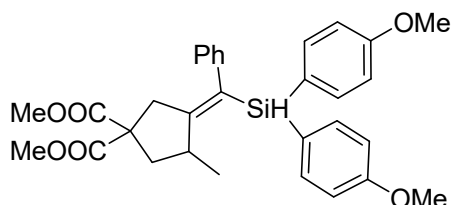

**4ac**, General procedure **B**, 10 mmol% Ni catalysis 80 °C, yellow oil. 57.3 mg (54% yield). <sup>1</sup>H NMR (400 MHz, CDCl<sub>3</sub>) δ 7.36 – 7.32 (m, 4H), 7.16 – 7.06 (m, 3H), 6.88 – 6.79 (m, 6H), 5.38 (s, 1H), 3.81 (s, 3H), 3.79 (s, 3H), 3.71 (s, 3H), 3.68 (s, 3H), 3.27 – 3.14 (m, 1H), 3.03 (d, *J* = 20.0 Hz, 1H), 2.79 – 2.70 (m, 2H), 2.03 (dd, *J* = 13.4, 4.4 Hz, 1H), 1.16 (d, *J* = 7.0 Hz, 3H). <sup>13</sup>C NMR (101 MHz, CDCl<sub>3</sub>) δ 172.7, 172.4, 161.0, 160.9, 143.3, 137.5, 137.4, 131.3, 128.7, 128.1, 125.7, 124.7, 124.2, 113.8, 113.7, 58.8, 55.1, 55.1, 52.8, 52.7, 41.4, 40.1, 37.4, 23.1. HRMS (ESI, *m/z*): calcd for C<sub>31</sub>H<sub>34</sub>NaO<sub>6</sub>Si<sup>+</sup> [*M* + Na]<sup>+</sup>: 553.2017, found 553.2019.

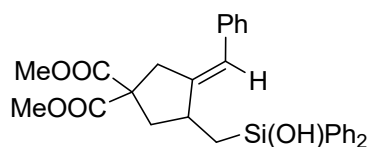

**5a**, General procedure **C**, colorless oil. 58.4 mg (60% yield). <sup>1</sup>H NMR (400 MHz, CDCl<sub>3</sub>) δ 7.67 – 7.63 (m, 4H), 7.43 – 7.37 (m, 6H), 7.33 – 7.30 (m, 3H), 7.18 (t, *J* = 7.2 Hz, 2H), 6.30 (d, *J* = 2.2 Hz, 1H), 3.69 (s, 3H), 3.62 (s, 3H), 3.33 (d, *J* = 17.6 Hz, 1H), 3.15 (dt, *J* = 17.6, 2.4 Hz, 1H), 2.91 – 2.78 (m, 1H), 2.59 (dd, *J* = 12.8, 7.2 Hz, 2H), 1.88 (dd, *J* = 12.8, 11.0 Hz, 1H), 1.72 (dd, *J* = 15.0, 4.0 Hz, 1H), 1.35 – 1.25 (m, 1H). <sup>13</sup>C NMR (101 MHz, CDCl<sub>3</sub>) δ 172.5, 172.3, 147.1, 137.9, 136.7, 136.0, 134.3, 134.3, 130.1, 130.1, 128.5, 128.4, 128.2, 126.4, 121.8, 59.3, 53.0, 52.9, 41.2, 40.4, 38.6, 20.1. HRMS (ESI, *m/z*): calcd for C<sub>29</sub>H<sub>30</sub>NaO<sub>5</sub>Si<sup>+</sup> [*M* + Na]<sup>+</sup>: 509.1755, found 509.1759.

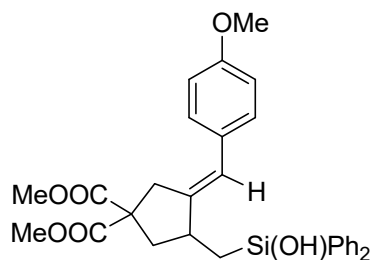

**5b**, General procedure **C**, yellow oil. 53.6 mg (52% yield). <sup>1</sup>H NMR (400 MHz, CDCl<sub>3</sub>) δ 7.67 – 7.64 (m, 4H), 7.43 – 7.37 (m, 6H), 7.19 (d, *J* = 8.7 Hz, 2H), 6.86 (d, *J* = 8.7 Hz, 2H), 6.28 – 6.26 (m, 1H), 3.80 (s, 3H), 3.69 (s, 3H), 3.61 (s, 3H), 3.31 (d, *J* = 17.5 Hz, 1H), 3.13 (dt, *J* = 17.5, 2.3 Hz, 1H), 2.93 – 2.70 (m, 2H), 2.59 (dd, *J* = 12.8, 7.1 Hz, 1H), 1.87 (dd, *J* = 12.7, 11.1 Hz, 1H), 1.71 (dd, *J* = 15.0, 3.9 Hz, 1H), 1.30– 1.24 (m, 1H). <sup>13</sup>C NMR (101 MHz, CDCl<sub>3</sub>) δ 172.5, 172.3, 158.2, 144.9, 136.7, 136.1, 134.3,

134.23, 130.7, 130.1, 130.0, 129.6, 128.1, 121.1, 113.9, 59.3, 55.4, 52.9, 52.9, 41.8, 40.2, 38.5, 20.1.

HRMS (ESI, m/z): calcd for  $C_{30}H_{32}NaO_6Si^+$   $[M + Na]^+$ : 539.1860, found 539.1837.

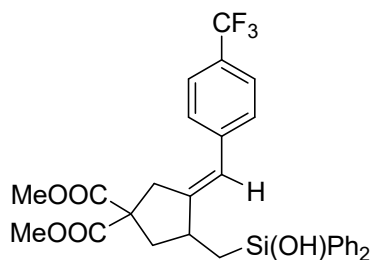

**5c**, General procedure C, yellow oil. 48.8 mg (44% yield).  $^1H$  NMR (400 MHz,  $CDCl_3$ )  $\delta$  7.67 – 7.64 (m, 4H), 7.56 (d,  $J = 8.2$  Hz, 2H), 7.44 – 7.38 (m, 6H), 7.33 (d,  $J = 8.1$  Hz, 2H), 6.35 – 6.30 (m, 1H), 3.70 (s, 3H), 3.62 (s, 3H), 3.31 (d,  $J = 17.6$  Hz, 1H), 3.13 (d,  $J = 17.6$  Hz, 1H), 2.93 – 2.81 (m, 1H), 2.71 – 2.52 (m, 2H), 1.95 – 1.86 (m, 1H), 1.71 (dd,  $J = 15.0, 3.8$  Hz, 1H), 1.29 (dd,  $J = 15.0, 10.6$  Hz, 1H).  $^{13}C$  NMR (101 MHz,  $CDCl_3$ )  $\delta$  172.3, 172.1, 150.1, 141.4, 136.5, 135.9, 134.3, 134.2, 130.2, 130.2, 128.6, 128.3 (q,  $J = 32.4$  Hz), 128.2, 125.3 (q,  $J = 3.6$  Hz), 124.4 (q,  $J = 271.8$  Hz), 120.8, 59.2, 53.0, 53.0, 41.1, 40.6, 38.7, 20.1.  $^{19}F$  NMR (377 MHz,  $CDCl_3$ )  $\delta$  -62.4 (s, 3F). HRMS (ESI, m/z): calcd for  $C_{30}H_{29}F_3NaO_5Si^+$   $[M + Na]^+$ : 577.1629, found 577.1610.

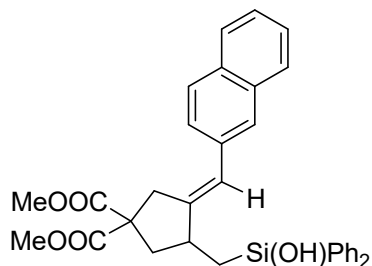

**5d**, General procedure C, yellow oil. 51.3 mg (48% yield).  $^1H$  NMR (400 MHz,  $CDCl_3$ )  $\delta$  7.83 – 7.78 (m, 3H), 7.71 – 7.67 (m, 5H), 7.47 – 7.39 (m, 9H), 6.51 – 6.45 (m, 1H), 3.70 (s, 3H), 3.63 (s, 3H), 3.46 (d,  $J = 17.6$  Hz, 2H), 3.26 (dt,  $J = 17.6, 2.4$  Hz, 2H), 2.99 – 2.76 (m, 2H), 2.66 (dd,  $J = 12.8, 7.2$  Hz, 1H), 1.94 (dd,  $J = 12.8, 11.0$  Hz, 1H), 1.79 (dd,  $J = 15.0, 4.0$  Hz, 1H), 1.38 – 1.29 (m, 1H).  $^{13}C$  NMR (101 MHz,  $CDCl_3$ )  $\delta$  172.5, 172.3, 147.7, 136.7, 136.1, 135.5, 134.3, 134.3, 133.6, 132.2, 130.1, 130.1, 128.1, 128.1, 127.8, 127.7, 127.1, 126.2, 125.7, 121.9, 59.3, 53.0, 52.9, 41.2, 40.5, 38.7, 20.1. HRMS (ESI, m/z): calcd for  $C_{33}H_{32}NaO_5Si^+$   $[M + Na]^+$ : 559.1911, found 559.1891

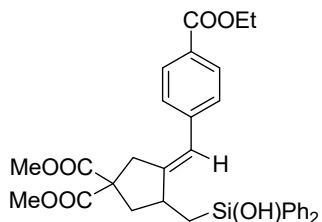

**5e**, General procedure C, yellow oil. 43.6 mg (40% yield).  $^1\text{H}$  NMR (400 MHz,  $\text{CDCl}_3$ )  $\delta$  7.98 (d,  $J$  = 8.2 Hz, 2H), 7.58 (d,  $J$  = 6.4 Hz, 4H), 7.42 – 7.36 (m, 8H), 6.32 (s, 1H), 4.37 (q,  $J$  = 7.2 Hz, 2H), 3.65 (s, 3H), 3.60 (s, 3H), 3.32 (d,  $J$  = 17.6 Hz, 1H), 3.09 (d,  $J$  = 17.6 Hz, 1H), 2.93 – 2.79 (m, 1H), 2.32 (dd,  $J$  = 13.0, 6.8 Hz, 1H), 2.00 (dd,  $J$  = 15.0, 3.4 Hz, 1H), 1.69 (t,  $J$  = 12.3 Hz, 1H), 1.39 (t,  $J$  = 7.2 Hz, 3H).  $^{13}\text{C}$  NMR (101 MHz,  $\text{CDCl}_3$ )  $\delta$  172.4, 172.2, 166.8, 162.3, 148.4, 135.9, 135.9, 133.1, 132.6, 130.3, 129.9, 129.9, 129.50, 128.7, 128.1, 128.0, 60.9, 58.8, 52.9, 52.8, 41.3, 40.2, 37.6, 23.0, 14.4. HRMS (ESI,  $m/z$ ): calcd for  $\text{C}_{30}\text{H}_{32}\text{NaO}_6\text{Si}^+$  [ $\text{M} + \text{Na}$ ] $^+$ : 539.1860, found 539.1837.

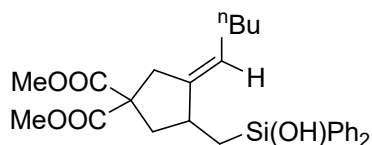

**5f**, General procedure C, yellow oil. 42.5mg (46% yield).  $^1\text{H}$  NMR (400 MHz,  $\text{CDCl}_3$ )  $\delta$  7.66 – 7.57 (m, 4H), 7.45 – 7.33 (m, 6H), 5.26 – 5.17 (m, 1H), 3.69 (s, 3H), 3.62 (s, 3H), 2.96 (d,  $J$  = 16.8 Hz, 1H), 2.88 – 2.74 (m, 1H), 2.62 – 2.47 (m, 2H), 2.01 – 1.91 (m, 1H), 1.80 (t,  $J$  = 10.8 Hz, 1H), 1.58 (d,  $J$  = 15.0 Hz, 1H), 1.37 – 1.23 (m, 5H), 1.15 – 1.09 (m, 1H),  $\delta$  0.87 (t,  $J$  = 11.2 Hz, 3H).  $^{13}\text{C}$  NMR (101 MHz,  $\text{CDCl}_3$ )  $\delta$  172.7, 172.5, 143.9, 136.8, 136.2, 134.3, 134.2, 130.0, 130.0, 128.1, 121.5, 58.6, 52.8, 52.8, 42.1, 38.4, 36.9, 31.8, 29.0, 22.5, 19.7, 14.1. HRMS (ESI,  $m/z$ ): calcd for  $\text{C}_{27}\text{H}_{34}\text{NaO}_5\text{Si}^+$  [ $\text{M} + \text{Na}$ ] $^+$ : 489.2068, found 489.2058.

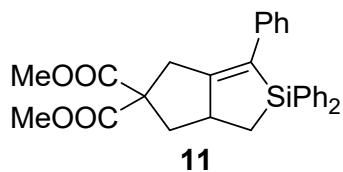

**11**, General procedure B, yellow oil.  $^1\text{H}$  NMR (400 MHz,  $\text{CDCl}_3$ )  $\delta$  7.57 – 7.50 (m, 4H), 7.43 – 7.31 (m, 6H), 7.22 – 7.18 (m, 2H), 7.14 – 7.11 (m, 2H), 3.78 (s, 3H), 3.73 (s, 3H), 3.40 (d,  $J$  = 18.6 Hz, 1H), 3.20 – 3.08 (m, 2H), 2.79 (dd,  $J$  = 12.8, 7.2 Hz, 1H), 1.89 (t,  $J$  = 12.6 Hz, 1H), 1.65 (dd,  $J$  = 14.6, 7.4 Hz, 1H),

1.10 (dd,  $J = 14.6, 8.0$  Hz, 1H).  $^{13}\text{C}$  NMR (101 MHz,  $\text{CDCl}_3$ )  $\delta$  172.8, 172.3, 164.9, 139.8, 136.4, 135.4, 135.2, 135.2, 132.1, 129.9, 129.7, 128.5, 128.4, 128.2, 128.1, 126.1, 60.8, 53.1, 53.0, 47.7, 42.2, 36.8, 16.8. HRMS (ESI,  $m/z$ ): calcd for  $\text{C}_{29}\text{H}_{28}\text{NaO}_4\text{Si}^+$  [ $\text{M} + \text{Na}$ ] $^+$ : 491.1649, found 491.1652.

## 4. Large-scale Synthesis

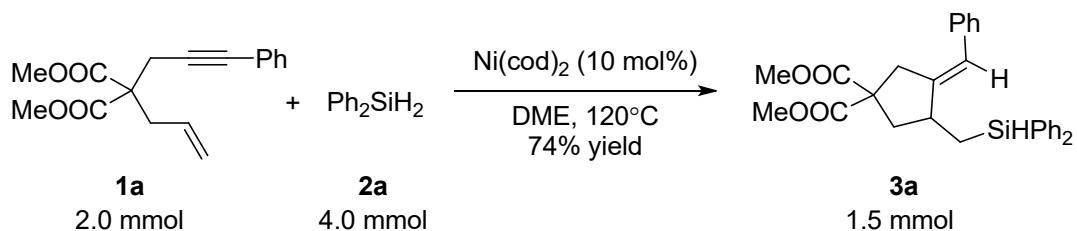

The mixture of **1a** (2.0 mmol, 1.0 equiv), diphenylsilane **2a** (4.0 mmol, 1 equiv),  $\text{Ni}(\text{cod})_2$  (10 mol %) in DME (20.0 mL) was stirred at  $120^\circ\text{C}$  in the oil bath for 30 h under argon atmosphere. The reaction vial was removed from the oil bath and cooled to ambient temperature. The reaction mixture was filtered through a pad of celite. The mixture was eluted with ethyl acetate, concentrated, and purified by silica gel chromatography (PE : Dioxane = 10:1) to give the indicated product **3a** (696mg, 74% yield).

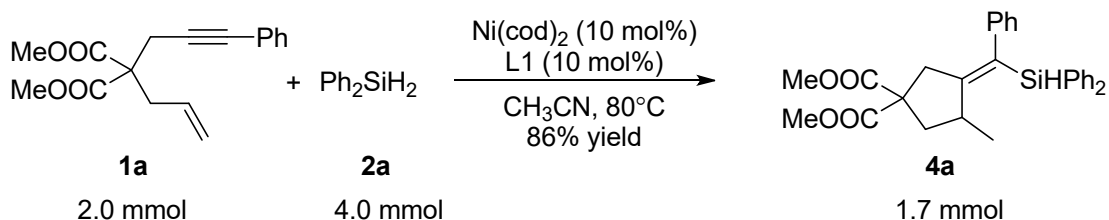

The mixture of **1a** (2 mmol, 1.0 equiv), diphenylsilane **2a** (4 mmol, 1 equiv),  $\text{Ni}(\text{cod})_2$  (10 mol %) and L1 (10 mol %) in  $\text{CH}_3\text{CN}$  (20.0 mL) was stirred at  $80^\circ\text{C}$  in the oil bath for 30 h under argon atmosphere. The reaction vial was removed from the oil bath and cooled to ambient temperature. The reaction mixture was filtered through a pad of celite. The mixture was eluted with ethyl acetate, concentrated, and purified by silica gel chromatography (PE : Dioxane = 10:1) to give the indicated product **4a** (809mg, 86% yield).

## 5. Derivatization Reactions

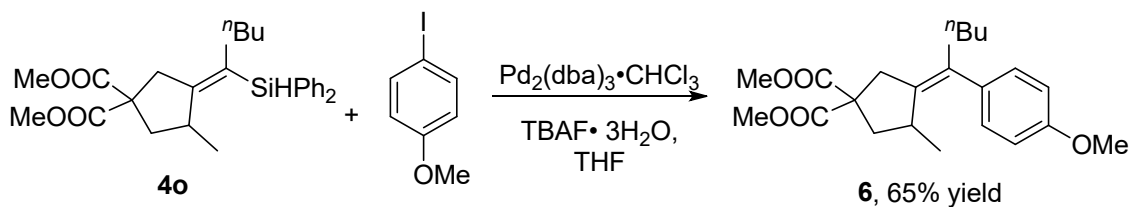

Alkydendylsilane **4o** (90.1 mg, 0.22 mmol, 1.1 equiv) in a 10-mL round-bottomed flask with a magnetic stir bar, then a solution of TBAF·3H<sub>2</sub>O (1.0 M in THF, 0.4 mL, 0.4 mmol, 2.0 equiv) was added and the resulting light-yellow solution was stirred at room temperature under argon for 3 min. Then Methyl 4-iodobenzoate (46.8 mg, 0.2 mmol, 1.0 equiv) and Pd(dba) · CHCl<sub>3</sub>; (5.1 mg, 0.005 mmol, 2.5 mol %) were added to the solution sequentially. The flask was purged with argon, and the reaction mixture was stirred at 35 °C under Ar atmosphere for 24 h.

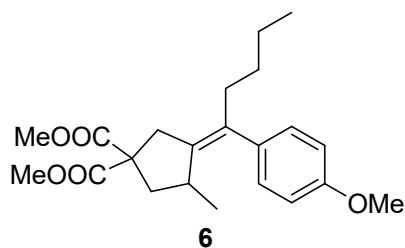

**6**, 57.7 mg (65% yield). <sup>1</sup>H NMR (400 MHz, CDCl<sub>3</sub>) δ 7.02 – 6.98 (m, 2H), 6.84 – 6.81 (m, 2H), 3.80 (s, 3H), 3.75 (s, 3H), 3.74 (s, 3H), 3.09 – 3.00 (m, 2H), 2.85 – 2.76 (m, 1H), 2.57 (ddd, *J* = 13.0, 8.0, 1.0 Hz, 1H), 2.35 – 2.28 (m, 1H), 2.22 – 2.17 (m, 1H), 1.76 (dd, *J* = 13.0, 7.2 Hz, 1H), 1.31 – 1.17 (m, 4H), 0.84 (t, *J* = 6.8 Hz, 3H), 0.61 (d, *J* = 7.0 Hz, 3H). <sup>13</sup>C NMR (101 MHz, CDCl<sub>3</sub>) δ 172.7, 172.5, 158.1, 139.4, 135.2, 134.8, 129.6, 113.6, 59.2, 55.3, 52.8, 52.8, 42.2, 38.6, 36.1, 35.5, 30.0, 22.6, 20.3, 14.2. HRMS (ESI, *m/z*): calcd for C<sub>22</sub>H<sub>30</sub>NaO<sub>5</sub><sup>+</sup> [M + Na]<sup>+</sup>: 397.1985, found 397.1988.

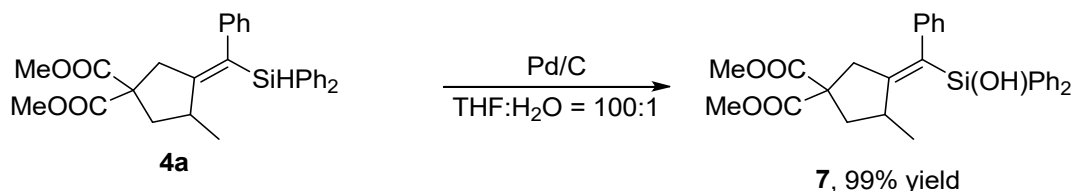

**4a** (84.2 mg, 0.2 mmol) and THF (2.0 mL, containing 1% v/v H<sub>2</sub>O) was added to a flame dried schlenk tube under argon, the Pd/C (15.0 mg, 10 wt%) was added and stirred at room temperature. After the reaction was complete (10 min), DCM (5.0 mL) was added and dried by Na<sub>2</sub>SO<sub>4</sub>, then the reaction

mixture was filtered through a pad of celite, eluted with ethyl acetate, concentrated in vacuo and purified by silica gel chromatography (PE:EA = 10:1) to give the product **7** (97.3 mg, yield 99%).

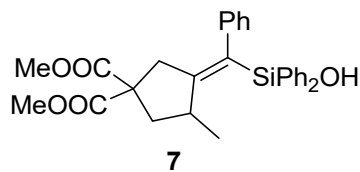

**7**, 97.3 mg (99% yield). <sup>1</sup>H NMR (400 MHz, CDCl<sub>3</sub>) δ 7.62 – 7.59 (m, 4H), 7.44 – 7.33 (m, 6H), 7.23–7.21 (m, 2H), 7.17 – 7.08 (m, 1H), 6.97 (d, *J* = 7.0 Hz, 2H), 3.69 (s, 3H), 3.67 (s, 3H), 3.02 (dd, *J* = 17.0, 1.2 Hz, 1H), 2.87 – 2.80 (m, 1H), 2.69 (d, *J* = 17.0 Hz, 1H), 2.59 (dd, *J* = 13.6, 8.0 Hz, 1H), 2.17 (s, 1H), 1.96 (dd, *J* = 13.6, 3.4 Hz, 1H), 0.76 (d, *J* = 7.0 Hz, 3H). <sup>13</sup>C NMR (101 MHz, CDCl<sub>3</sub>) δ 172.8, 172.6, 161.8, 143.1, 136.2, 135.5, 135.3, 135.1, 131.8, 130.1, 130.1, 128.7, 128.5, 127.9, 127.9, 125.9, 58.0, 52.9, 52.8, 41.1, 39.7, 37.7, 22.1. HRMS (ESI, *m/z*): calcd for C<sub>29</sub>H<sub>30</sub>NaO<sub>5</sub>Si<sup>+</sup> [M + Na]<sup>+</sup>: 509.1755, found 509.1758.

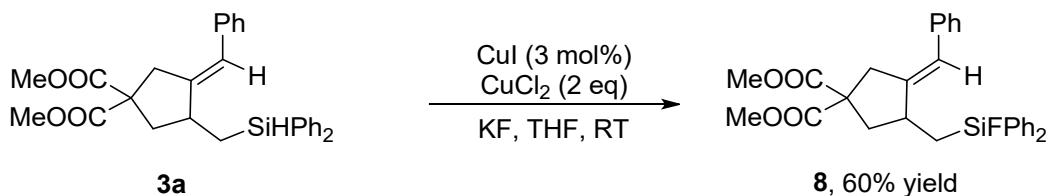

**3a** (0.10 mmol, 42.5 mg), CuCl<sub>2</sub> (27.1 mg, 0.2 mmol, 2.0 equiv), CuI (1.6 mg, 0.009 mmol, 9 mol%), KF (7.1 mg, 0.12 mmol, 1.2 equiv.) and 1.0 mL (1.0 M) of THF was charged in THF and stirred for 12 h at room temperature. After 12 h, the resulting solution was added 5 mL of EA and filtered through a pad of silica gel. The combined filtrates were concentrated and purified by flash column chromatography using EA/Hexane (1:10) as the eluent to give product as a colorless oil.

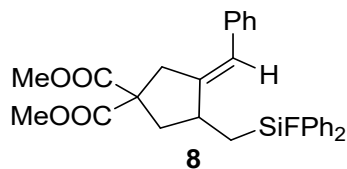

**8**, 31.2 mg (60% yield), <sup>1</sup>H NMR (400 MHz, CDCl<sub>3</sub>) δ 7.67 – 7.63 (m, 4H), 7.47 – 7.41 (m, 6H), 7.33 – 7.29 (m, 2H), 7.25 – 7.23 (m, 2H), 7.18 (dd, *J* = 9.0, 6.2 Hz, 1H), 6.28 (d, *J* = 2.6 Hz, 1H), 3.69 (s, 3H),



3.60 (s, 3H), 3.32 (d,  $J = 17.6$  Hz, 1H), 3.14-3.12 (m, 1H), 2.93 – 2.79 (m, 1H), 2.68 – 2.53 (m, 1H), 1.90 – 1.81 (m, 1H), 1.74 (ddd,  $J = 18.8, 10.8, 3.6$  Hz, 1H), 1.43 – 1.23 (m, 1H).  $^{13}\text{C}$  NMR (101 MHz,  $\text{CDCl}_3$ )  $\delta$  172.5, 172.3, 147.1, 137.9, 136.7, 136.1, 134.3, 134.2, 130.1, 130.1, 128.5, 128.4, 128.1, 126.4, 121.8, 59.2, 52.9, 52.9, 41.2, 40.3, 38.6, 20.1.  $^{19}\text{F}$  NMR (377 MHz,  $\text{CDCl}_3$ )  $\delta$  -169.00 (s, 1F). HRMS (ESI,  $m/z$ ): calcd for  $\text{C}_{29}\text{H}_{29}\text{FNaO}_4\text{Si}^+$  [ $\text{M} + \text{Na}$ ] $^+$ : 511.1711, found 511.1715.

## 6. Mechanistic Studies

### a) Radical-probe experiments

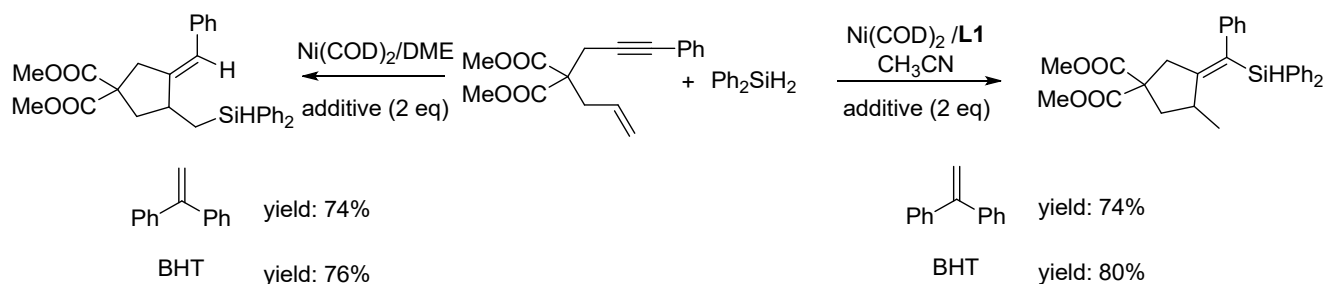

Condition A:  $\text{Ni}(\text{cod})_2$  (5.6 mg, 0.002 mmol) and diphenylsilane **2a** (0.4 mmol, 1 equiv), in DME (2 mL) were charged into a 25 mL pressure tube under argon. The mixture was stirred for 30 min at room temperature, followed **1a** (0.2 mmol, 1.0 equiv) and ethene-1,1-diyldibenzene (0.60 mmol) or BHT (0.6 mmol). The reaction tube was then sealed and placed in an oil bath at 120 °C. After the reaction was complete (24 h), the reaction mixture was filtered through a pad of celite, eluted with ethyl acetate, concentrated, and purified by silica gel chromatography (PE:Dioxane = 10:1) to give the indicated product **3a** (69.6 mg, yield 74% with ethene-1,1-diyldibenzene) or (71.5 mg, yield 76% with BHT).

Condition B:  $\text{Ni}(\text{cod})_2$  (1.4 mg, 0.002 mmol) and  $\text{IPr} \cdot \text{HCl}$  (8.5 mg, 0.02 mmol) and  $\text{CH}_3\text{COOCs}$  (7.6 mg, 0.04 mmol) in  $\text{CH}_3\text{CN}$  (2.0 mL) were charged into a pressure tube under argon. The mixture was stirred for 30 min at room temperature, followed by addition of diphenylsilane (0.4 mmol, 2.0 equiv) and then stirred for 30 min at room temperature, followed by addition of **1a** (0.2 mmol, 1.0 equiv) and ethene-1,1-diyldibenzene (0.6 mmol) or BHT (0.6 mmol). The reaction tube was then sealed and placed in an oil bath at 80 °C. After the reaction was complete (24 h), the reaction mixture was filtered through a pad of celite, eluted with ethyl acetate, concentrated, and purified by silica gel chromatography (PE:Dioxane = 10:1) to give the indicated product **4a** (66.8 mg, yield 71%) or (75.3 mg, yield 80%).

b) Deuterium labeling experiments

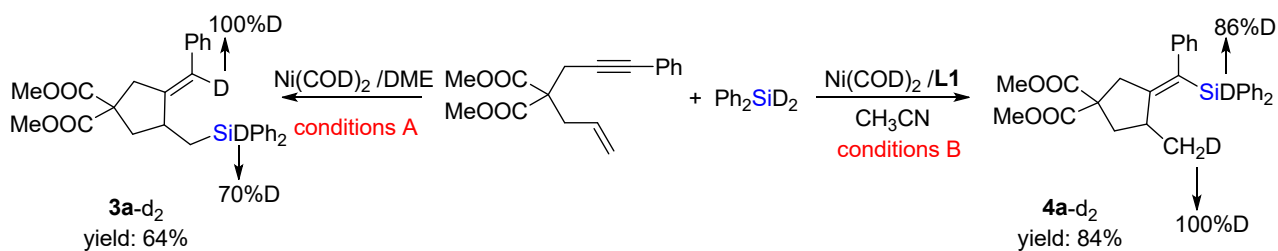

Co

Condition A:  $\text{Ni}(\text{cod})_2$  (5.6 mg, 0.02 mmol) and  $\text{Ph}_2\text{SiD}_2$  (0.4 mmol, 1 equiv), in DME (2 mL) were charged into a 25 mL pressure tube under argon. The mixture was stirred for 30 min at room temperature, followed by **1a** (0.2 mmol, 1.0 equiv). The reaction tube was then sealed and placed in an oil bath at 120 °C. After the reaction was complete (24 h), the reaction mixture was filtered through a pad of celite, eluted with ethyl acetate, concentrated, and purified by silica gel chromatography (PE:Dioxane = 10:1) to give the indicated product **3a-d<sub>2</sub>** (66.1 mg, yield 70%). **3a-d<sub>2</sub>**:  $^1\text{H NMR}$  (400 MHz,  $\text{CDCl}_3$ )  $\delta$  7.62 – 7.58 (m, 4H), 7.41 – 7.35 (m, 6H), 7.34 – 7.30 (m, 2H), 7.25 (d,  $J = 6.5$  Hz, 2H), 7.20 – 7.17 (m, 1H), 5.01 (dd,  $J = 5.4, 2.6$  Hz, 0.3H), 3.71 (s, 3H), 3.62 (s, 3H), 3.35 (d,  $J = 17.5$  Hz, 1H), 3.15 (dd,  $J = 17.6, 2.3$  Hz, 1H), 2.81 – 2.74 (m, 1H), 2.65 (dd,  $J = 12.2, 6.5$  Hz, 1H), 1.87 – 1.81 (m, 1H), 1.78 – 1.72 (m, 1H), 1.27–1.25 (m, 1H).

Condition B:  $\text{Ni}(\text{cod})_2$  (5.6 mg, 0.02 mmol) and  $\text{IPr} \cdot \text{HCl}$  (8.5 mg, 0.02 mmol) and  $\text{CH}_3\text{COOCs}$  (7.6 mg,

0.04 mmol) in  $\text{CH}_3\text{CN}$  (2.0 mL) were charged into a pressure tube under argon. The mixture was stirred for 30 min at room temperature, followed by addition of  $\text{Ph}_2\text{SiD}_2$  (0.4 mmol, 2.0 equiv) and then stirred for 30 min at room temperature, followed by addition of **1a** (0.2 mmol, 1.0 equiv). The reaction tube was then sealed and placed in an oil bath at 80 °C. After the reaction was complete (24 h), the reaction mixture was filtered through a pad of celite, eluted with ethyl acetate, concentrated, and purified by silica gel chromatography (PE:Dioxane = 10:1) to give the indicated product **4a-d<sub>2</sub>** (79.3 mg, yield 84%). **4a-d<sub>2</sub>**:  $^1\text{H NMR}$  (400 MHz,  $\text{CDCl}_3$ )  $\delta$  7.43 (td,  $J = 8.1, 1.3$  Hz, 3H), 7.38 – 7.35 (m, 2H), 7.30 (ddd,  $J = 16.0, 6.0, 1.7$  Hz, 3H), 6.81 – 6.79 (m, 2H), 5.42 (s, 0.14H), 3.71 (s, 3H), 3.68 (s, 3H), 3.20 – 3.17 (m, 1H), 3.06 – 3.01 (m, 1H), 2.79 – 2.71 (m, 2H), 2.04 (dd,  $J = 13.6, 4.6$  Hz, 1H), 1.14 (d,  $J = 7.2$  Hz, 2H).

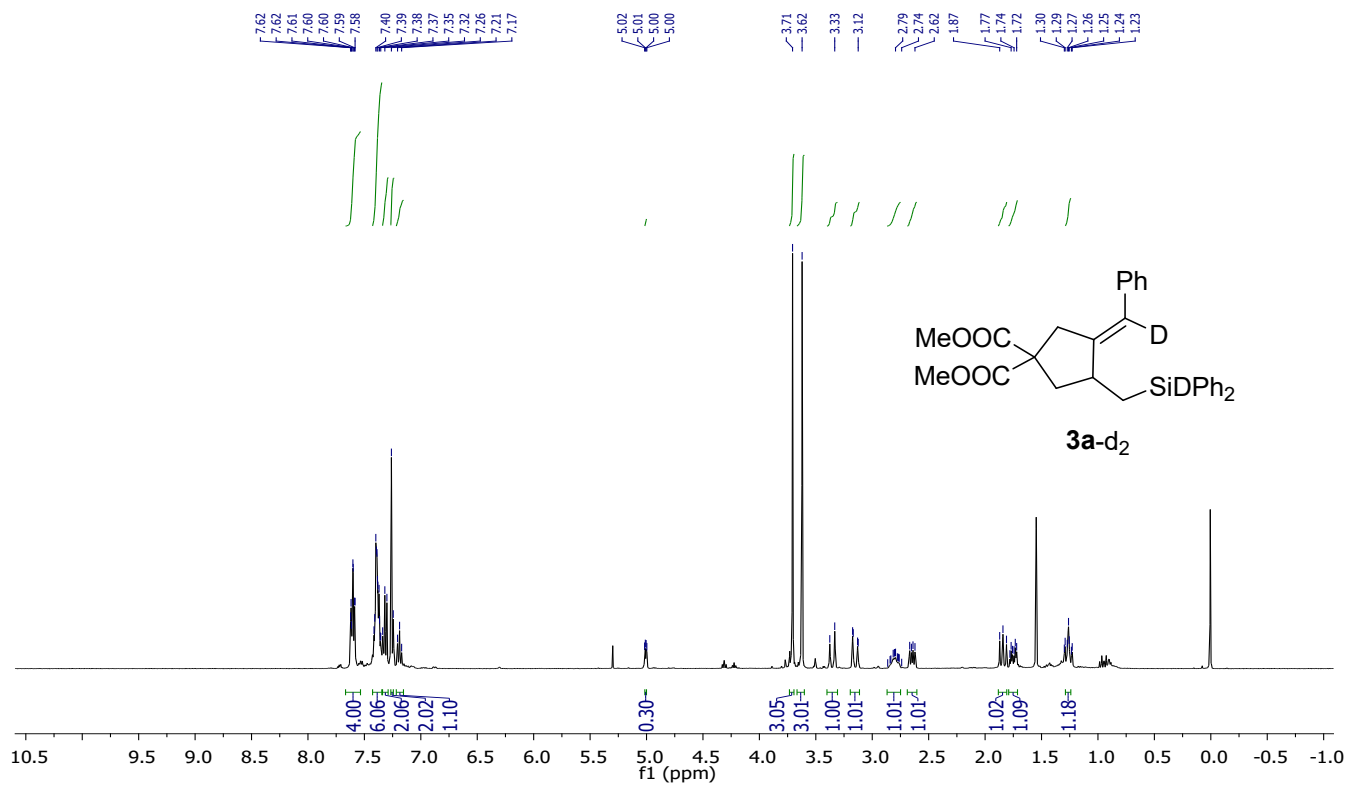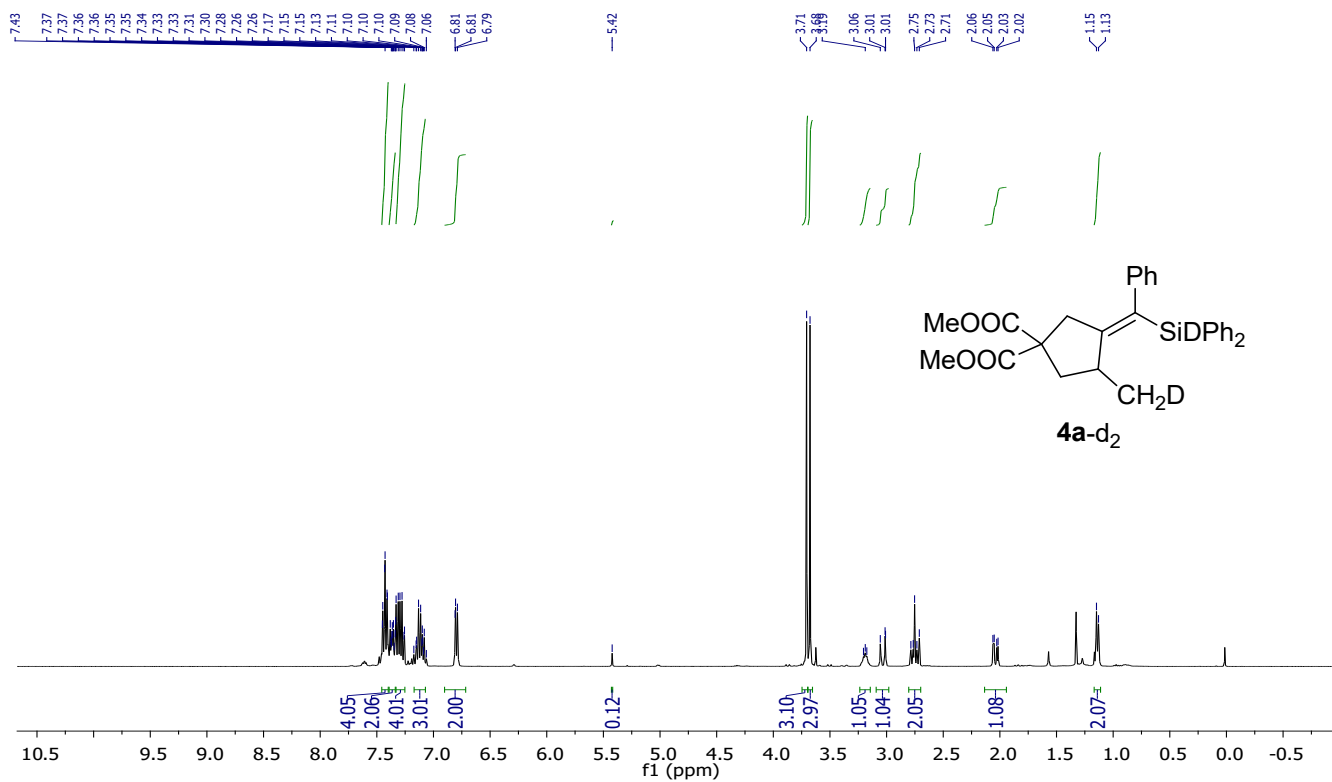

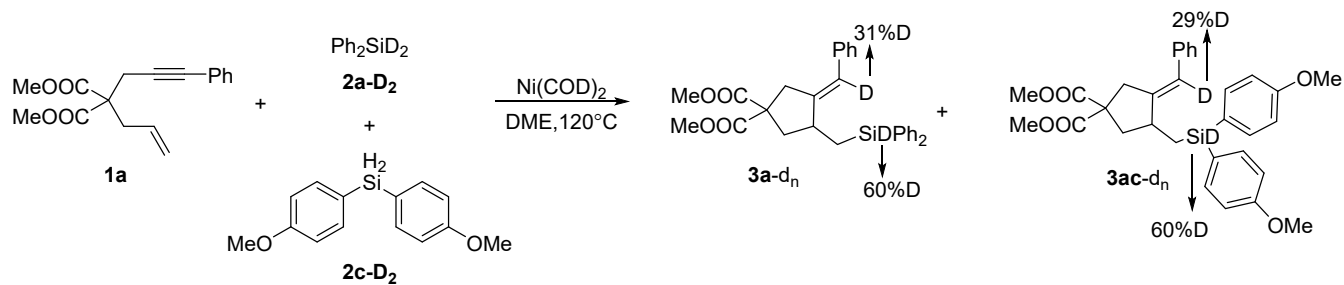

$\text{Ni}(\text{cod})_2$  (5.6 mg, 0.01 mmol) and **2a-D<sub>2</sub>** (36.8mg, 0.2 mmol) and **2c-D<sub>2</sub>** (48.8mg, 0.2 mmol) in  $\text{CH}_3\text{CN}$  (2 mL) were charged into a pressure tube under argon. The mixture was stirred for 30 min at room temperature. Then **1a** (0.2 mmol, 1.0 equiv.) were added sequentially to the reaction mixture. The reaction tube was then sealed and placed in an oil bath at  $120^\circ\text{C}$ . After the reaction was complete (24 h), the reaction mixture was filtered through a pad of celite, eluted with ethyl acetate, concentrated, and purified by silica gel chromatography (PE : EA = 8:1) to give the indicated product **3a-d<sub>n</sub>** . and **3ac-d<sub>n</sub>**.

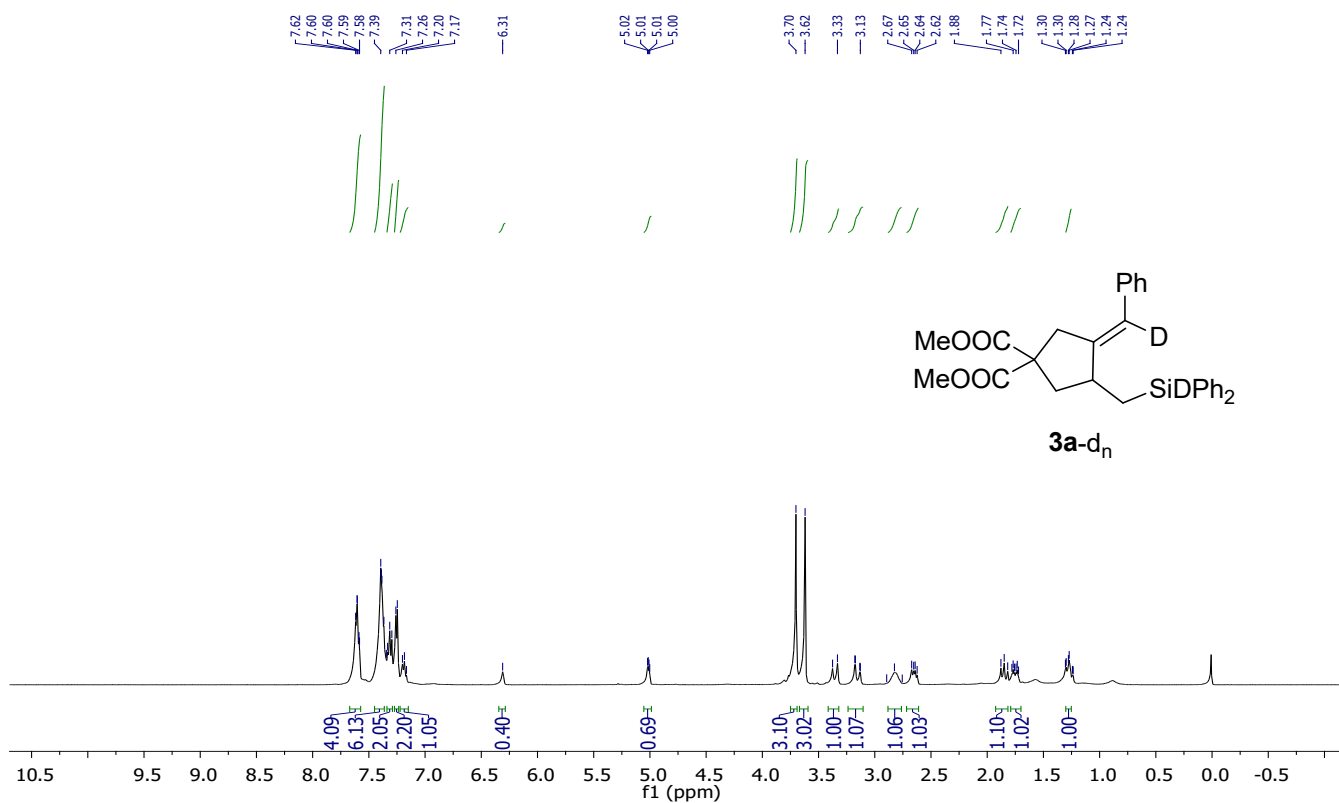

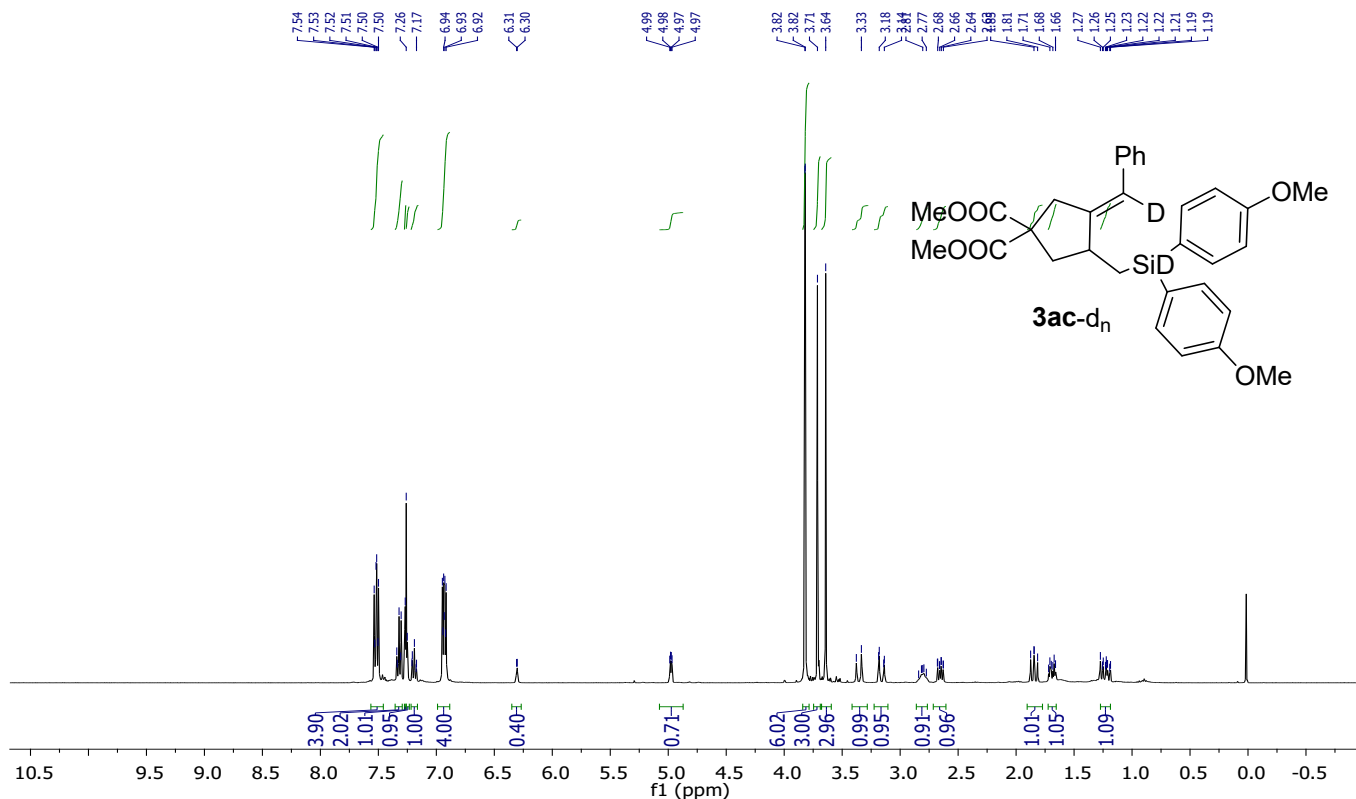

c) H/D exchange experiments

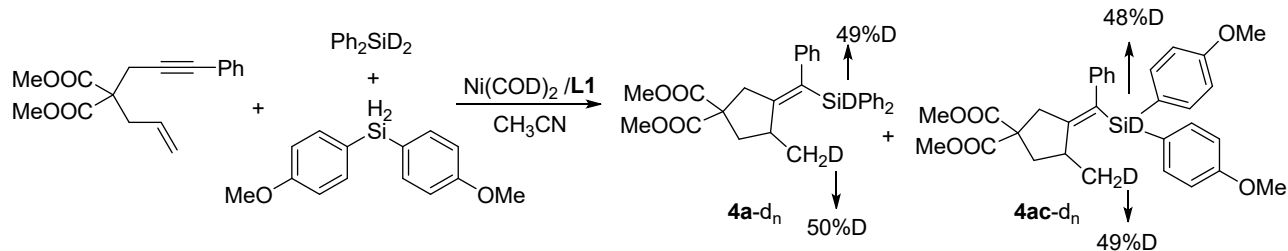

$\text{Ni}(\text{cod})_2$  (5.6 mg, 0.01 mmol) and L1 (8.5 mg, 0.01 mmol) in  $\text{CH}_3\text{CN}$  (2 mL) were charged into a pressure tube under argon. The mixture was stirred for 30 min at room temperature, followed by addition of **2a-D** (36.8mg, 0.2 mmol) and **2c-D2** (48.8mg, 0.2 mmol) was added and stirred for 30 min. Then **1a** (0.2 mmol, 1.0 equiv.) were added sequentially to the reaction mixture. The reaction tube was then sealed and placed in an oil bath at 80 °C. After the reaction was complete (24 h), the reaction mixture was filtered through a pad of celite, eluted with ethyl acetate, concentrated, and purified by silica gel chromatography (PE : EA = 8:1) to give the indicated product **4a-d<sub>n</sub>** and **4ac-d<sub>n</sub>**.

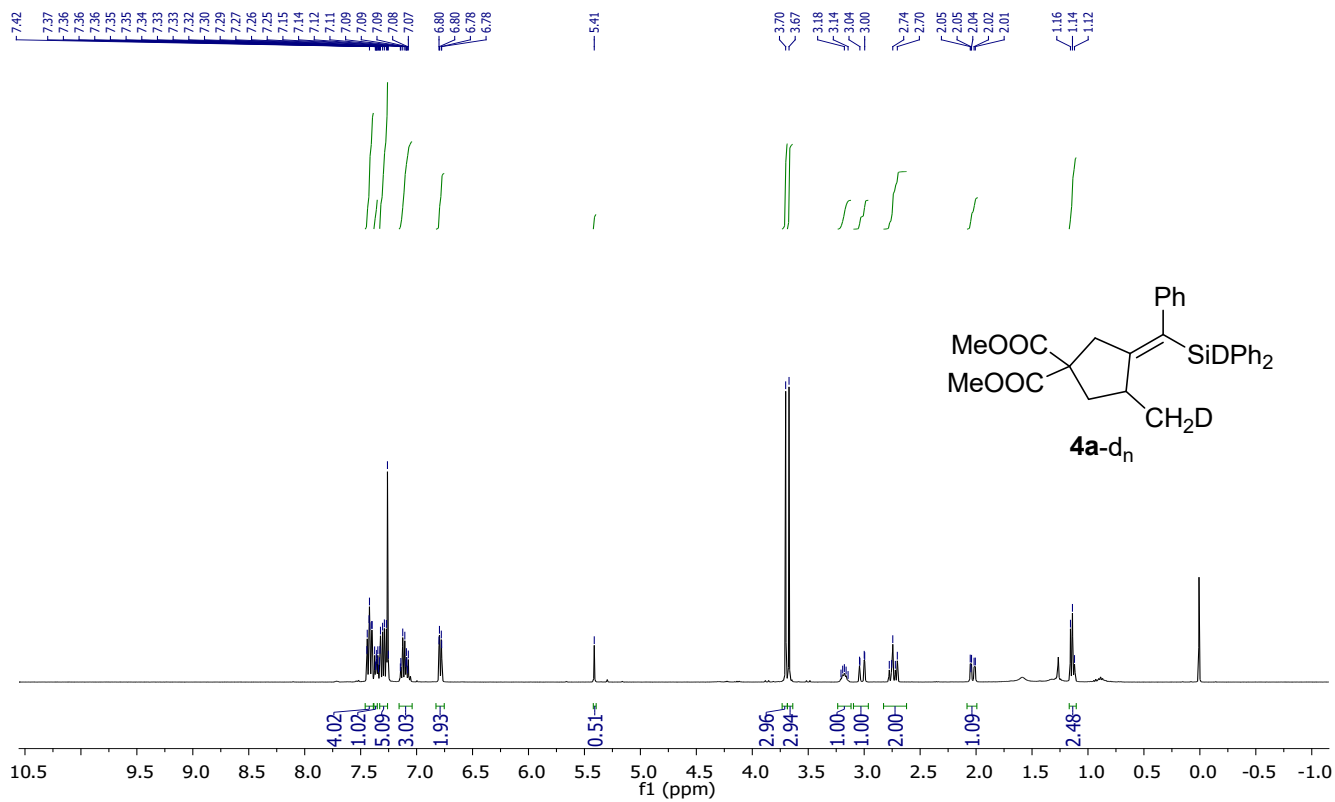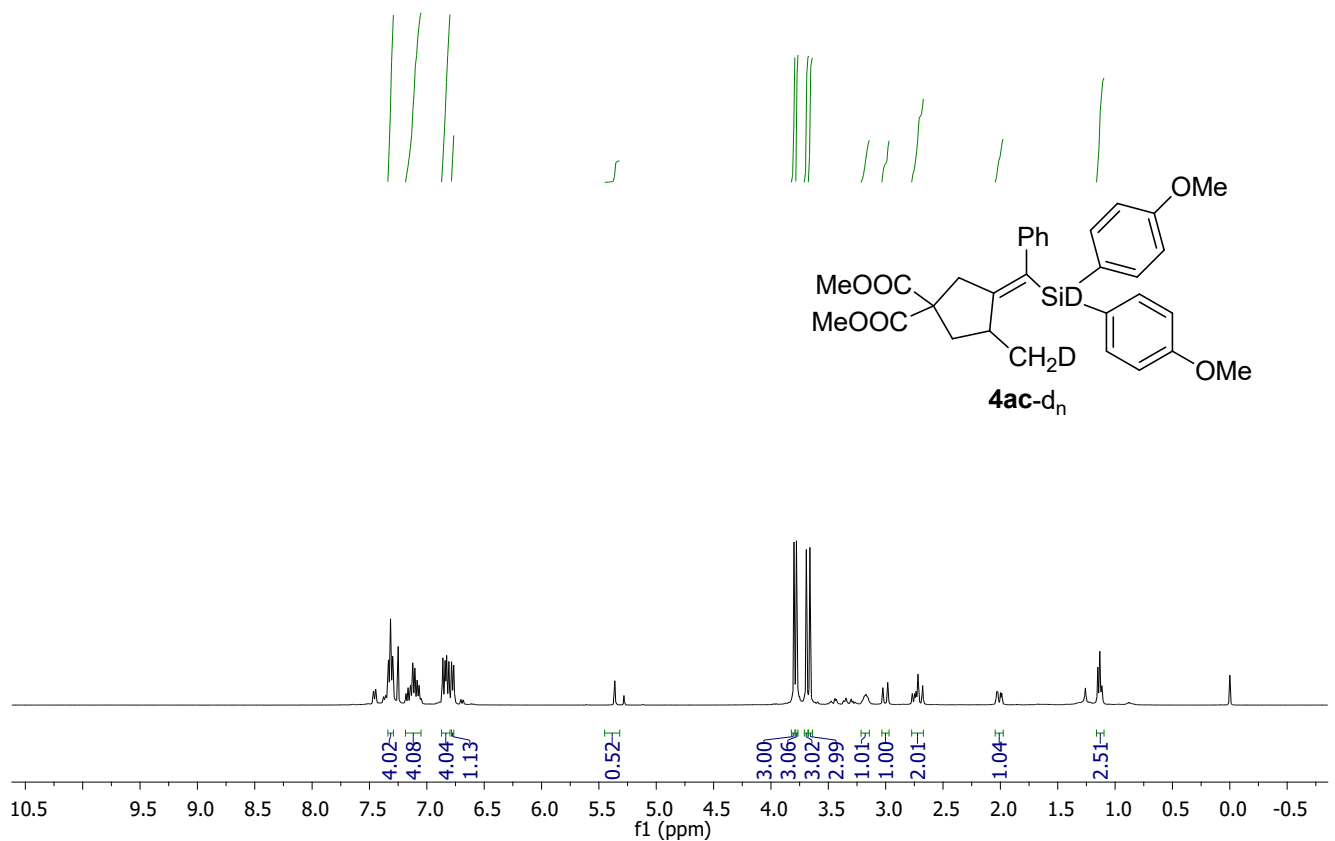

d) Control experiments

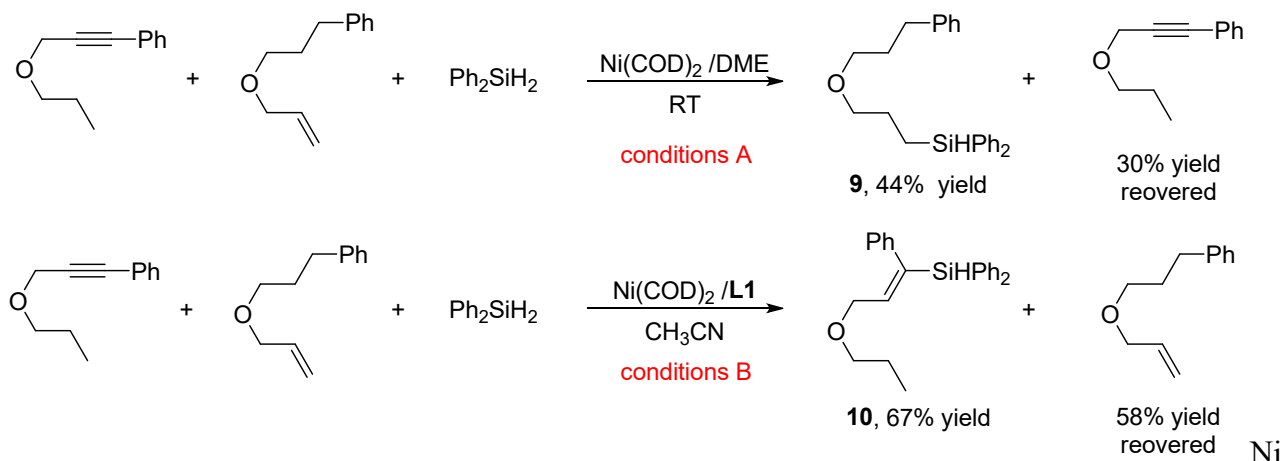

(cod)<sub>2</sub> (5.6 mg, 0.02 mmol) and **2** (36.8mg, 0.2 mmol) in DME (2 mL) were charged into a pressure tube under argon. The mixture was stirred for 30 min at room temperature. Then alkyne (0.2 mmol, 1.0 equiv.) and alkene (0.2 mmol, 1.0 equiv.) were added sequentially to the reaction mixture. The reaction tube was then sealed and placed in an oil bath at room temperature. After the reaction was complete (24 h), the reaction mixture was filtered through a pad of celite, eluted with ethyl acetate, concentrated, and purified by silica gel chromatography (PE : Dioxane = 10:1) to give the indicated product **9**. **9**: <sup>1</sup>H NMR (400 MHz, CDCl<sub>3</sub>) δ 7.49 – 7.47 (m, 4H), 7.29 – 7.24 (m, 6H), 7.19 – 7.16 (m, 2H), 7.10 – 7.06 (m, 3H), 4.80 (t, *J* = 3.7 Hz, 1H), 3.31-3.30 (m, 4H), 2.64 – 2.52 (m, 2H), 1.78 (dq, *J* = 9.0, 6.4 Hz, 2H), 1.66-1.65 (m, 2H), 1.13 – 1.08 (m, 2H). <sup>13</sup>C NMR (101 MHz, CDCl<sub>3</sub>) δ 142.2, 135.3, 134.5, 129.7, 128.6, 128.4, 128.1, 125.9, 73.2, 70.0, 32.5, 31.5, 24.8, 8.6. HRMS (ESI, *m/z*): calcd for C<sub>24</sub>H<sub>28</sub>NaOSi<sup>+</sup> [M + Na]<sup>+</sup>: 383.1802, found 383.1777.

Ni(cod)<sub>2</sub> (5.6 mg, 0.02 mmol) and L1 (8.5 mg, 0.02 mmol) in CH<sub>3</sub>CN (2 mL) were charged into a pressure tube under argon. The mixture was stirred for 30 min at room temperature, followed by addition of **2** was added and stirred for 30 min. Then alkyne (0.2 mmol, 1.0 equiv.) and alkene (0.2 mmol, 1.0 equiv.) were added sequentially to the reaction mixture. The reaction tube was then sealed and placed in an oil bath at room temperature. After the reaction was complete (24 h), the reaction mixture was filtered through a pad of celite, eluted with ethyl acetate, concentrated, and purified by silica gel chromatography (PE : Dioxane = 10:1) to give the indicated product **10**<sup>[2]</sup>. **10**: <sup>1</sup>H NMR (400 MHz, CDCl<sub>3</sub>) δ 7.54-7.52 (m, 4H), 7.43 – 7.30 (m, 6H), 7.25 – 7.12 (m, 3H), 7.06 – 6.93 (m, 2H), 6.34 (t, *J* = 5.8 Hz, 1H), 5.23 (s, 1H), 4.02 (d, *J* = 5.9 Hz, 2H), 3.30 (t, *J* = 6.6 Hz, 2H), 1.54 (dd, *J* = 14.2, 7.2

Hz, 2H), 0.88 (t,  $J = 7.4$  Hz, 3H).  $^{13}\text{C}$  NMR (101 MHz,  $\text{CDCl}_3$ )  $\delta$  143.9, 140.9, 140.7, 135.9, 133.1, 129.9, 128.3, 128.1, 126.5, 72.46, 68.7, 23.0, 10.7.  $\text{C}_{24}\text{H}_{28}\text{NaOSi}^+ [\text{M} + \text{Na}]^+$ : 381.1645, found 381.1657.



## 7. Crystal structure details

Crystal structure details for **4j** (CDCC 2177517), Thermal ellipsoids are shown at 50 % probability level (hydrogen atoms were omitted).

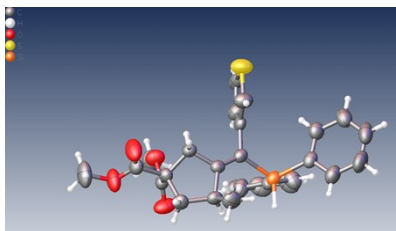

Table 1 Crystal data and structure refinement for **4j**.

|                                    |                                                    |
|------------------------------------|----------------------------------------------------|
| Identification code                | <b>4j</b>                                          |
| Empirical formula                  | C <sub>27</sub> H <sub>28</sub> O <sub>4</sub> SSi |
| Formula weight                     | 476.64                                             |
| Temperature/K                      | 293(2)                                             |
| Crystal system                     | monoclinic                                         |
| Space group                        | P2 <sub>1</sub> /n                                 |
| a/Å                                | 11.1642(5)                                         |
| b/Å                                | 19.7847(10)                                        |
| c/Å                                | 11.8671(5)                                         |
| α /°                               | 90                                                 |
| β /°                               | 101.346(4)                                         |
| γ /°                               | 90                                                 |
| Volume/Å <sup>3</sup>              | 2570.0(2)                                          |
| Z                                  | 4                                                  |
| ρ <sub>calc</sub> /cm <sup>3</sup> | 1.232                                              |
| μ /mm <sup>-1</sup>                | 1.806                                              |
| F(000)                             | 1008.0                                             |
| Crystal size/mm <sup>3</sup>       | 0.02 × 0.01 × 0.01                                 |
| Radiation                          | Cu K α (λ = 1.54184)                               |
| 2θ range for data collection/°     | 8.816 to 142.778                                   |
| Index ranges                       | -13 ≤ h ≤ 13, -19 ≤ k ≤ 23, -11 ≤ l ≤ 14           |

|                                                |                                                                  |
|------------------------------------------------|------------------------------------------------------------------|
| Reflections collected                          | 11571                                                            |
| Independent reflections                        | 4844 [ $R_{\text{int}} = 0.0326$ , $R_{\text{sigma}} = 0.0358$ ] |
| Data/restraints/parameters                     | 4844/3/309                                                       |
| Goodness-of-fit on $F^2$                       | 1.081                                                            |
| Final R indexes [ $I \geq 2 \sigma(I)$ ]       | $R_1 = 0.0725$ , $wR_2 = 0.2006$                                 |
| Final R indexes [all data]                     | $R_1 = 0.0886$ , $wR_2 = 0.2160$                                 |
| Largest diff. peak/hole / $e \text{ \AA}^{-3}$ | 0.72/-0.49                                                       |

## 8. References

- [1] N. C. Lobera, M. T. Quiros, W. W. Brennessel, M. L. Neidig, E. Buñuel and D. J. Cardenas. *Org. Letters*. **2019**, *21*, 6552-6556.
- [2] Y. Q. You and S. Z. Ge. *Angew. Chem. Int. Ed*, **2021**, *60*, 12046-12052.

## 9. NMR Spectra

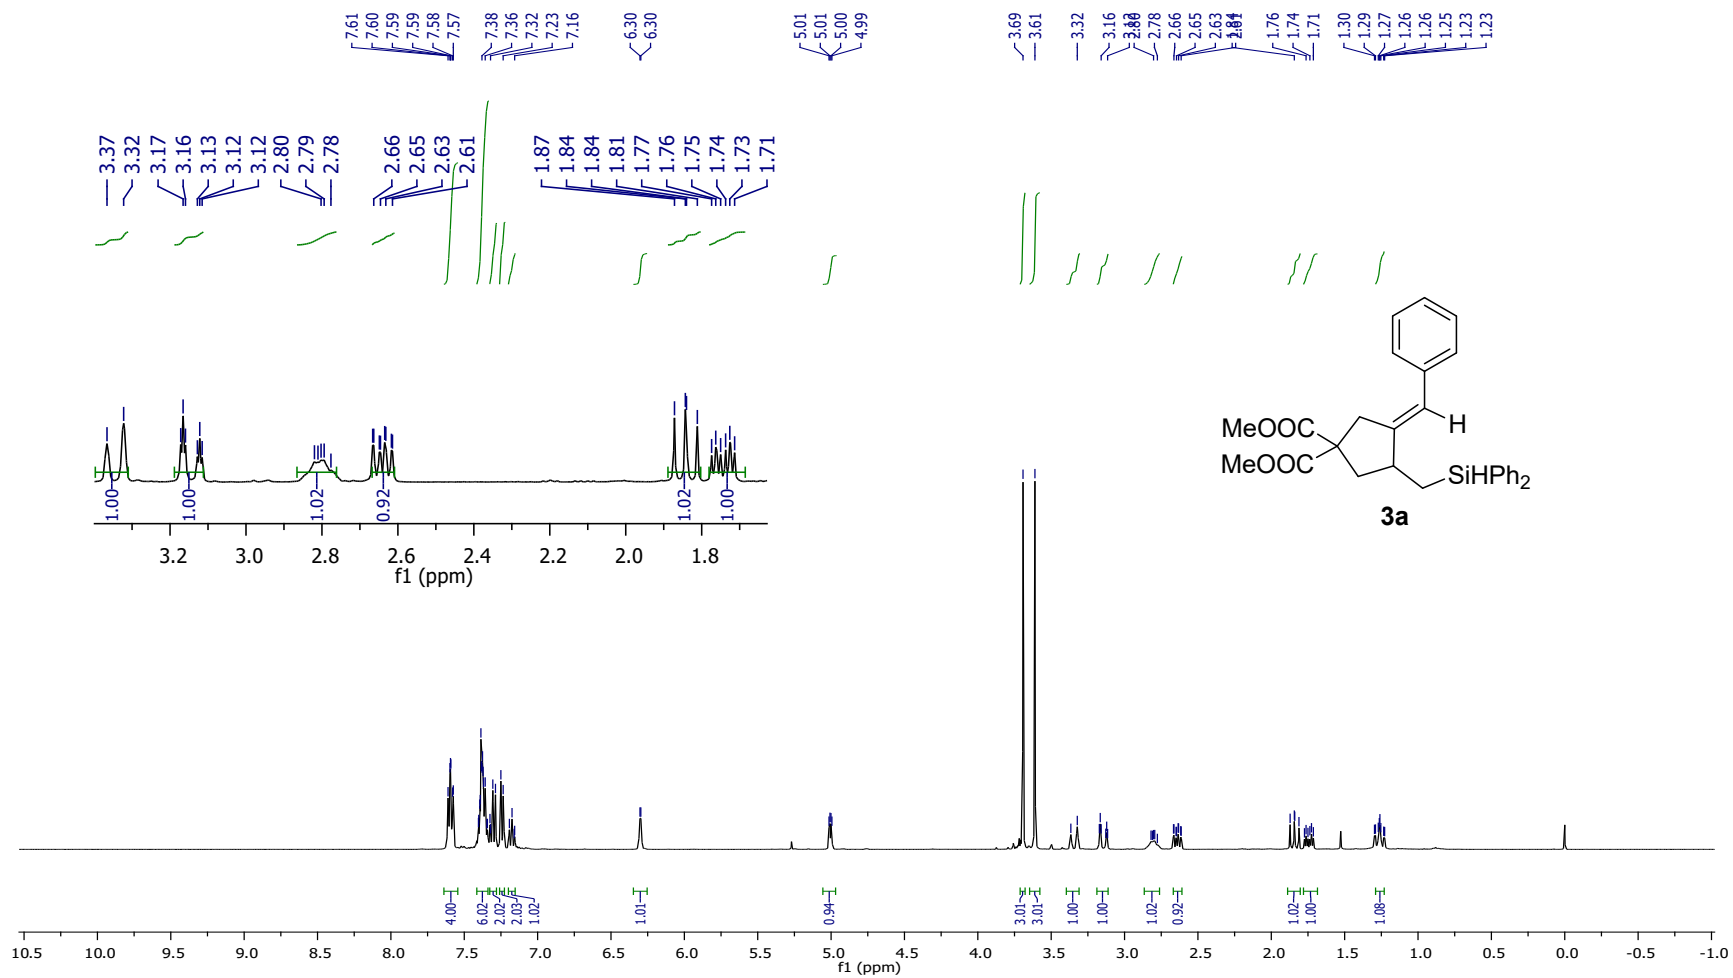

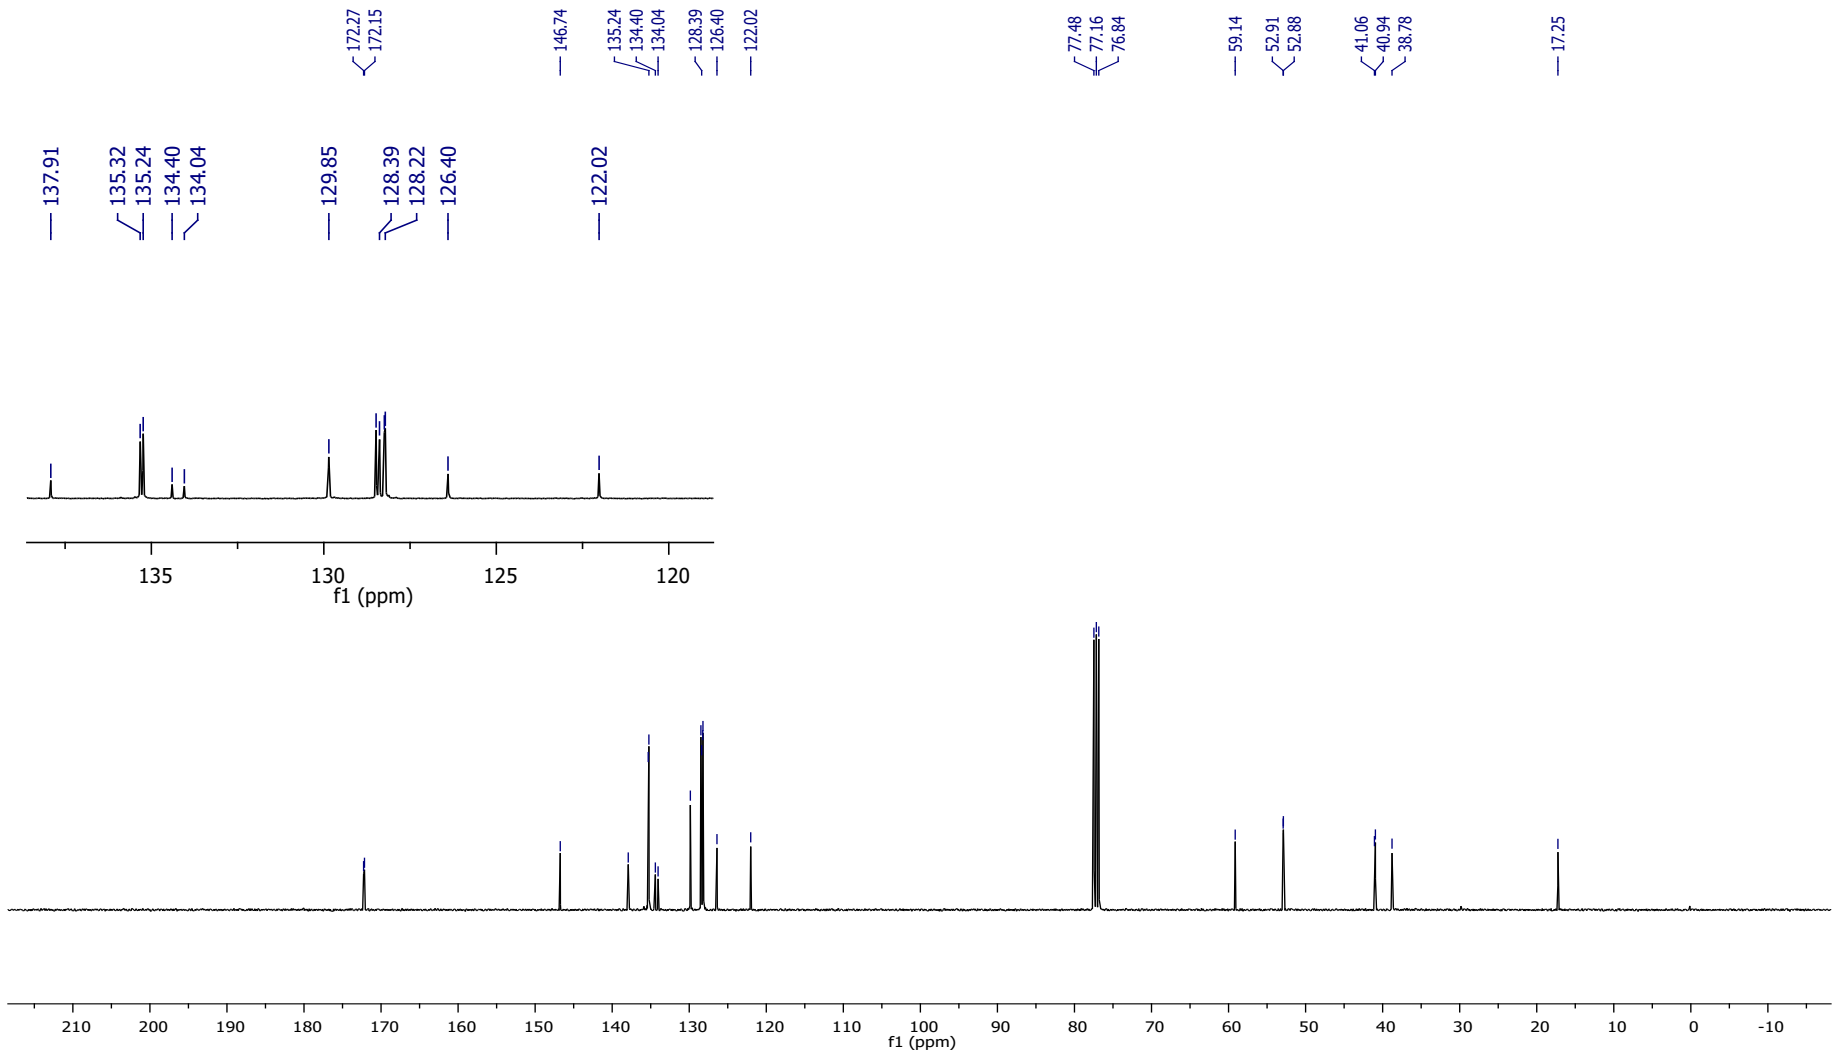

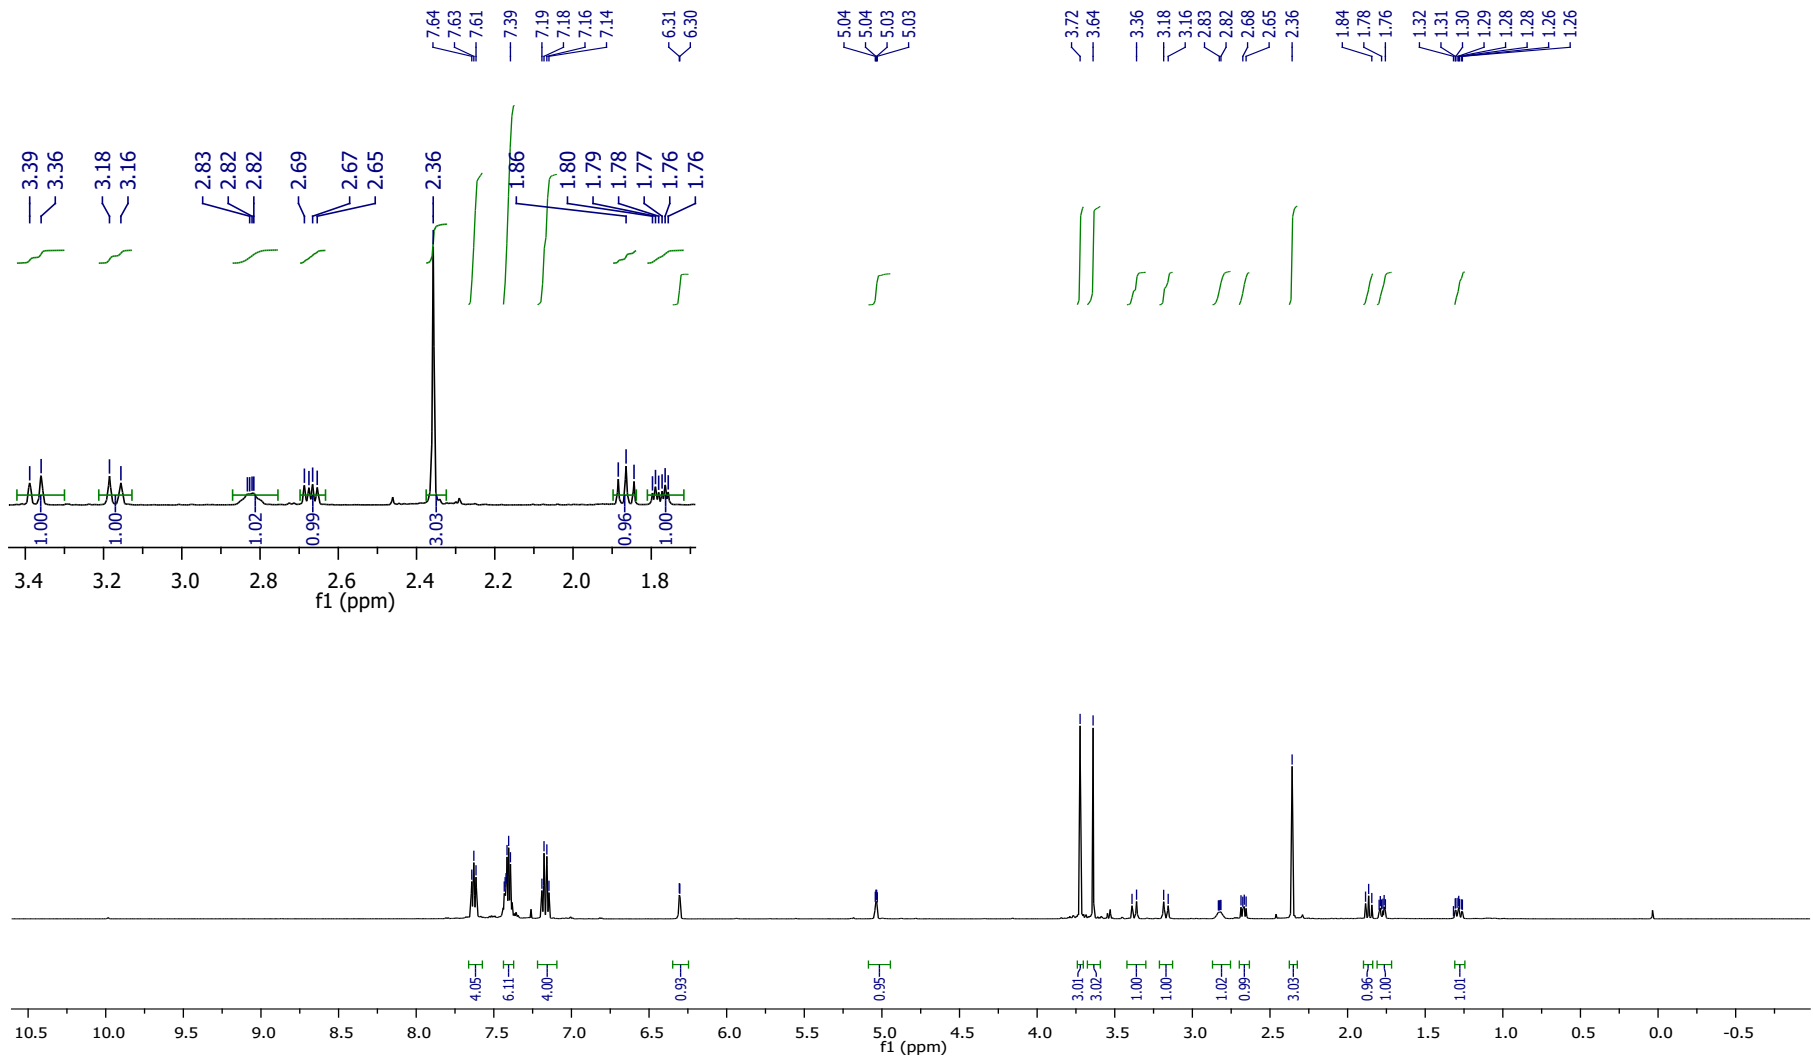

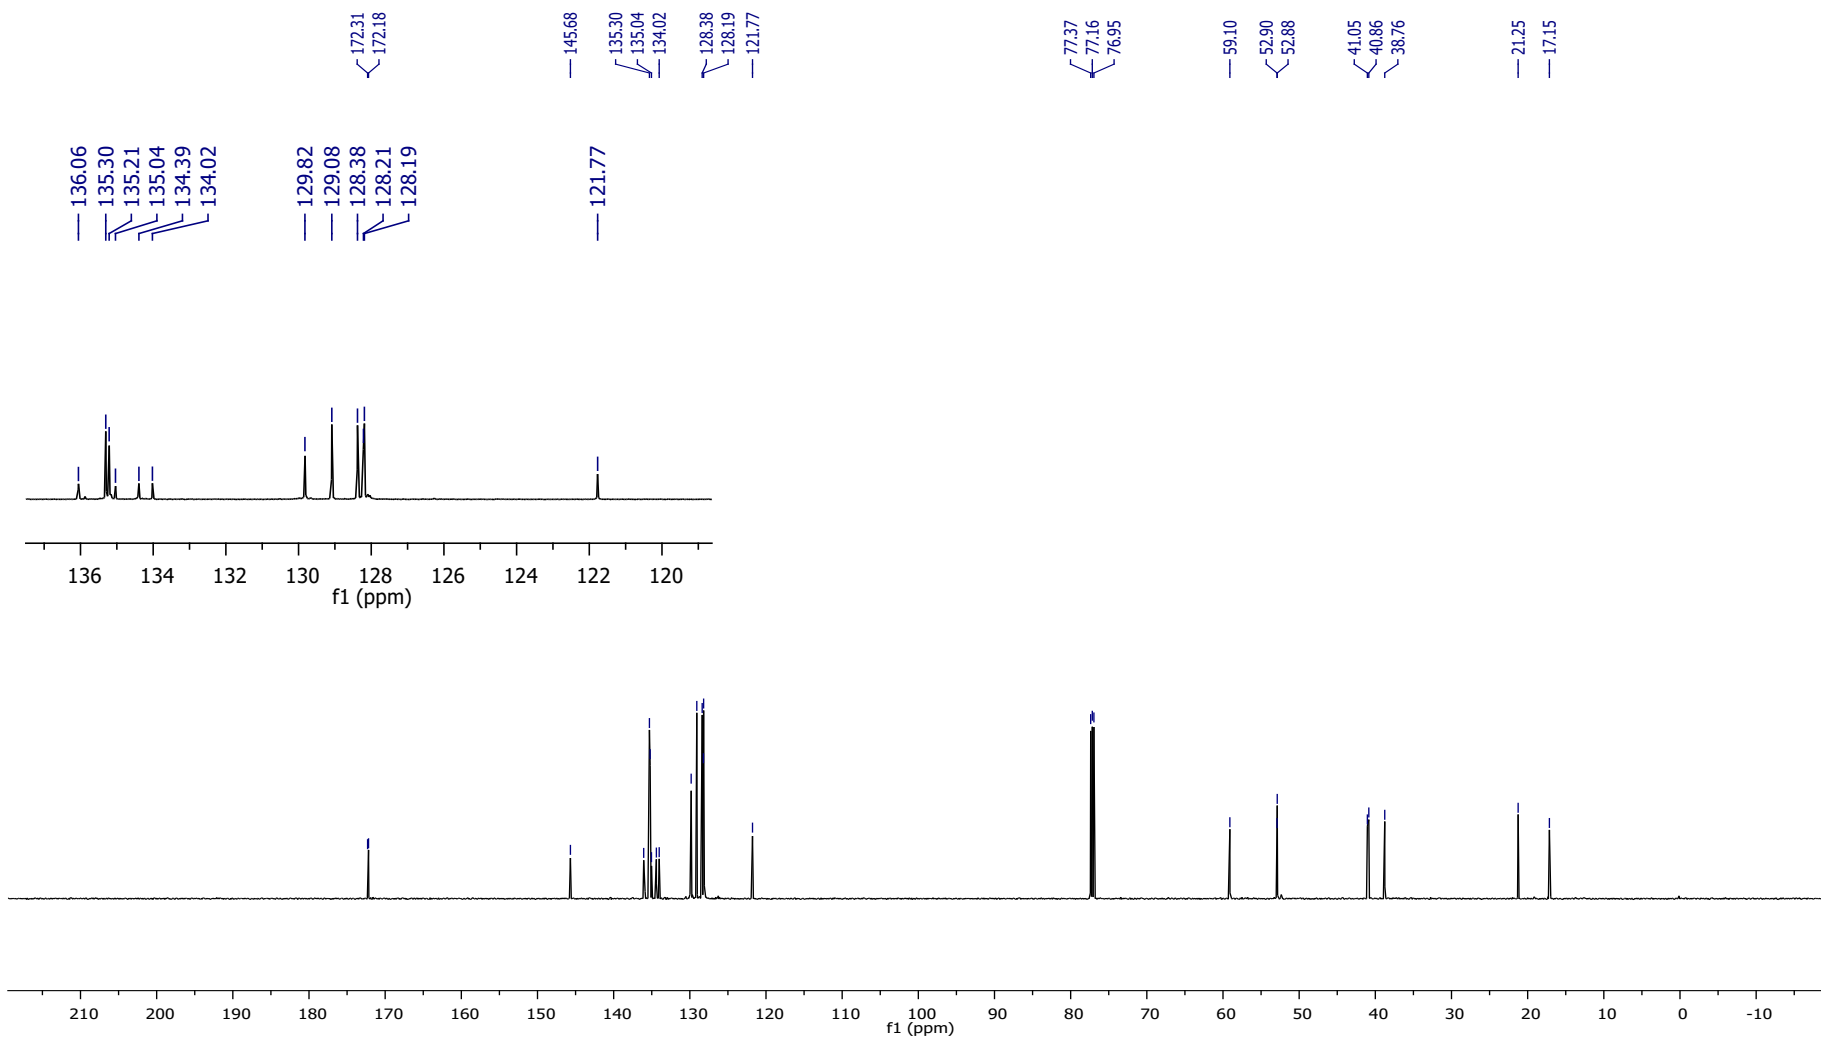

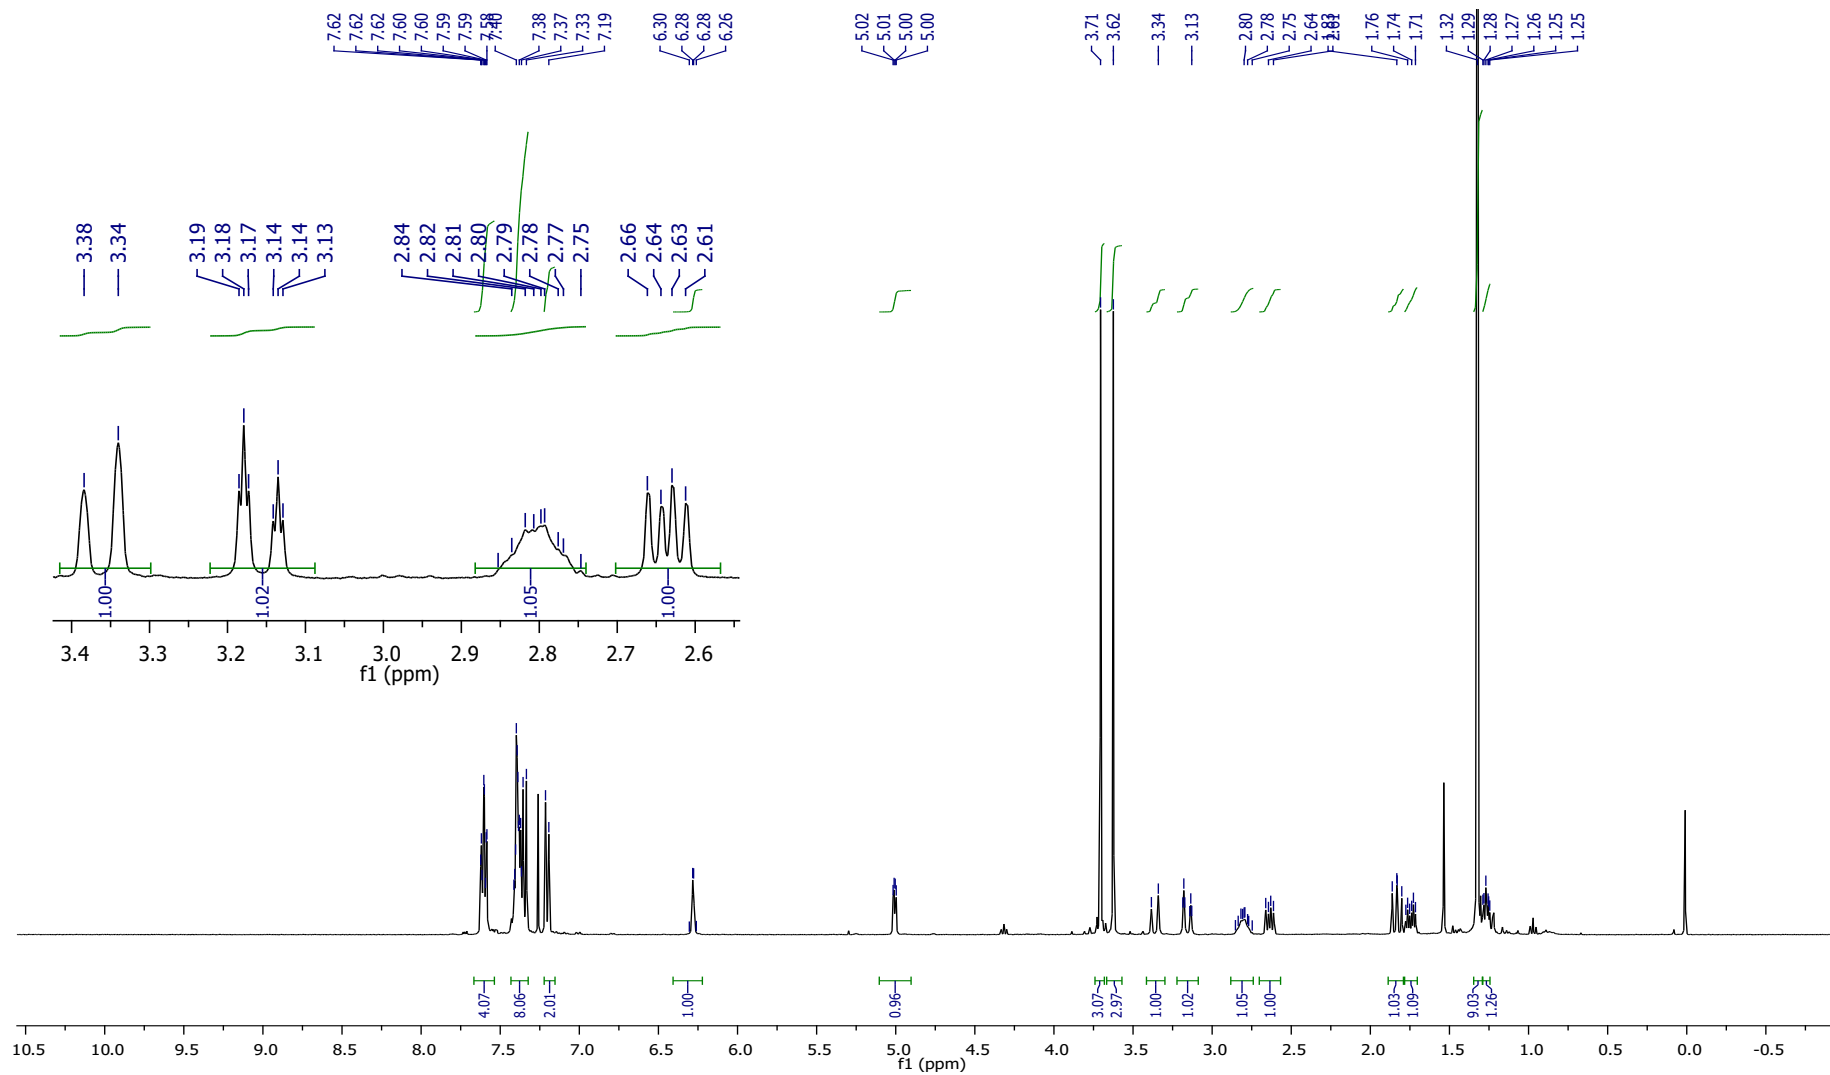



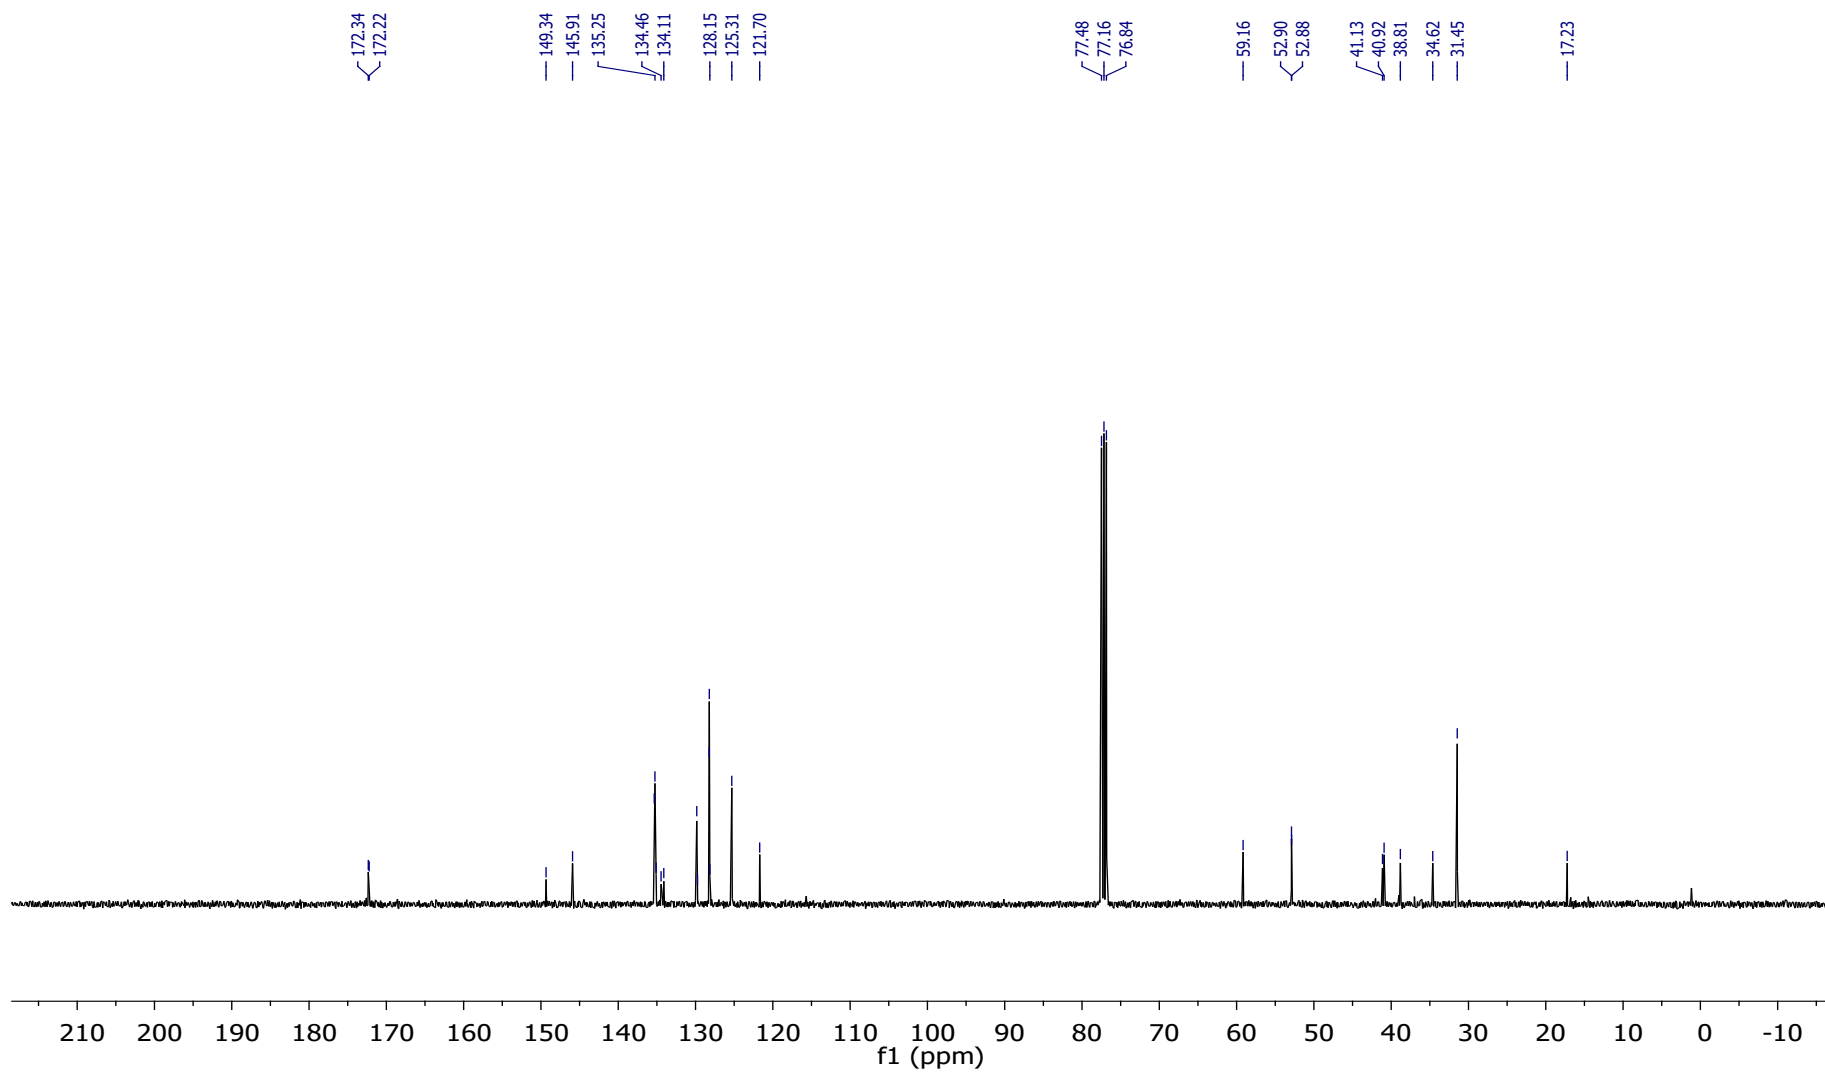

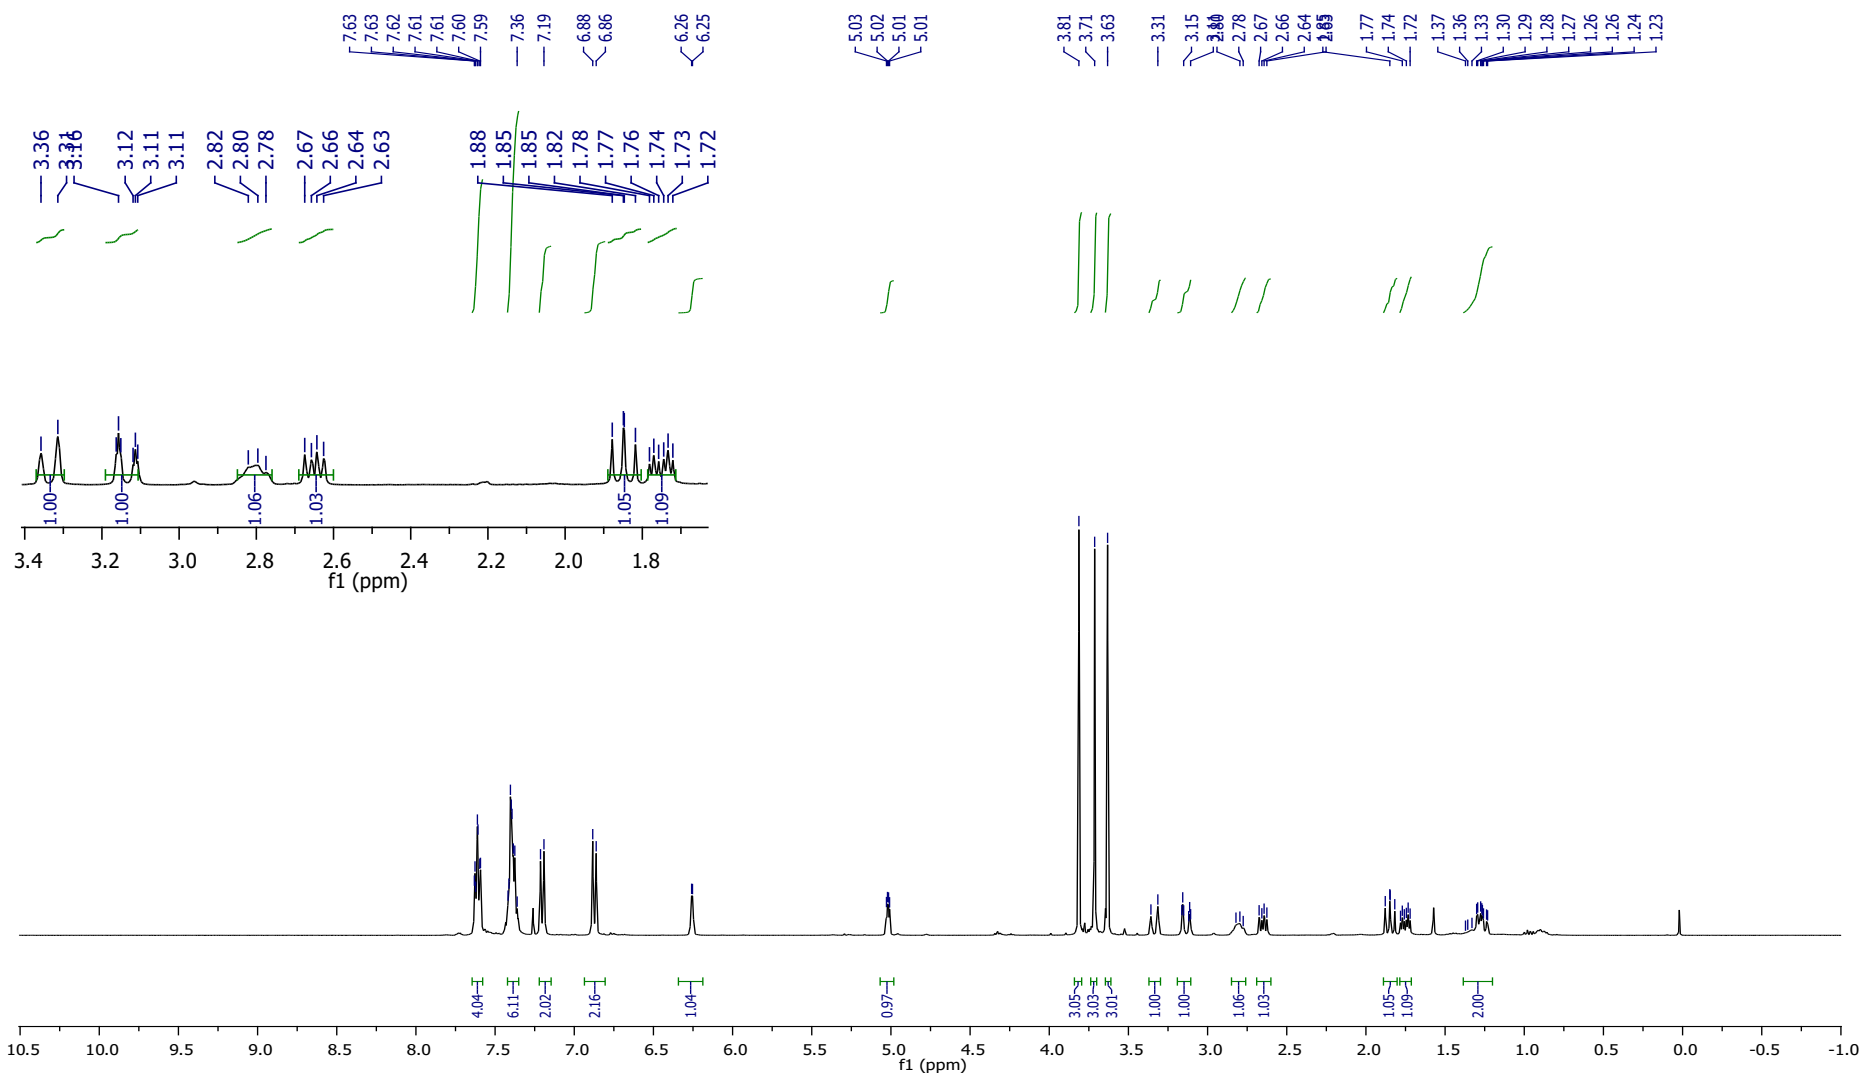

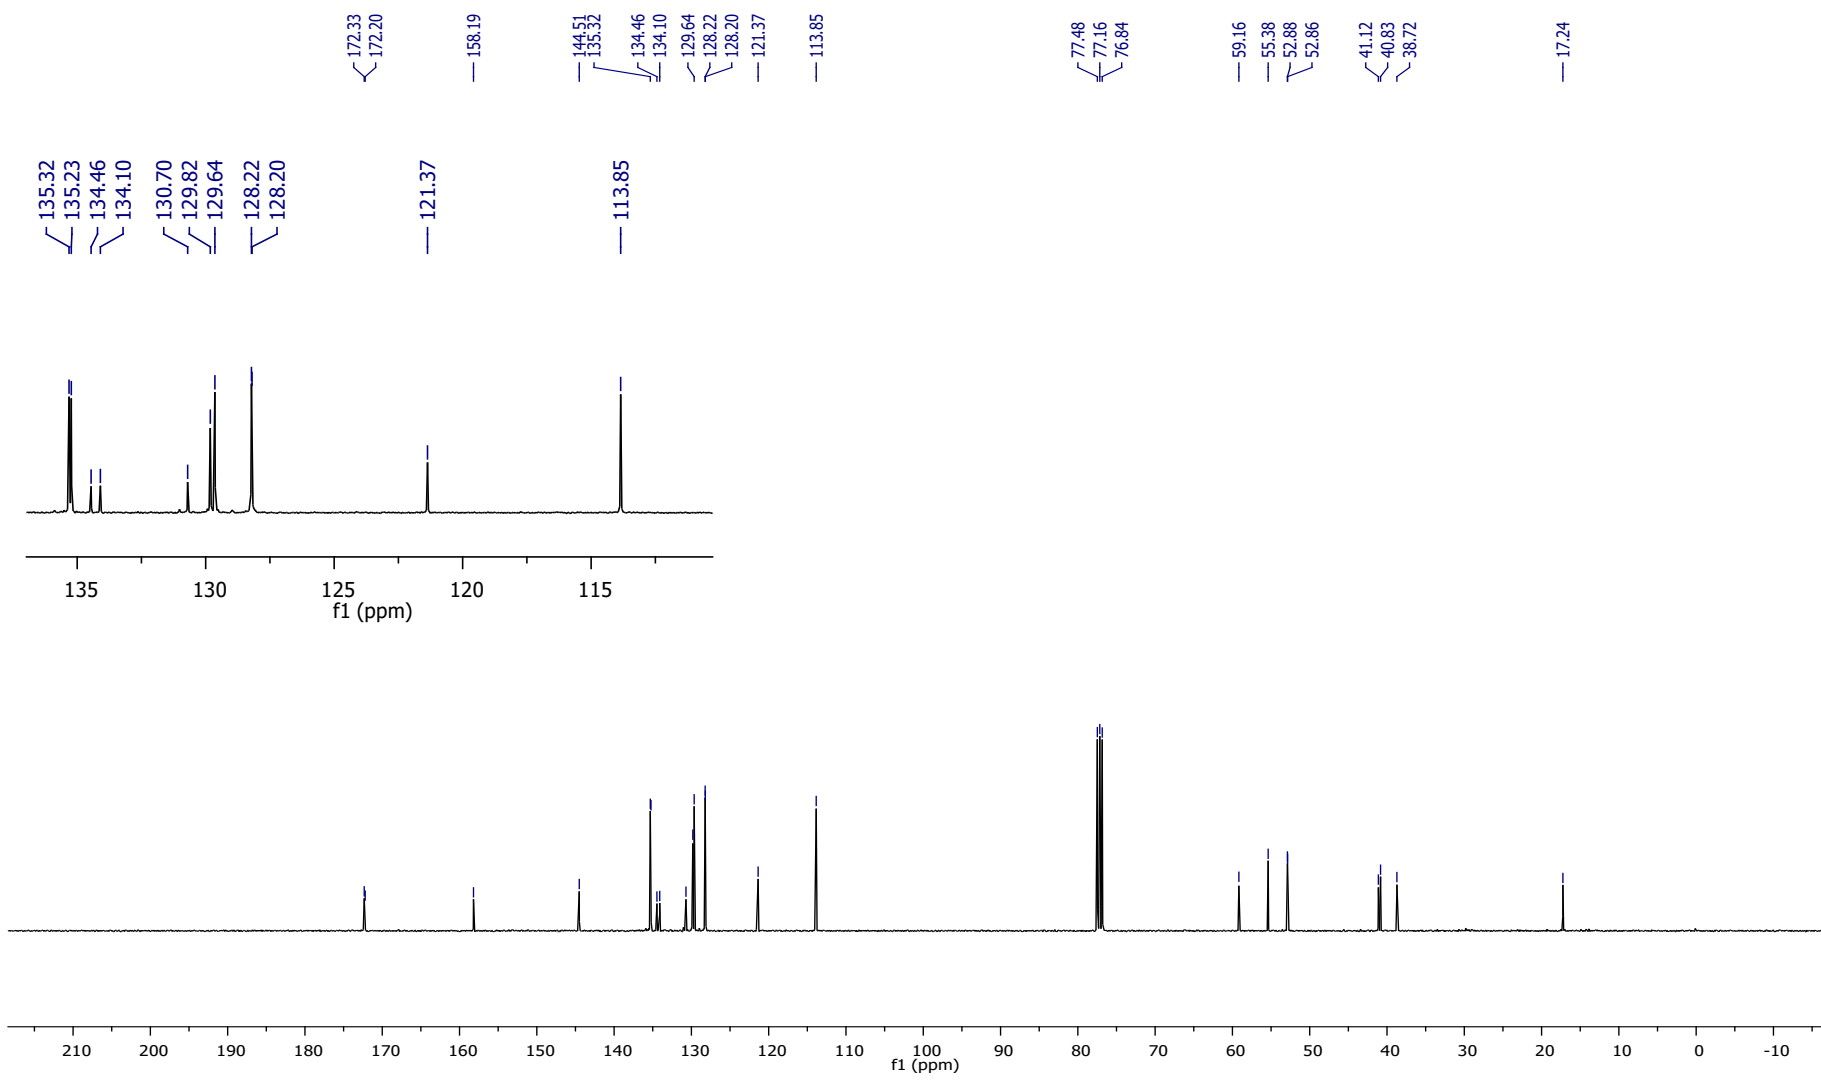

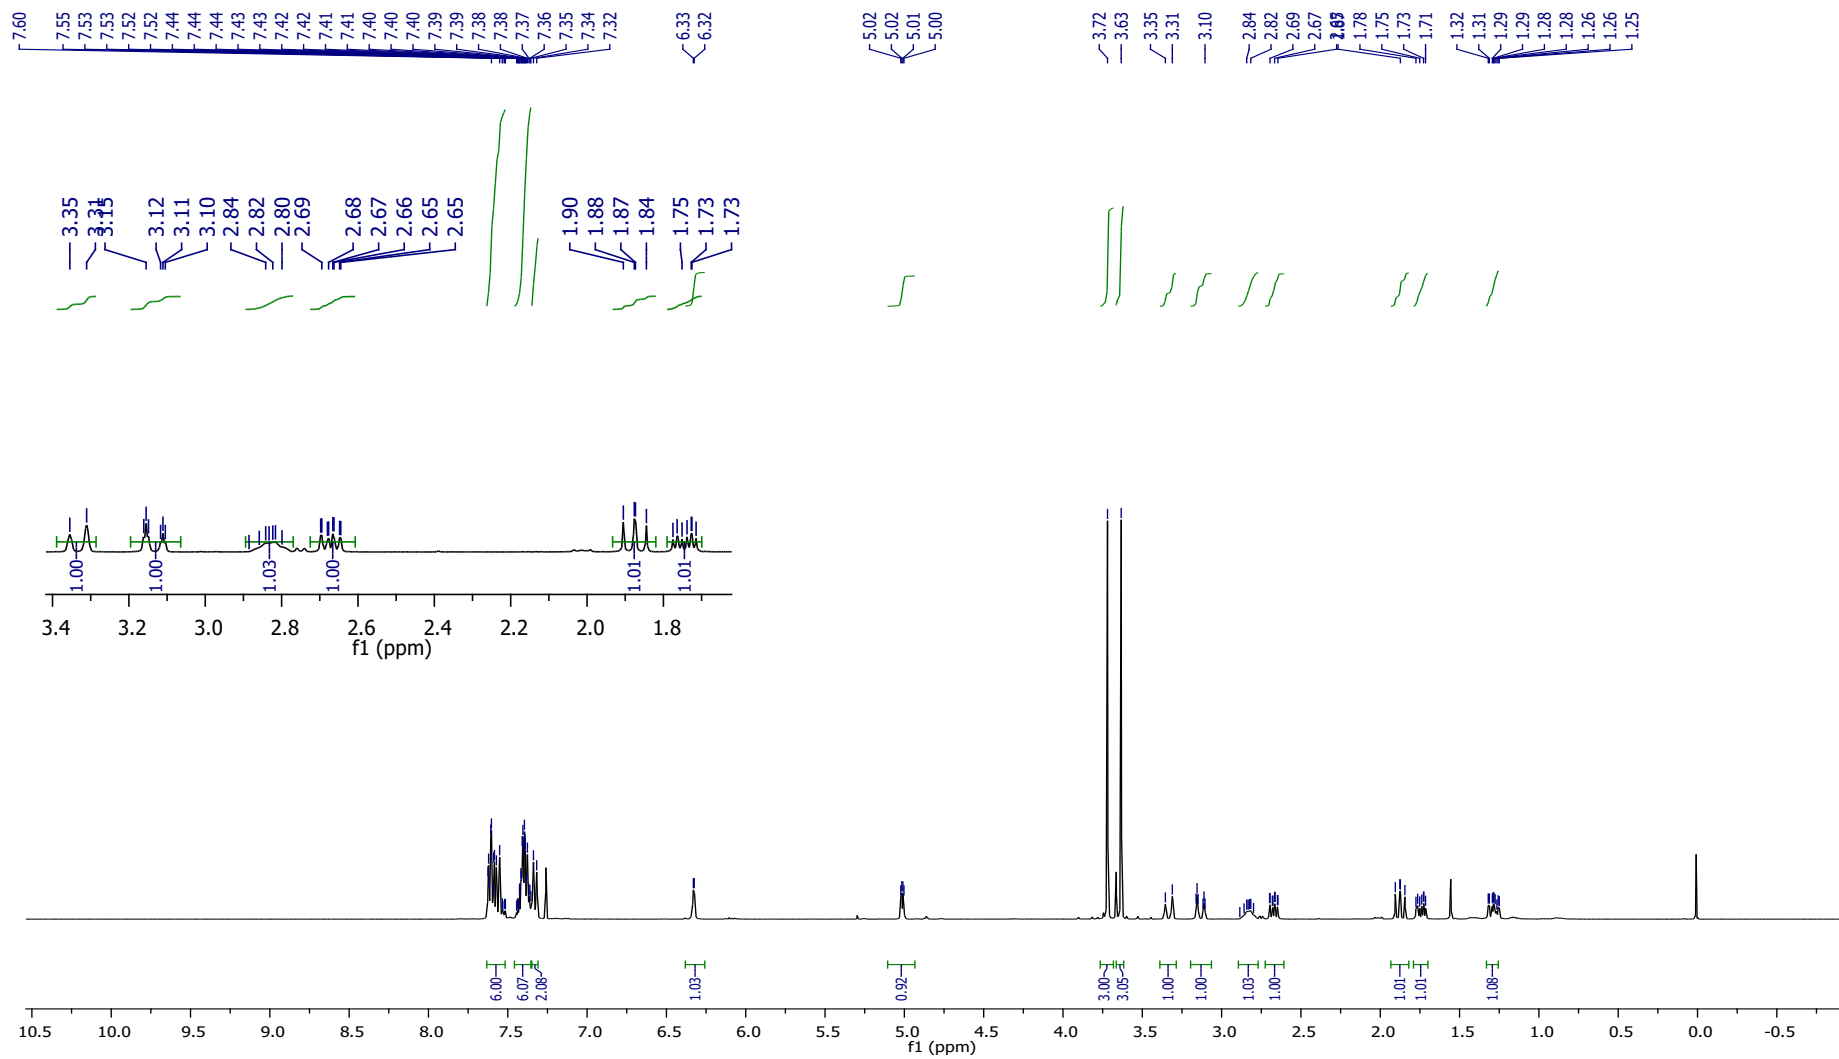

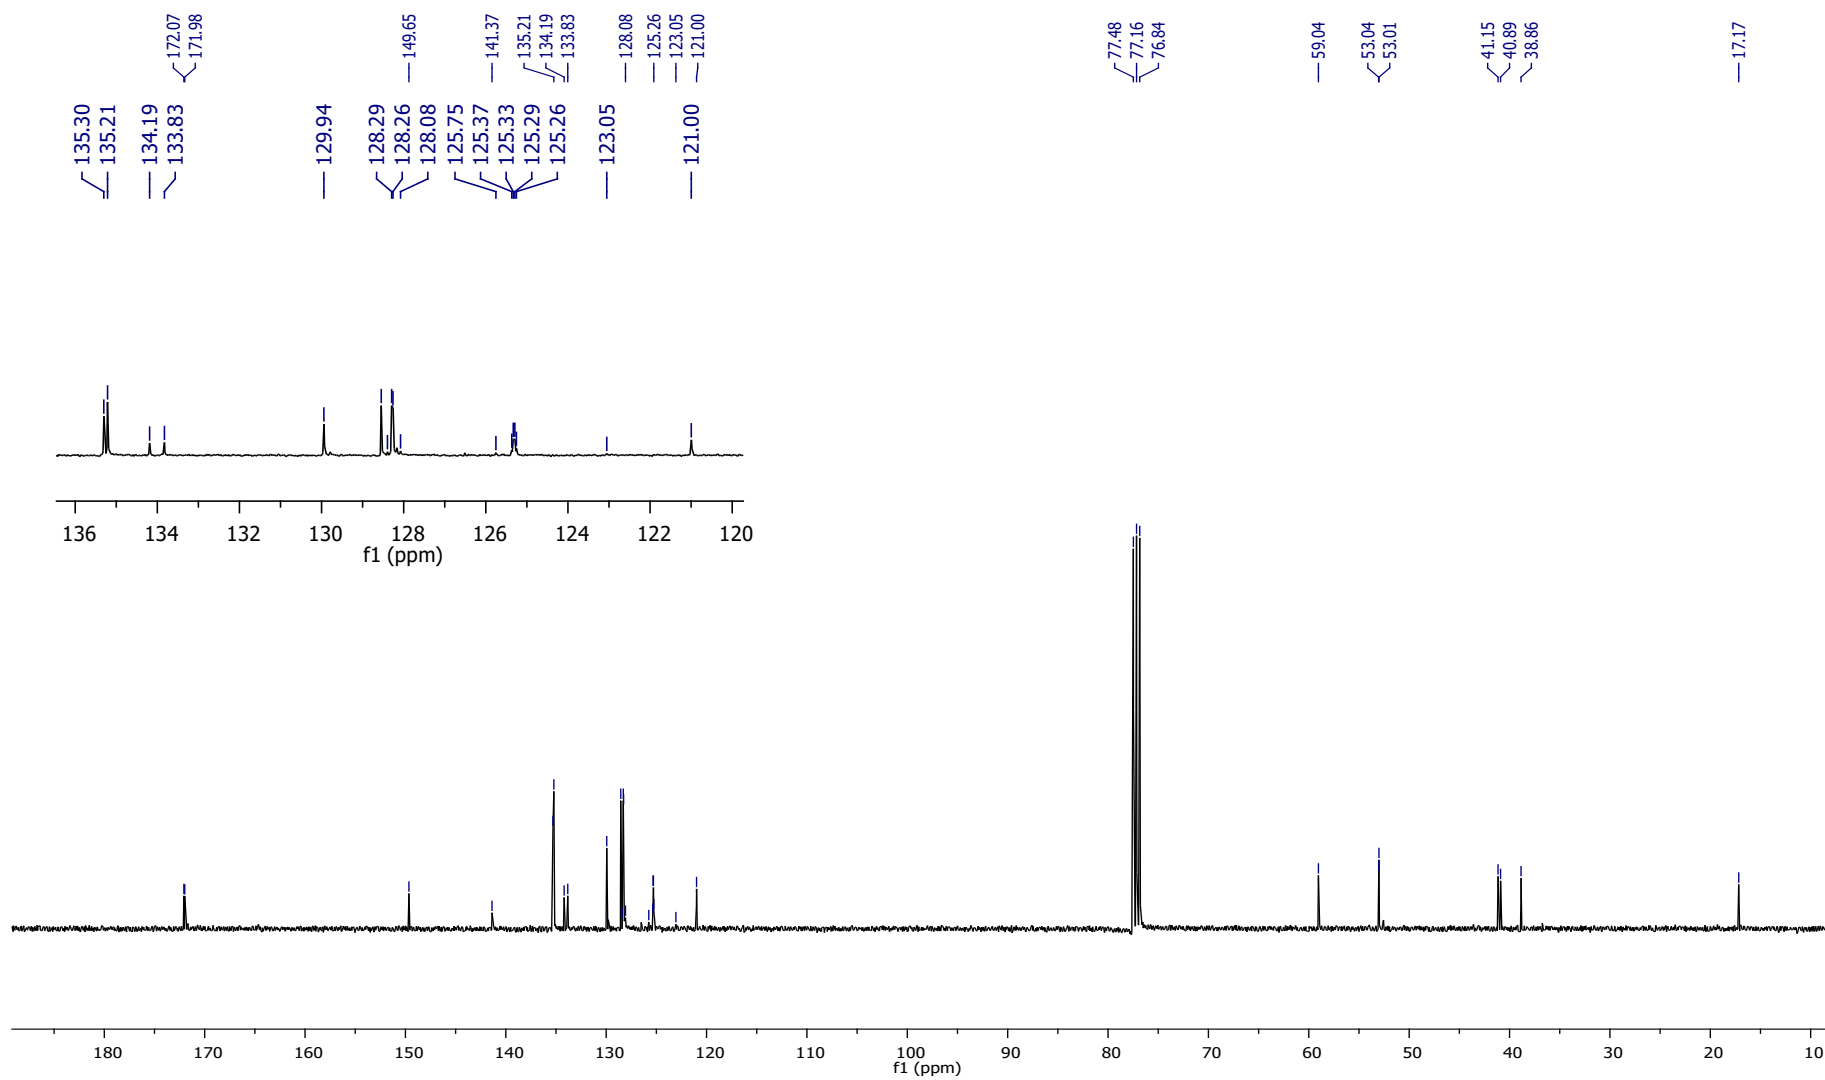

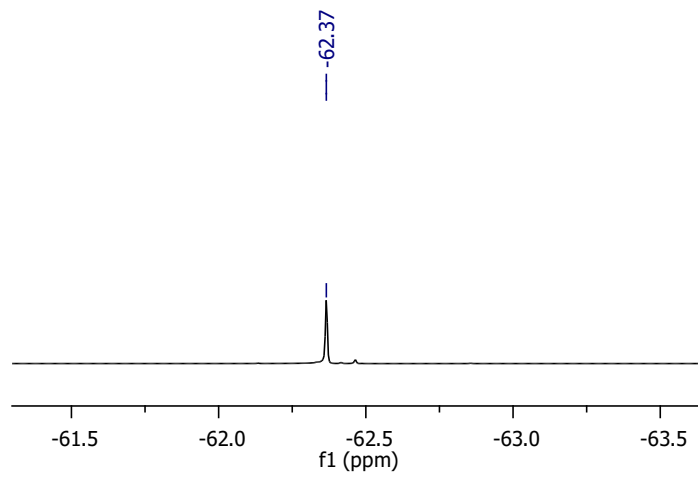

-62.37

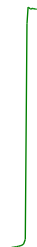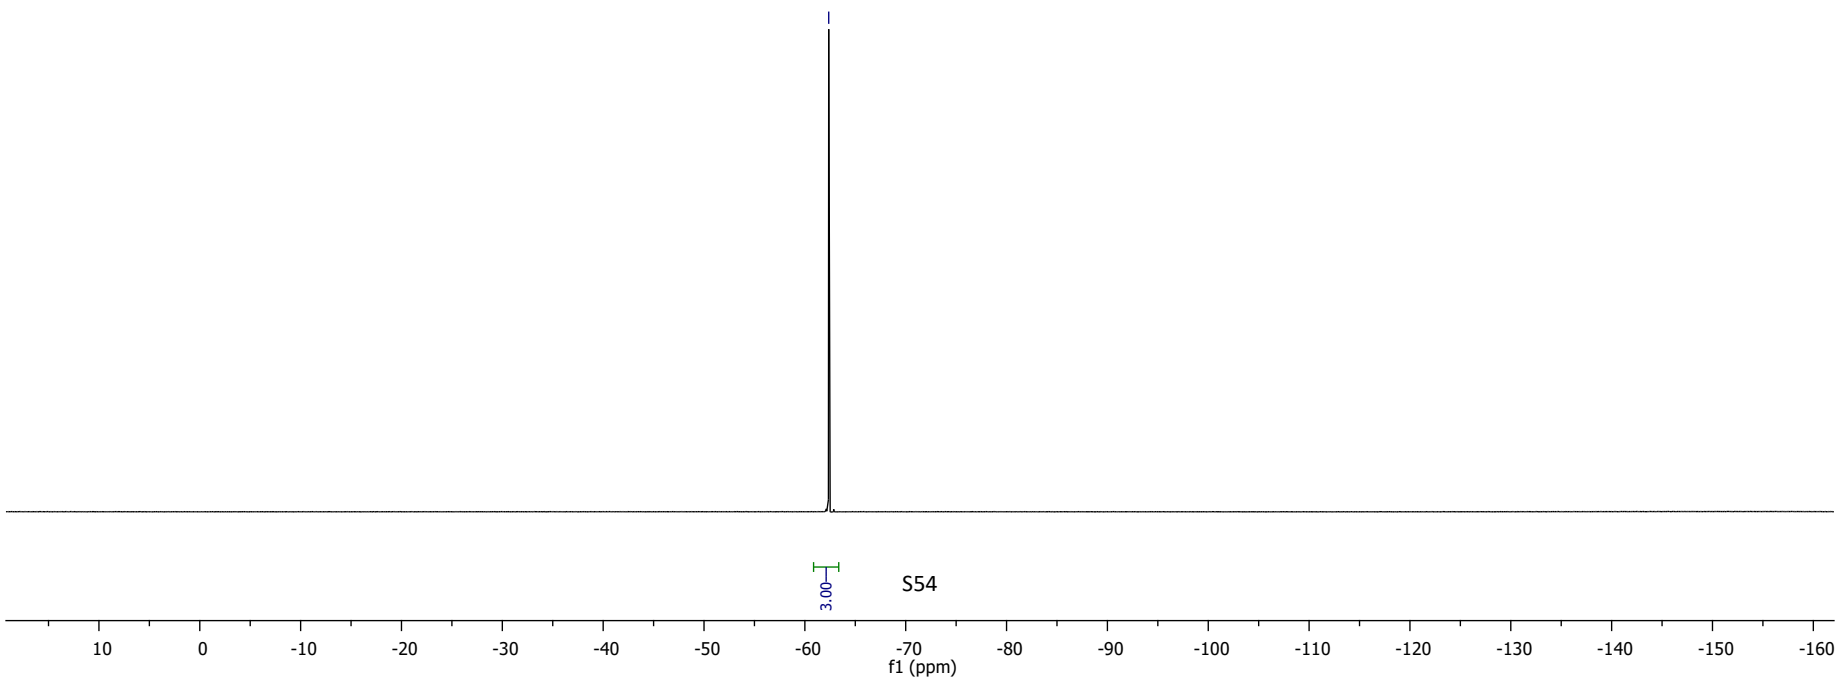

3.00

S54

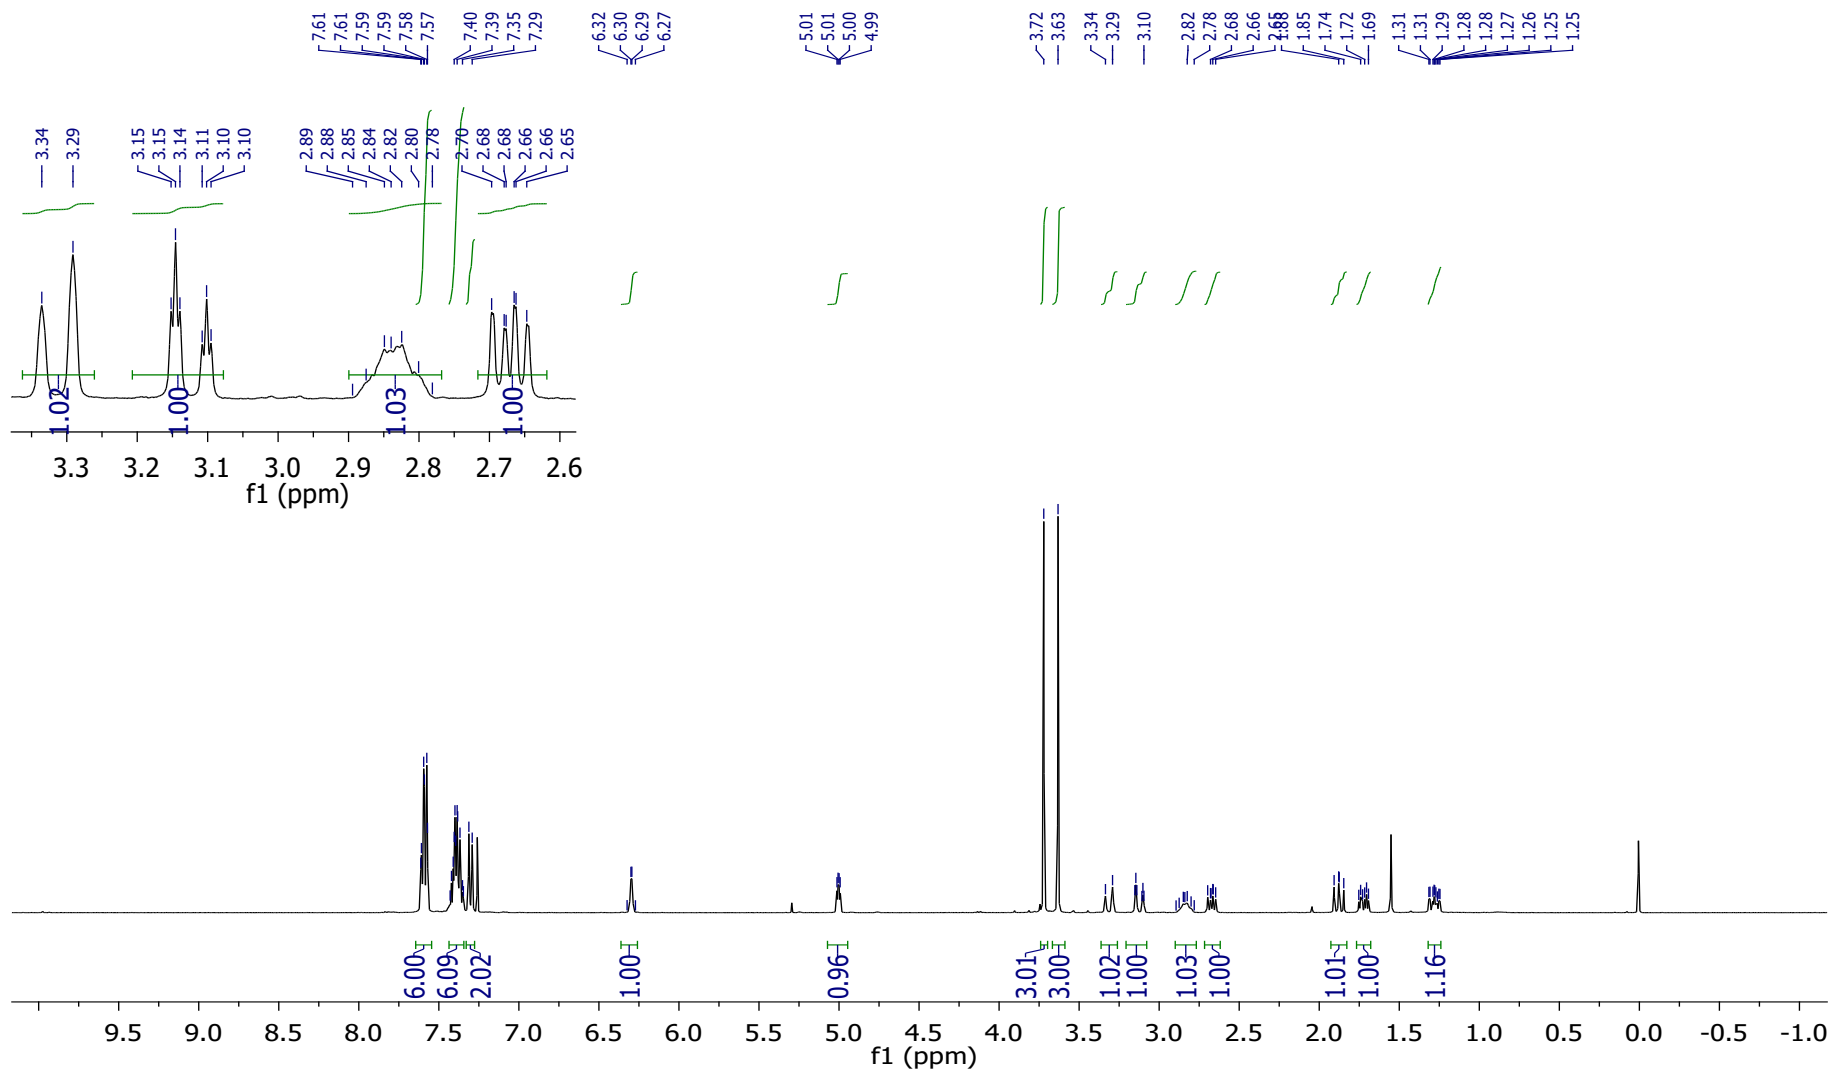

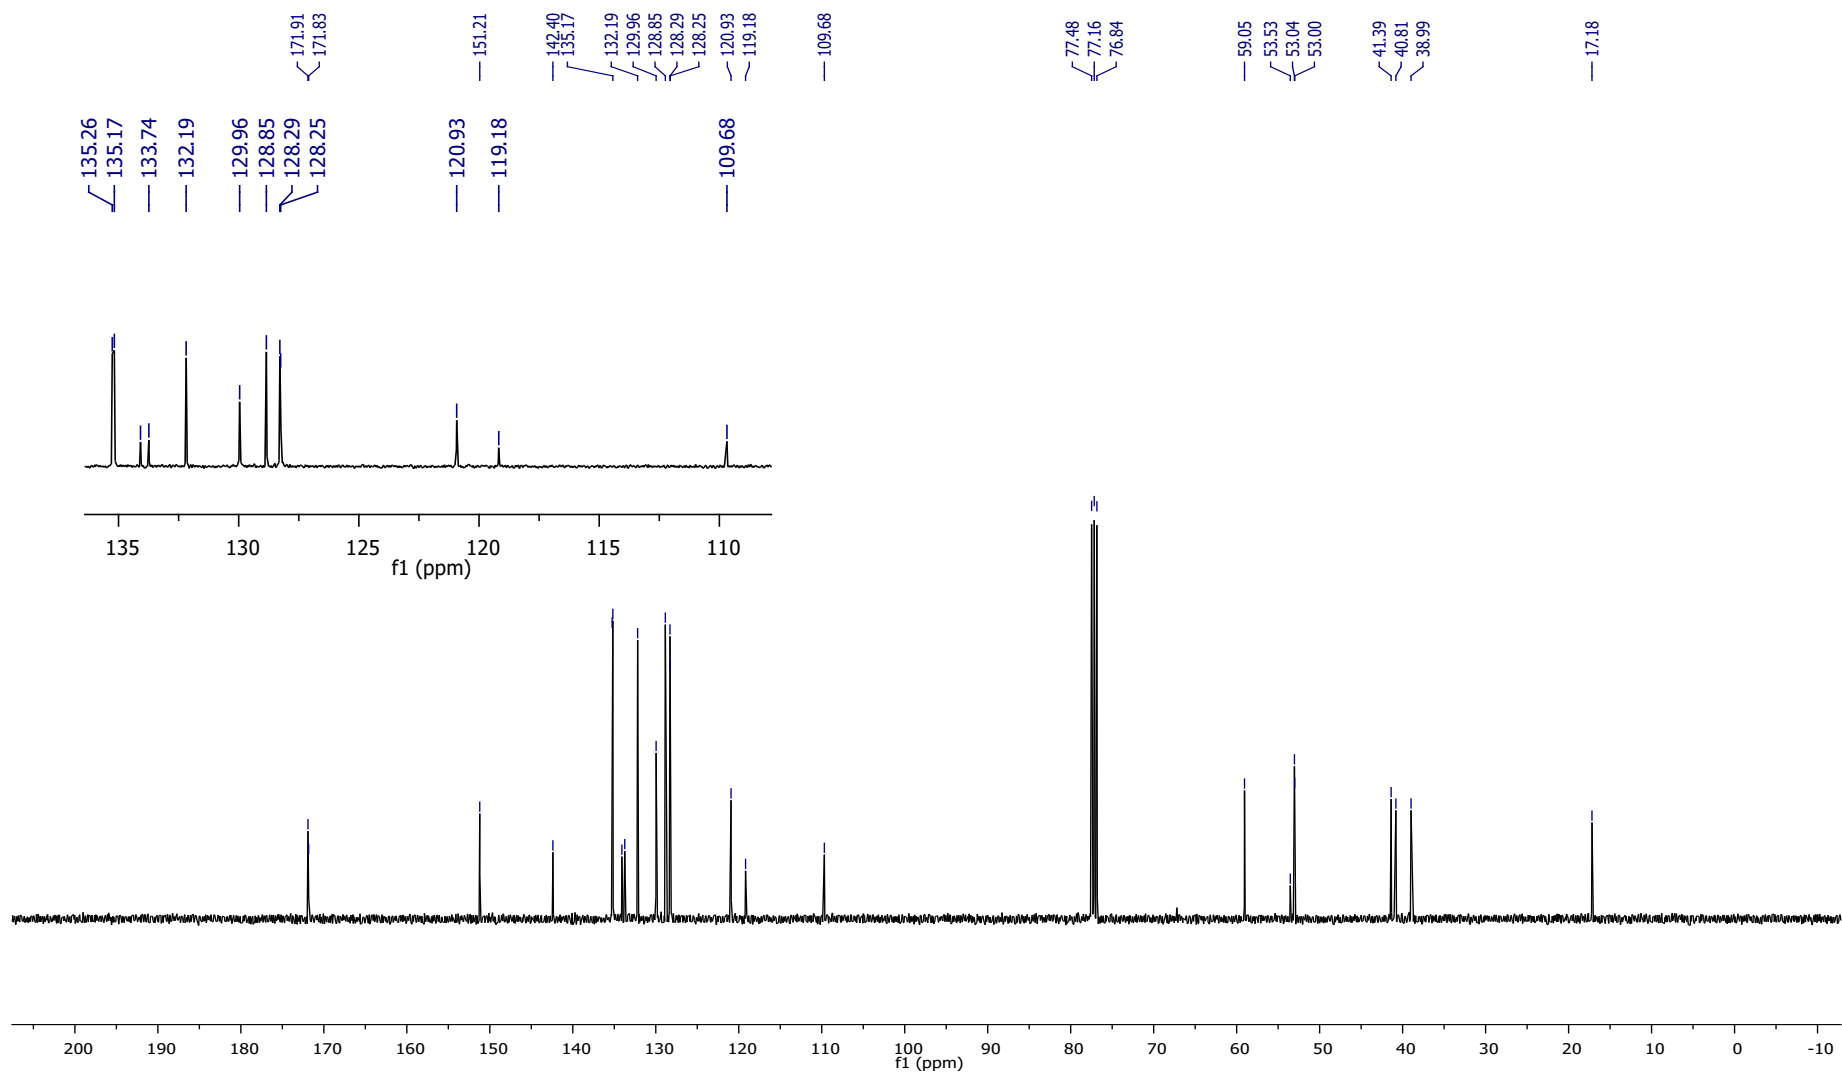



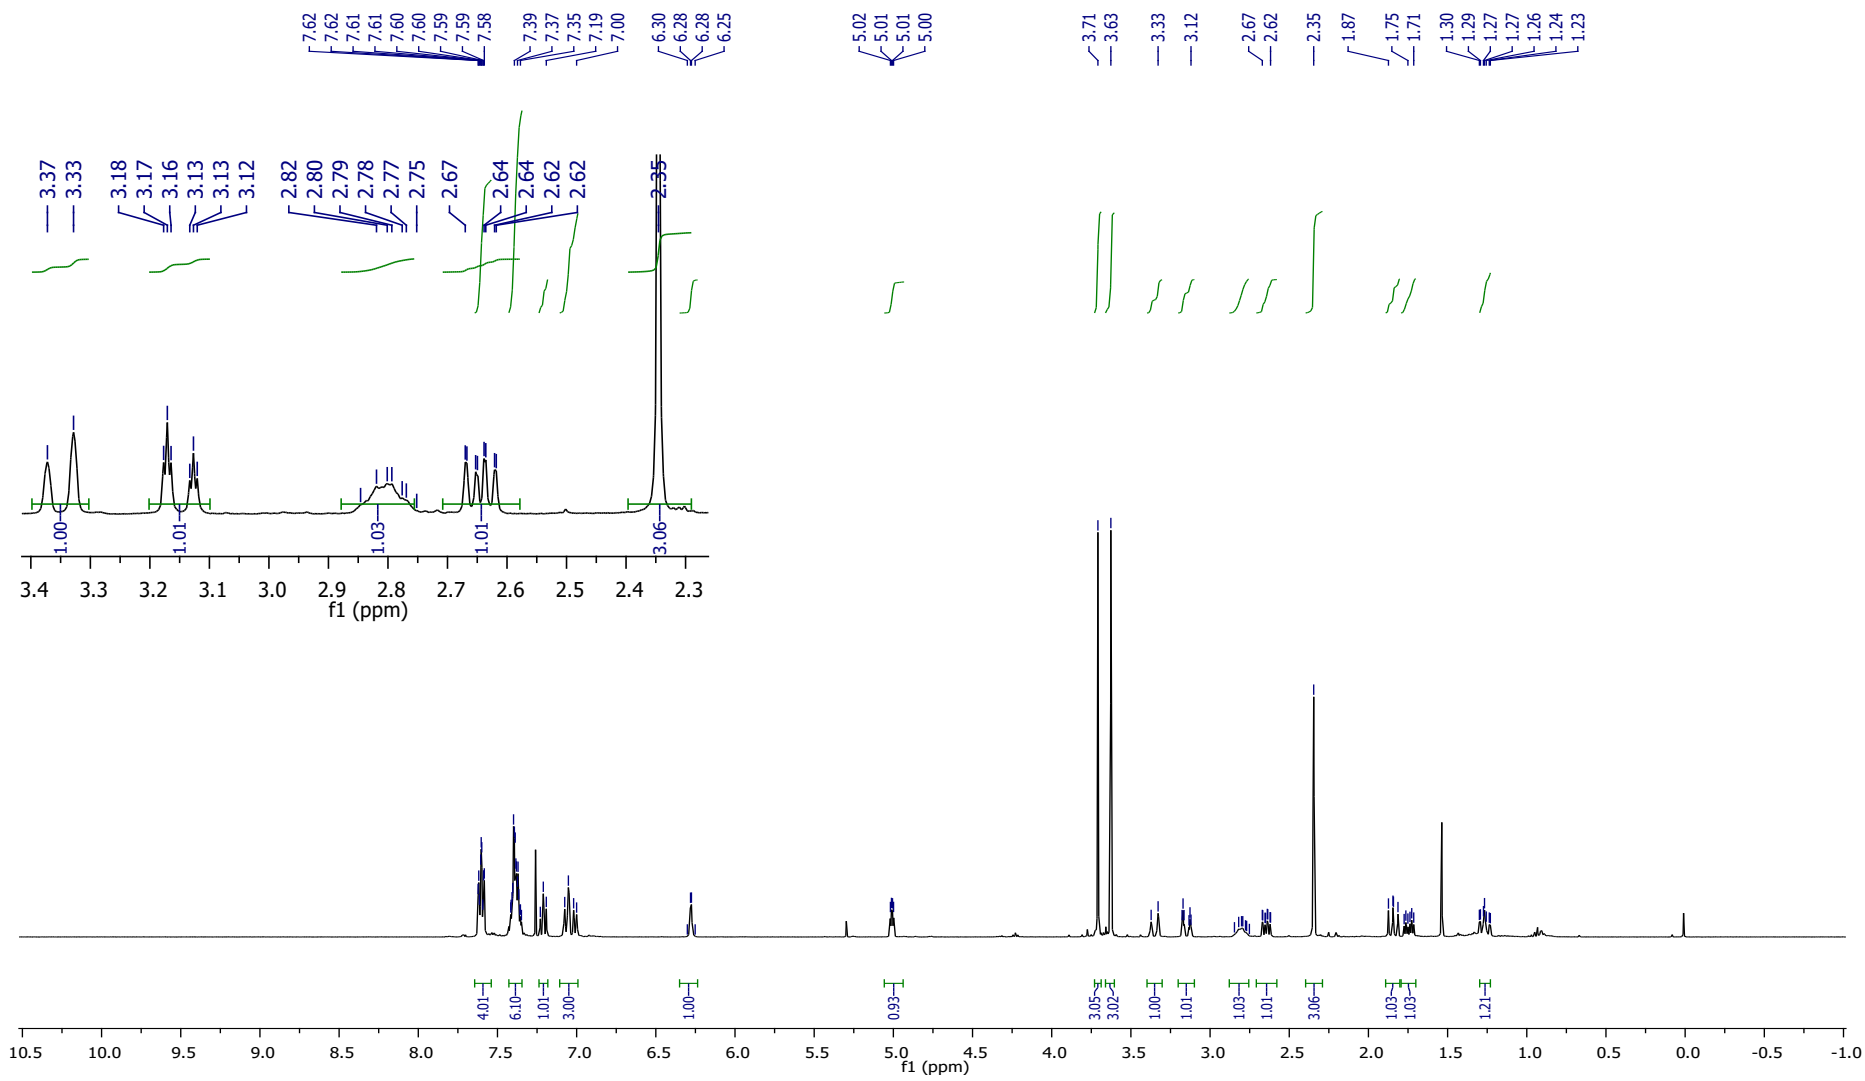

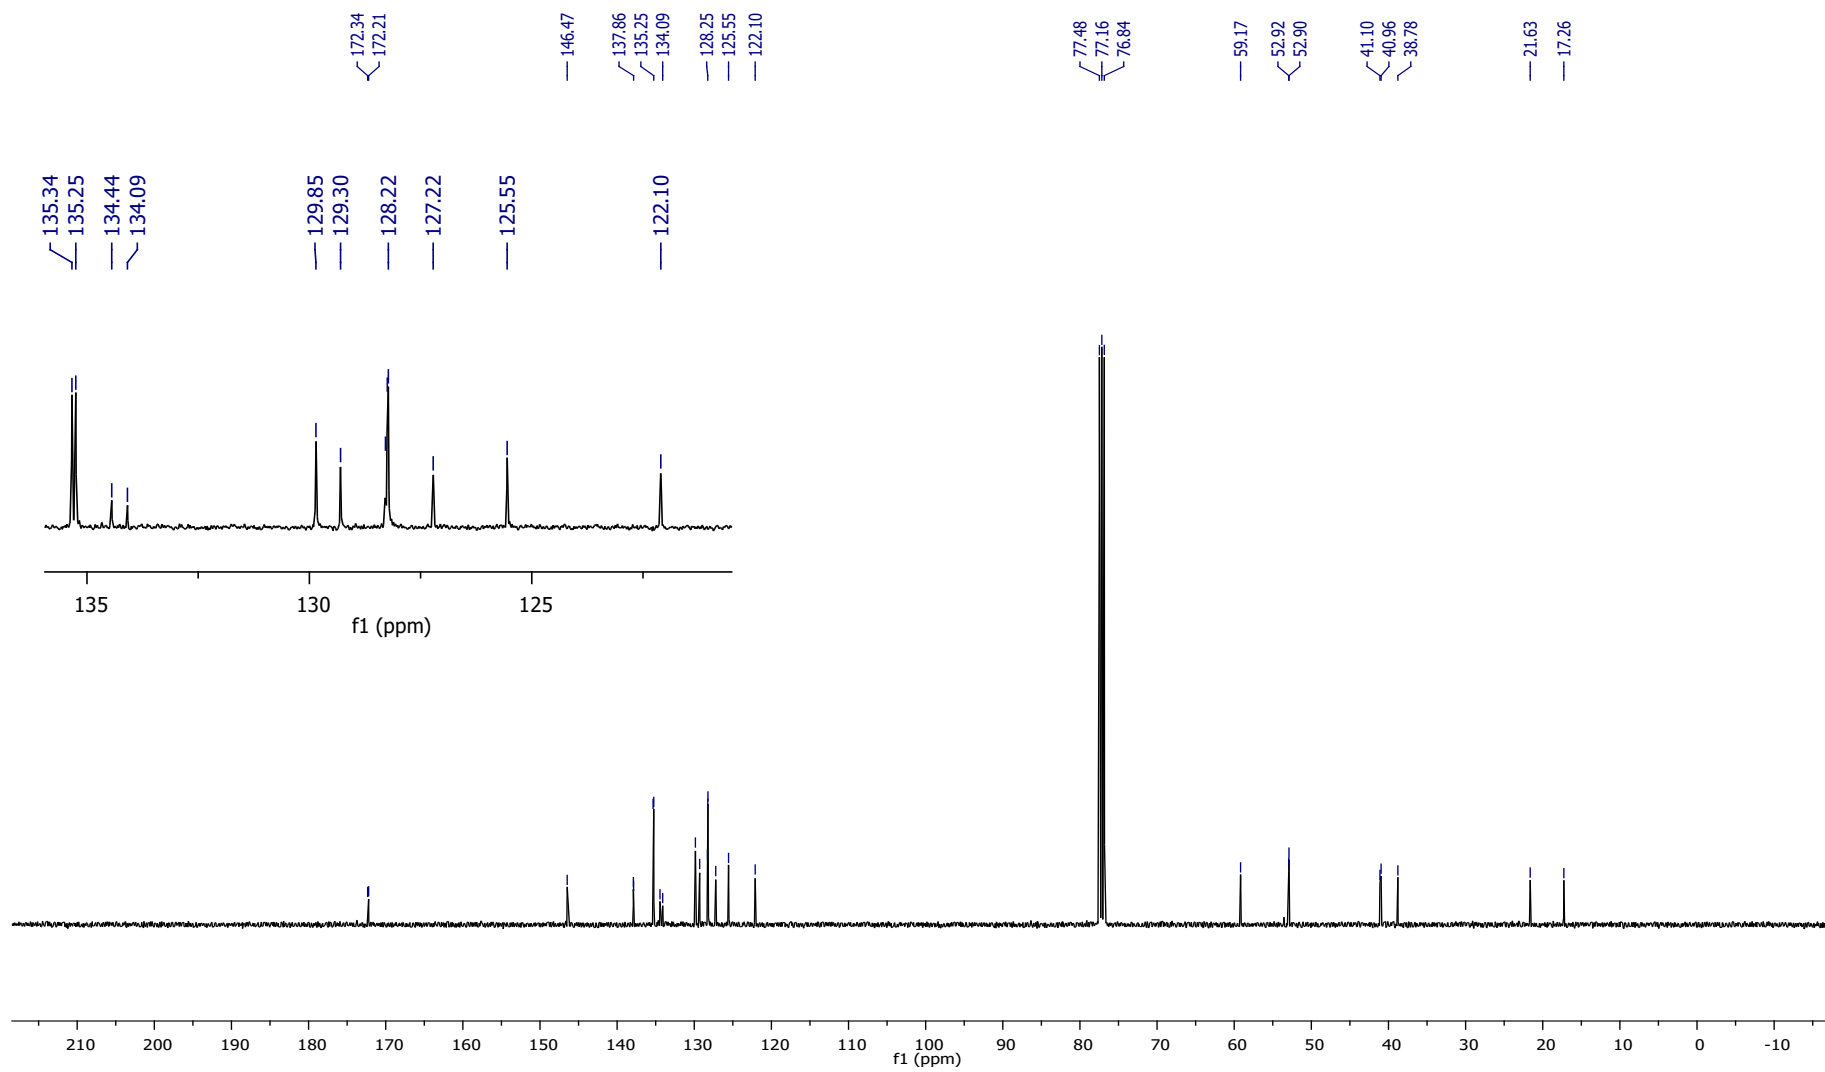

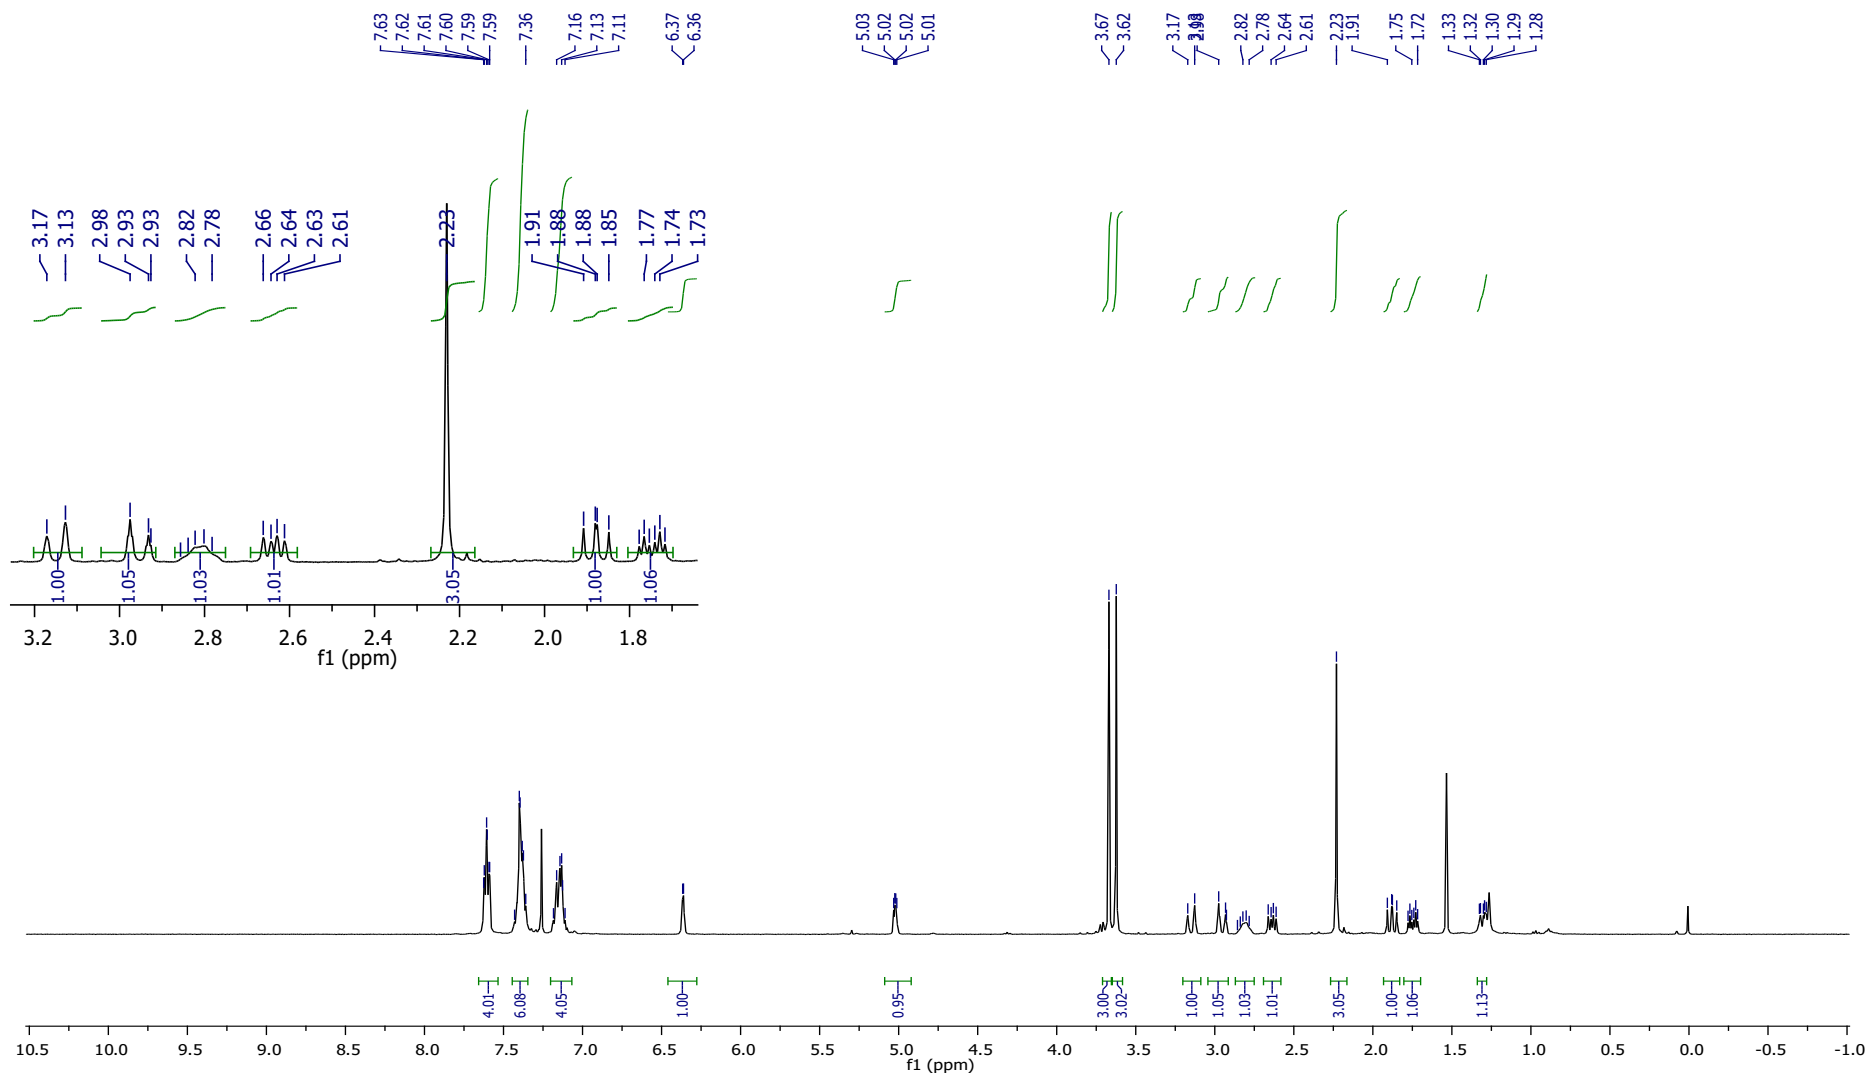

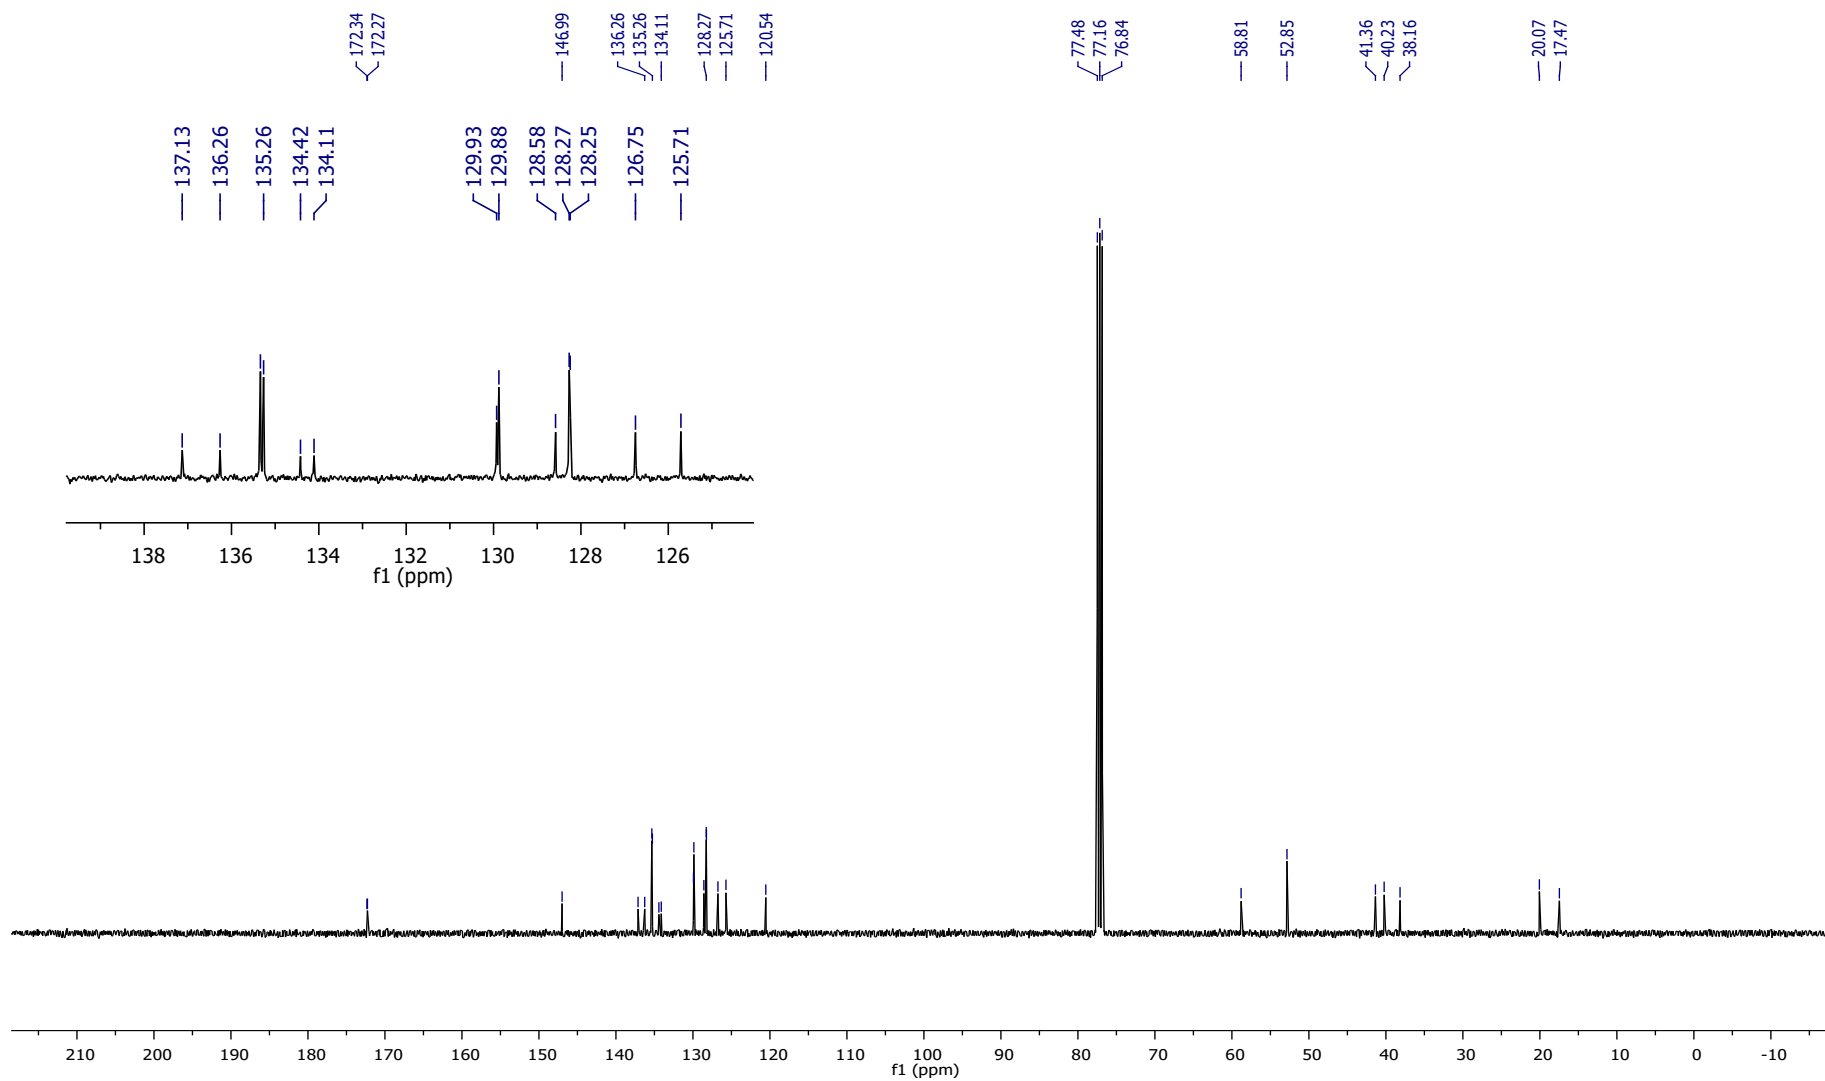

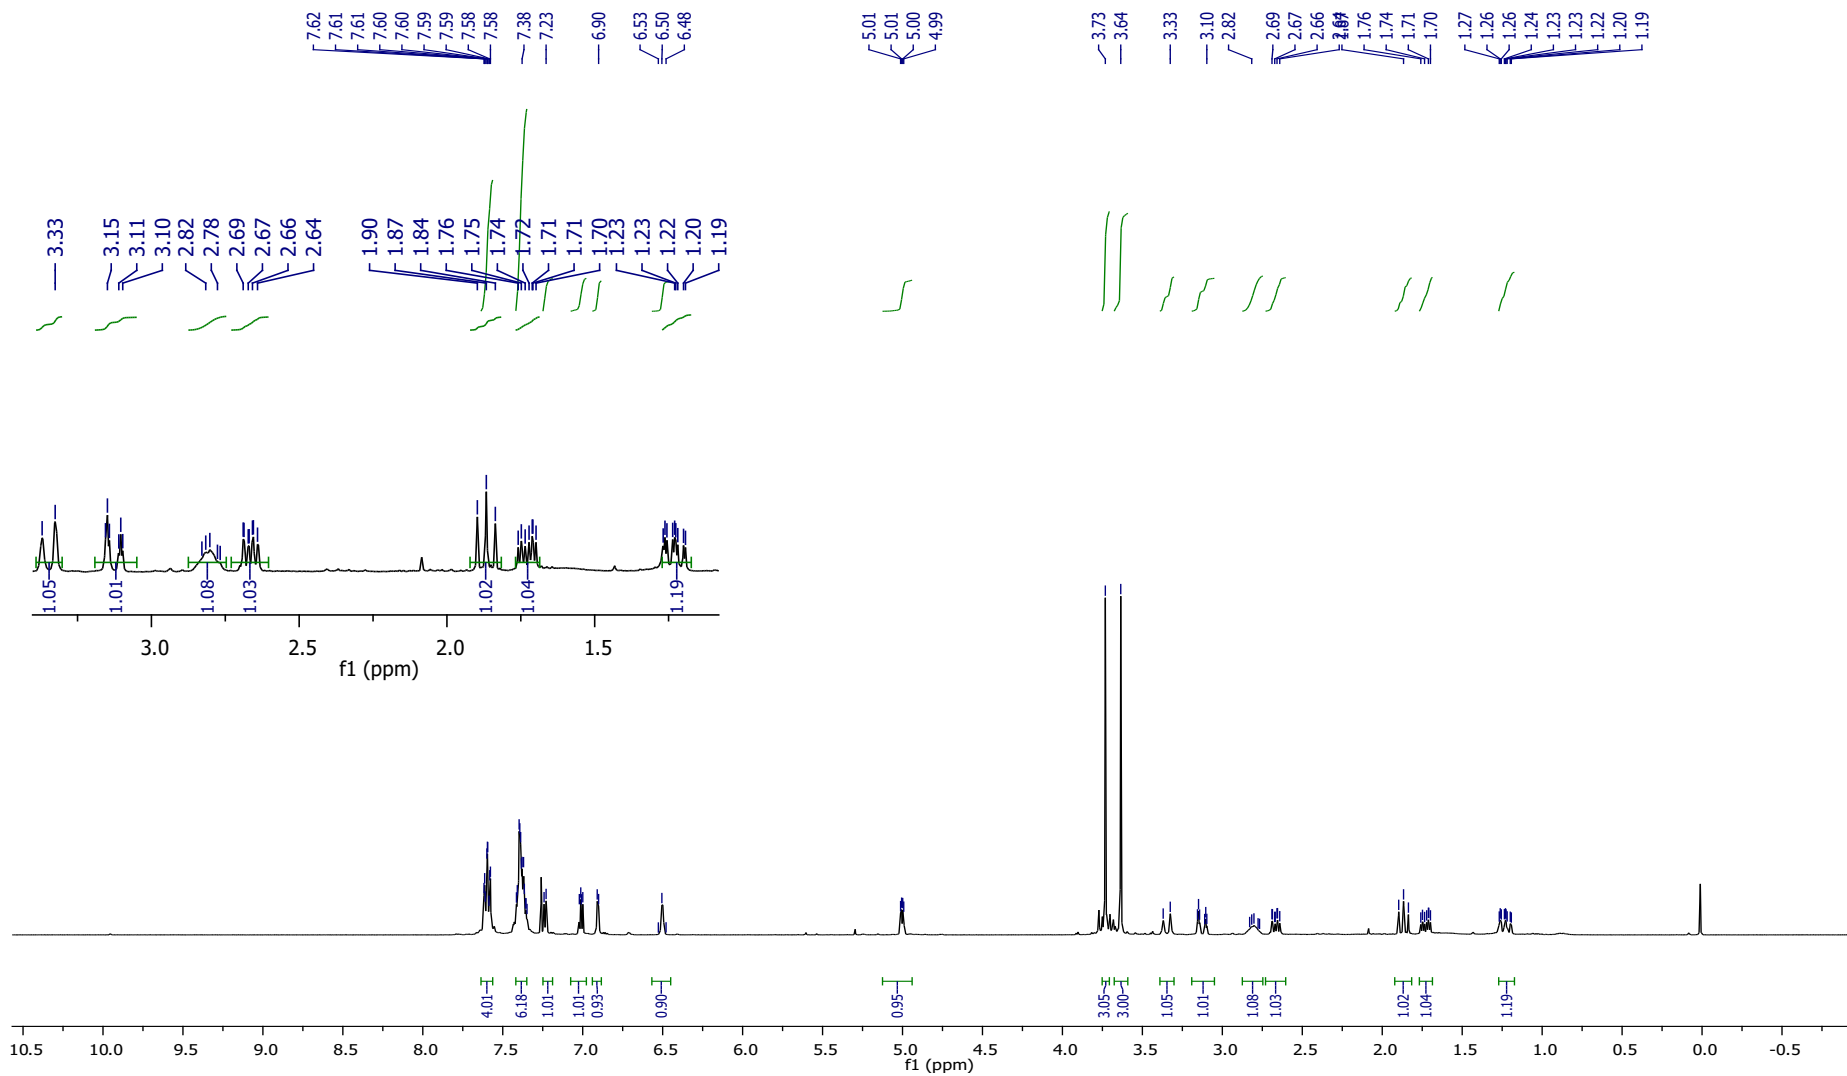

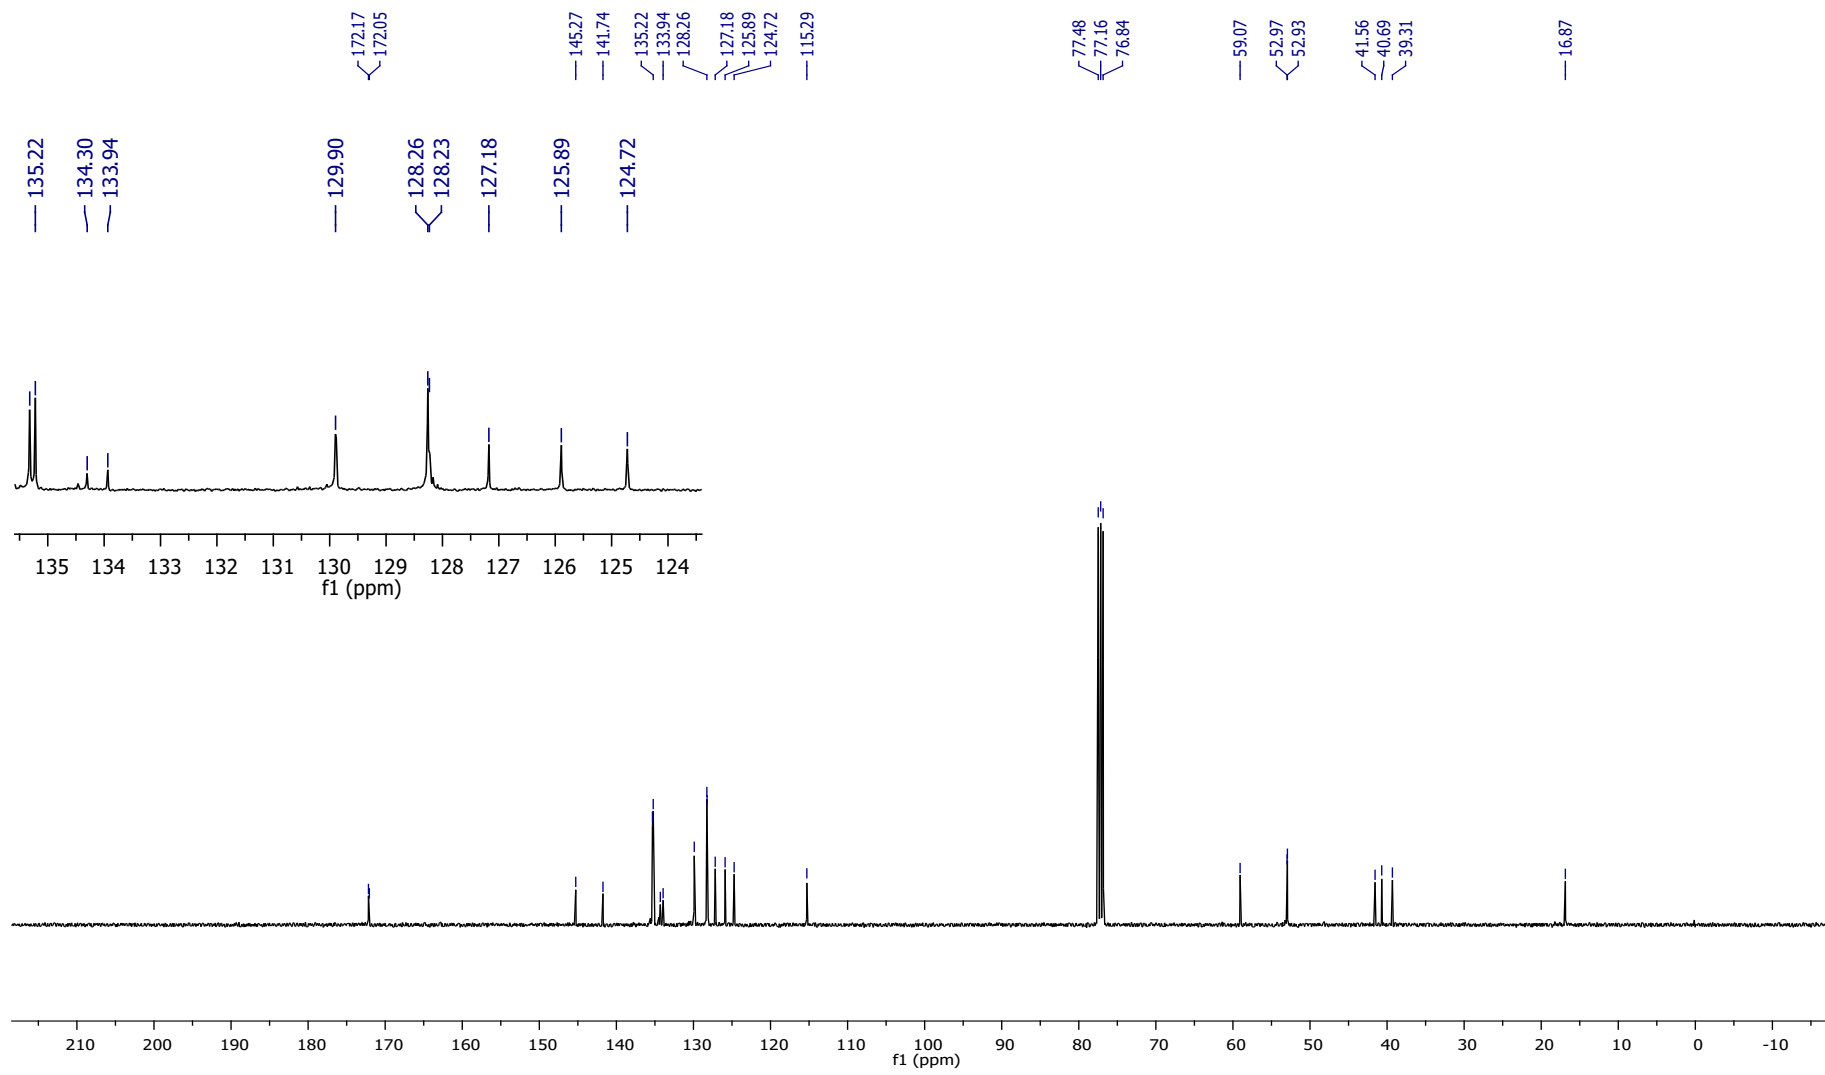

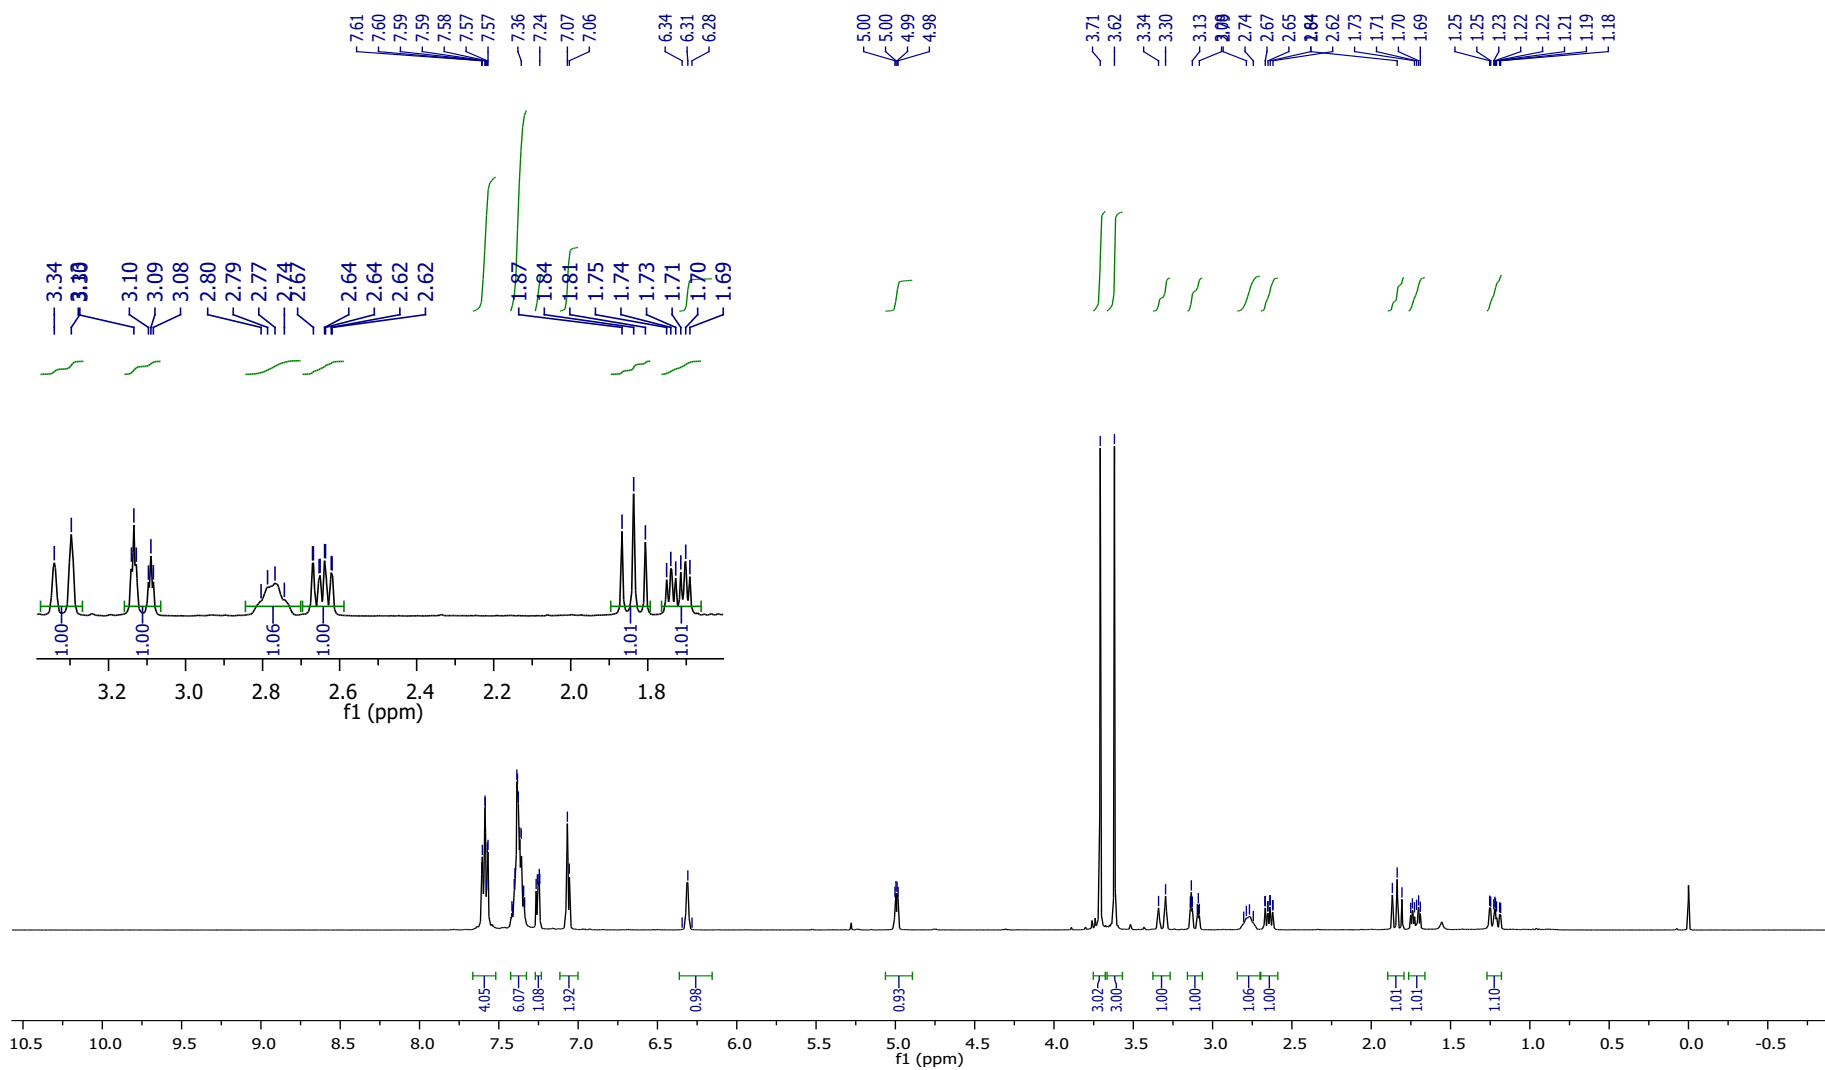

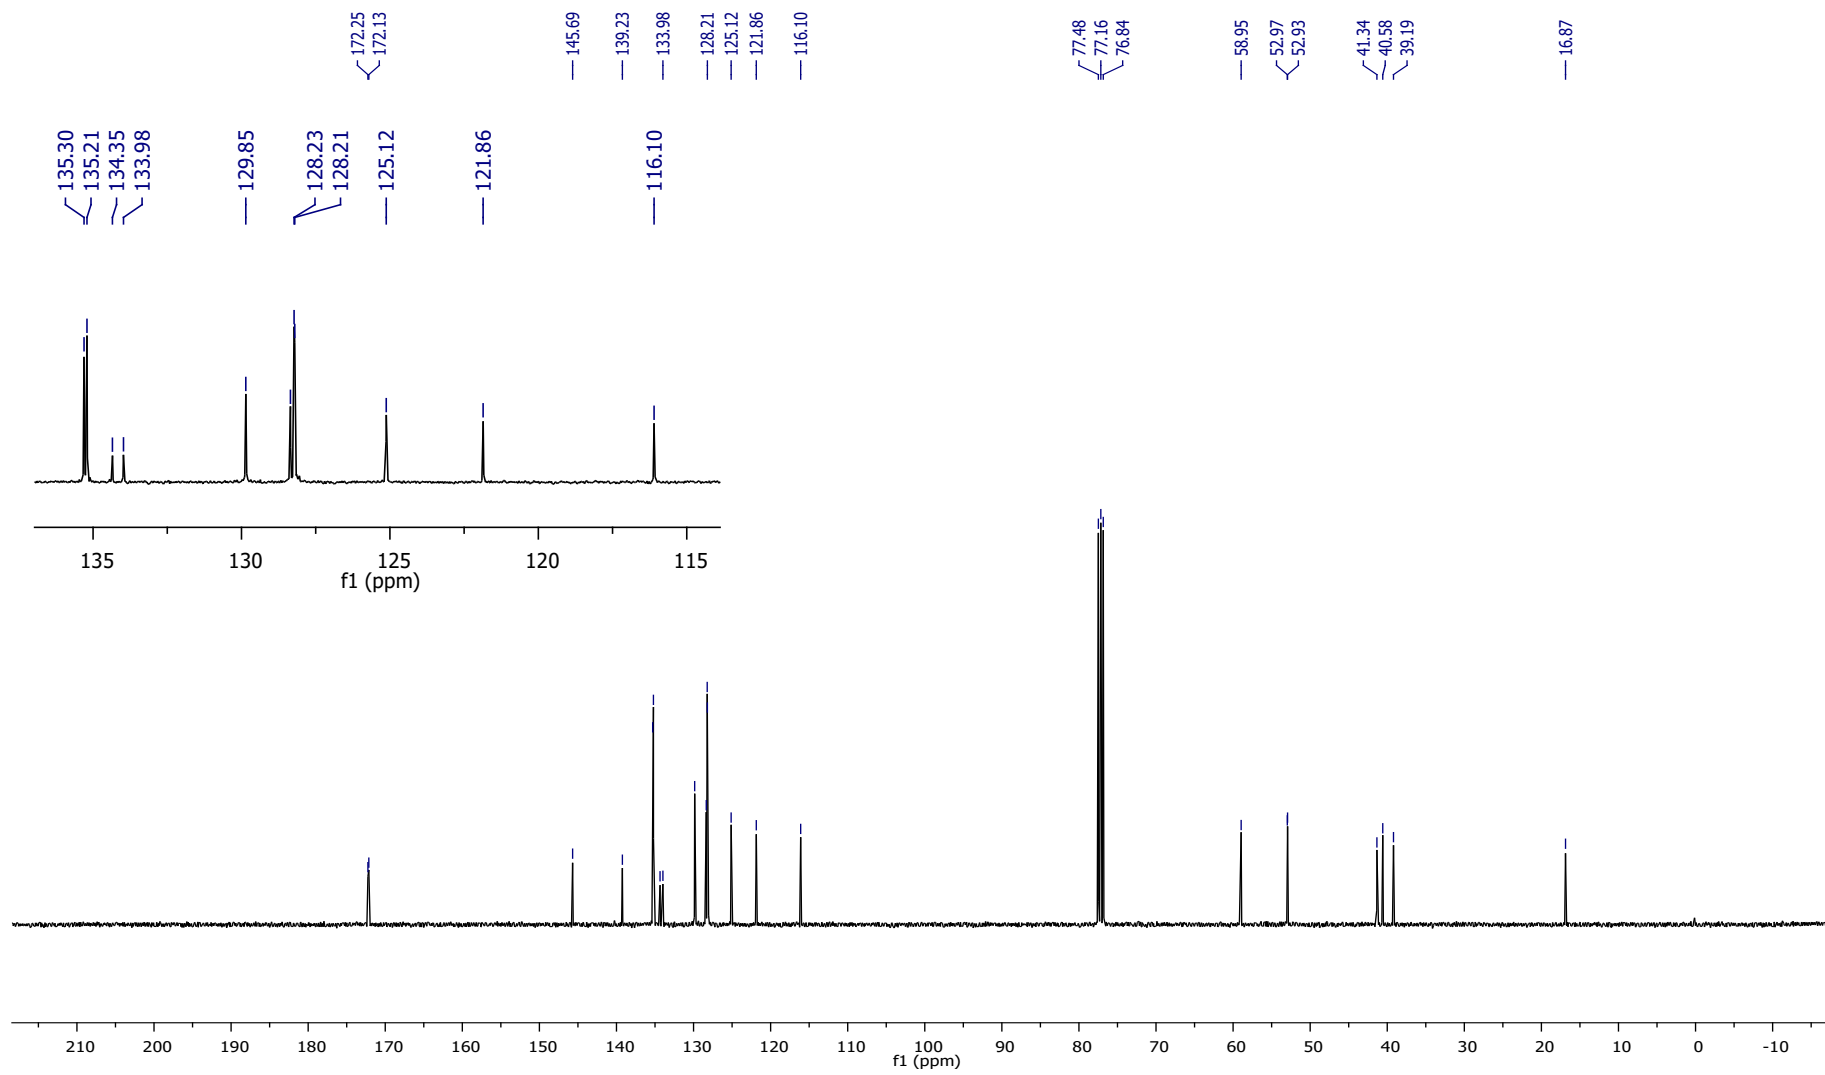



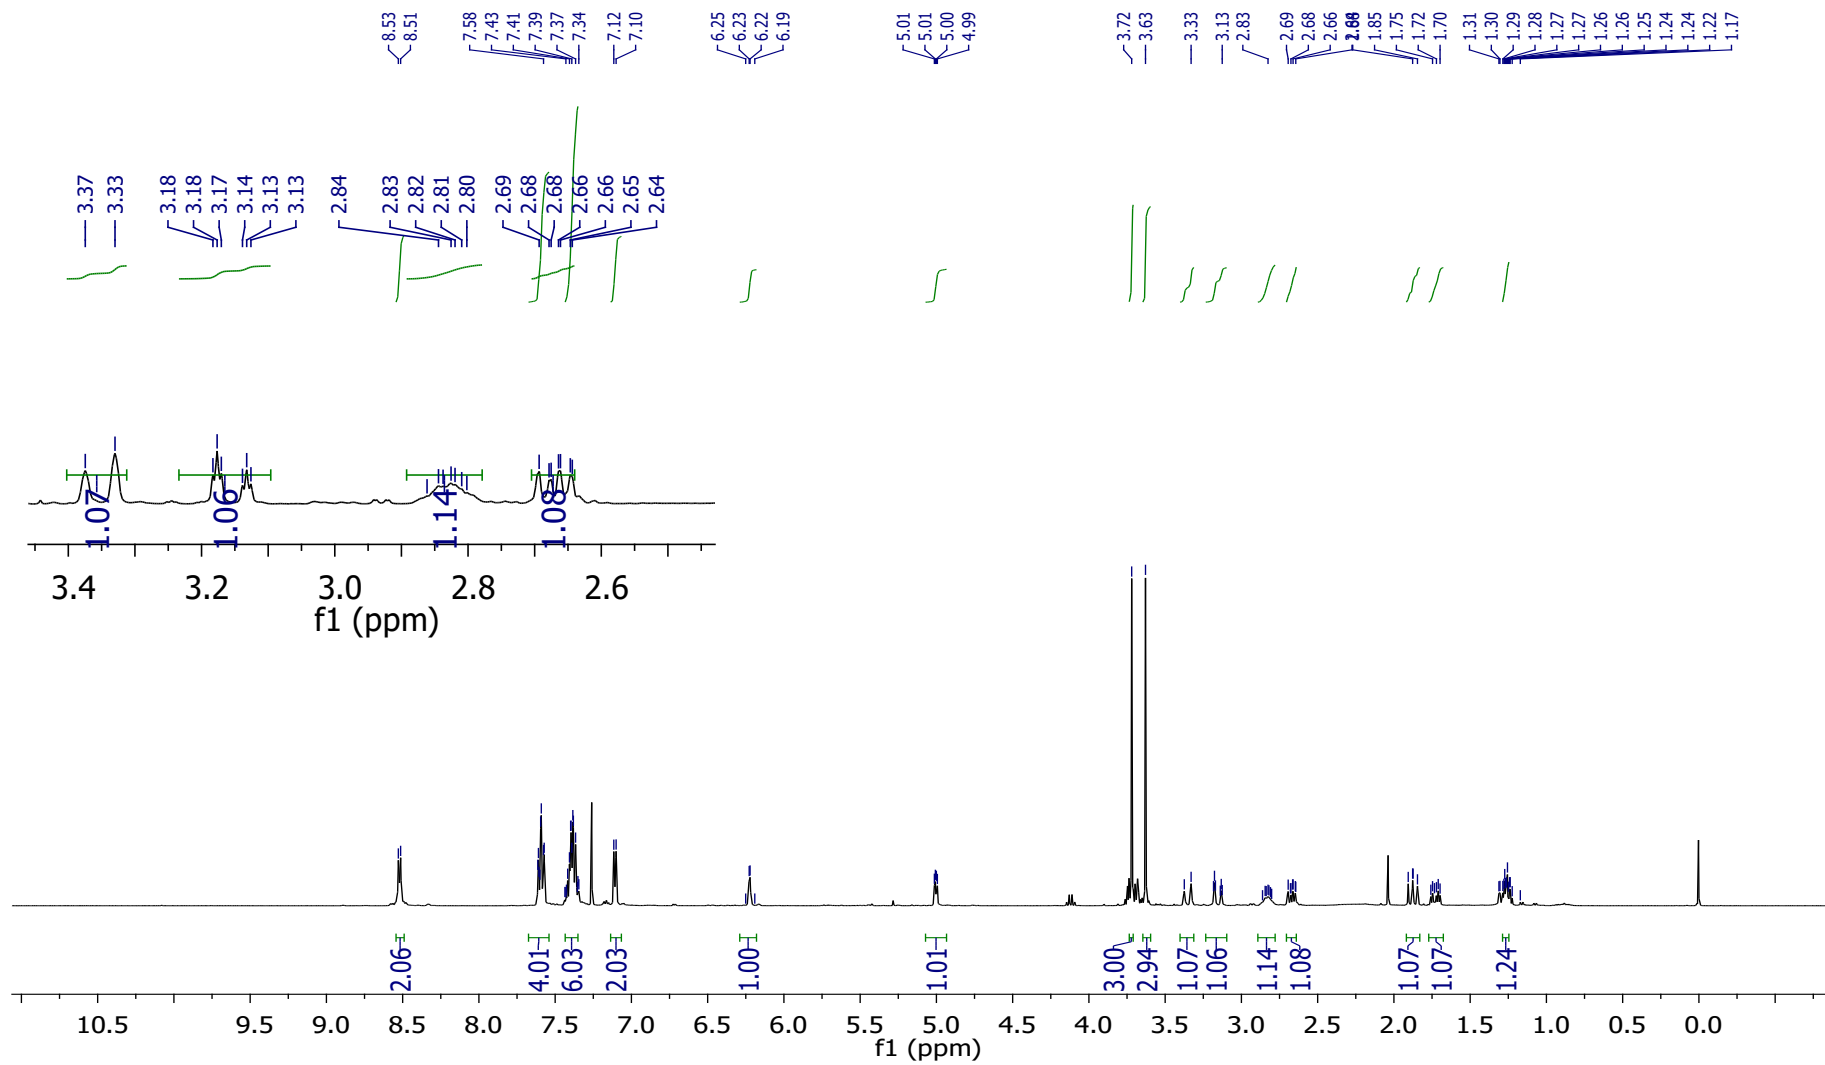

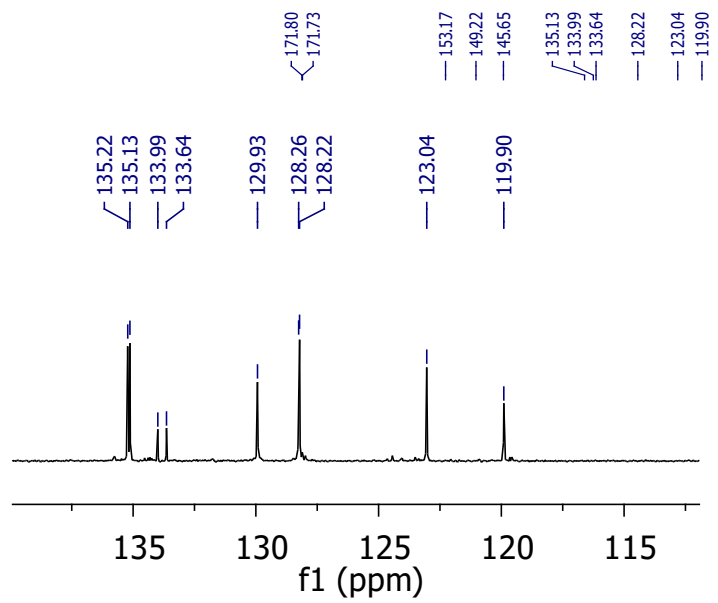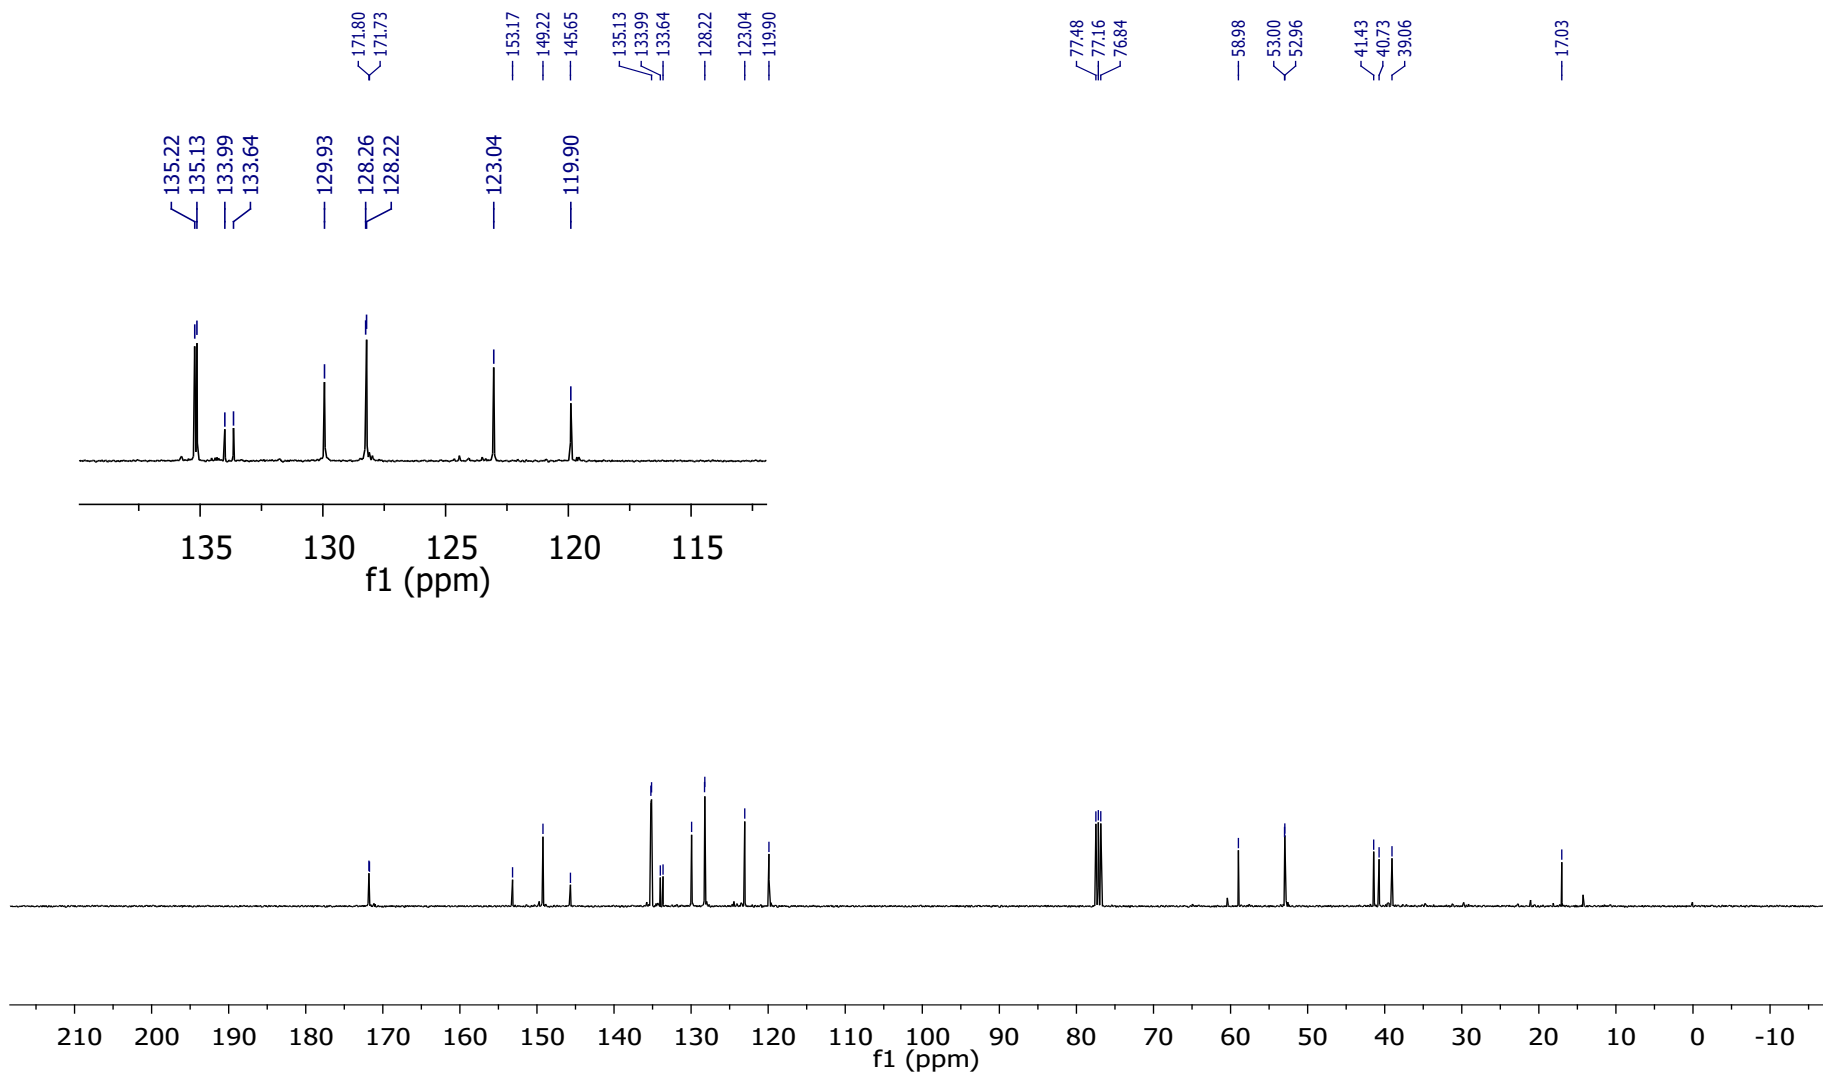

7.62 7.61 7.61 7.59 7.59 7.58 7.57 7.57 7.56 7.55 7.55 7.54 7.54 7.43 7.43 7.43 7.42 7.41 7.40 7.40 7.39 7.38 7.37 7.36 7.35 7.34

6.40 6.39 6.39 6.38

6.19 6.18 6.17 6.16

5.01 5.00 5.00 4.99

3.73 3.64

3.39

3.20 3.19 3.18 3.15 2.66 2.66

1.87 1.84 1.81 1.69

1.87 1.73 1.72 1.70 1.68

1.23 1.22 1.20 1.20 1.19 1.19 1.17 1.16

3.44 3.39 3.20 3.20 3.16 3.15 3.15 2.75 2.72 2.68 2.68 2.66 2.66 2.65 2.65 2.63 2.63

1.87 1.84 1.81 1.69

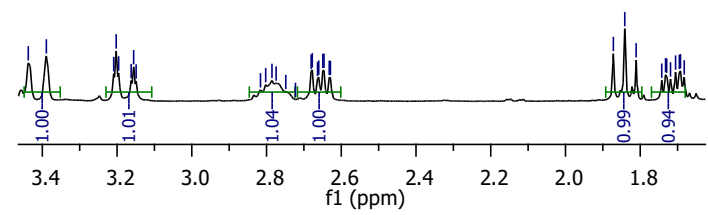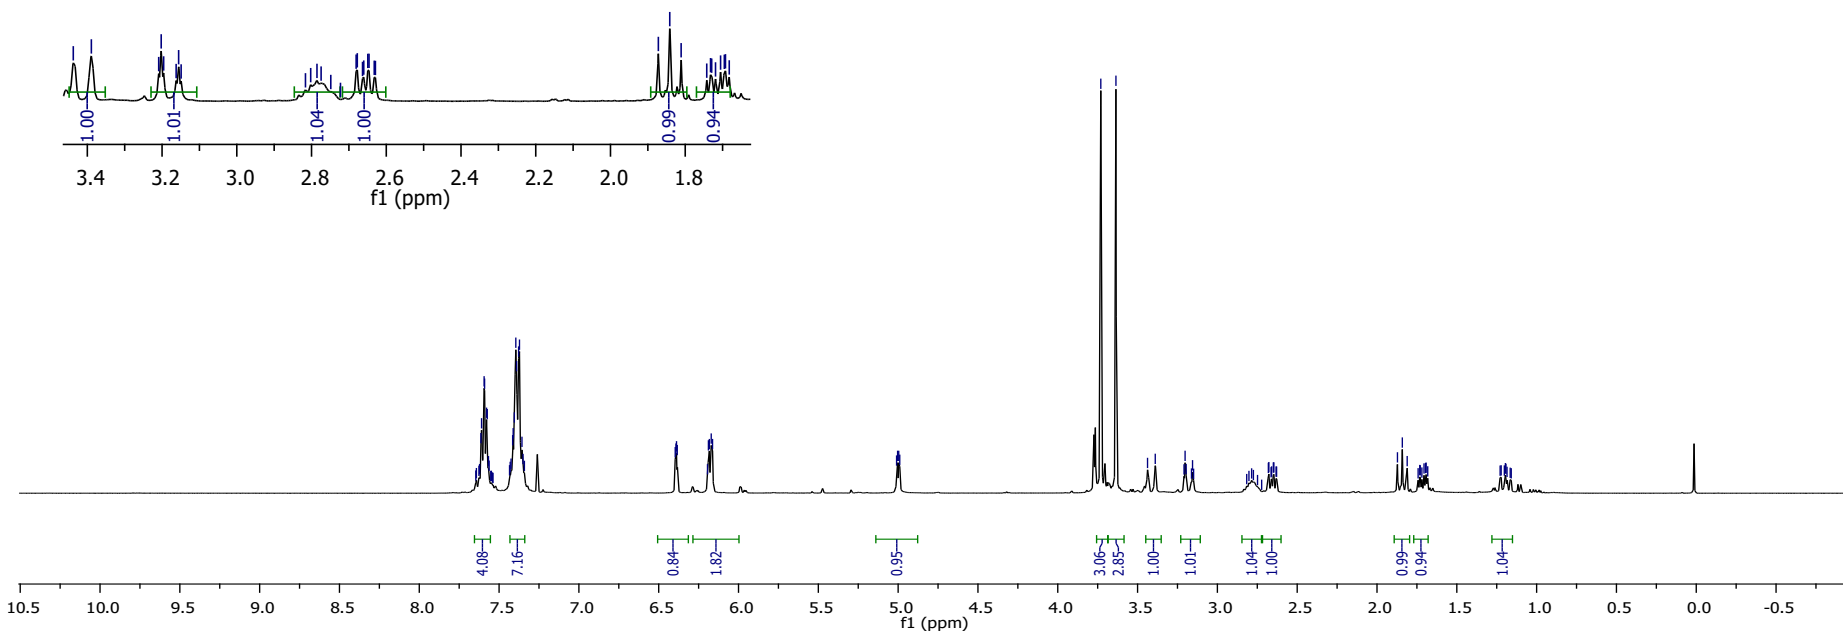

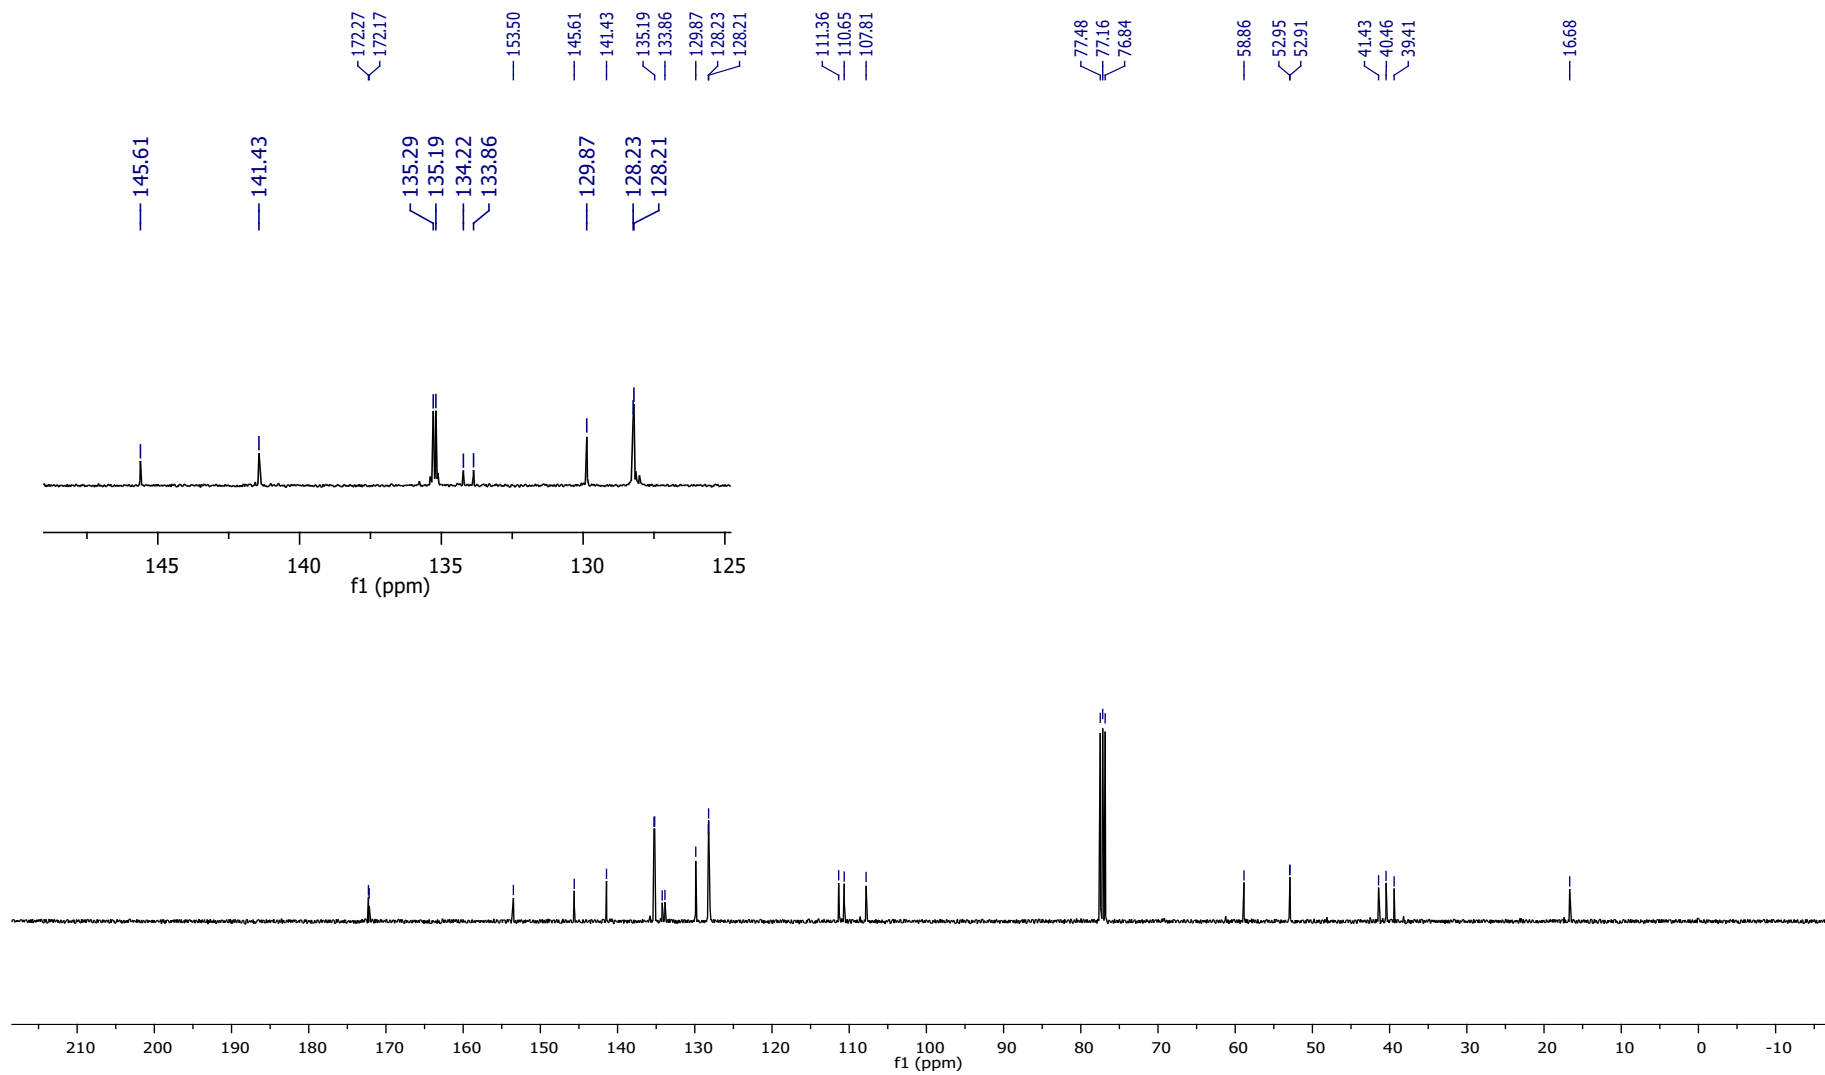

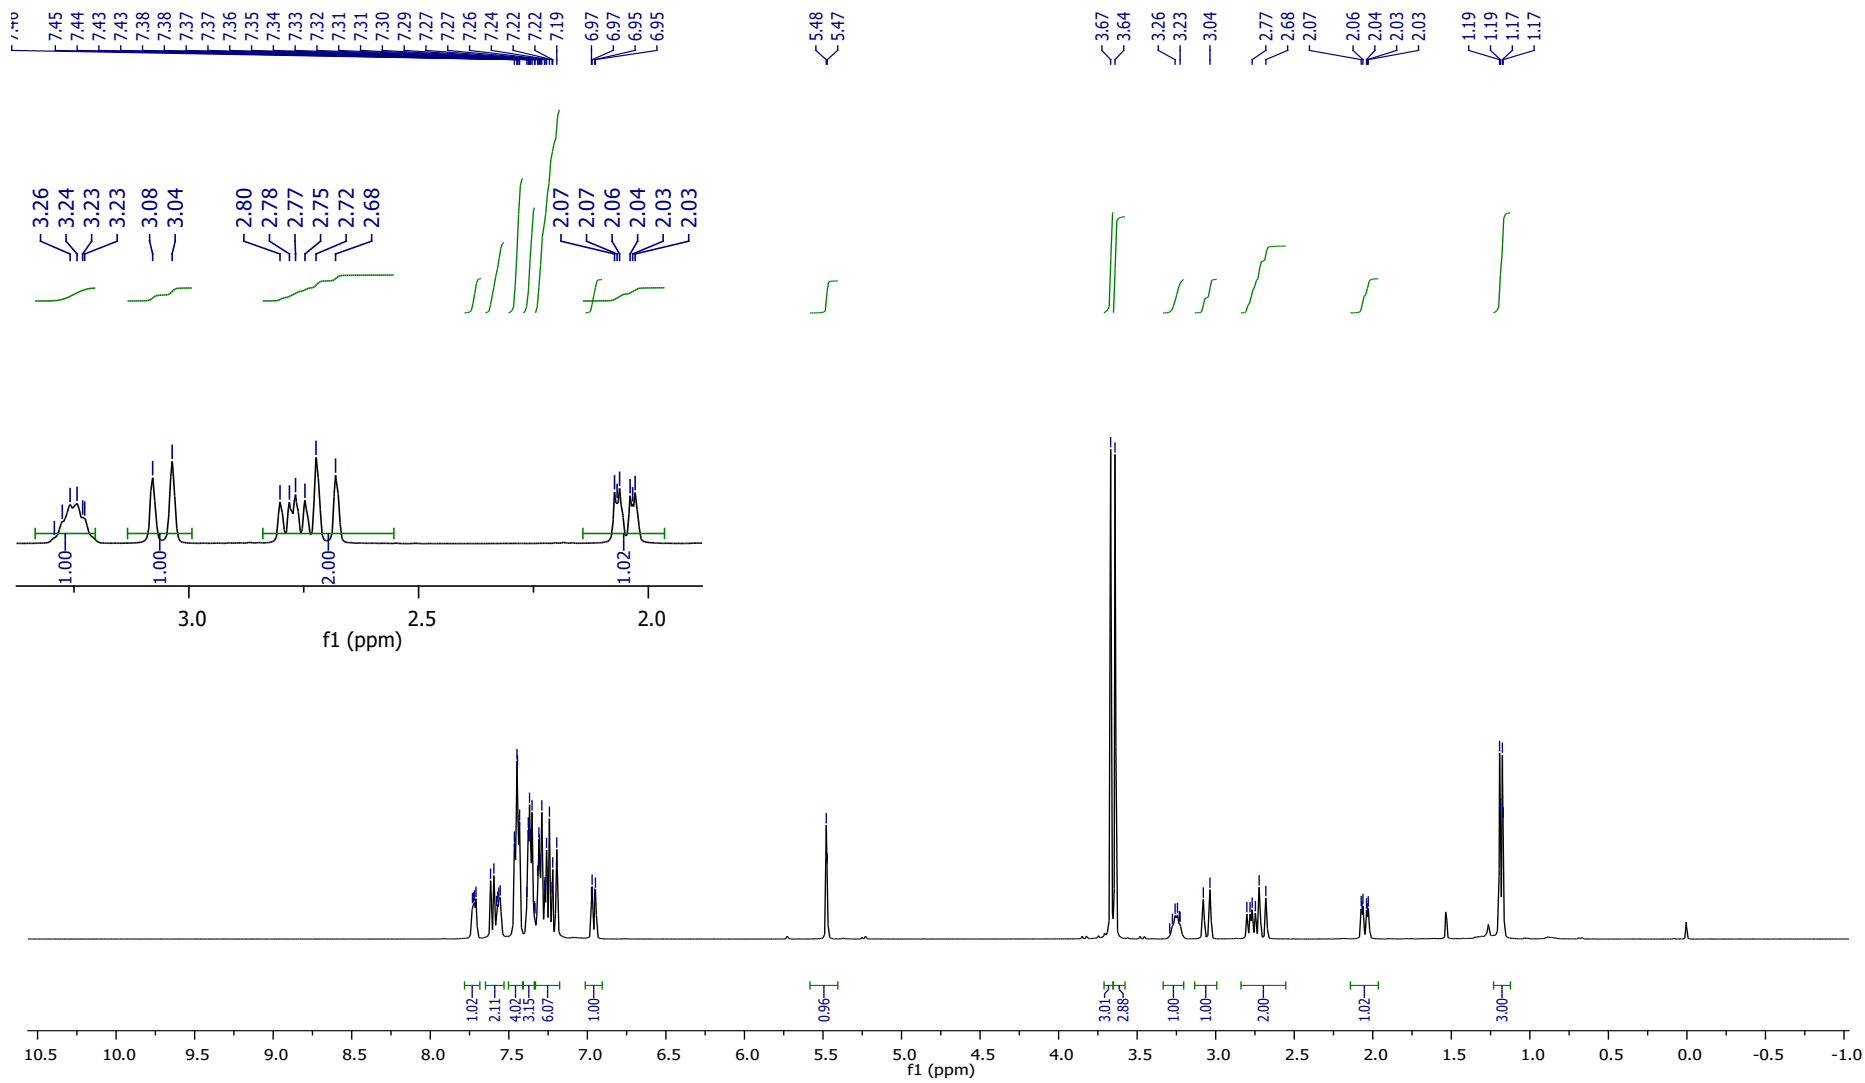

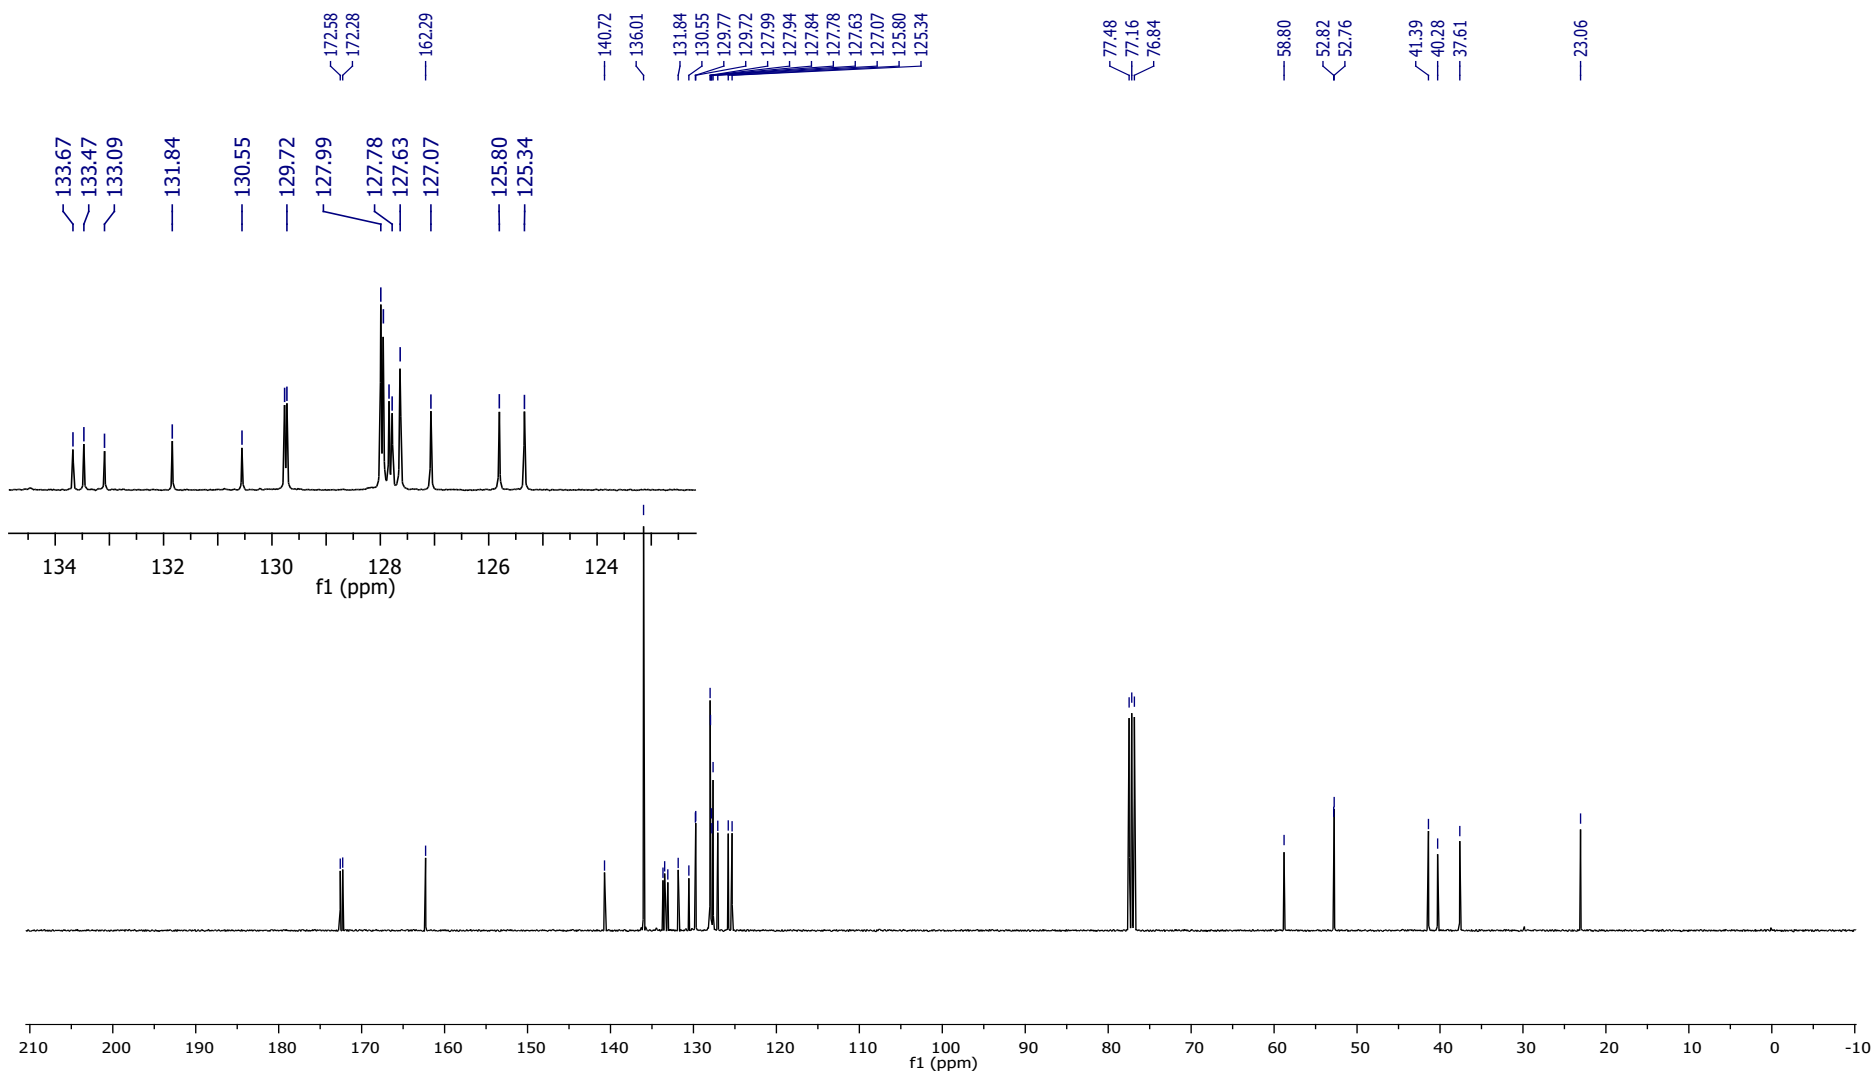

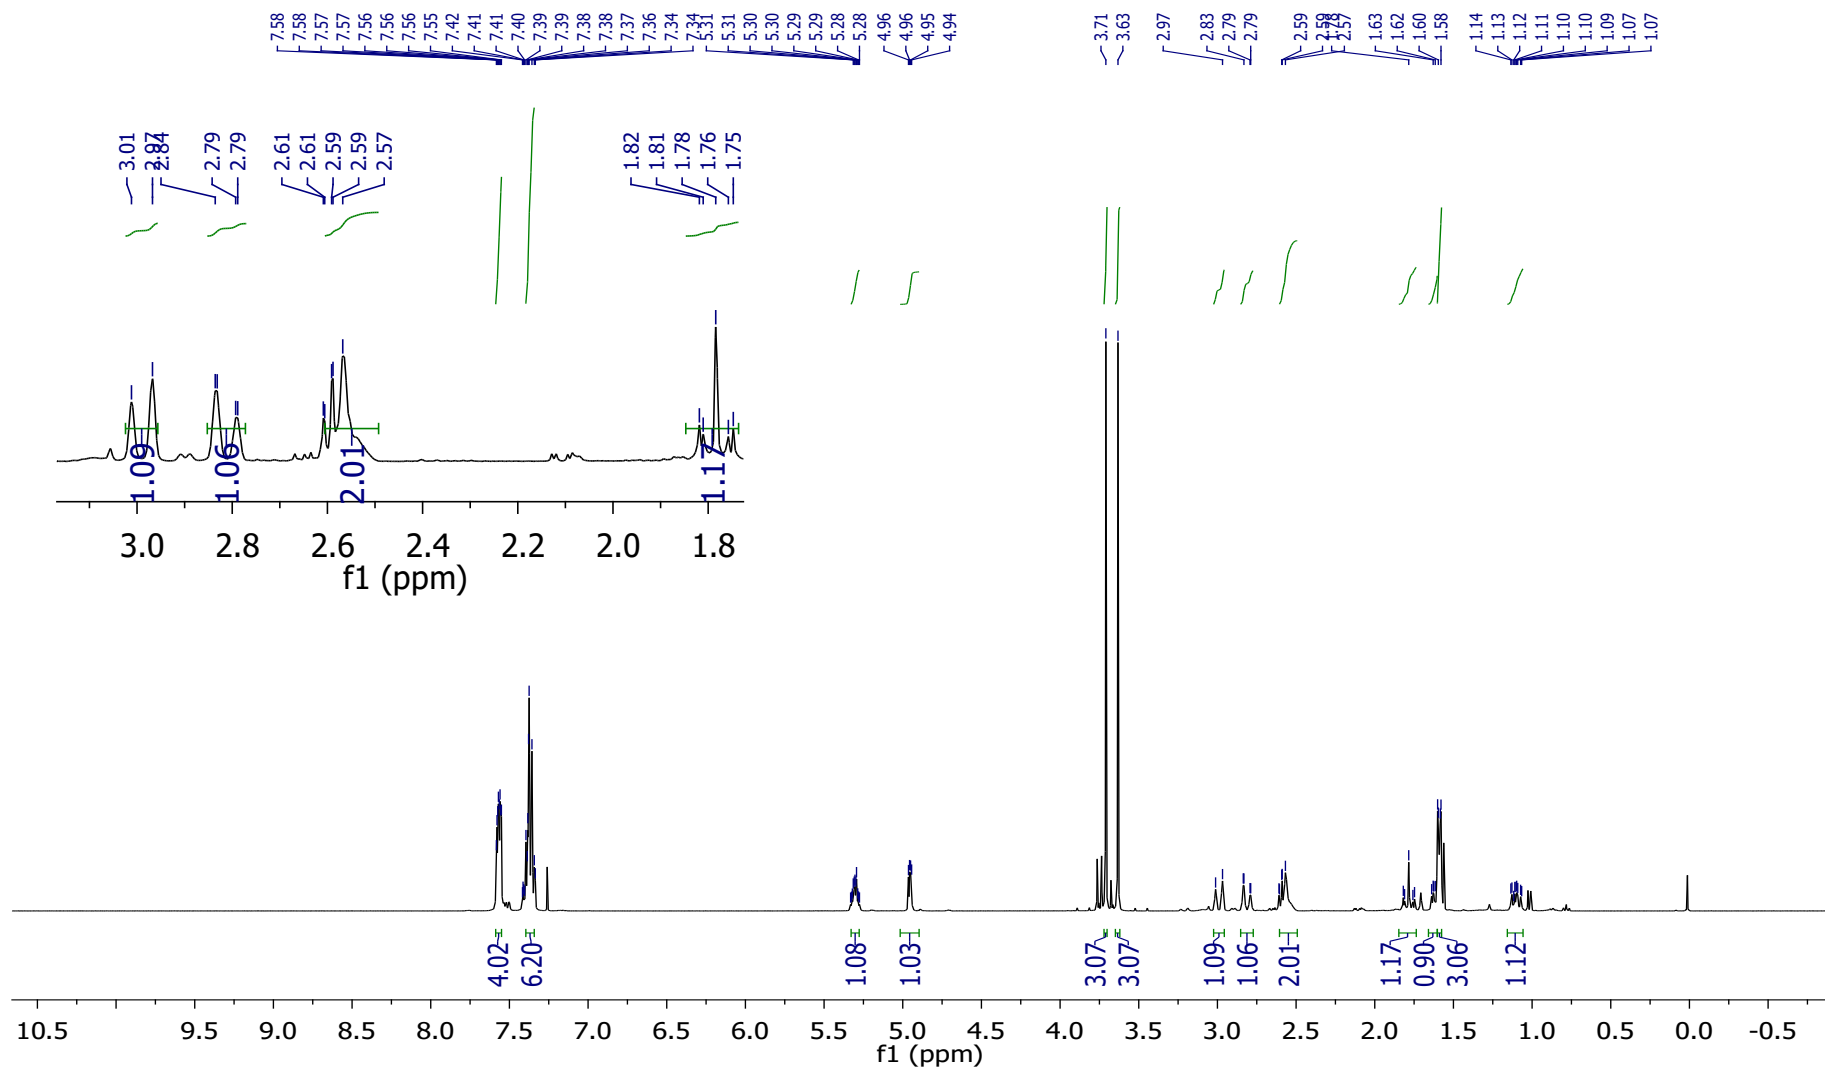

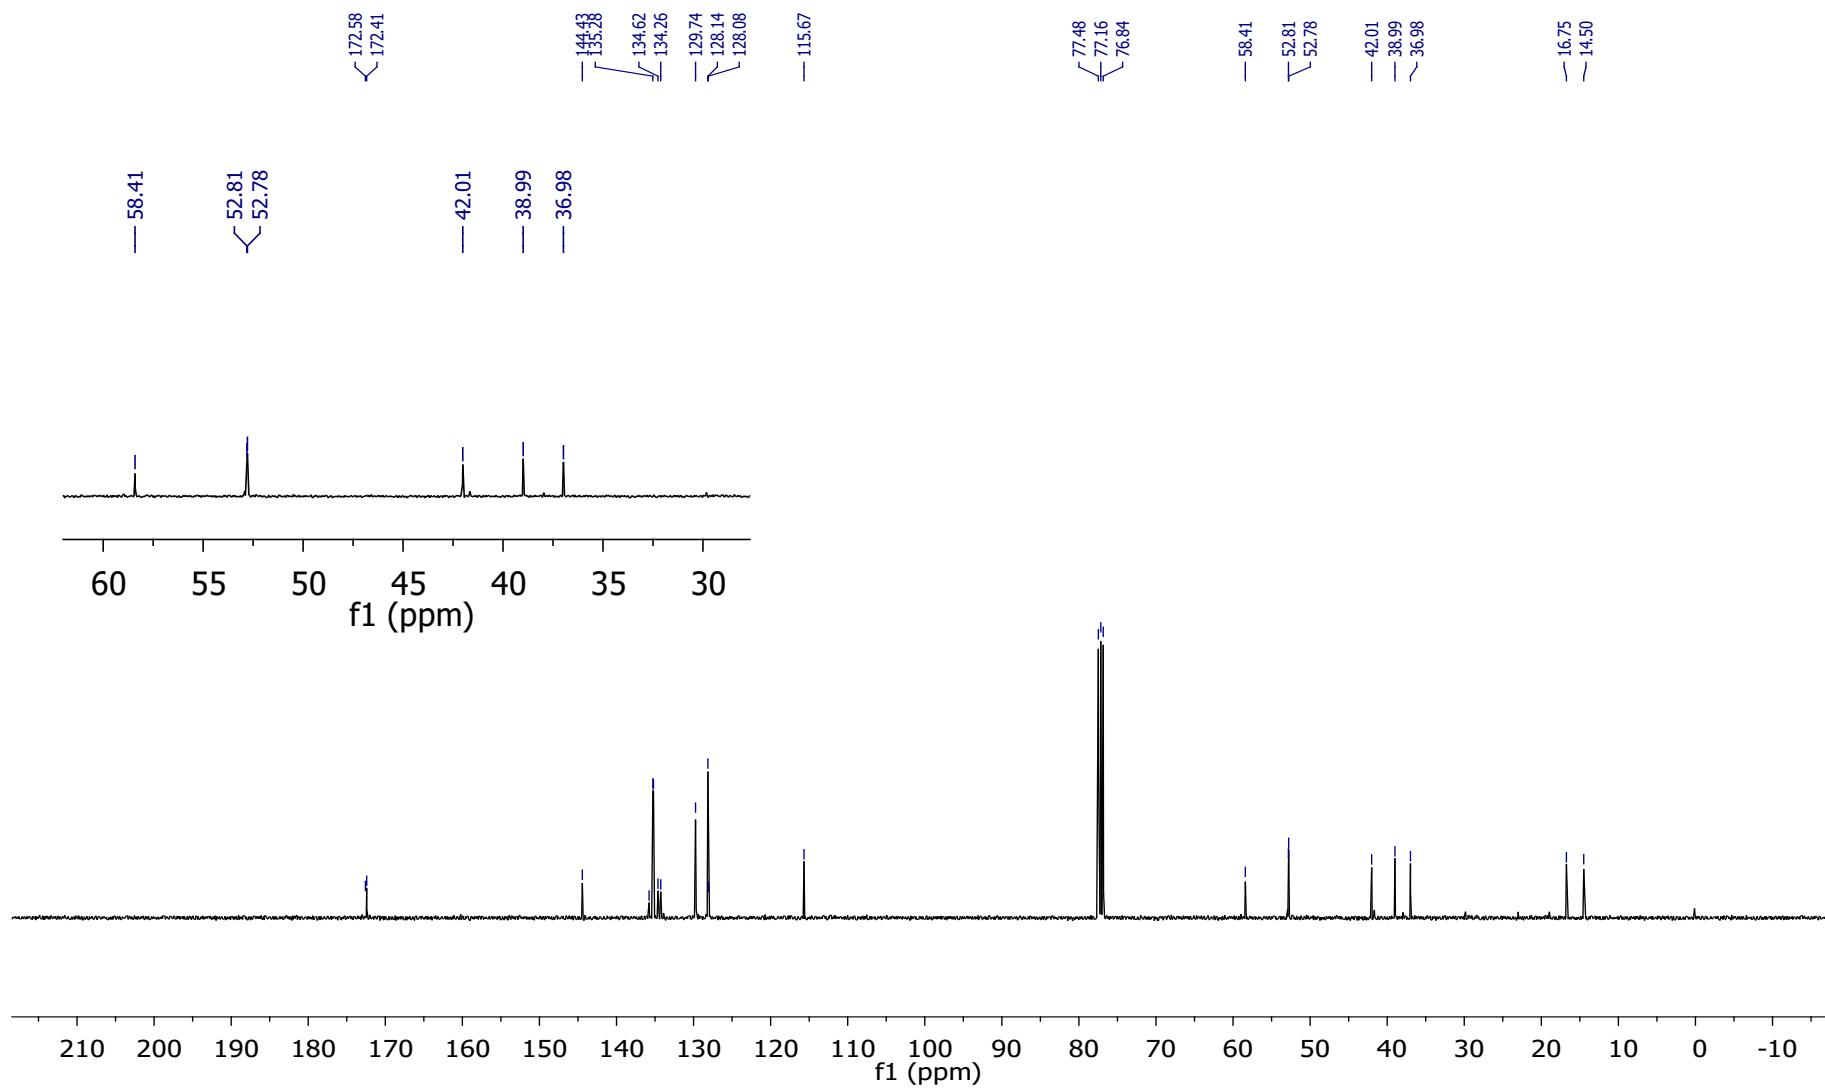



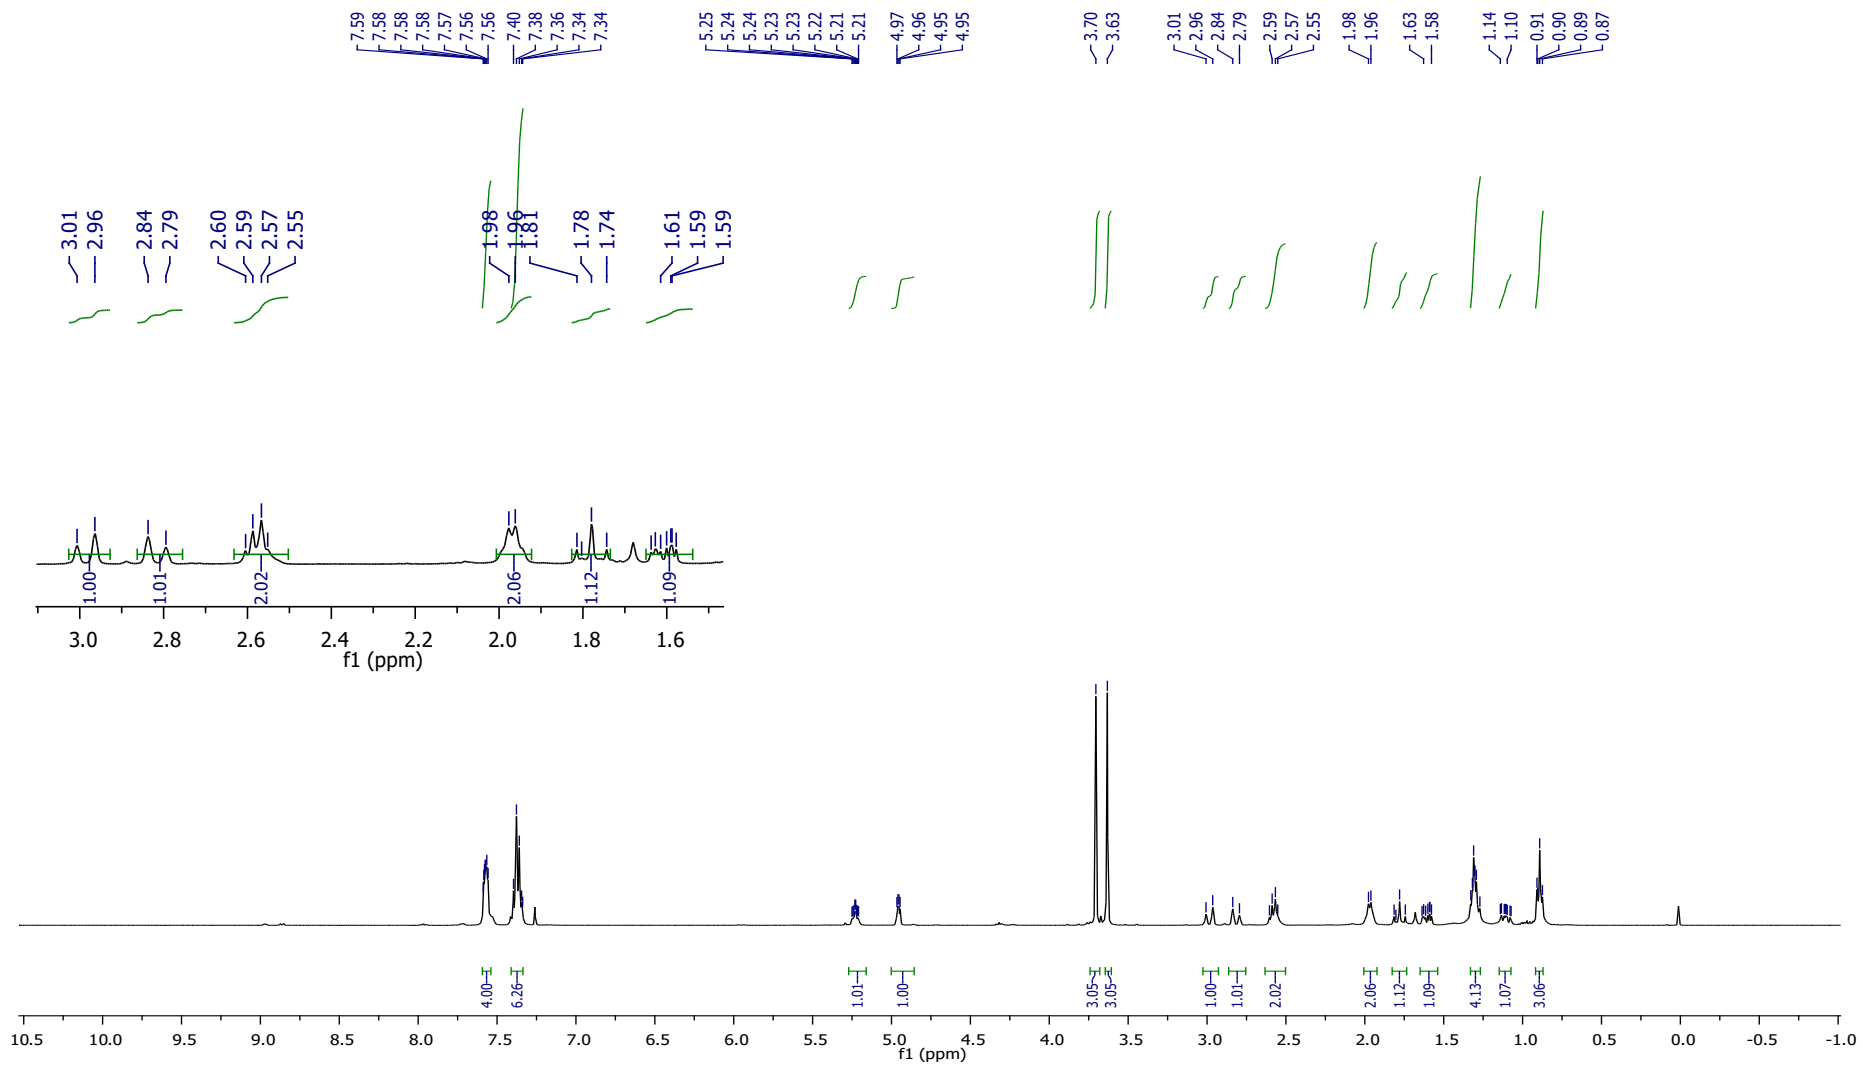

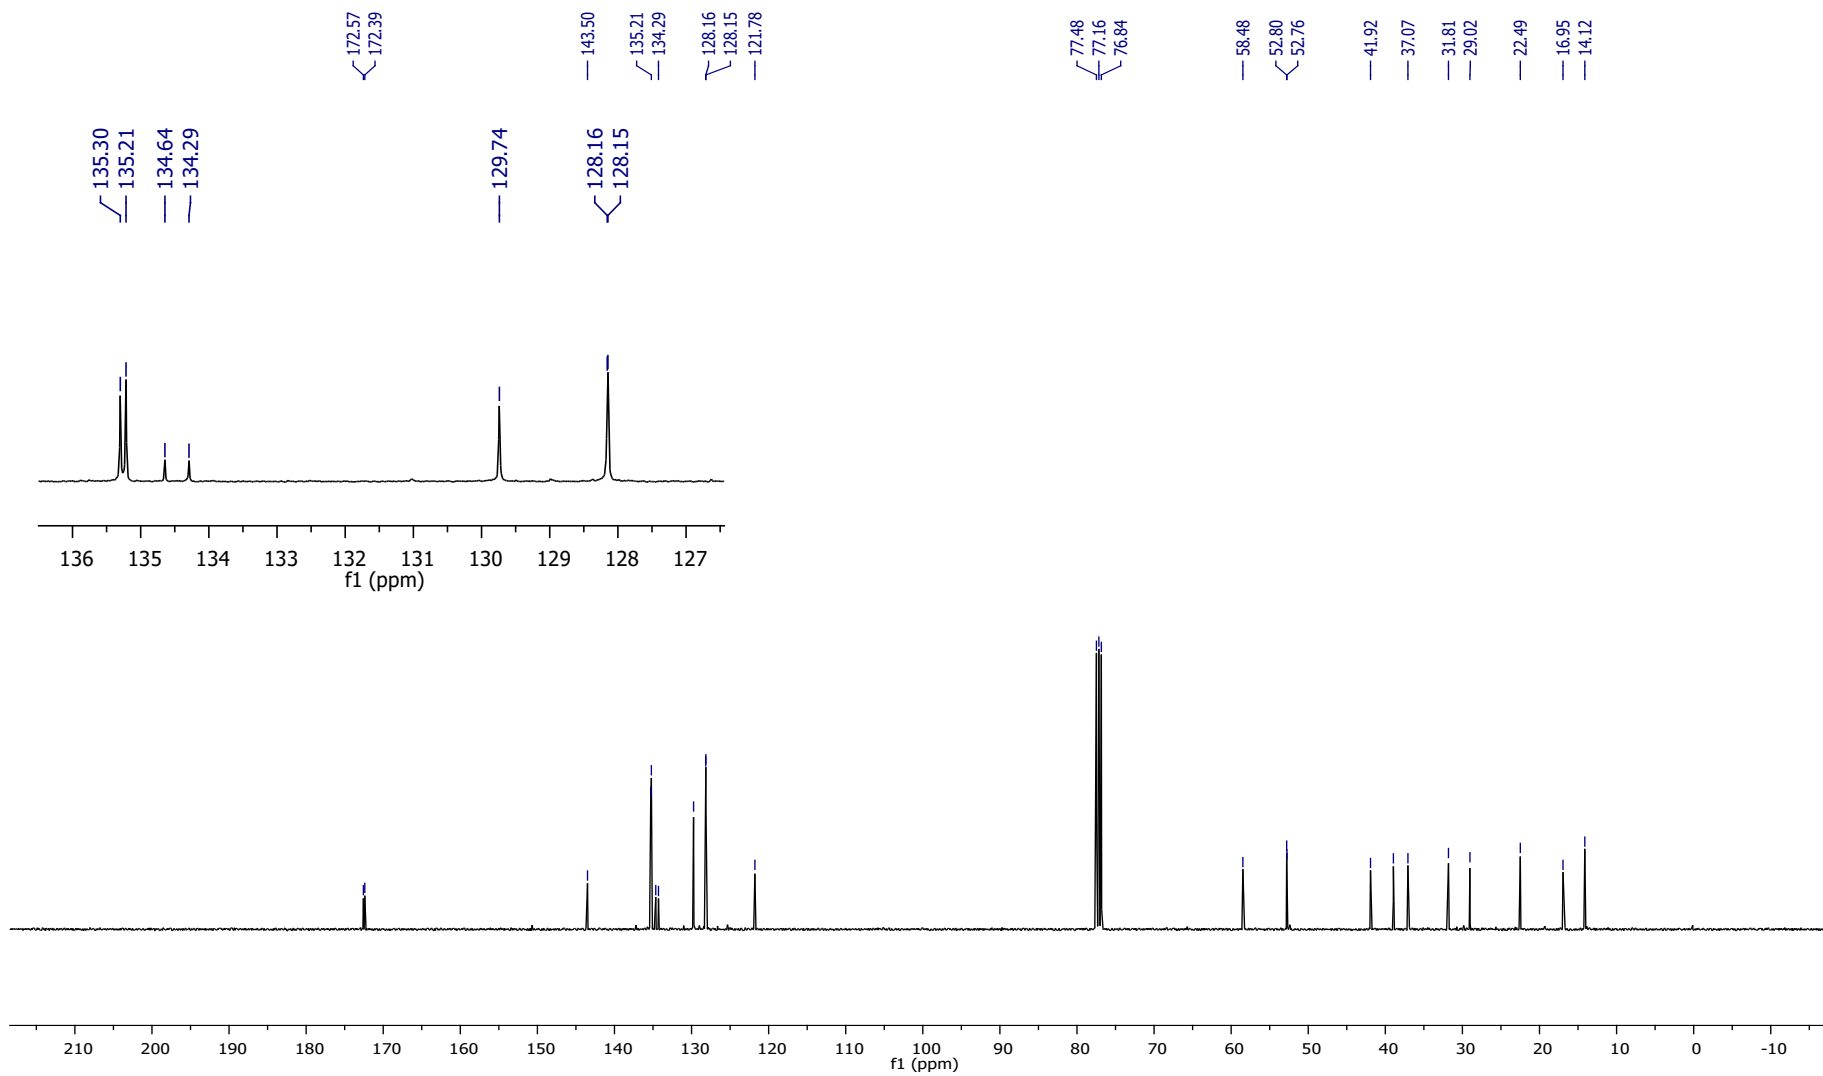

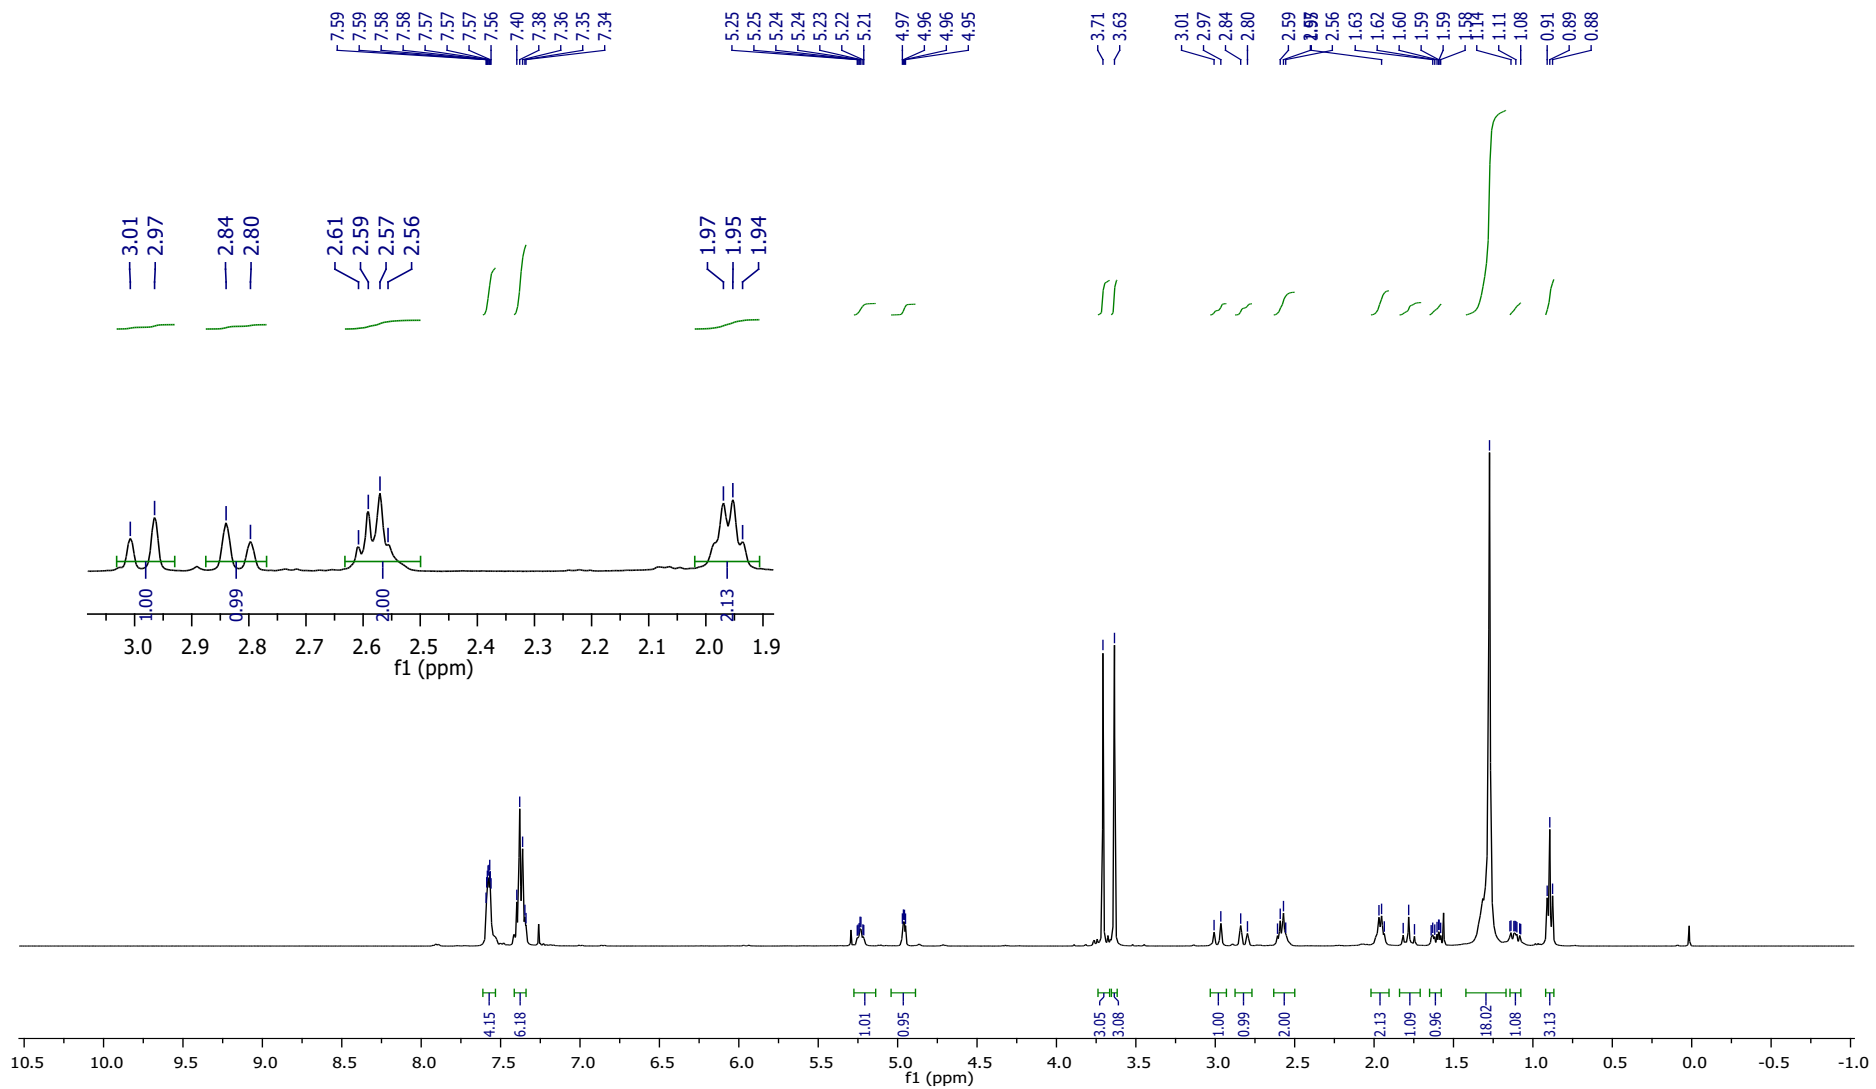

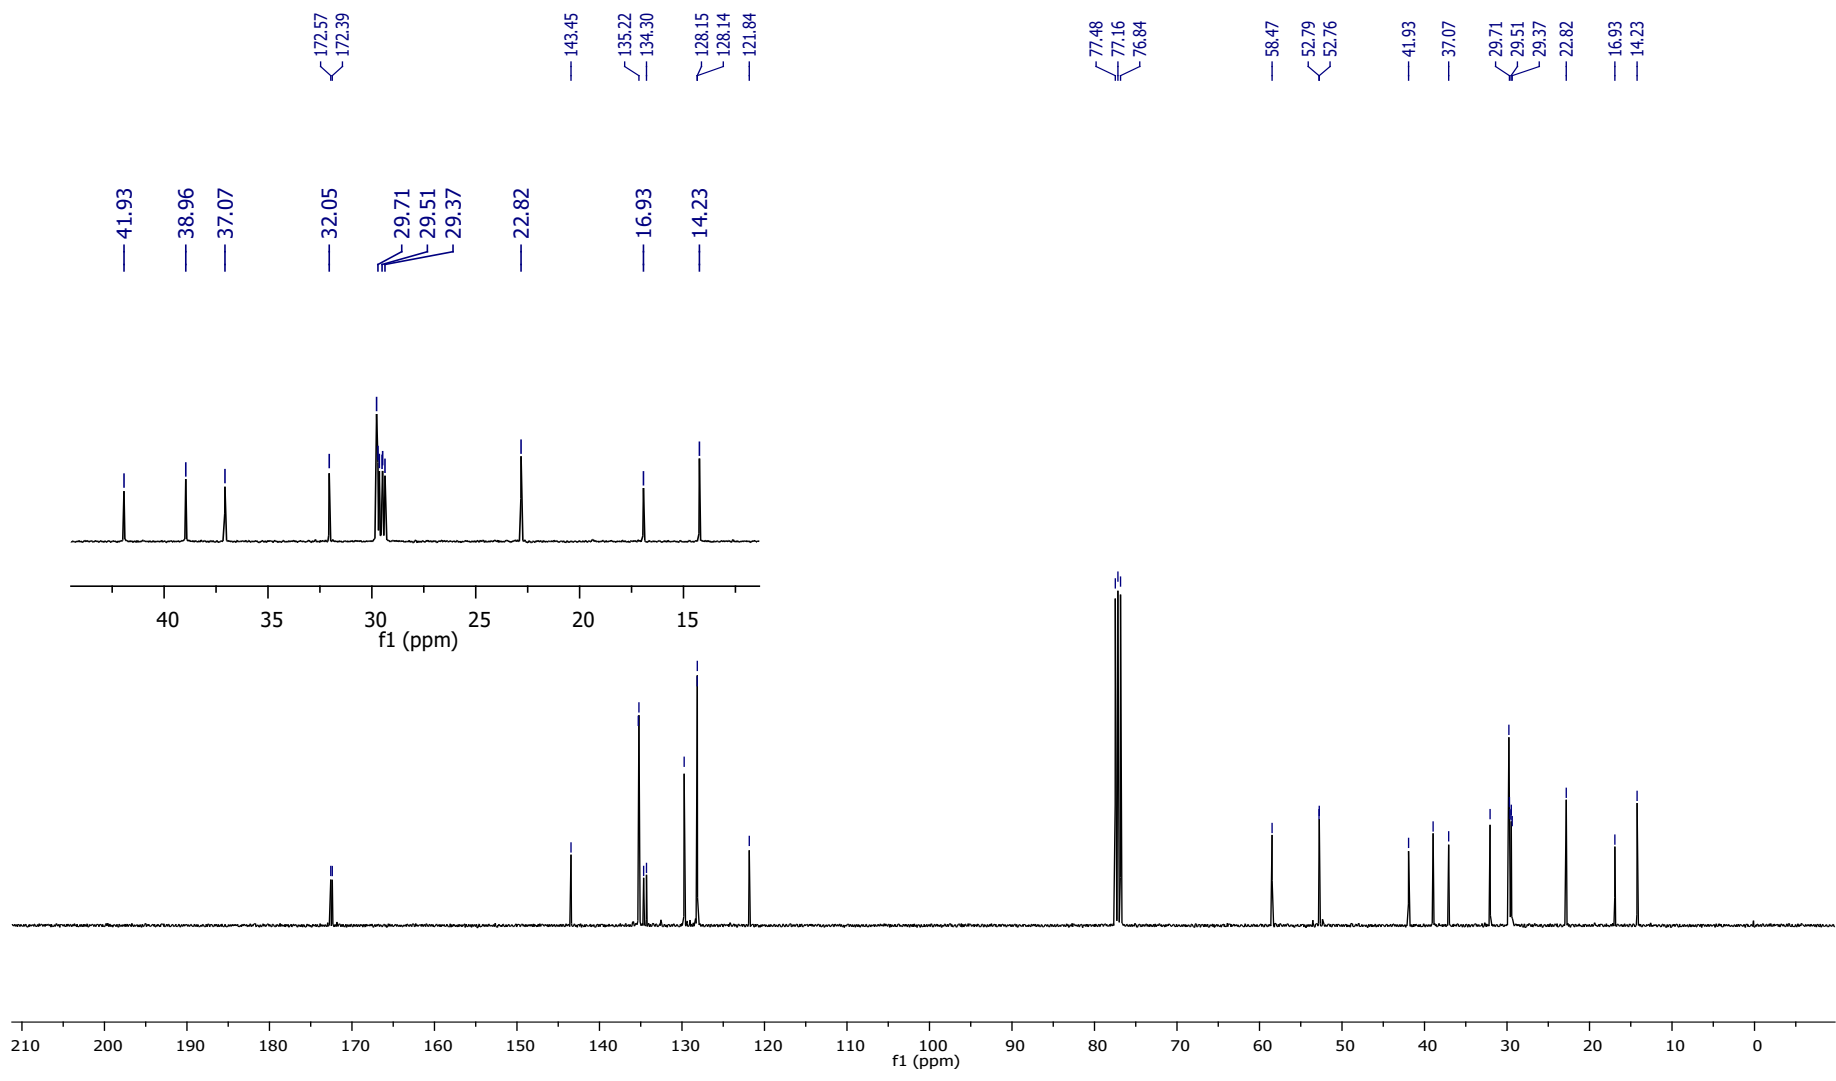

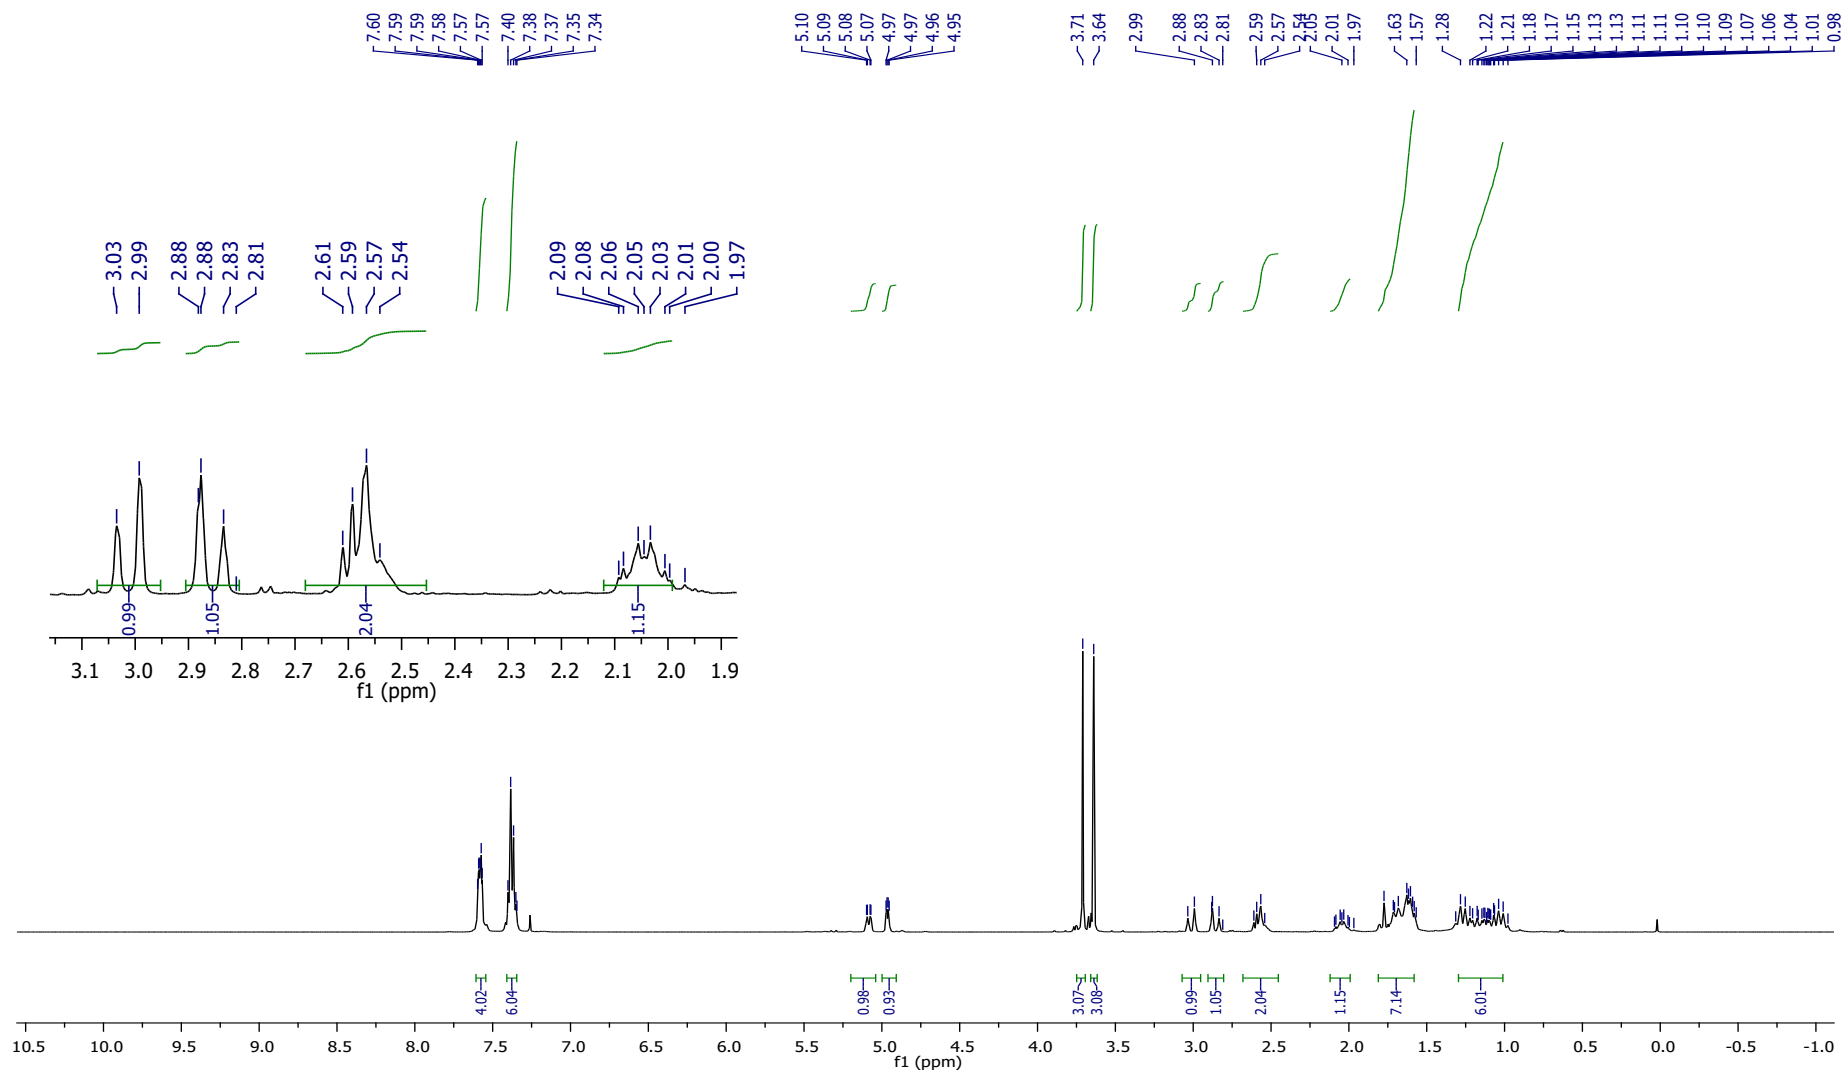

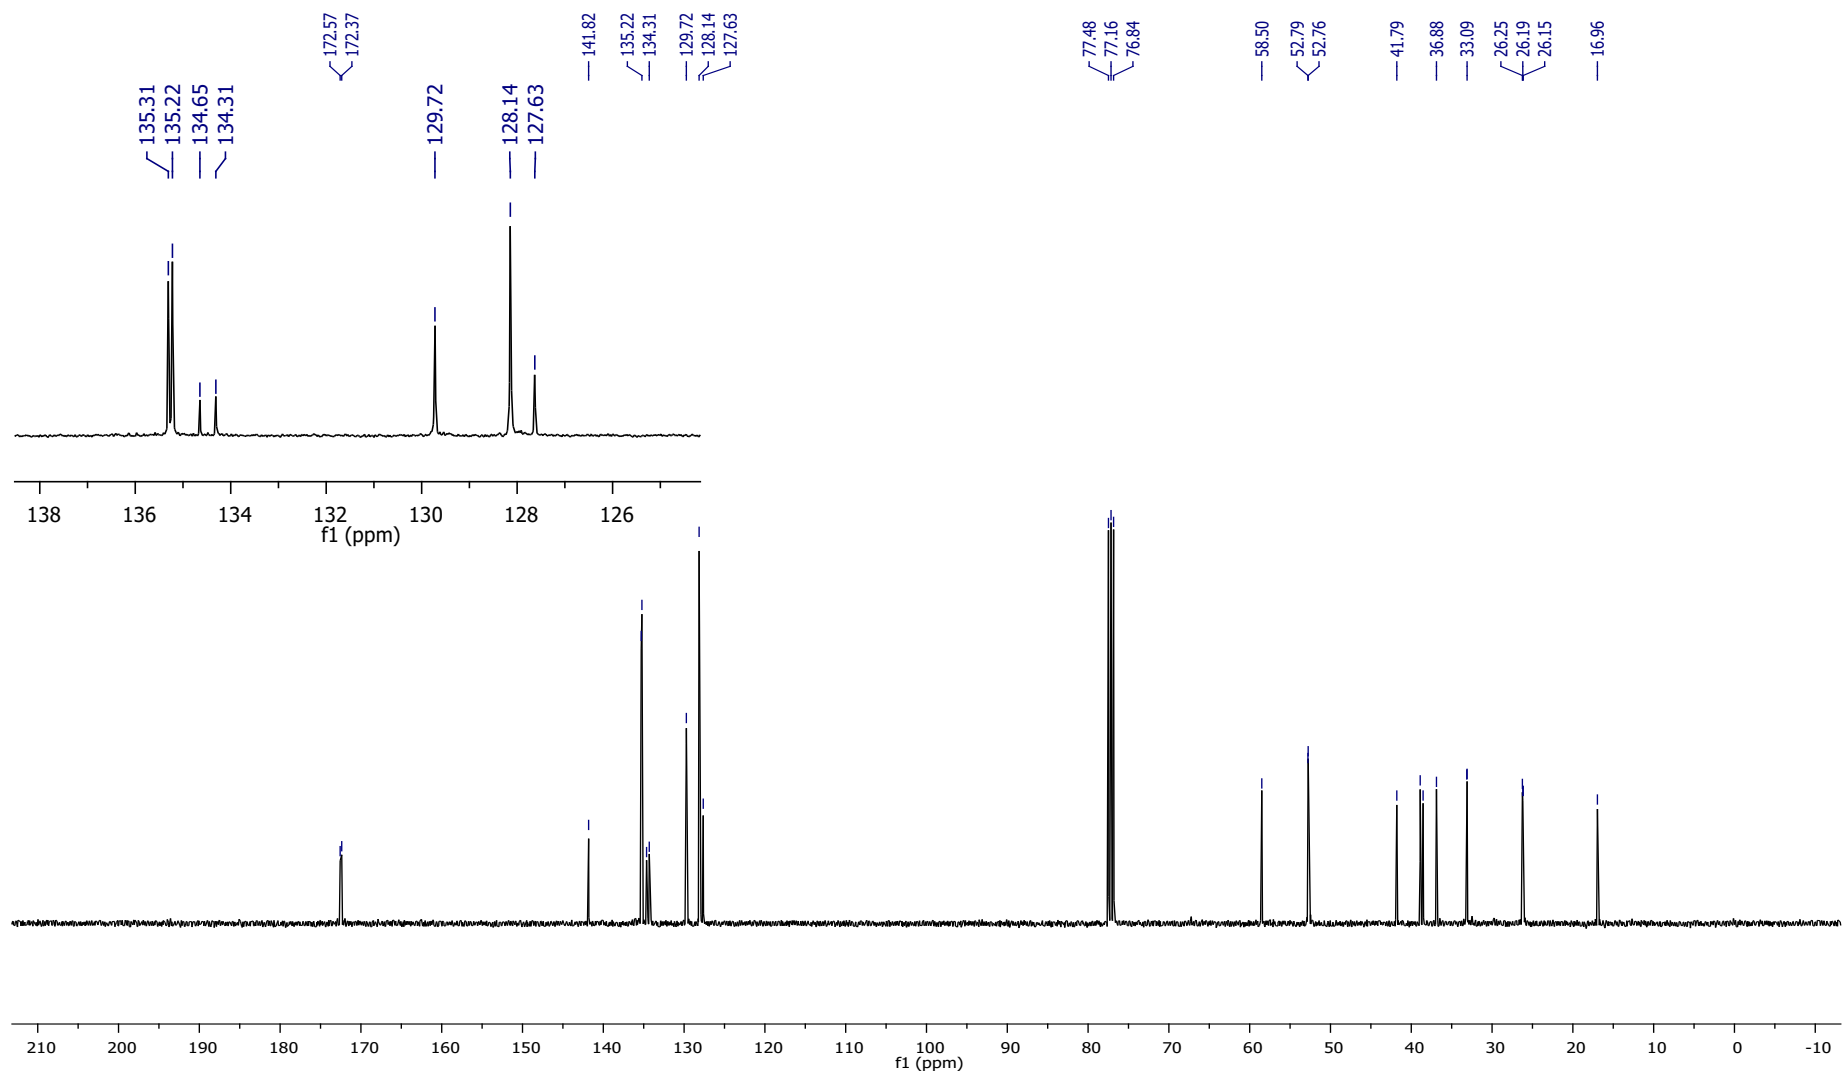

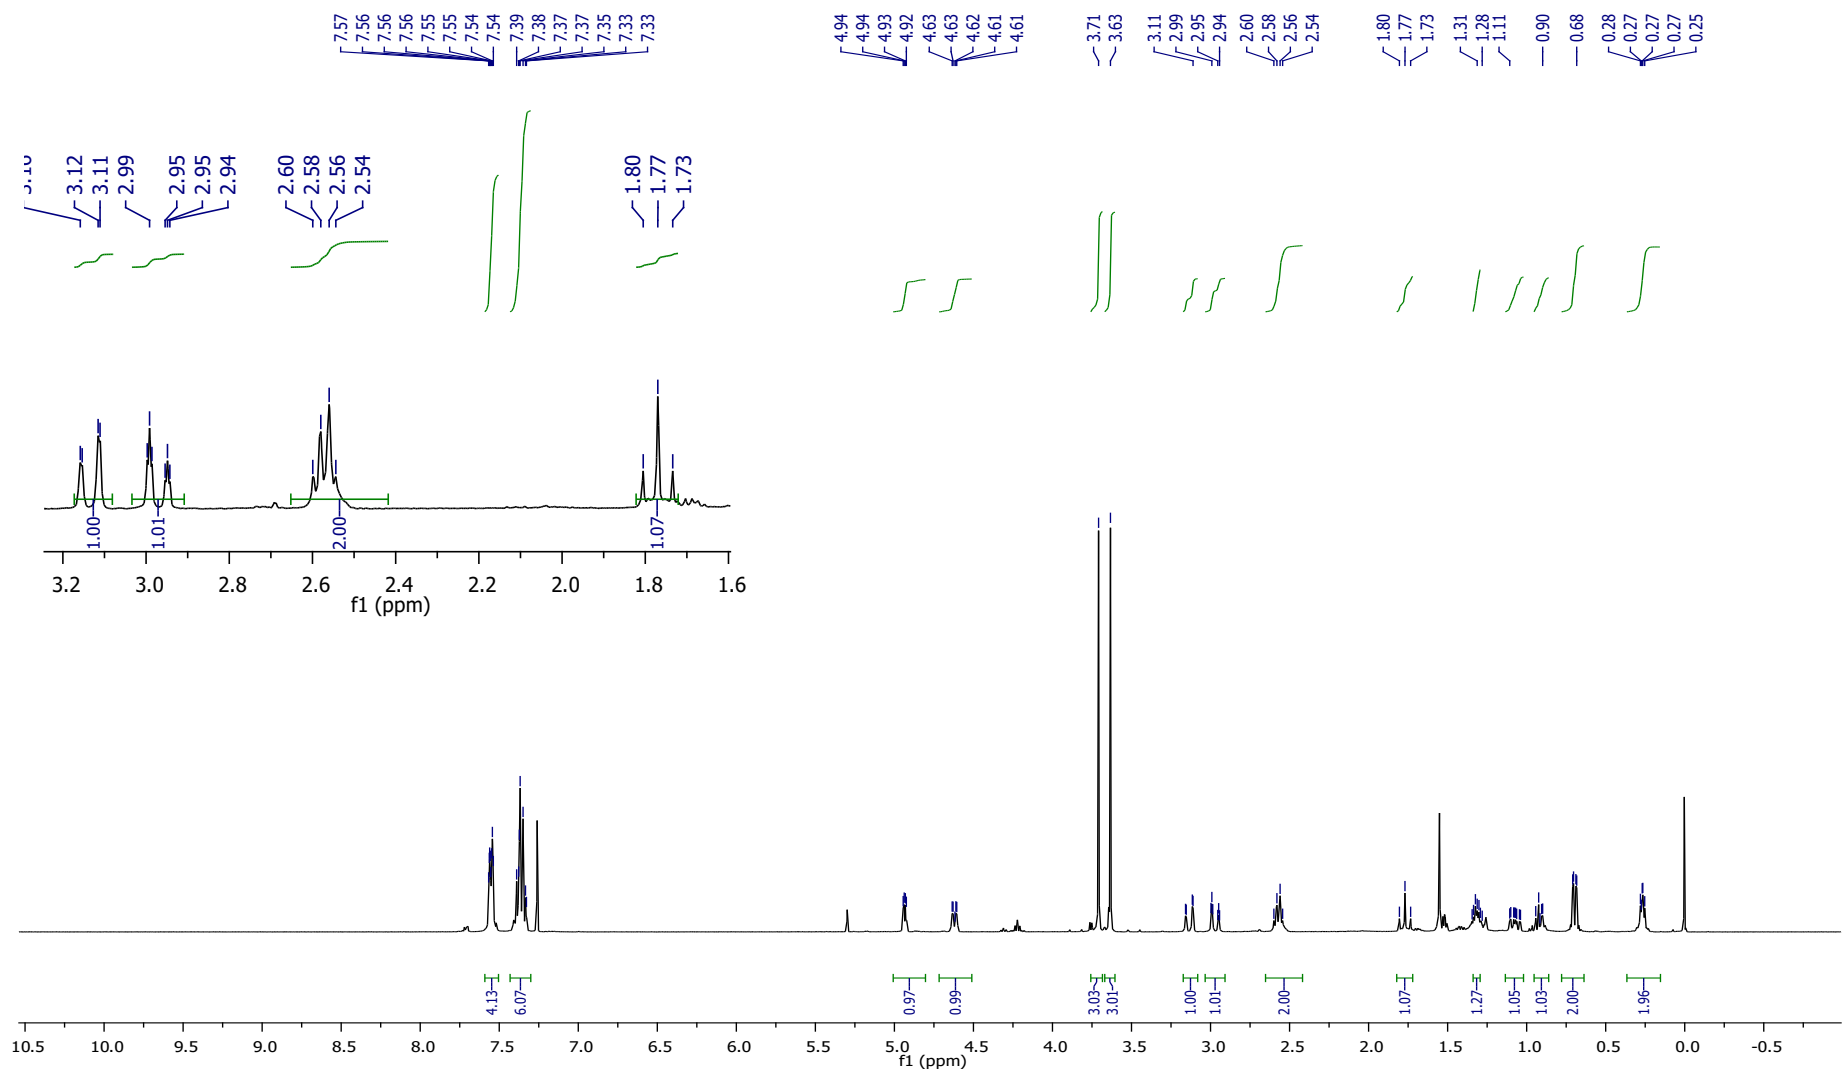

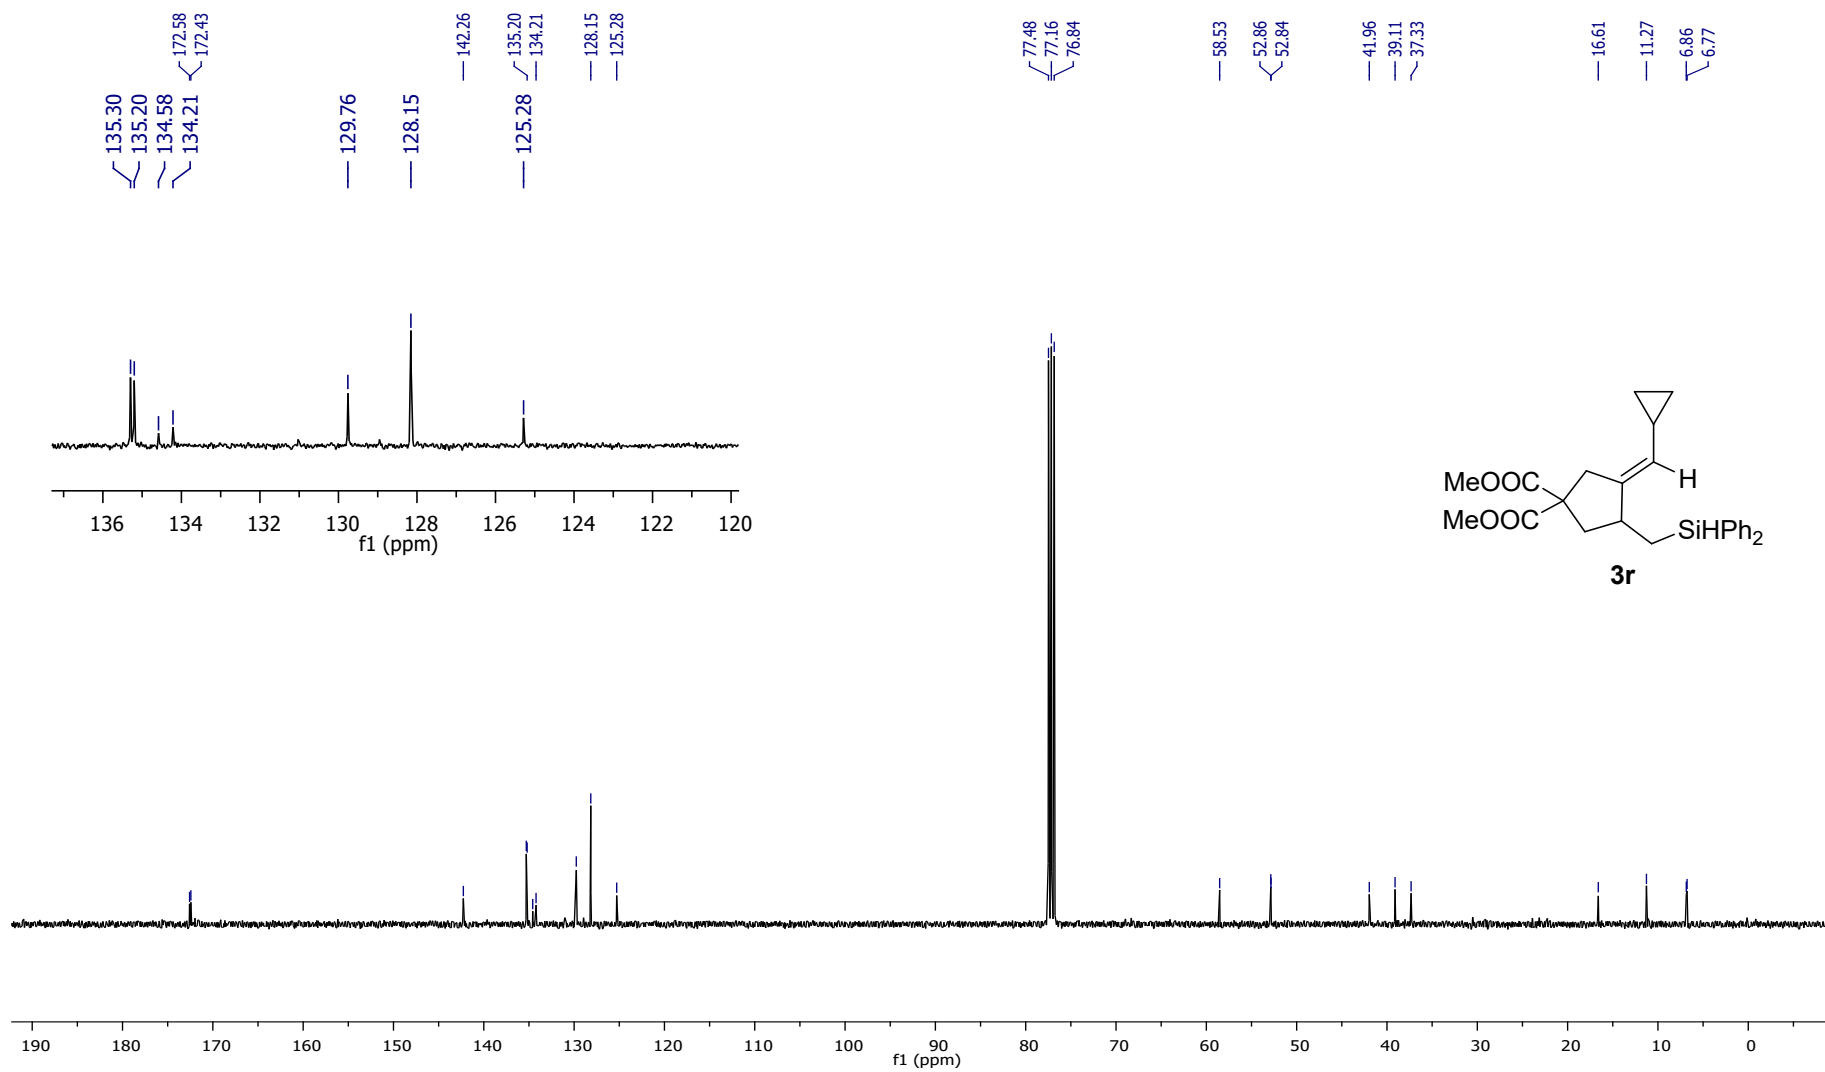



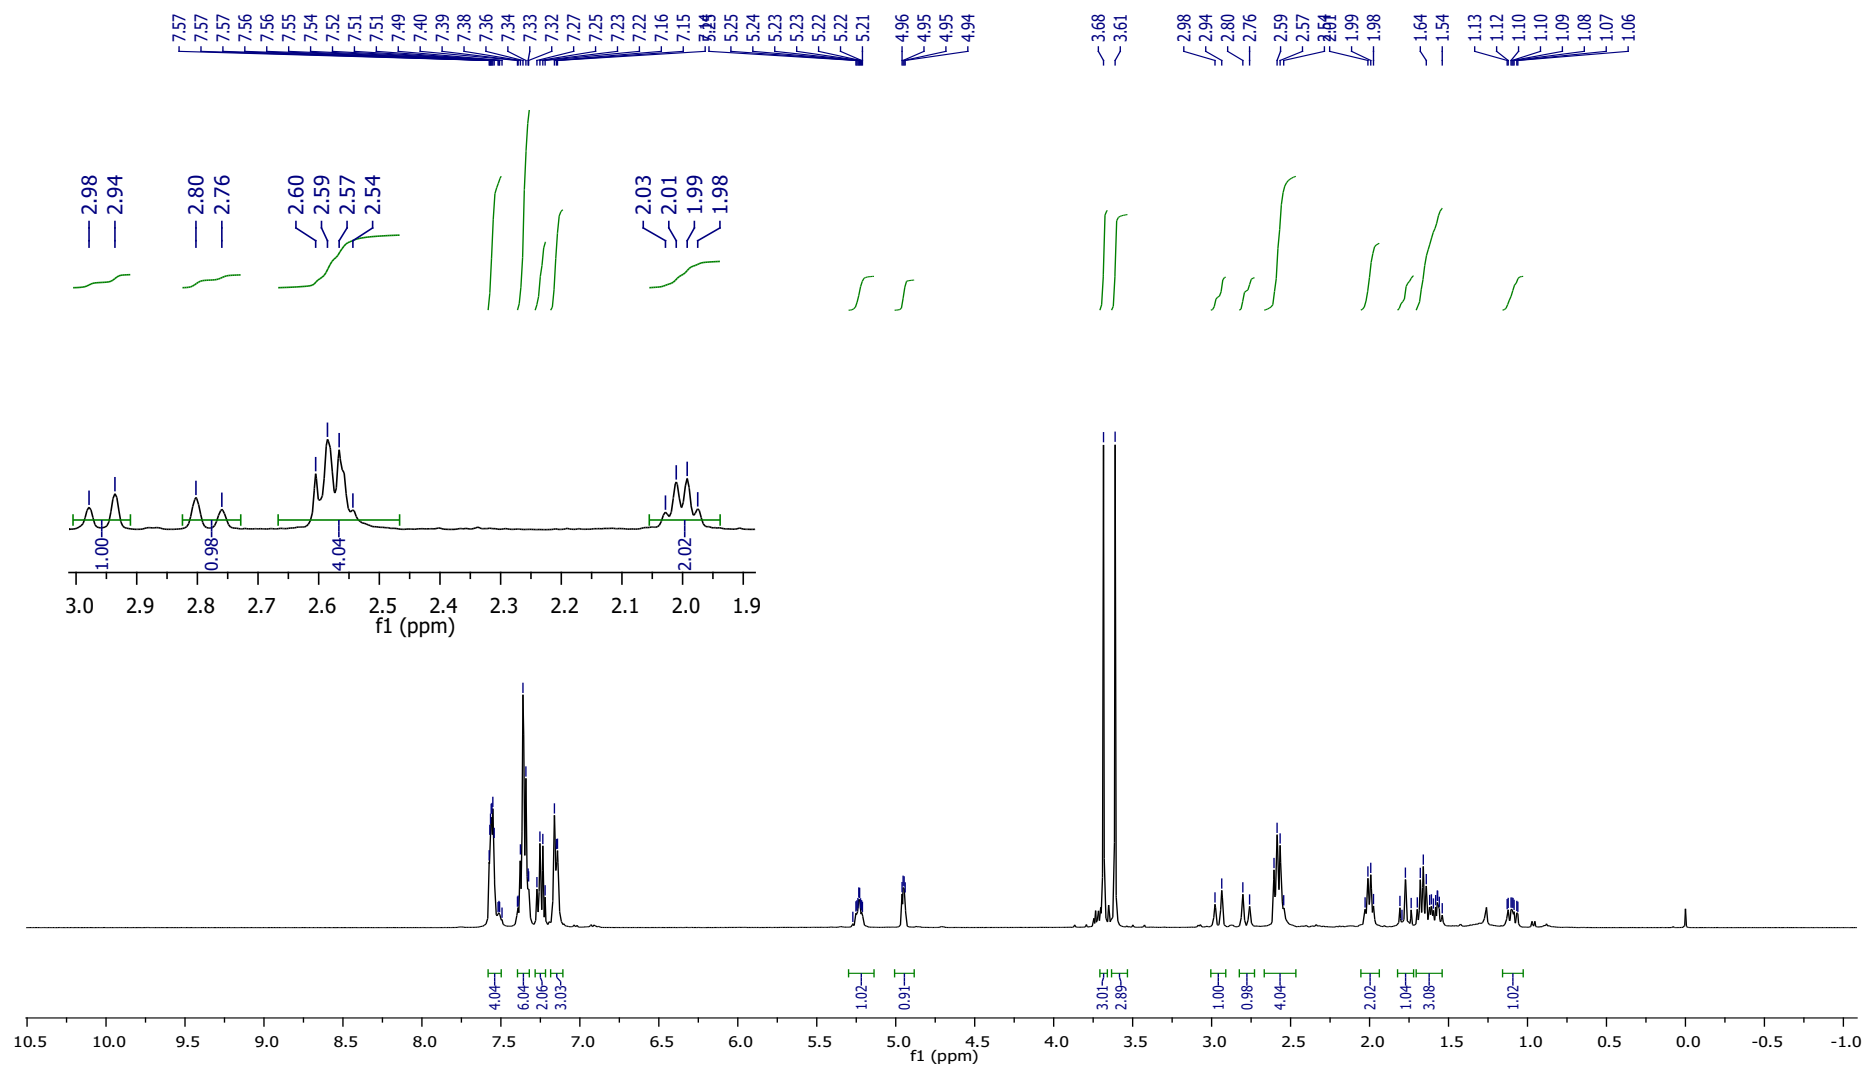

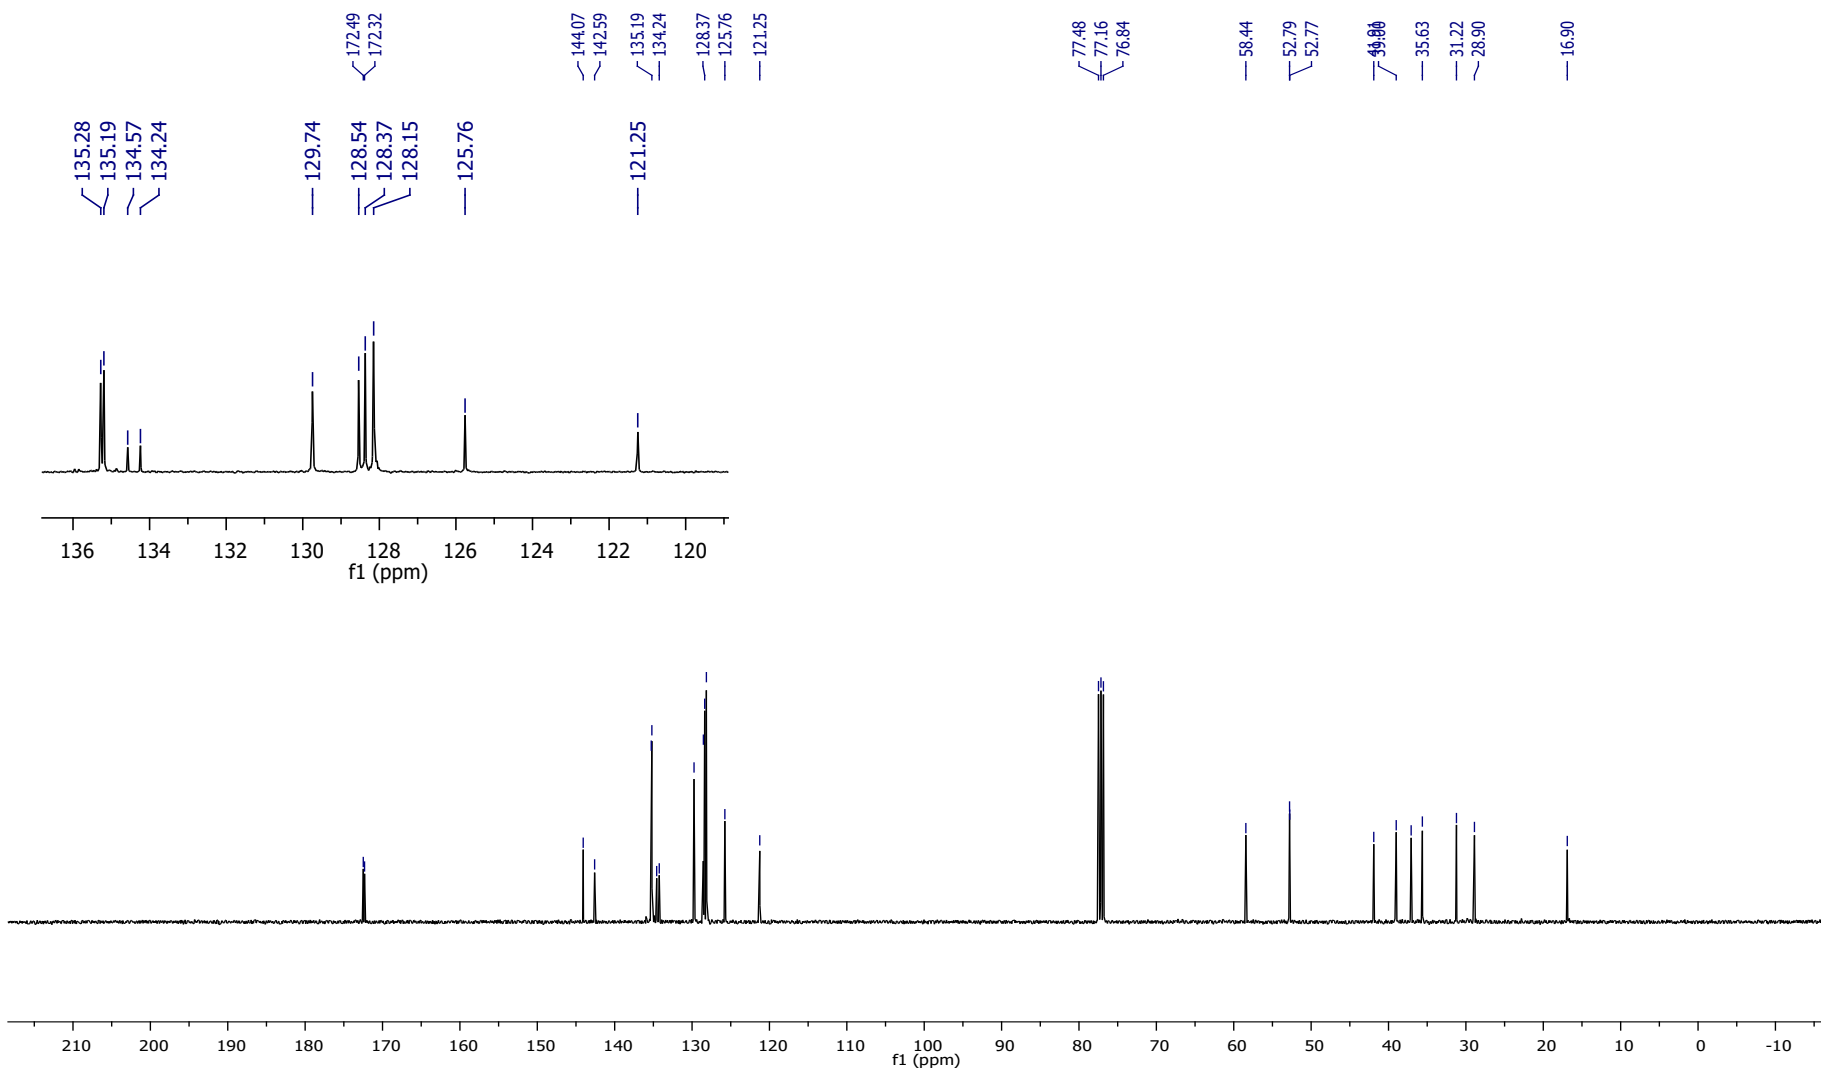

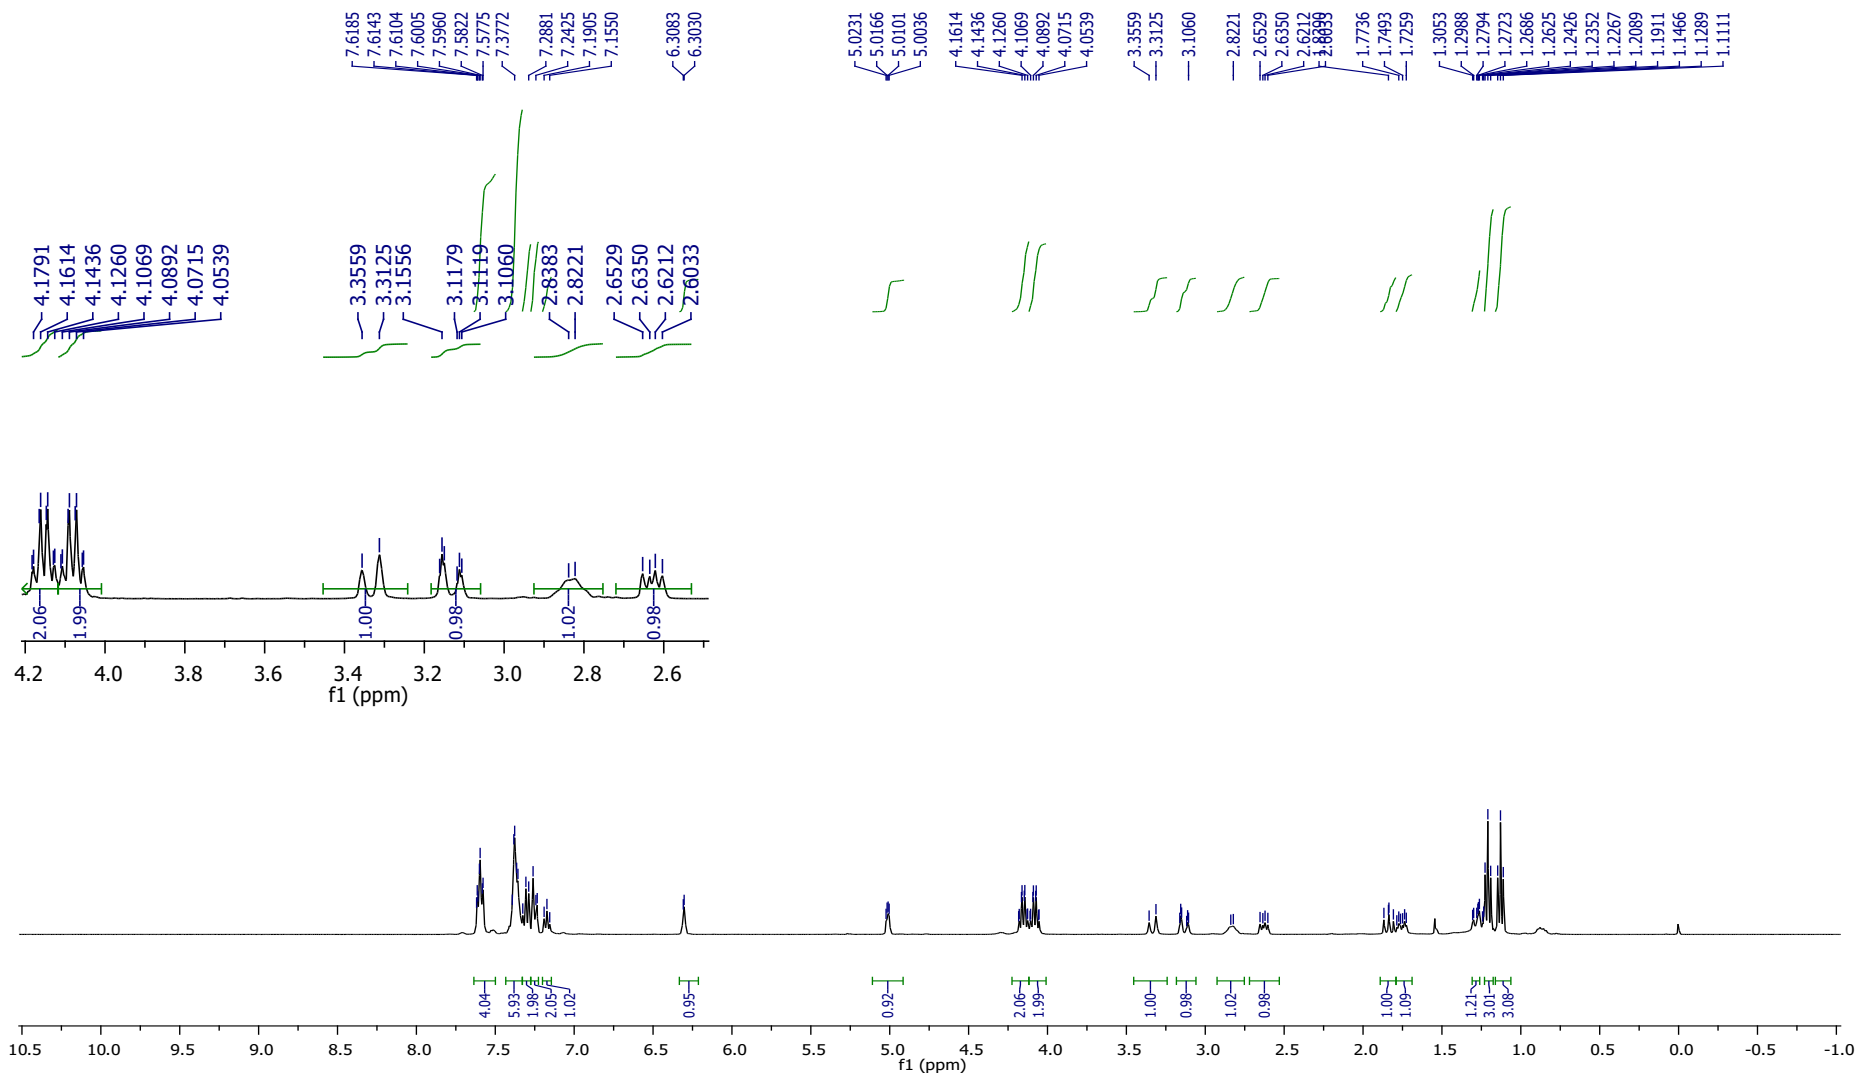

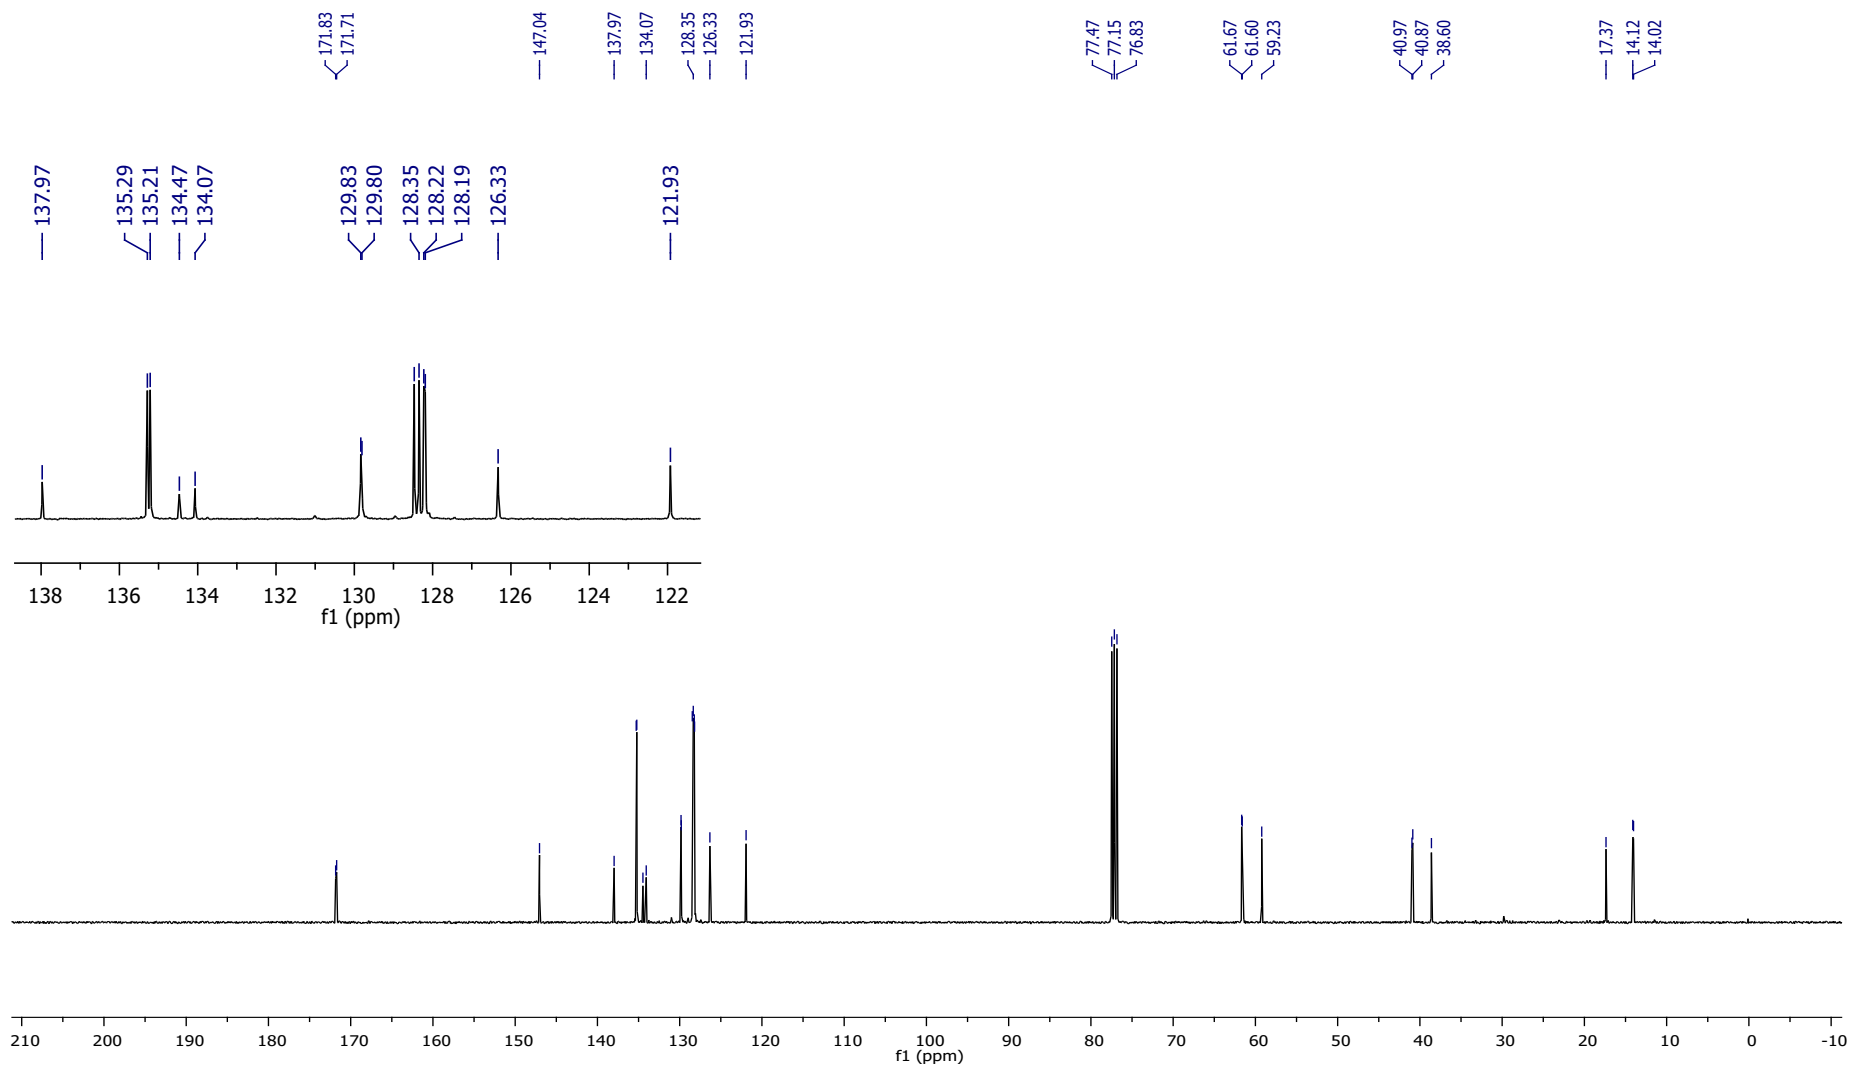

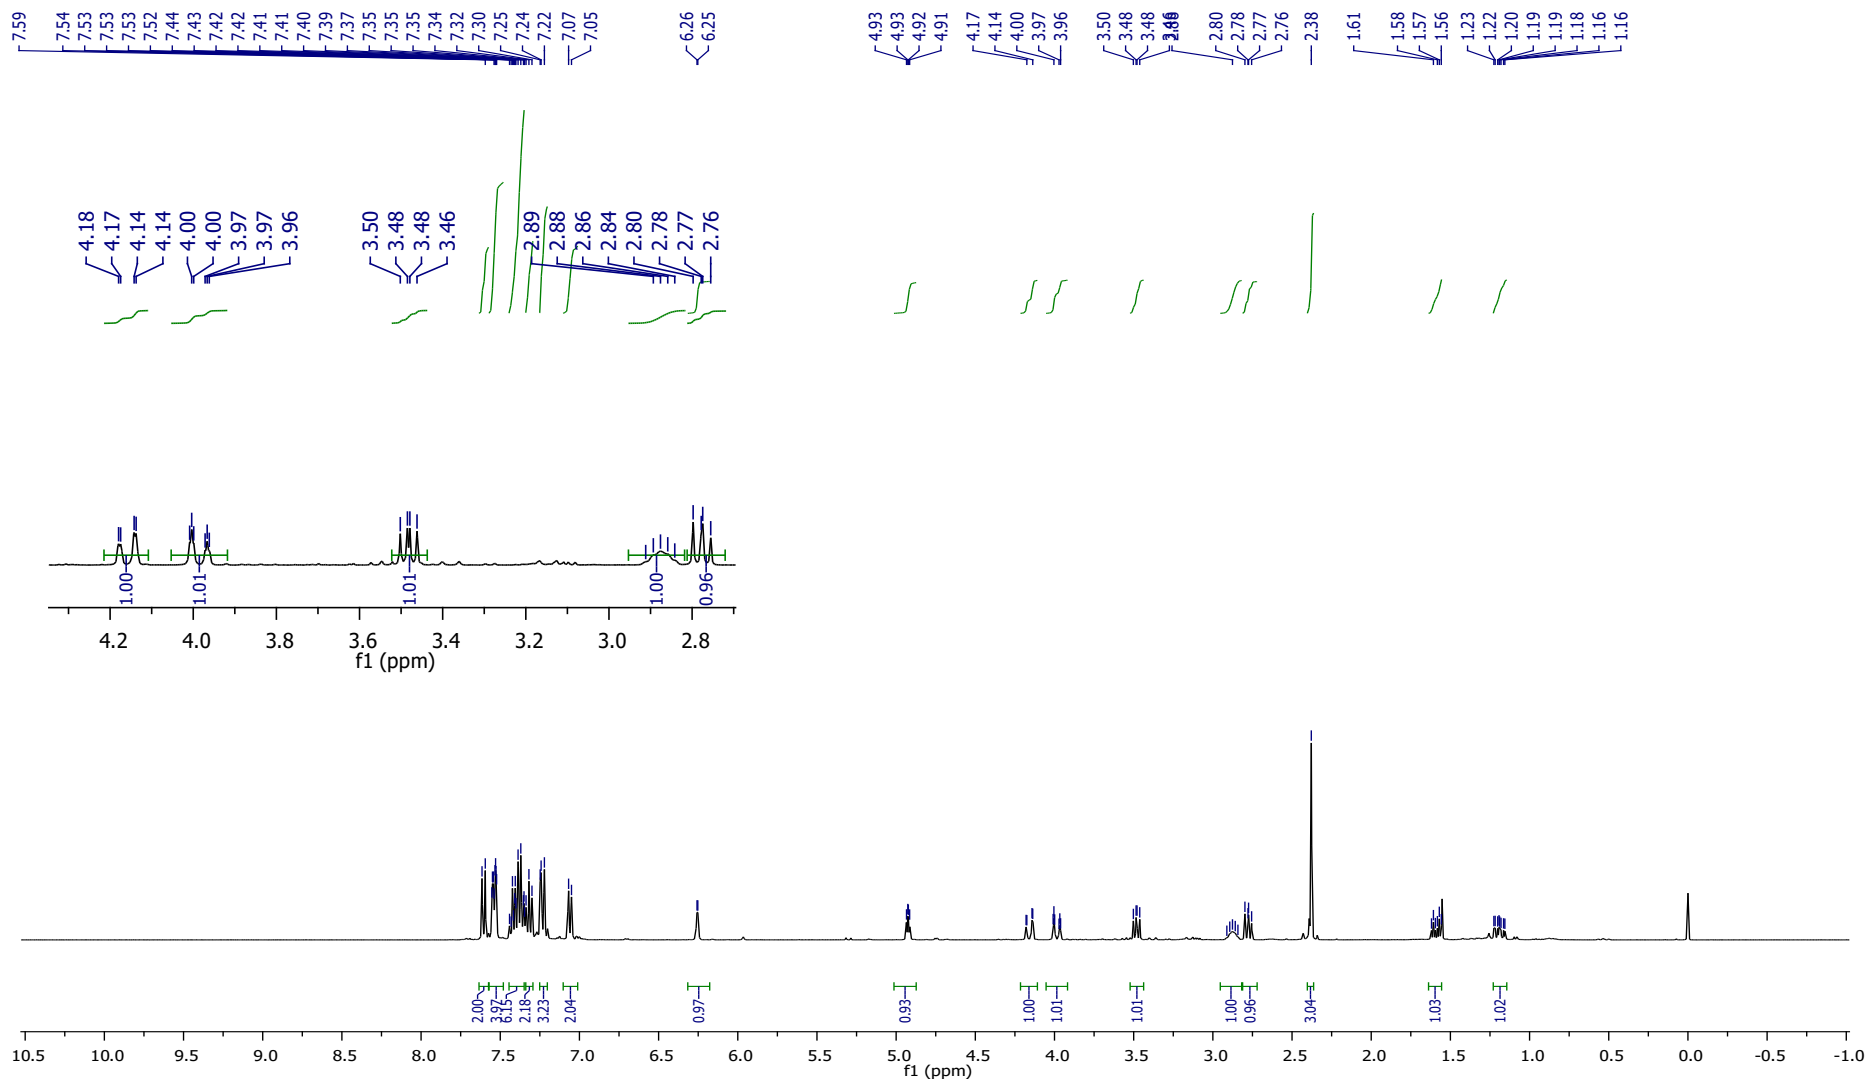

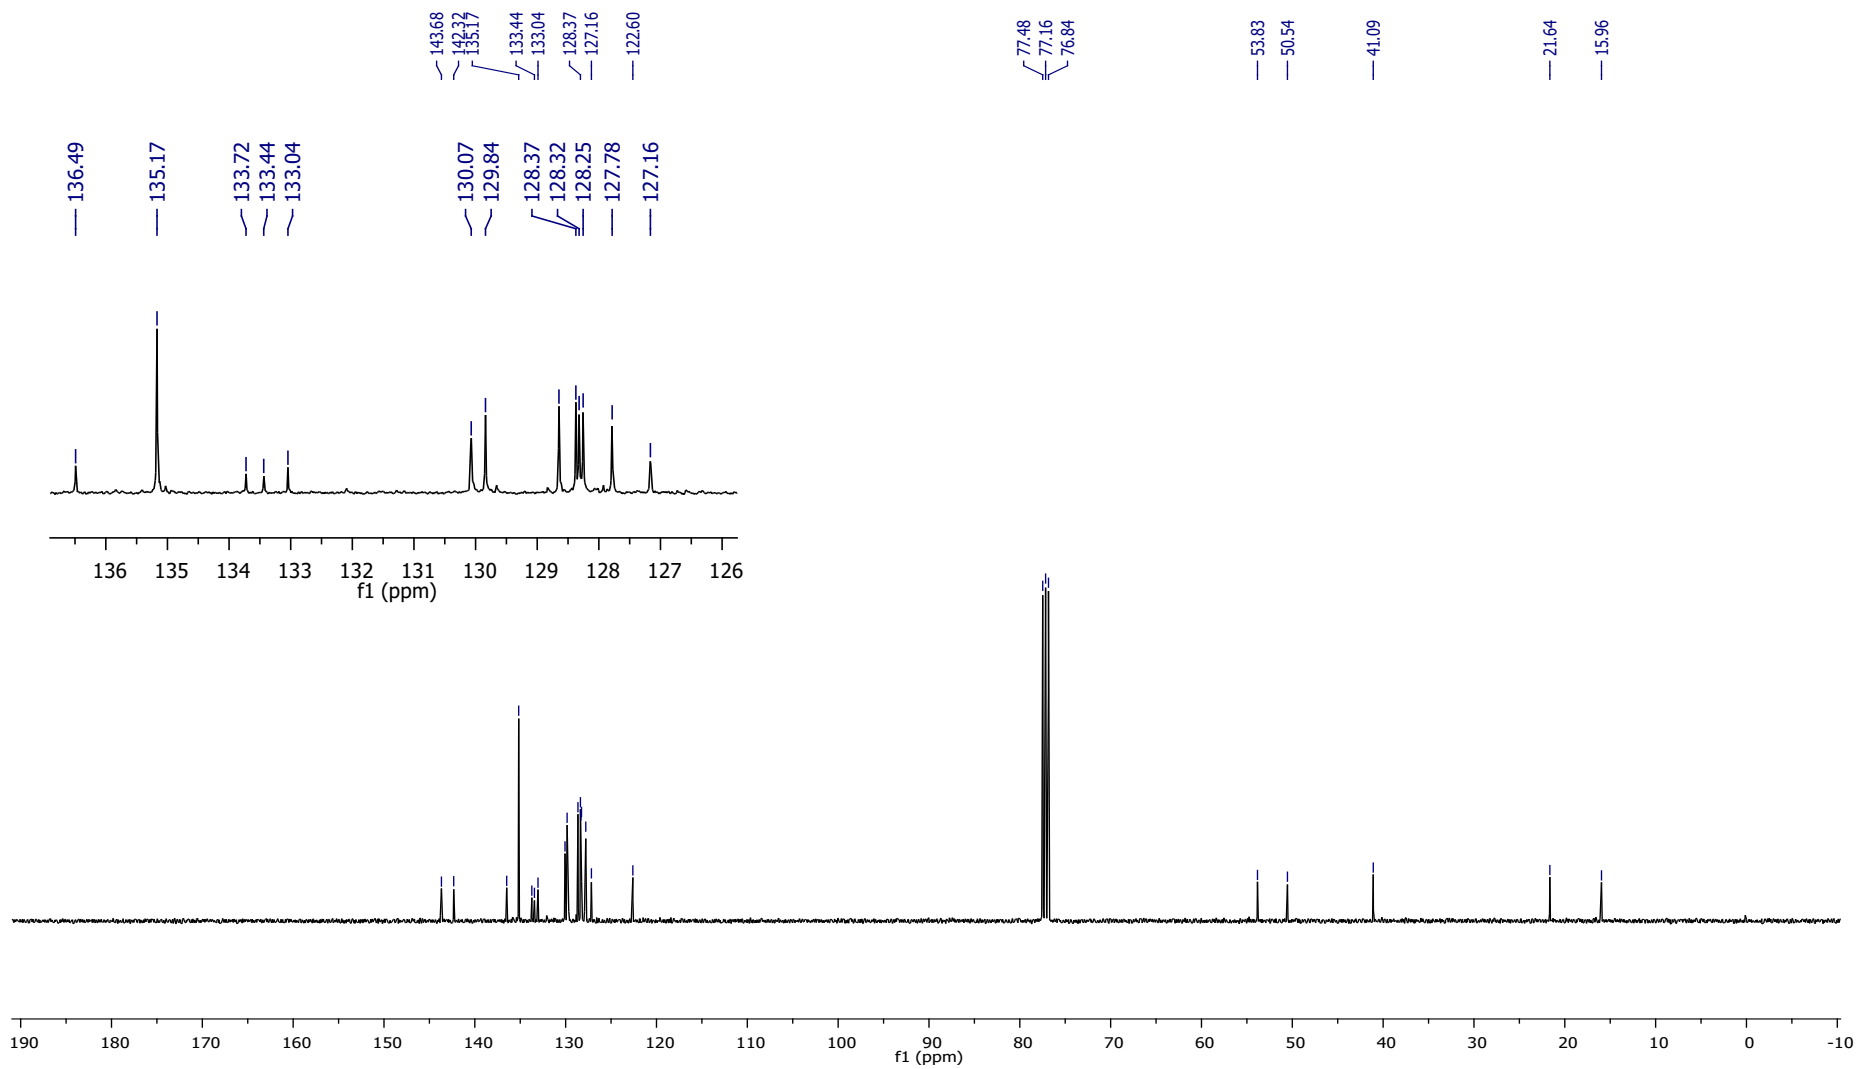

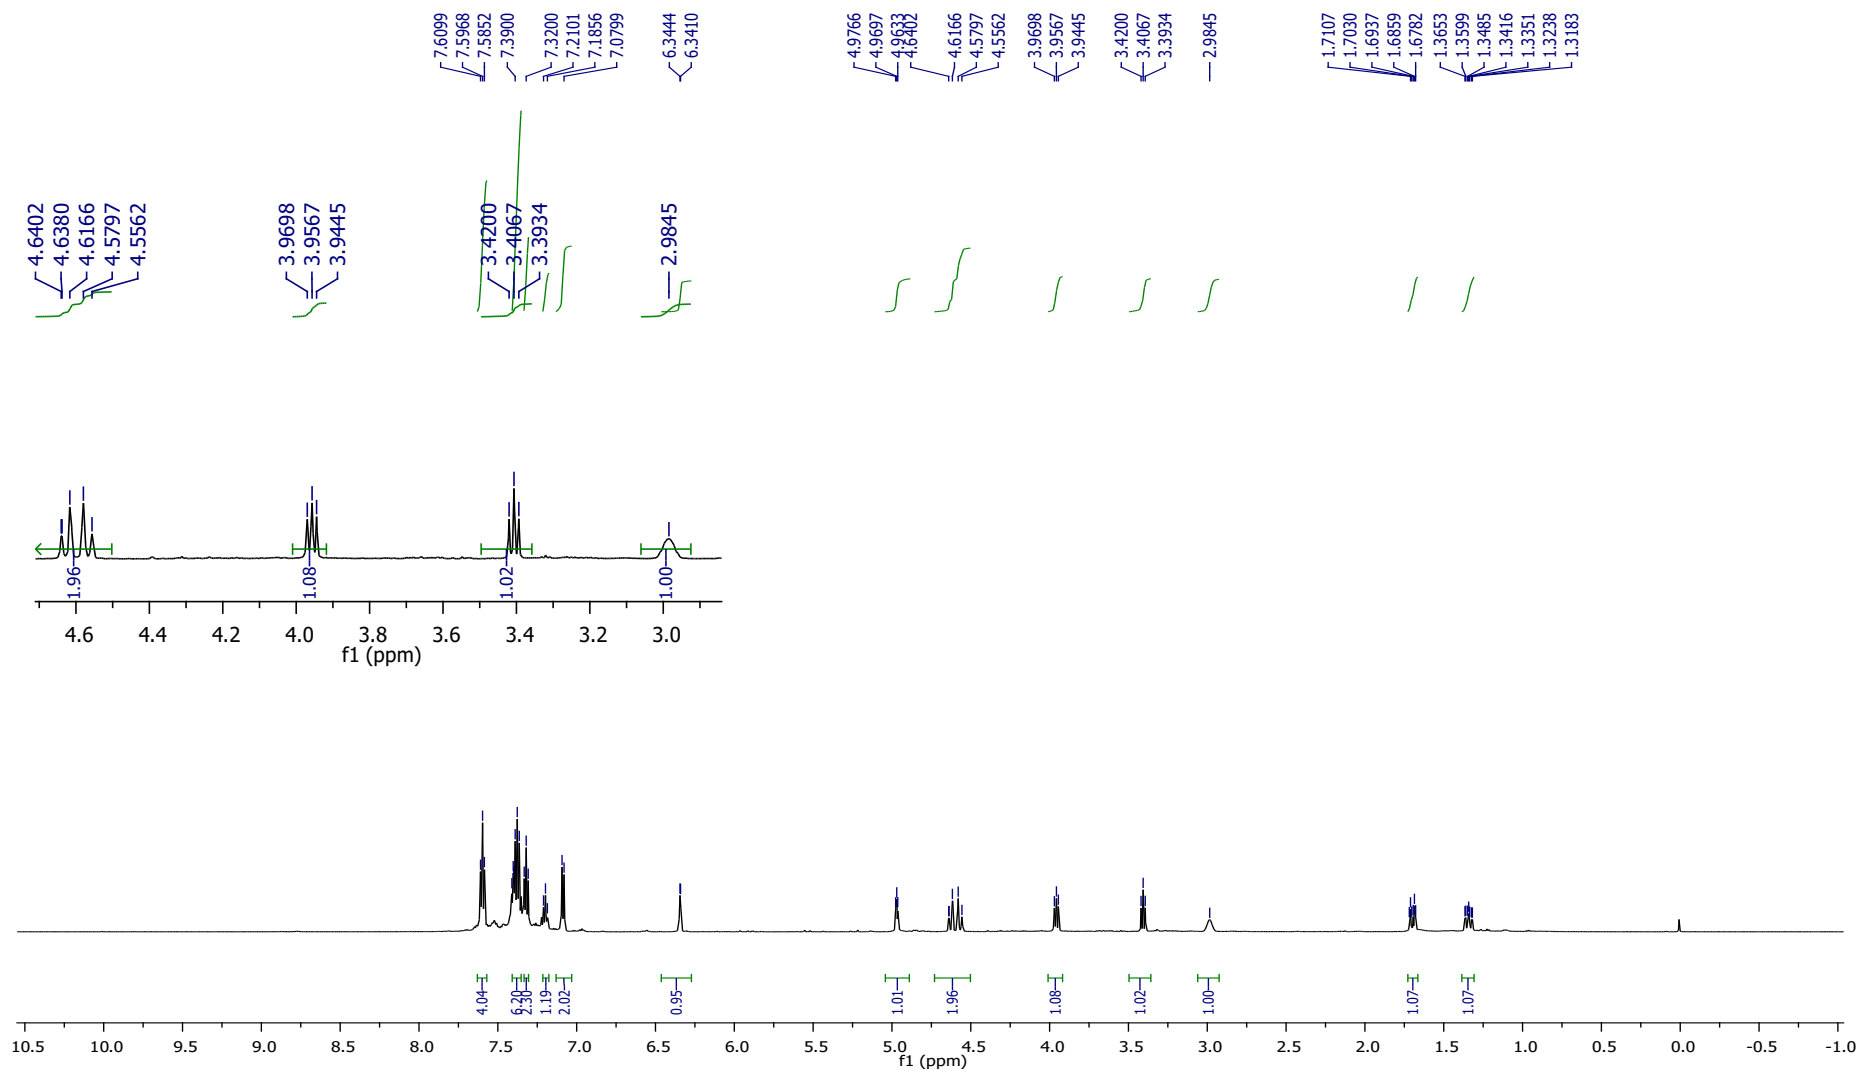

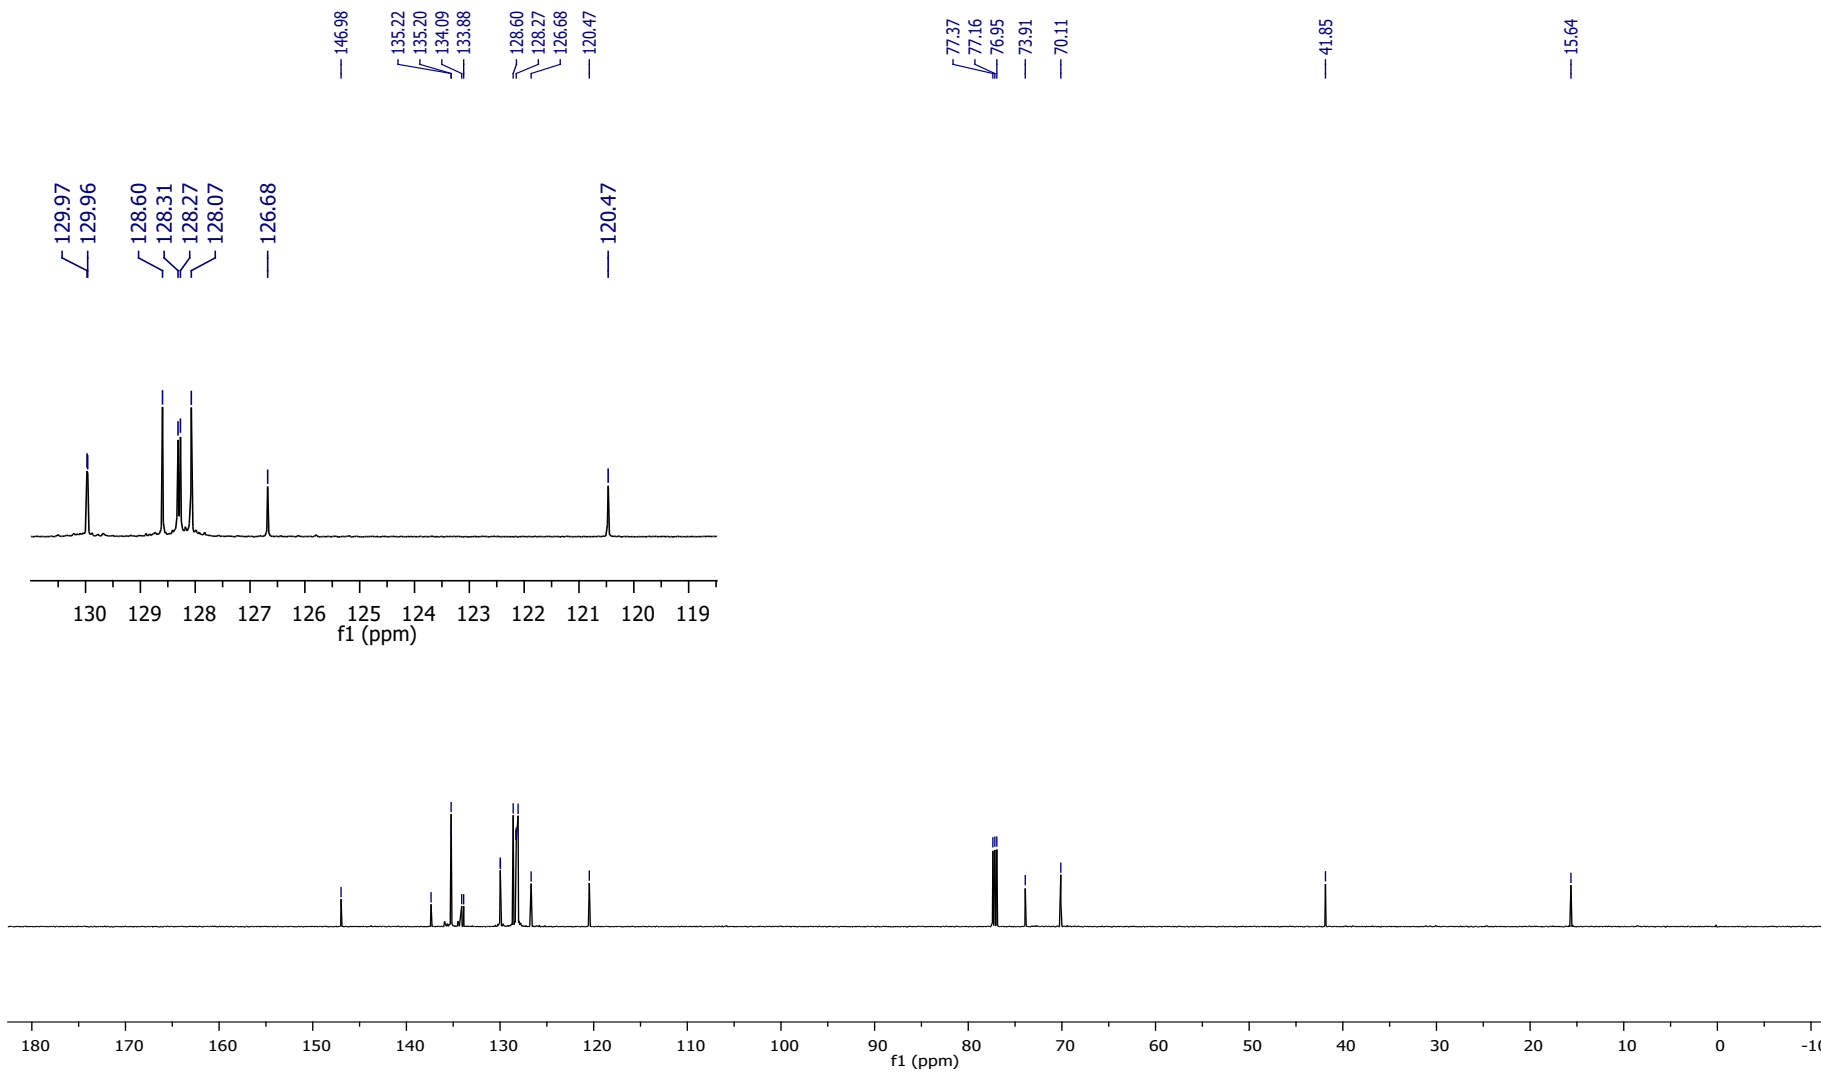



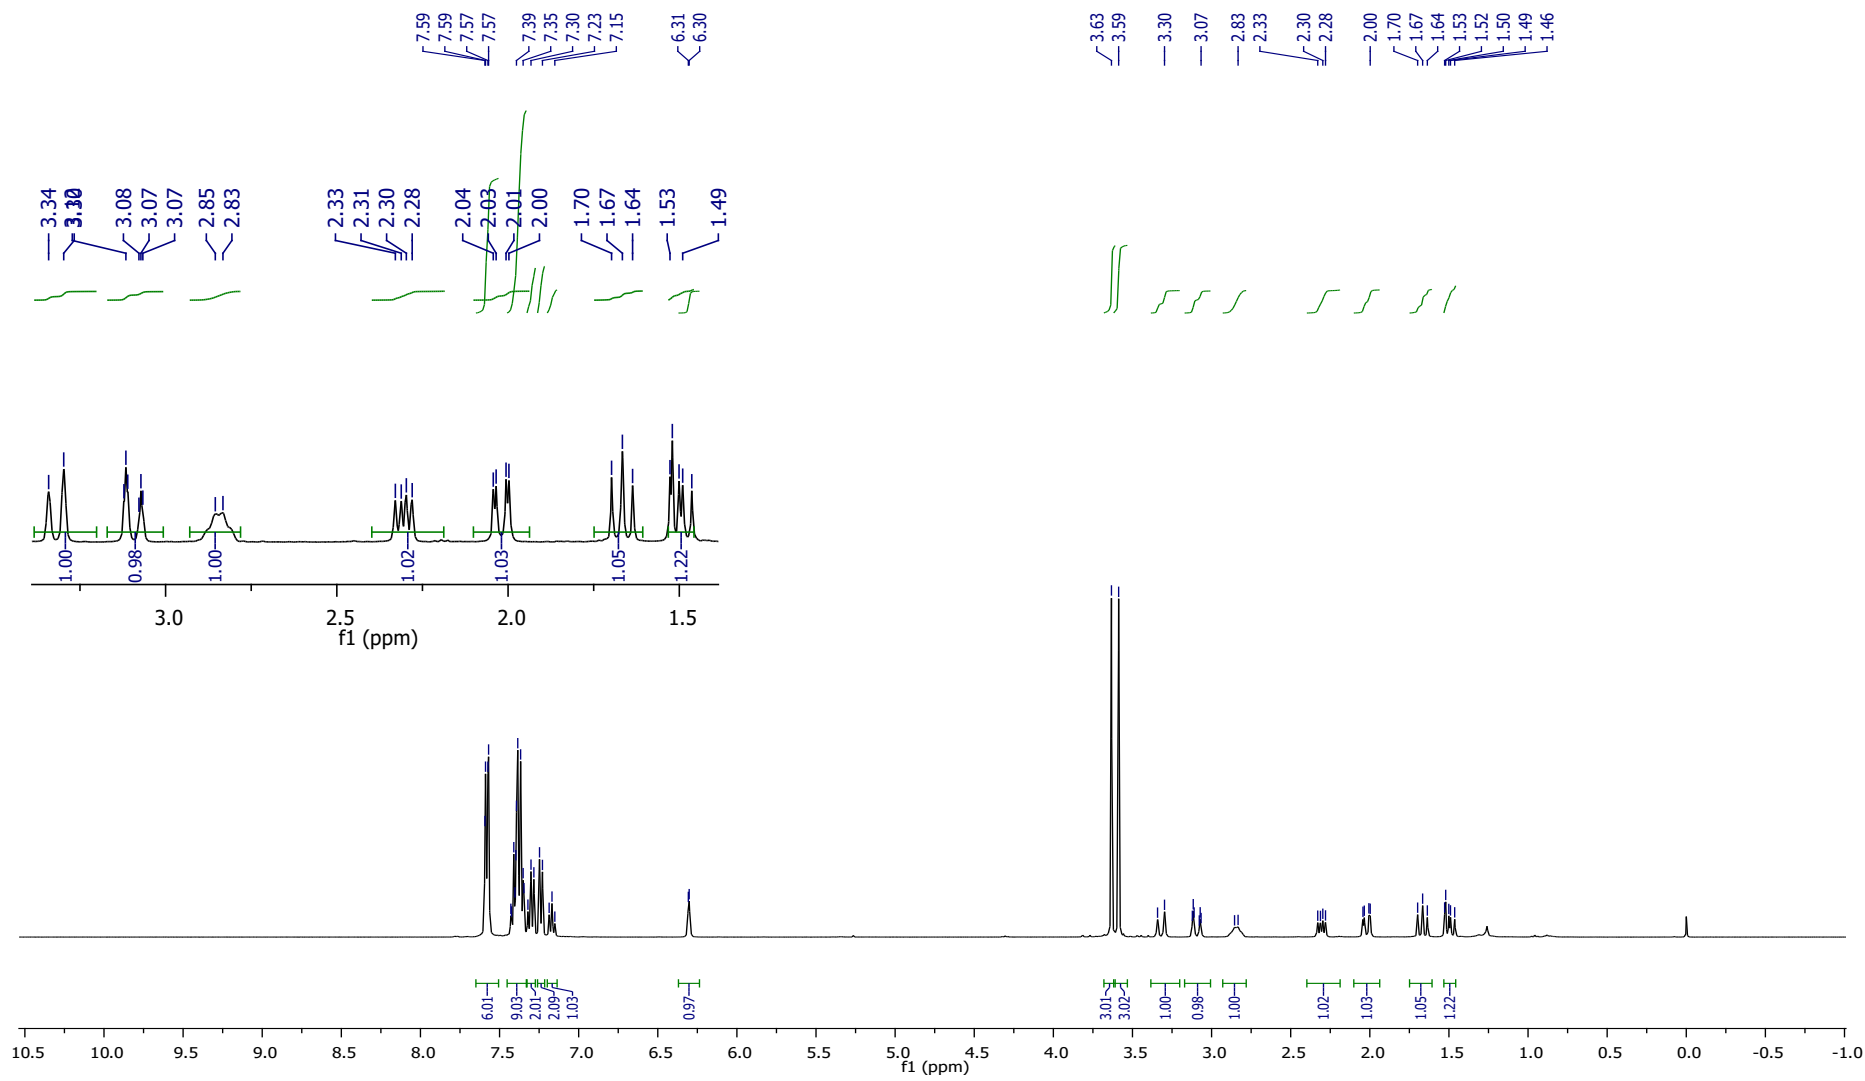

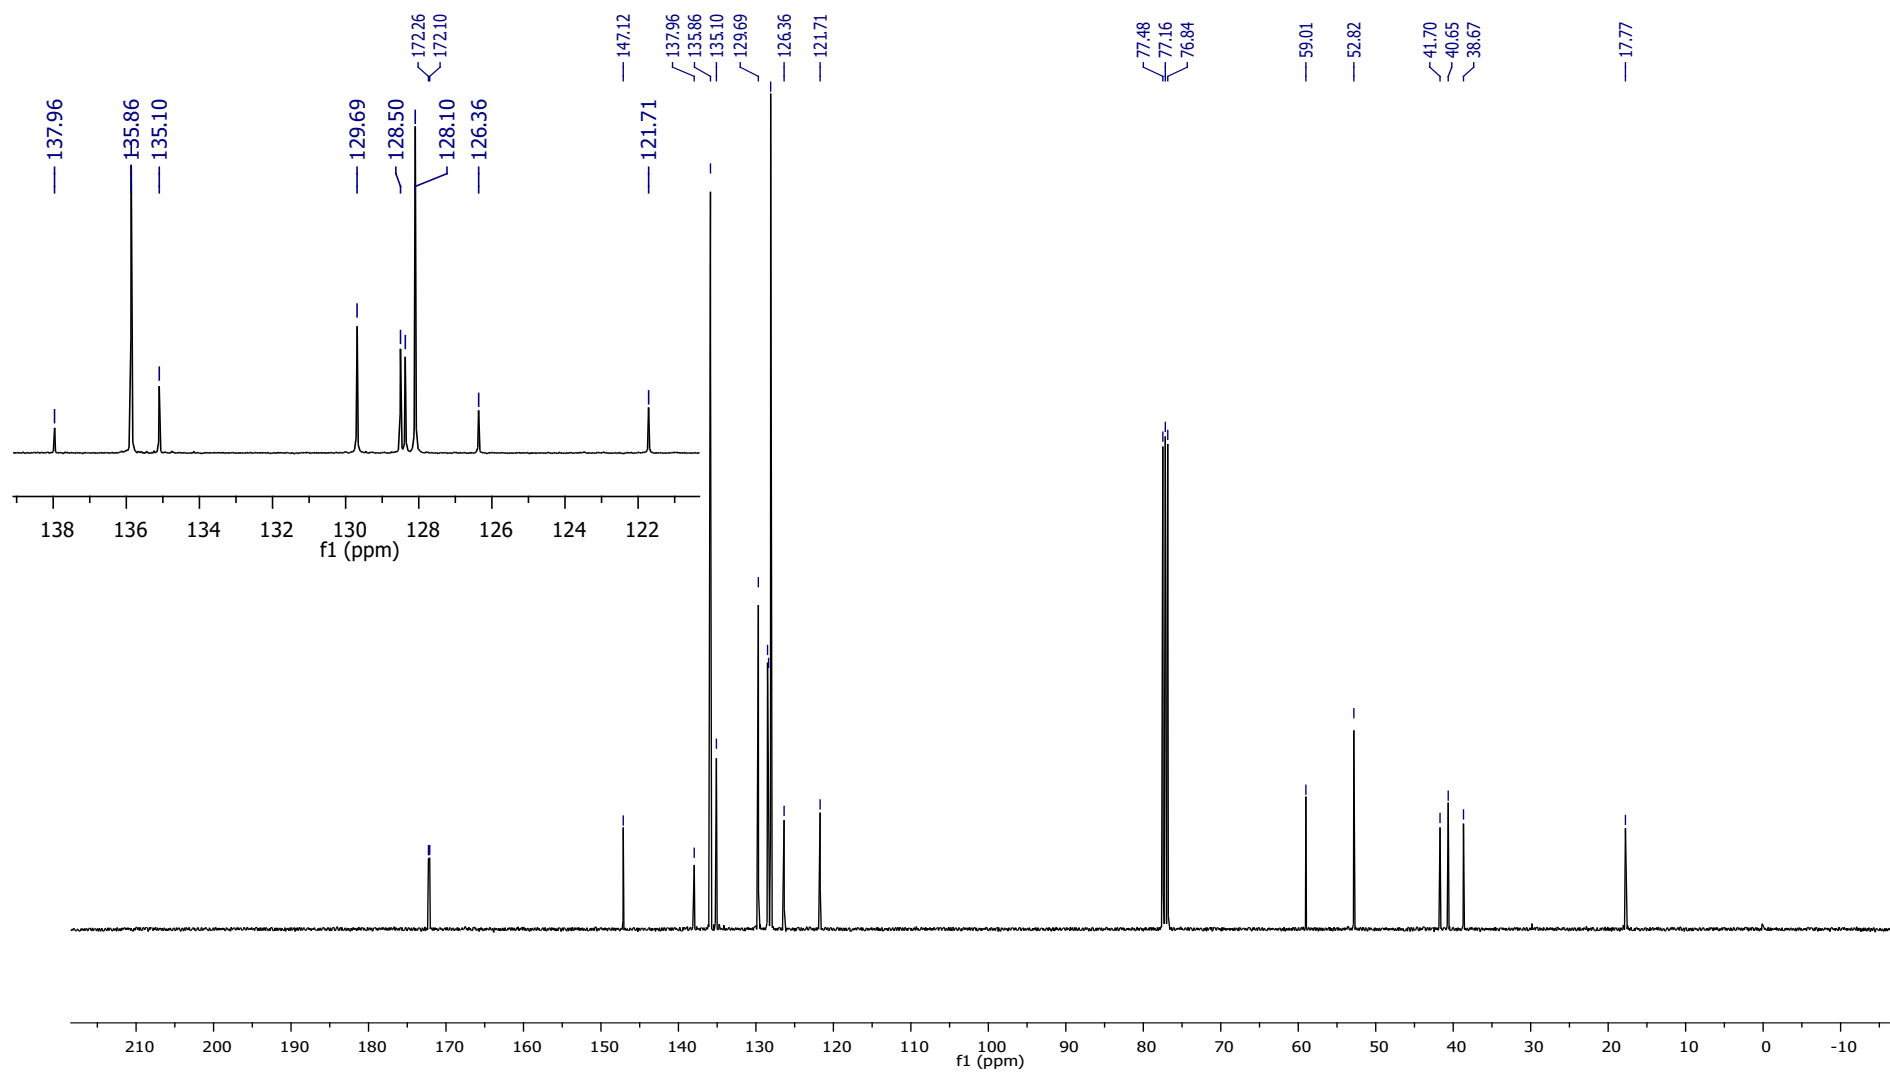

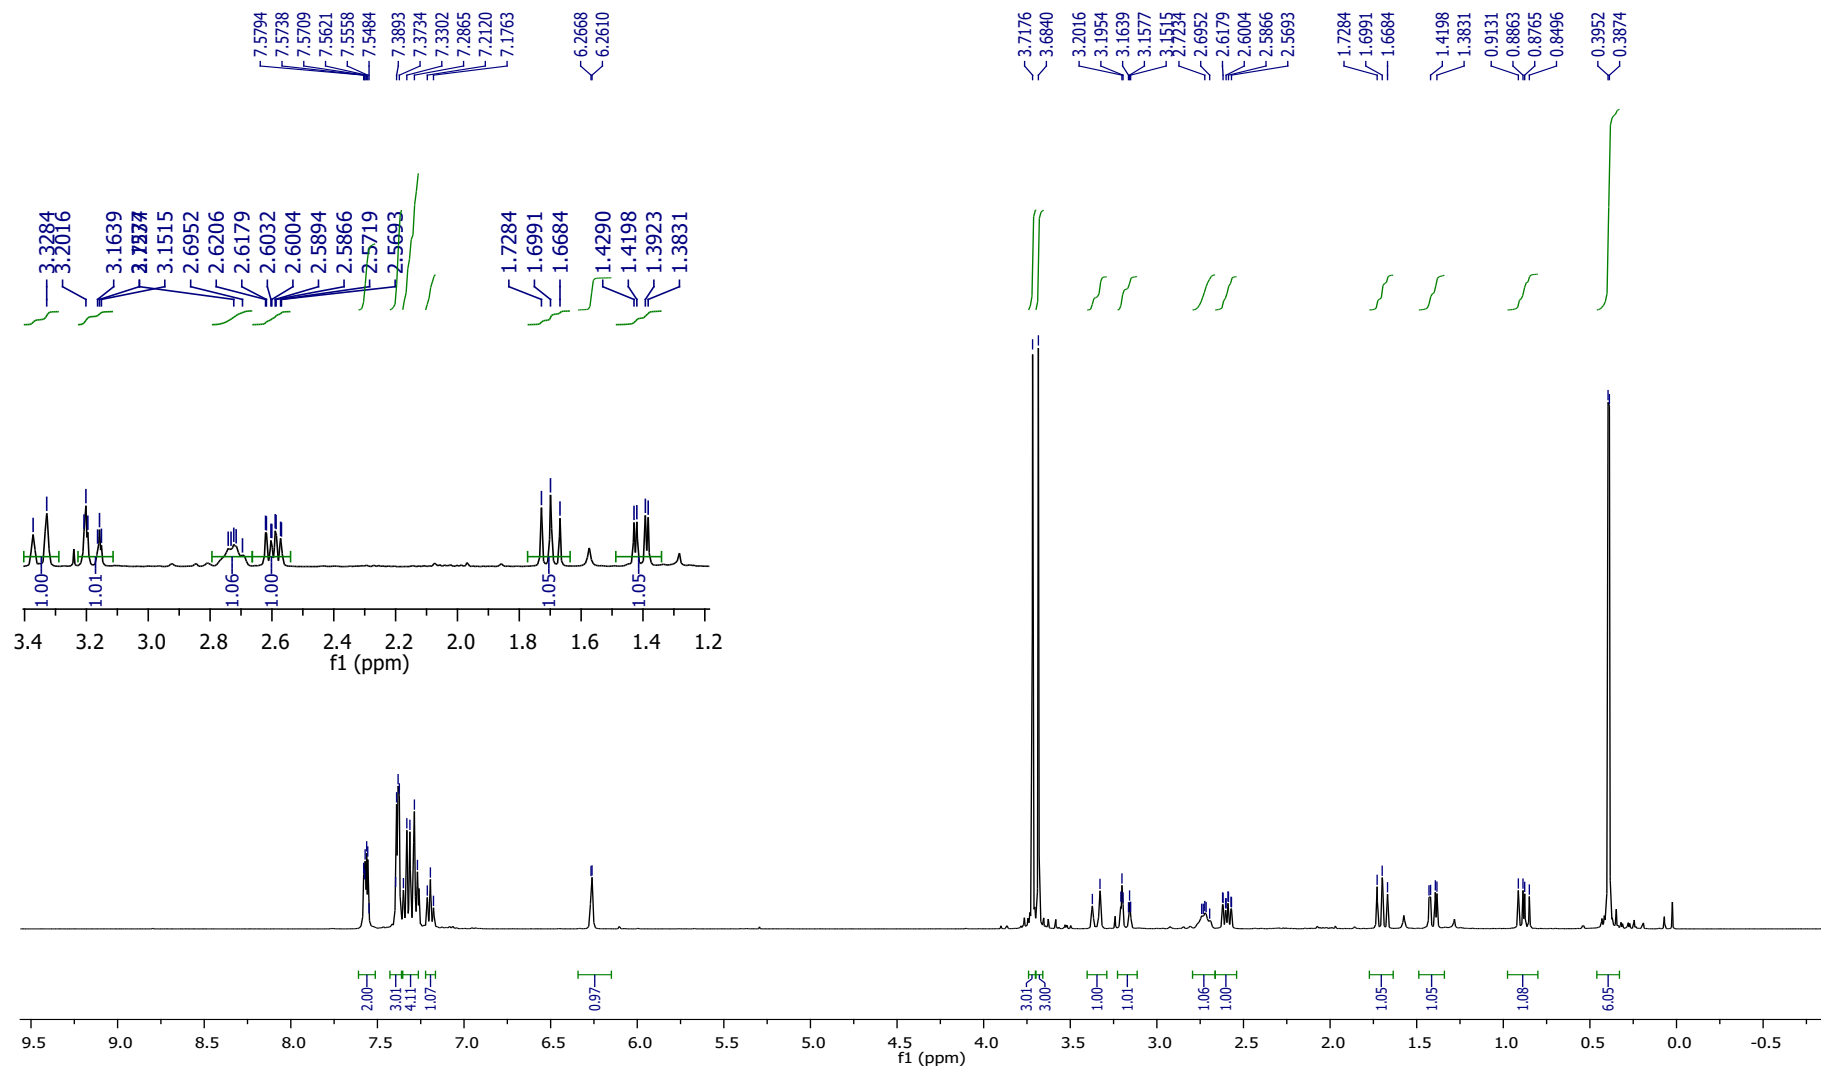

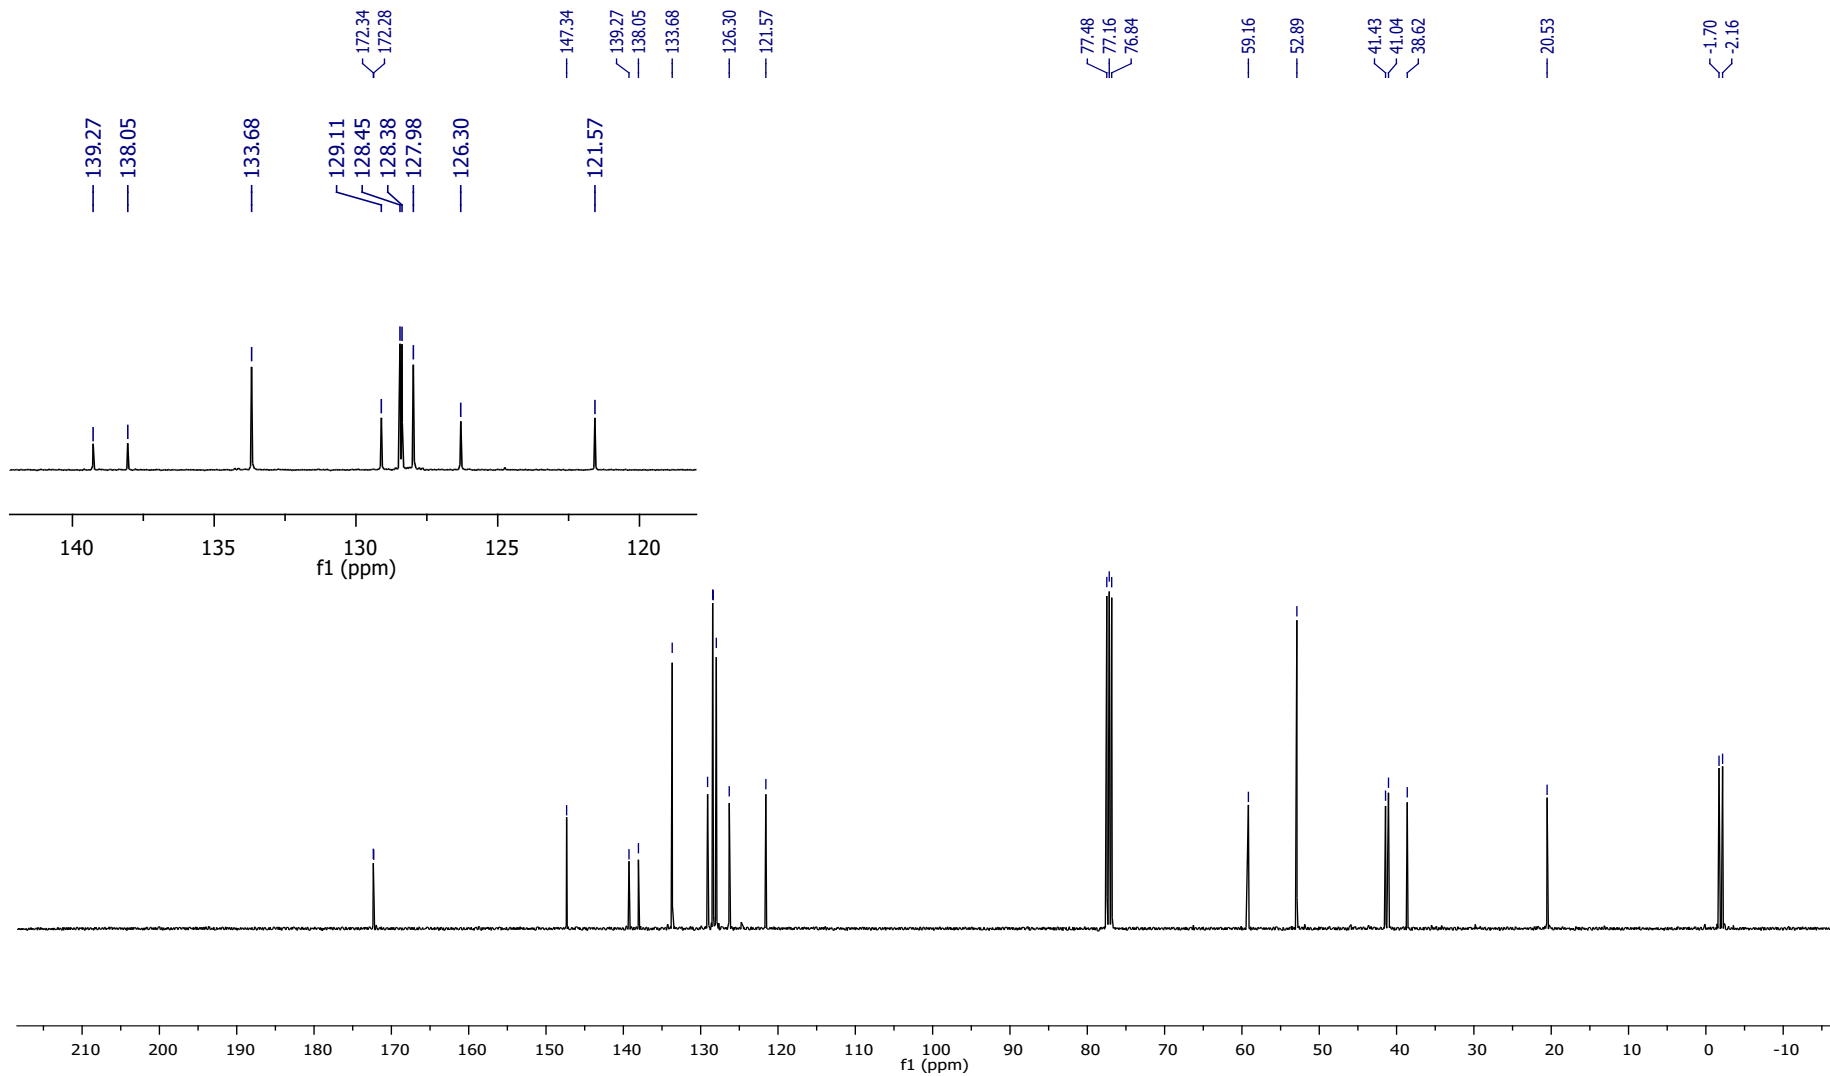

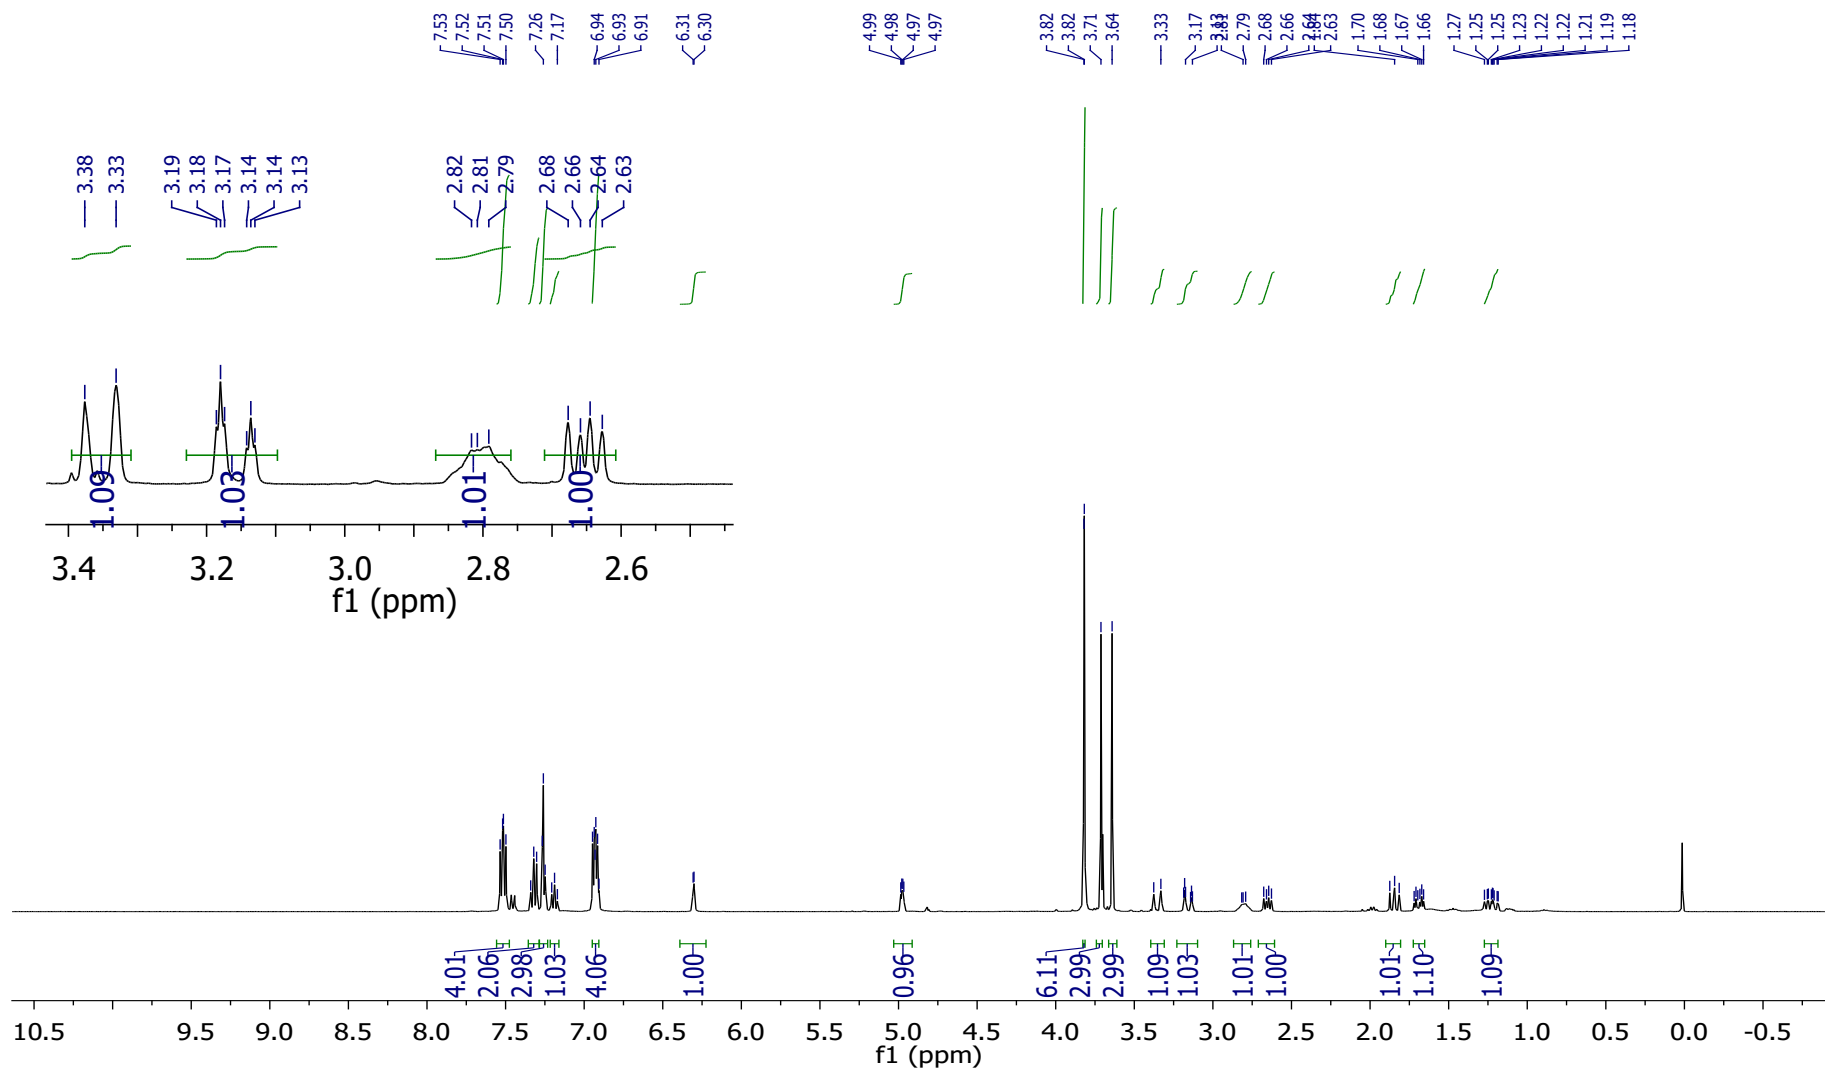

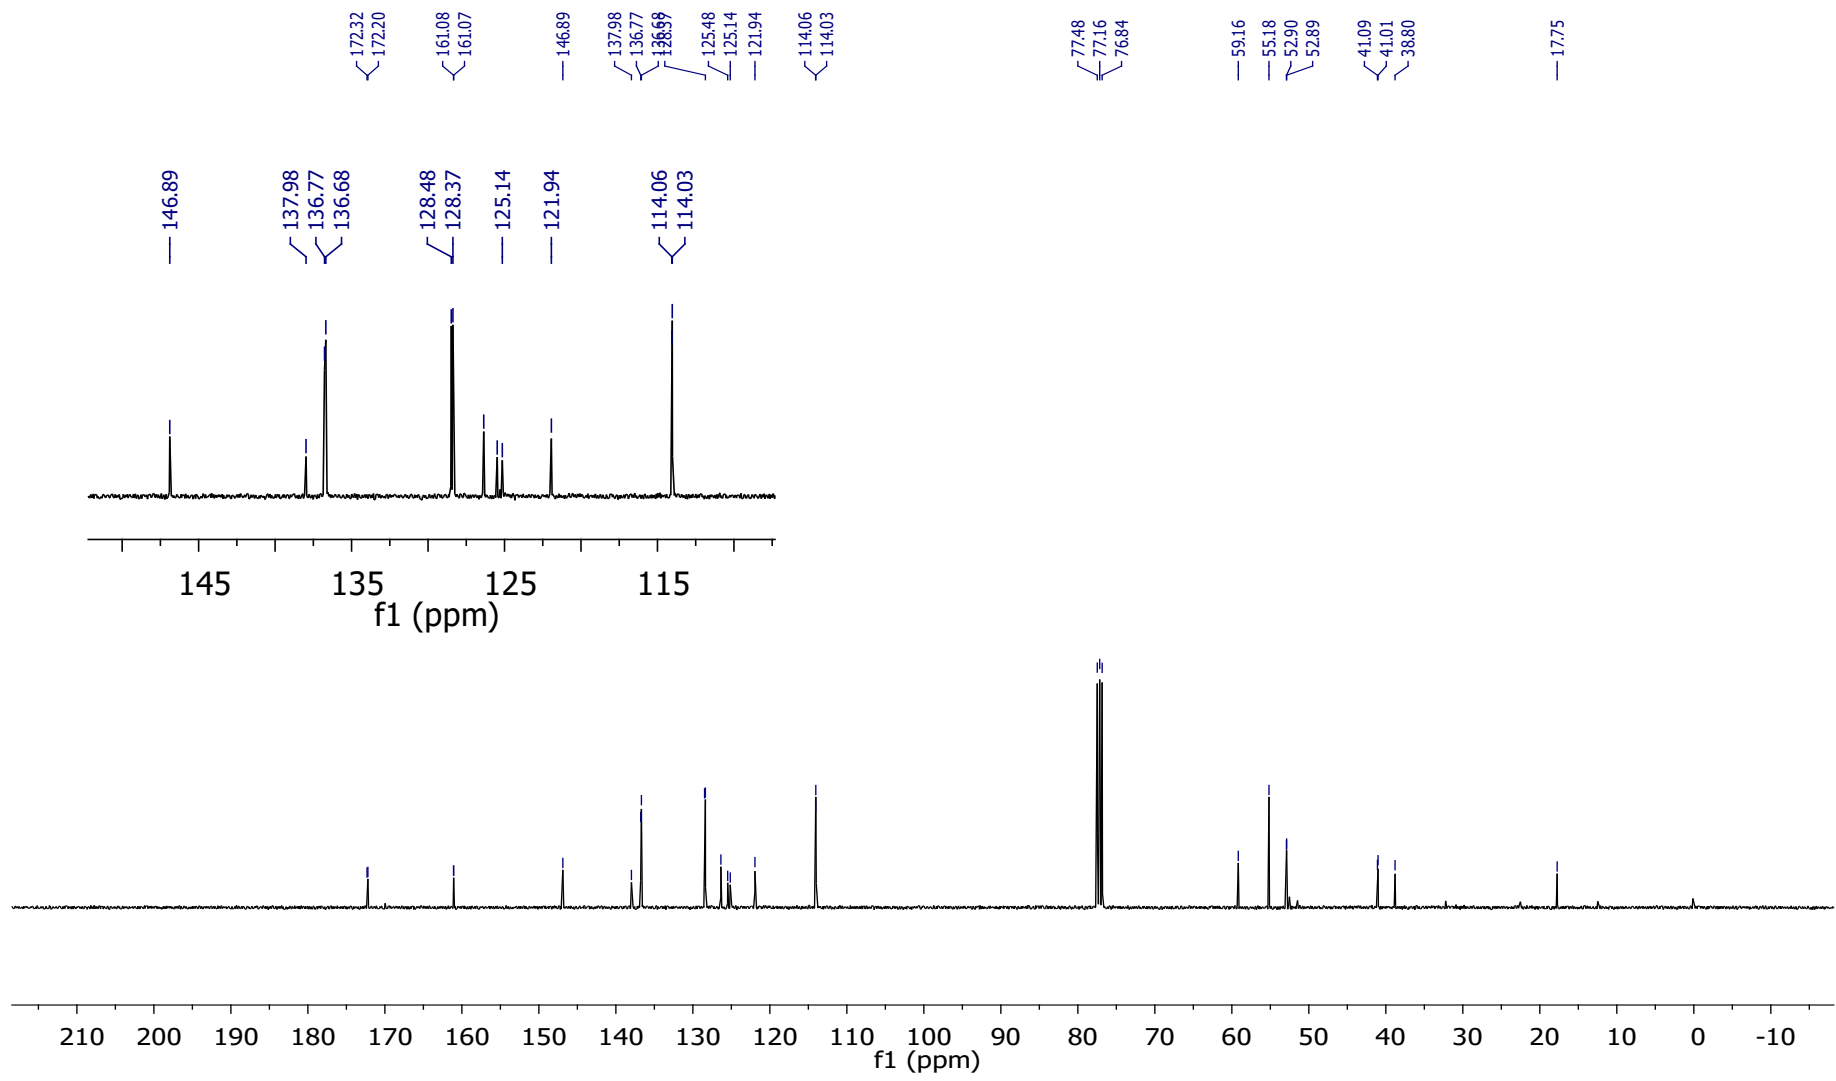

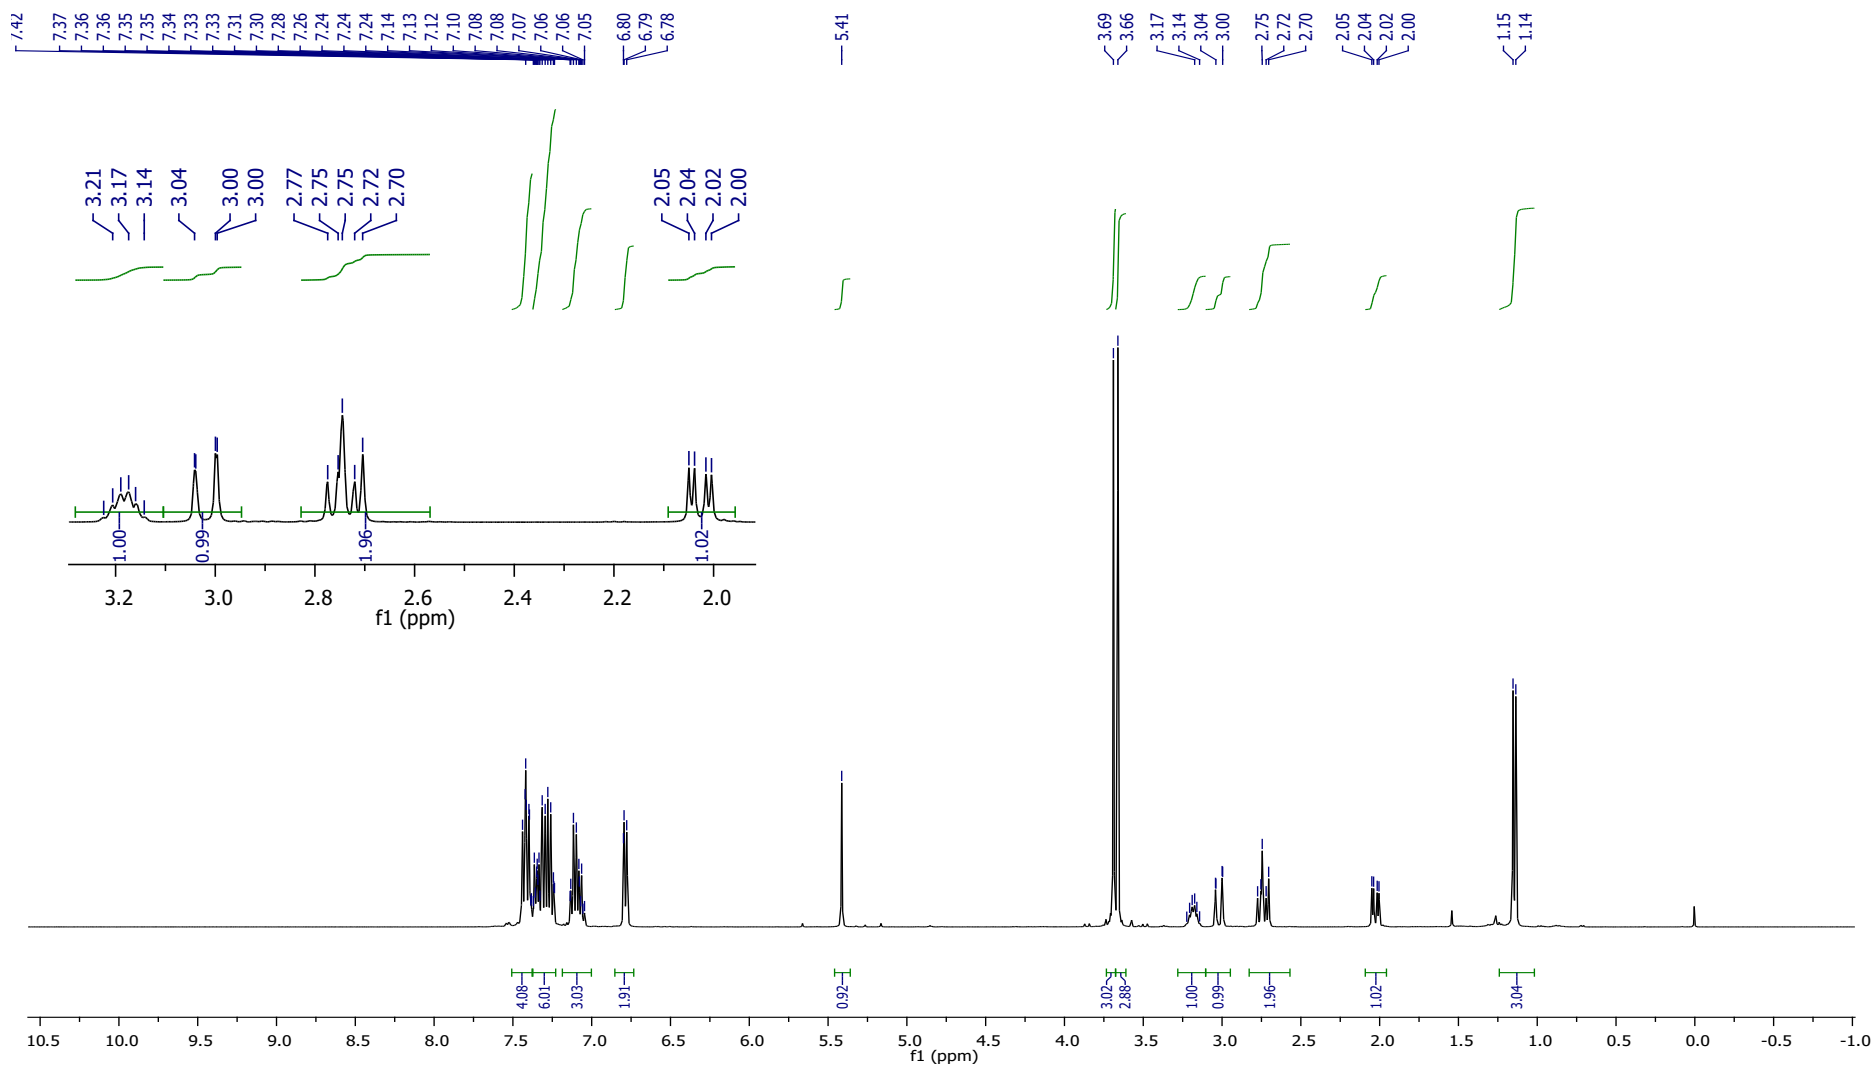

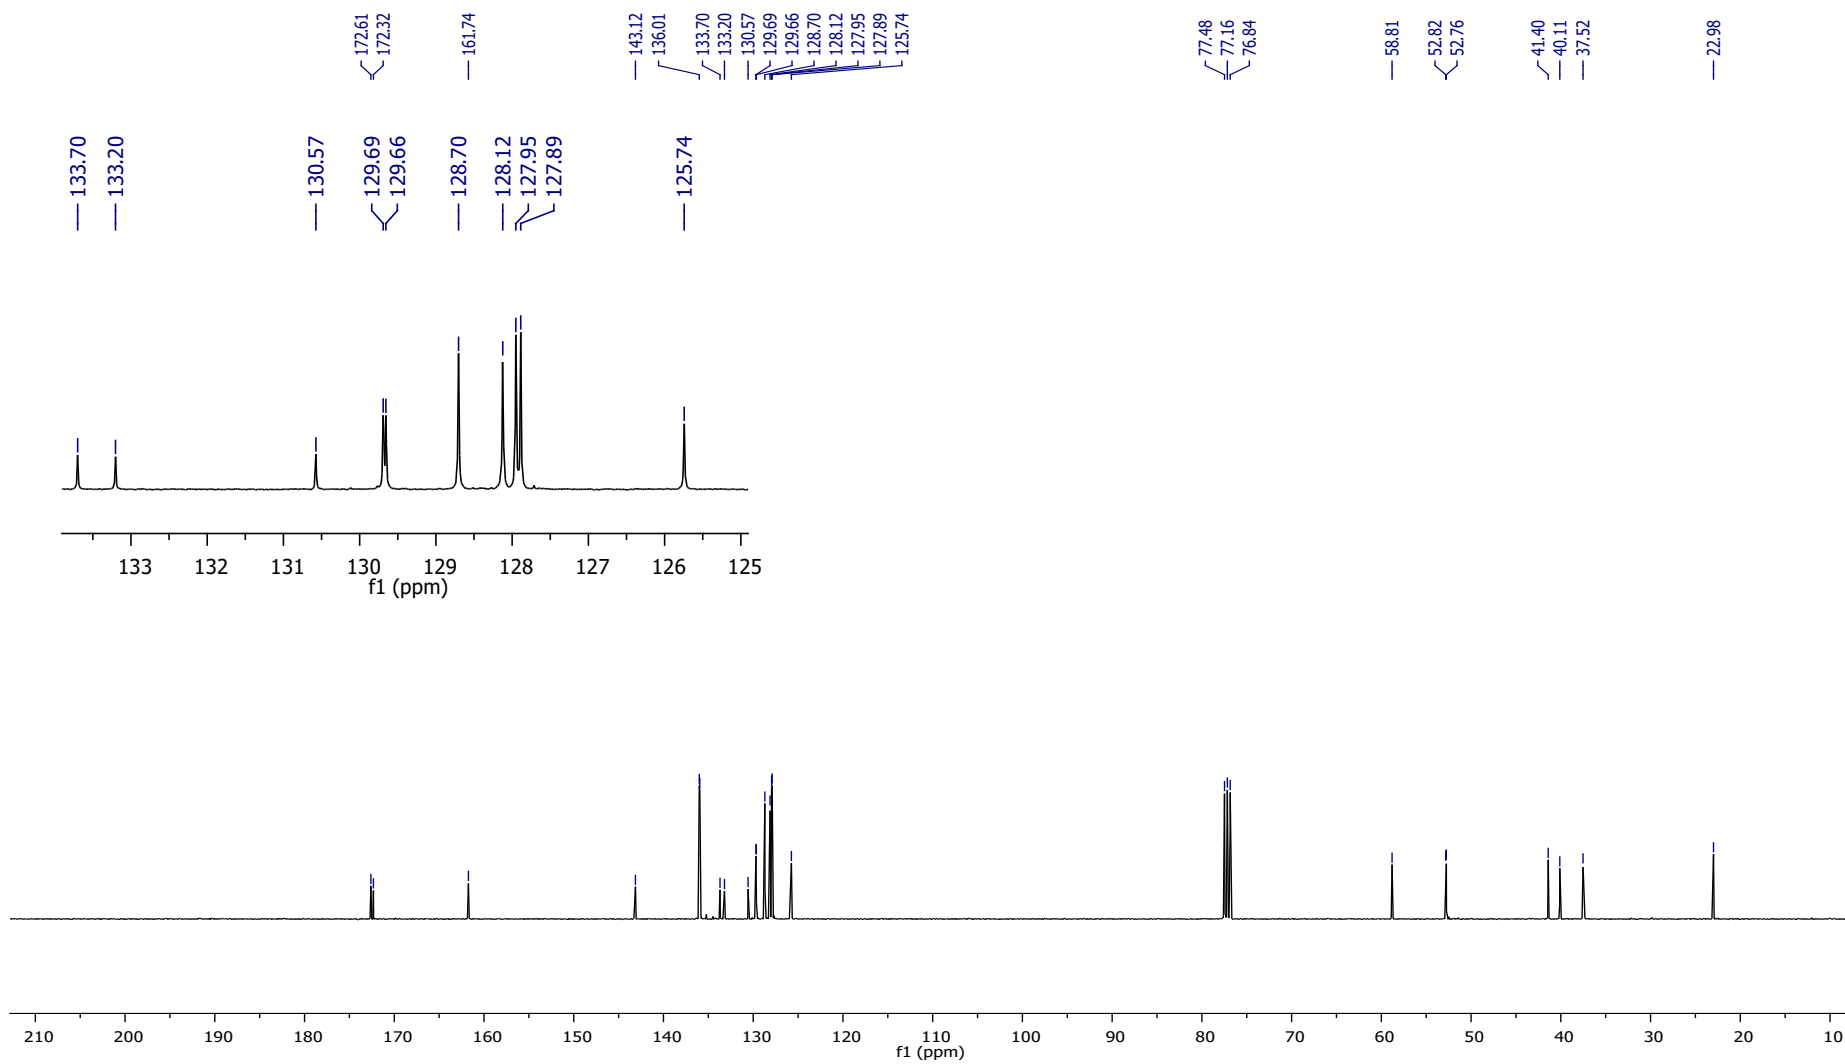



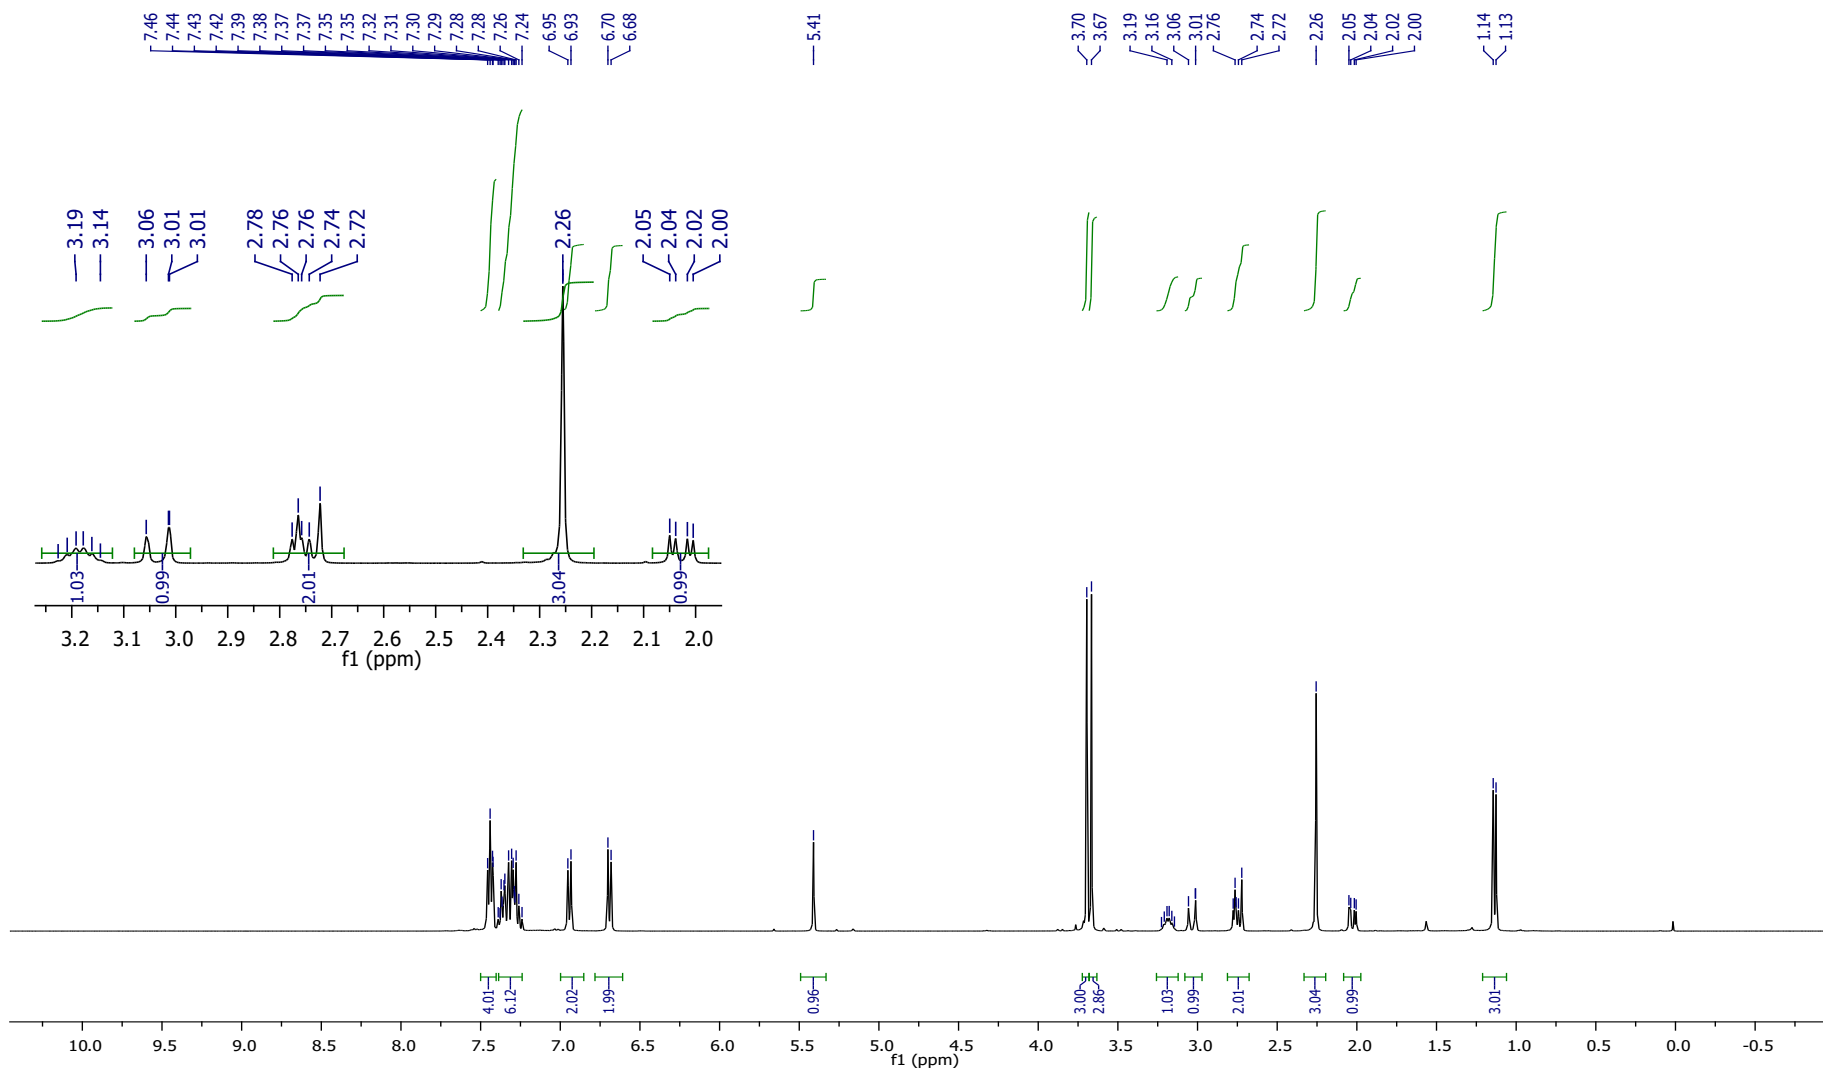

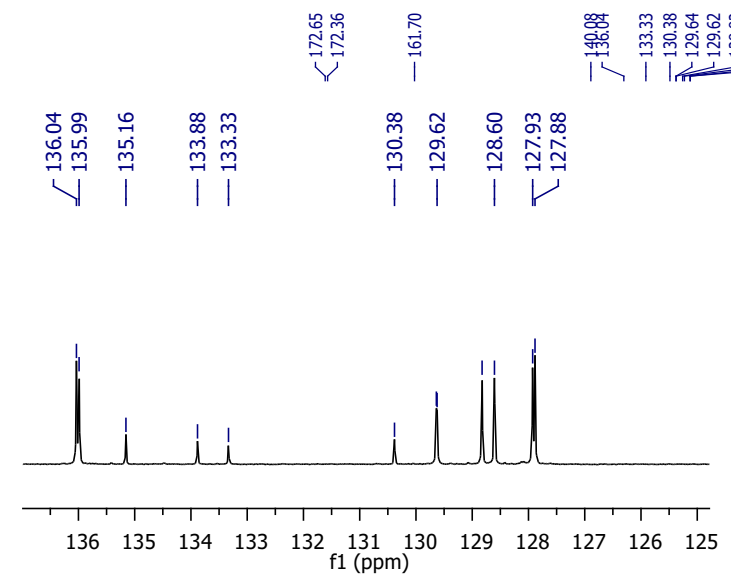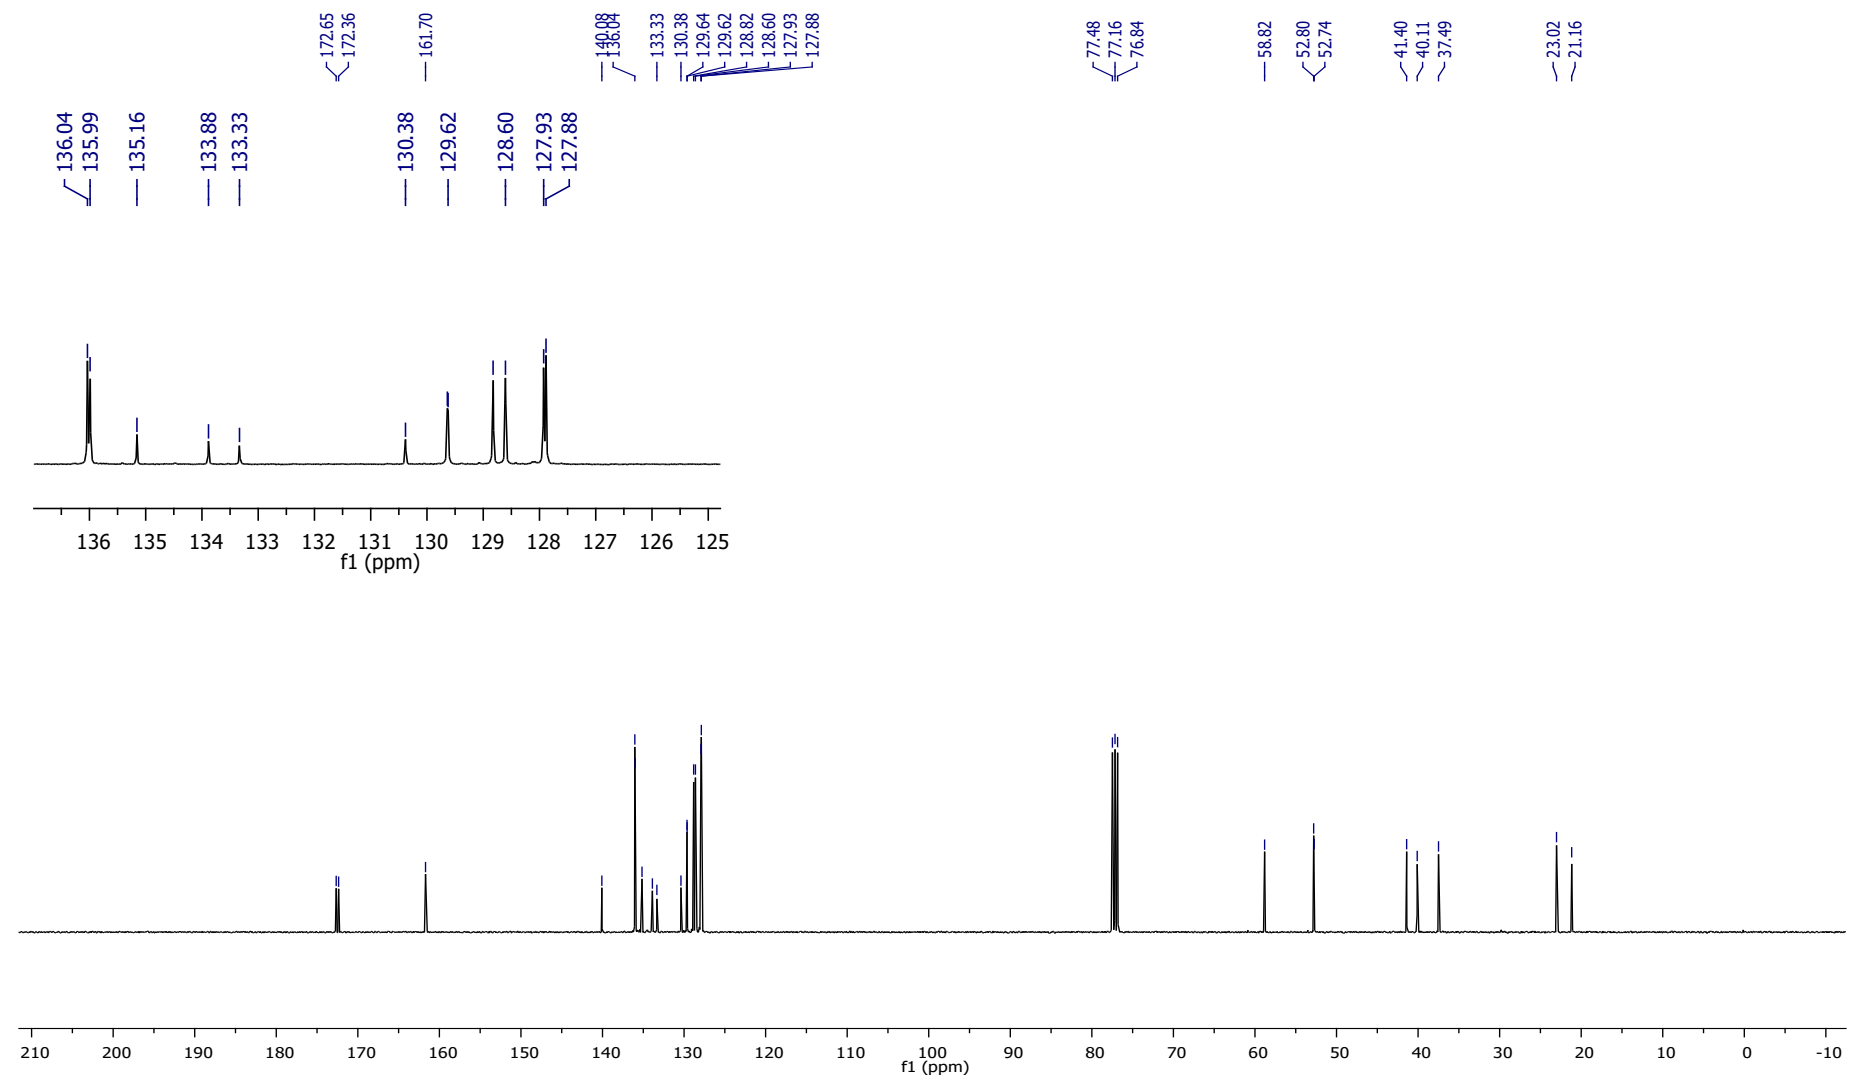

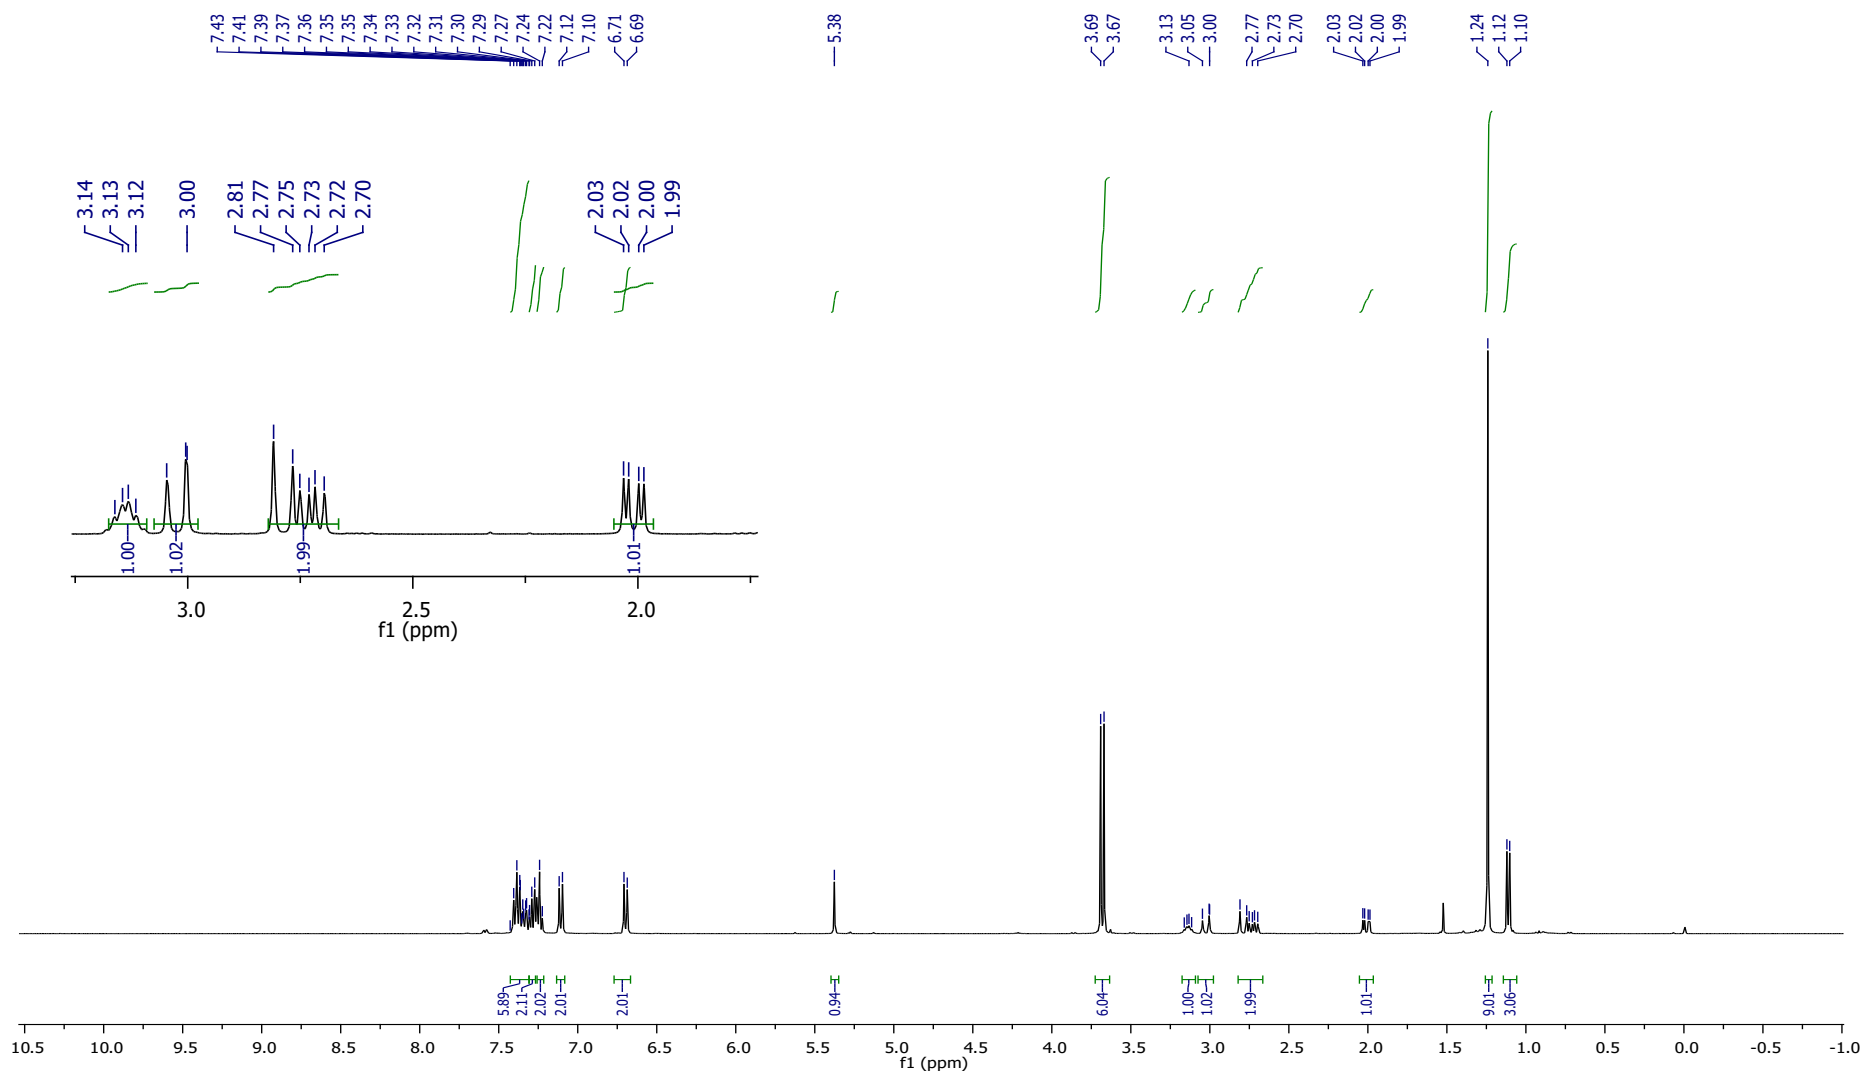

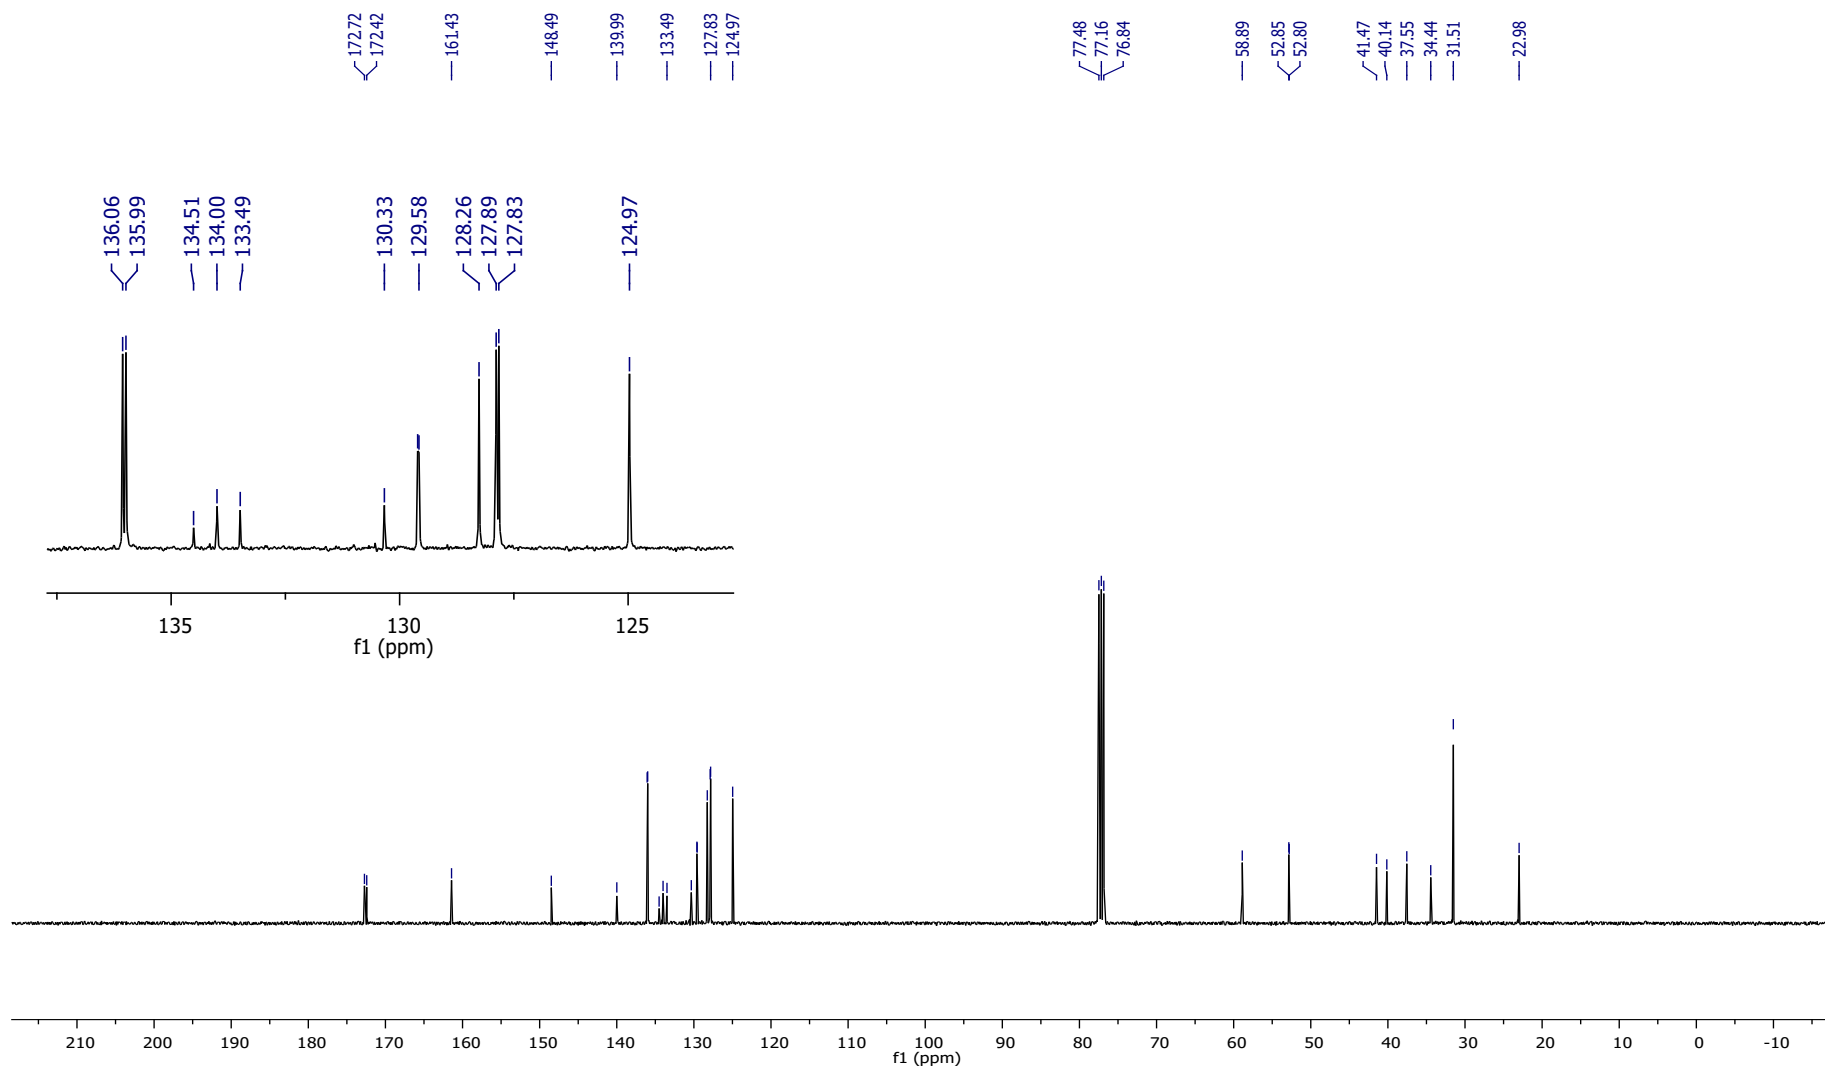

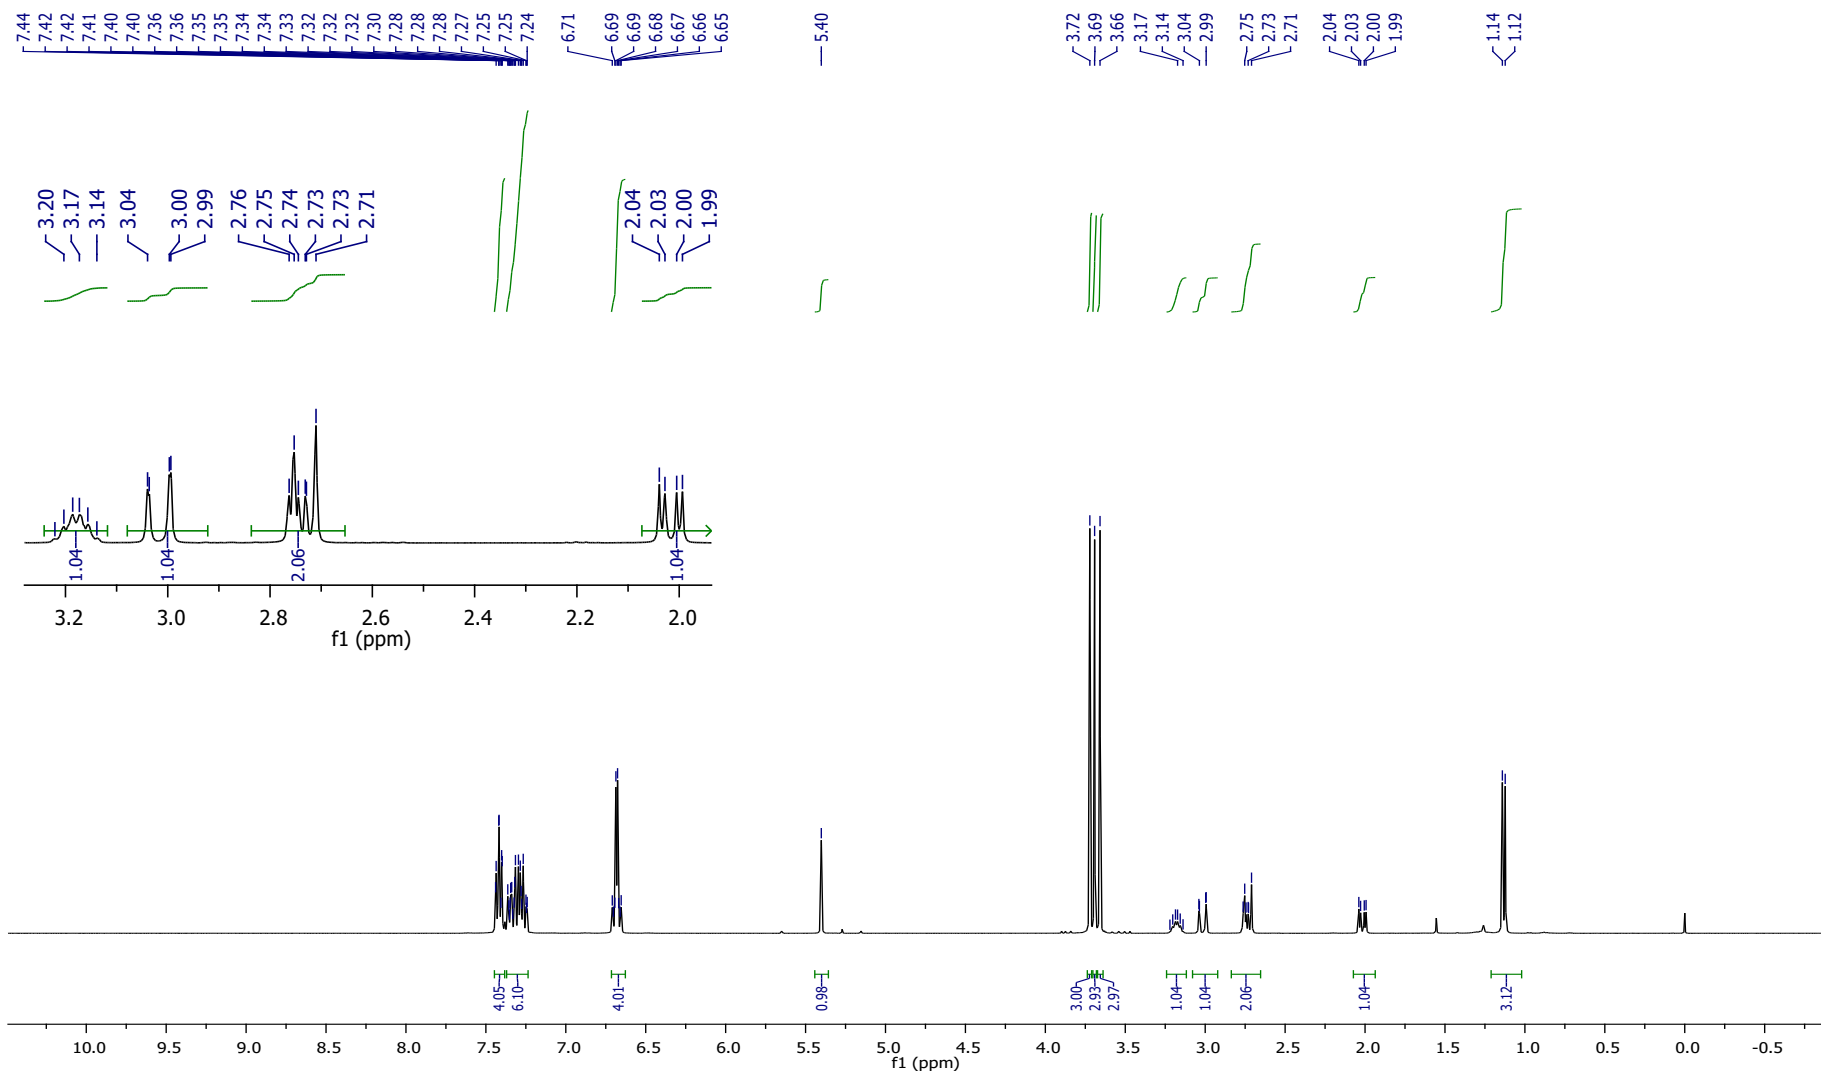

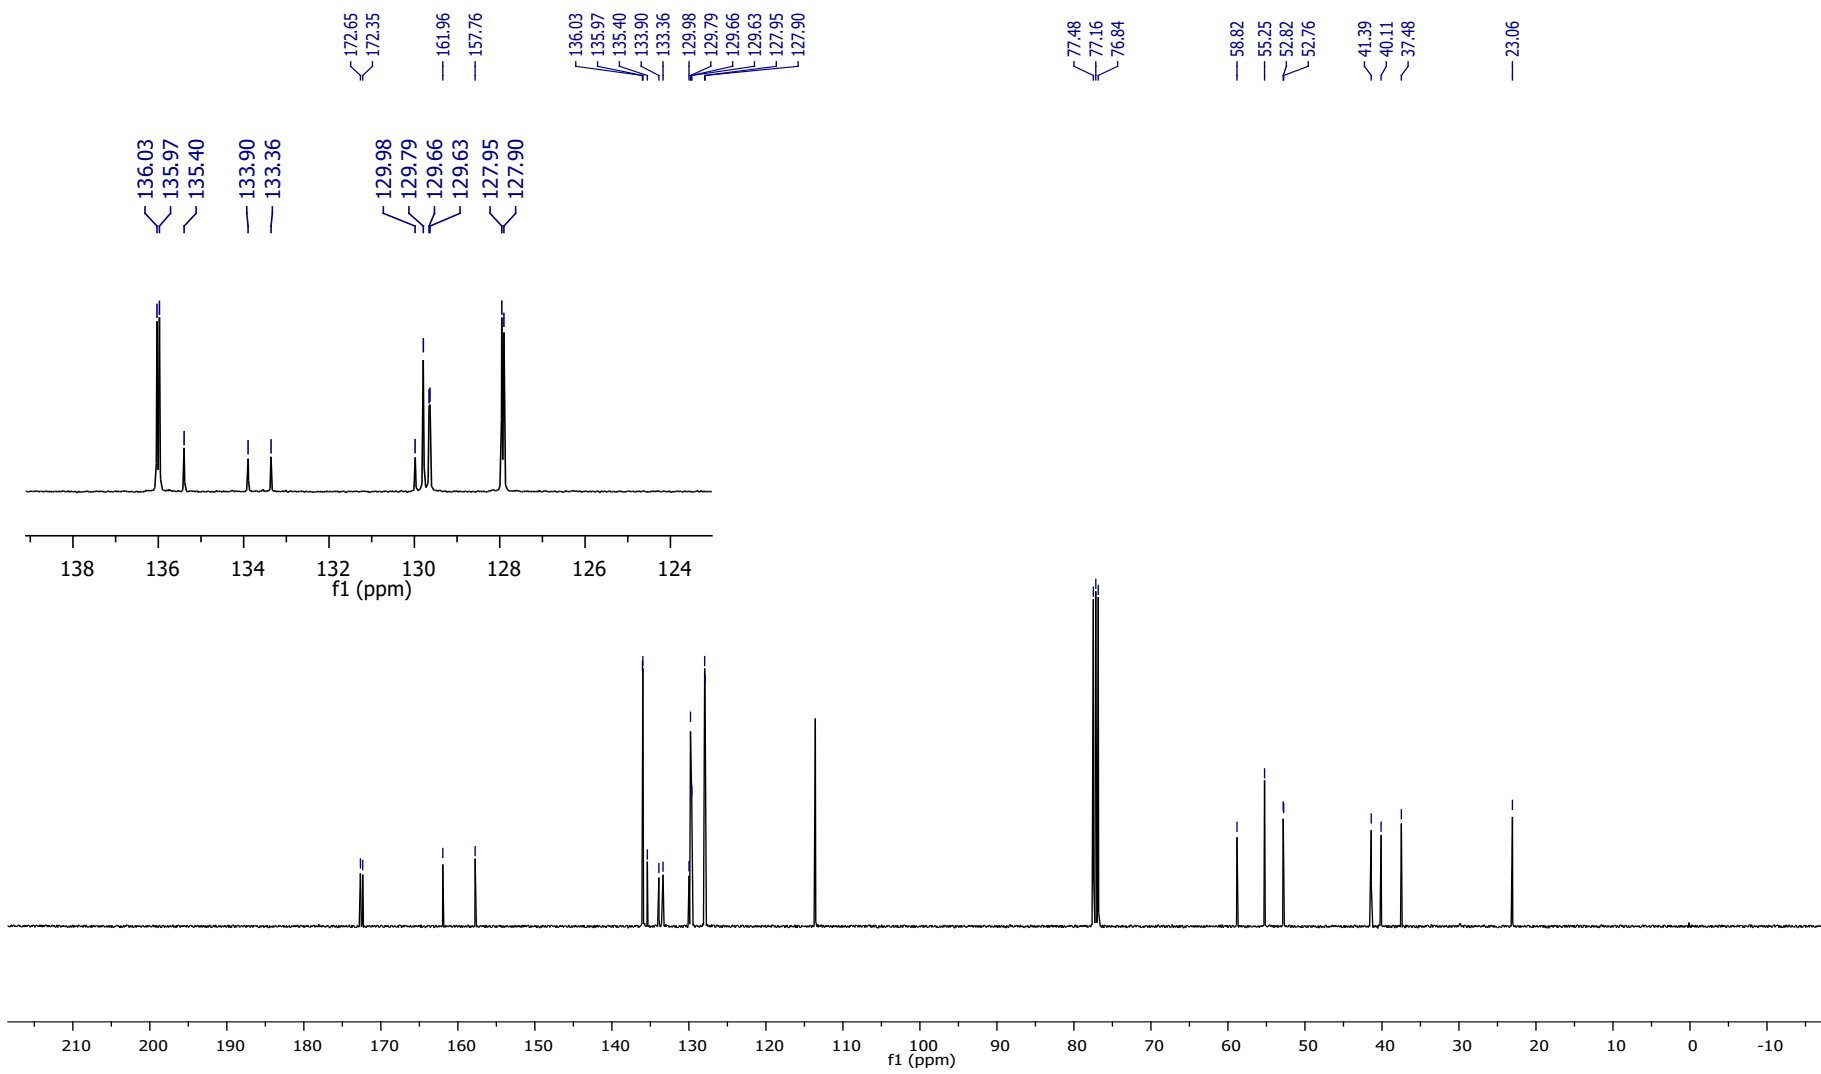

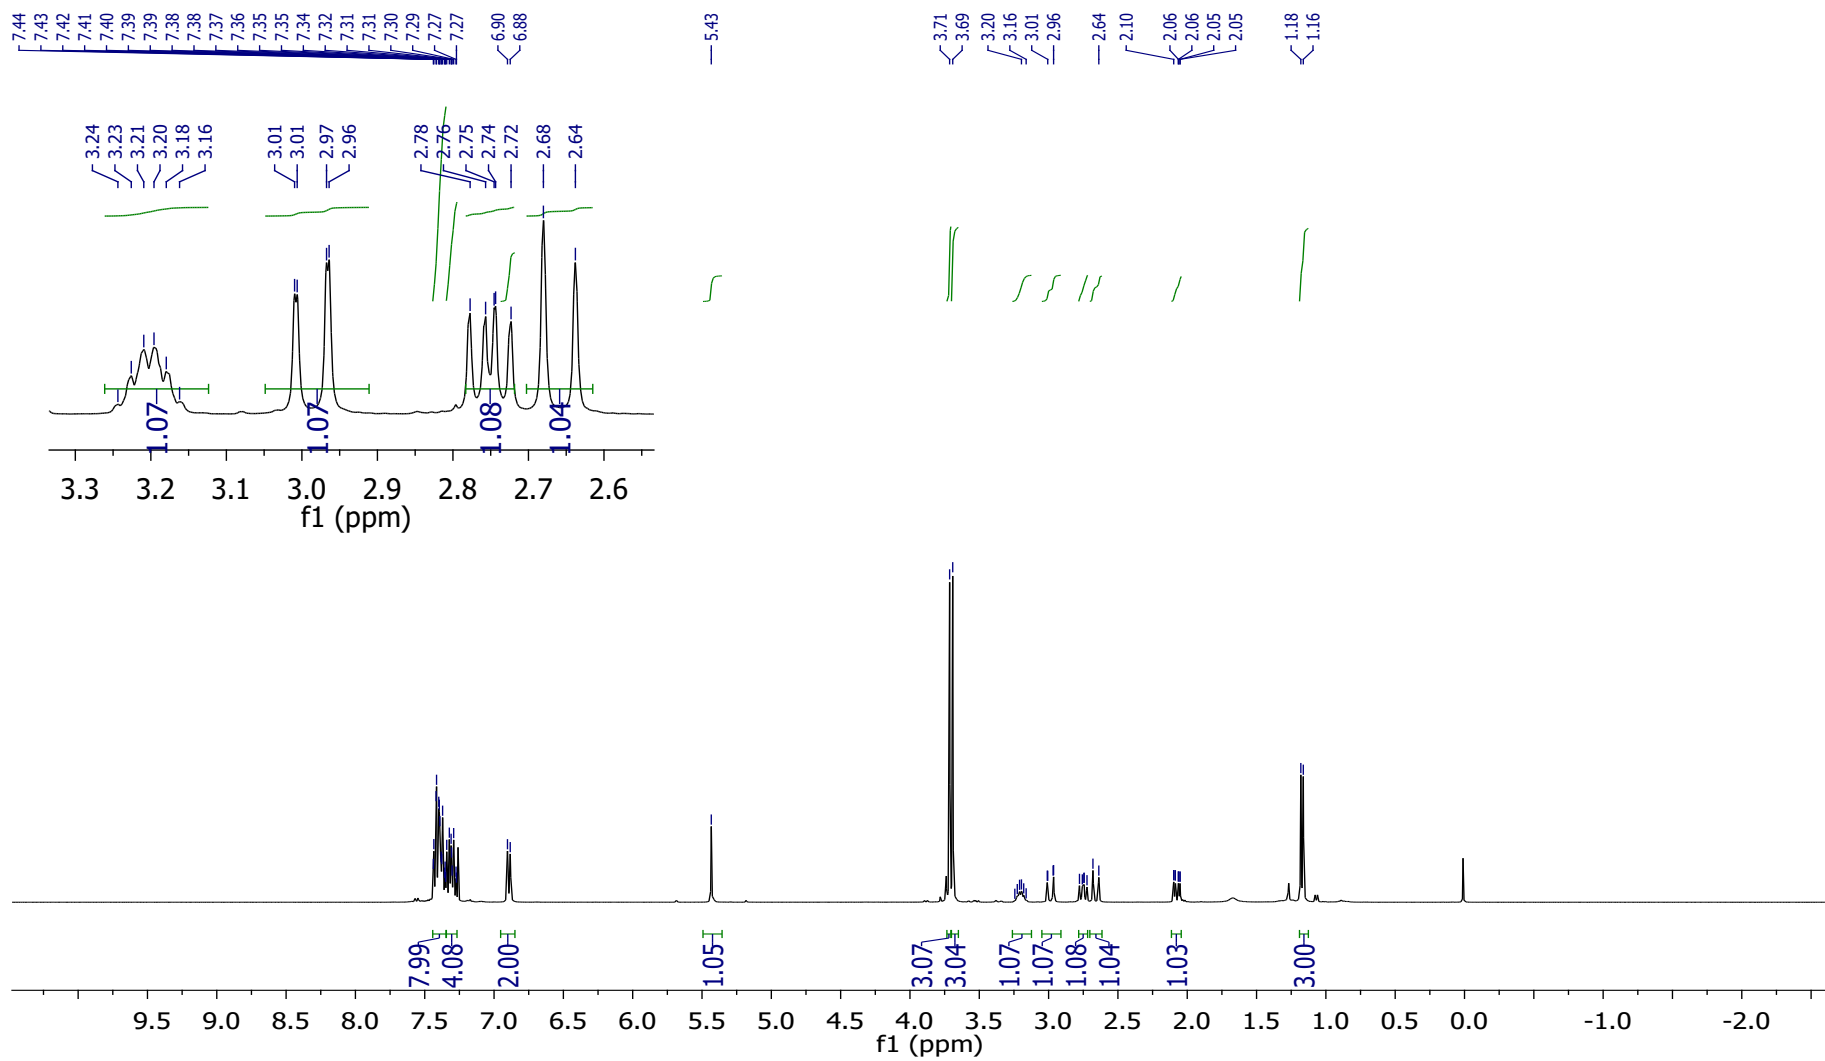

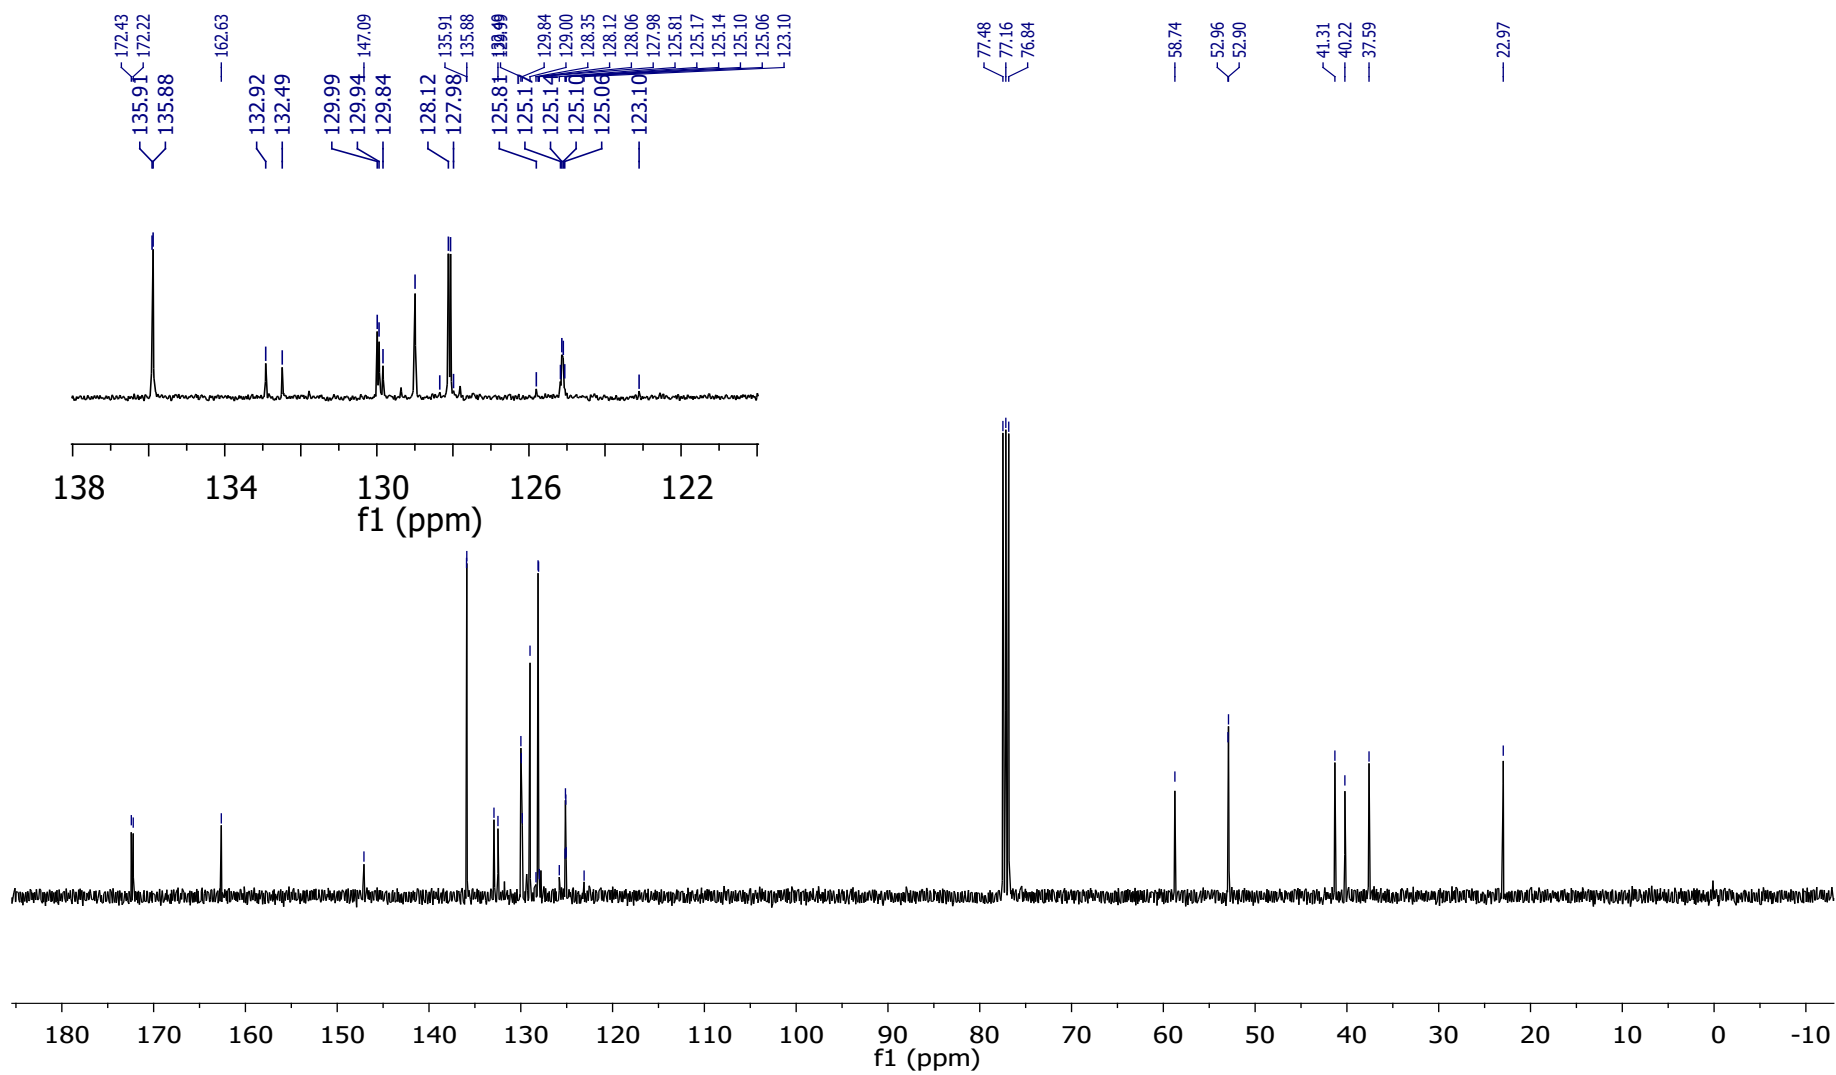



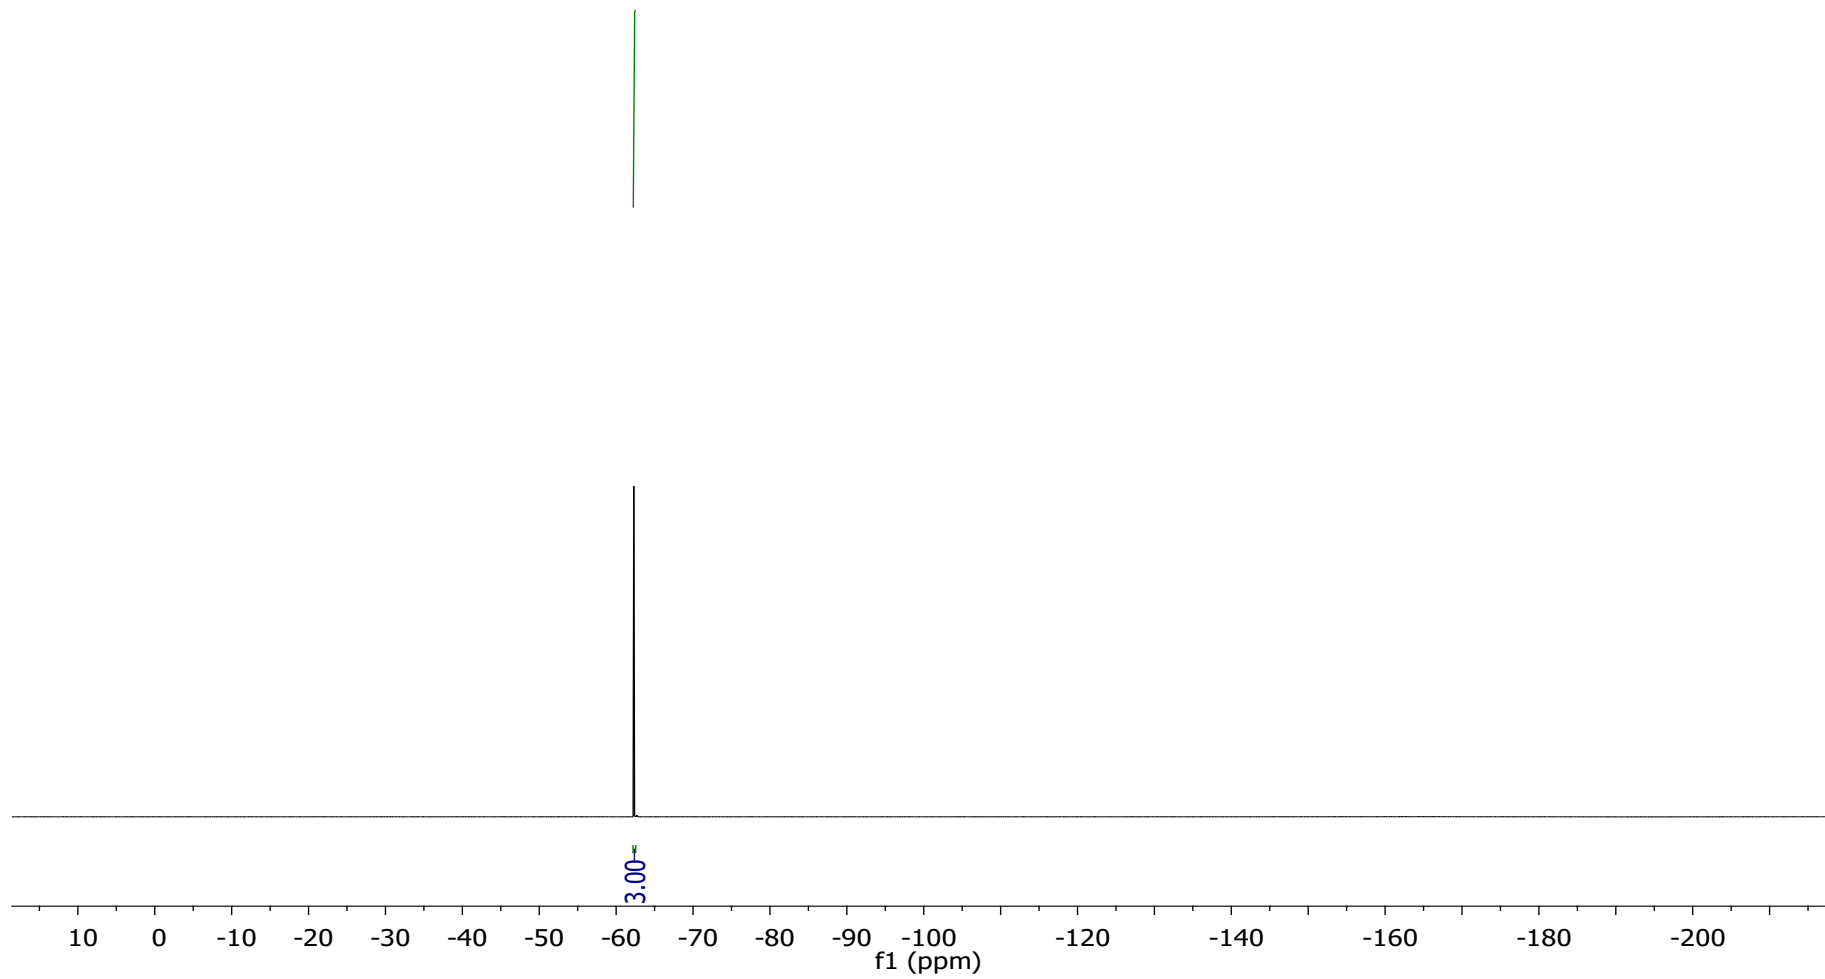

S105

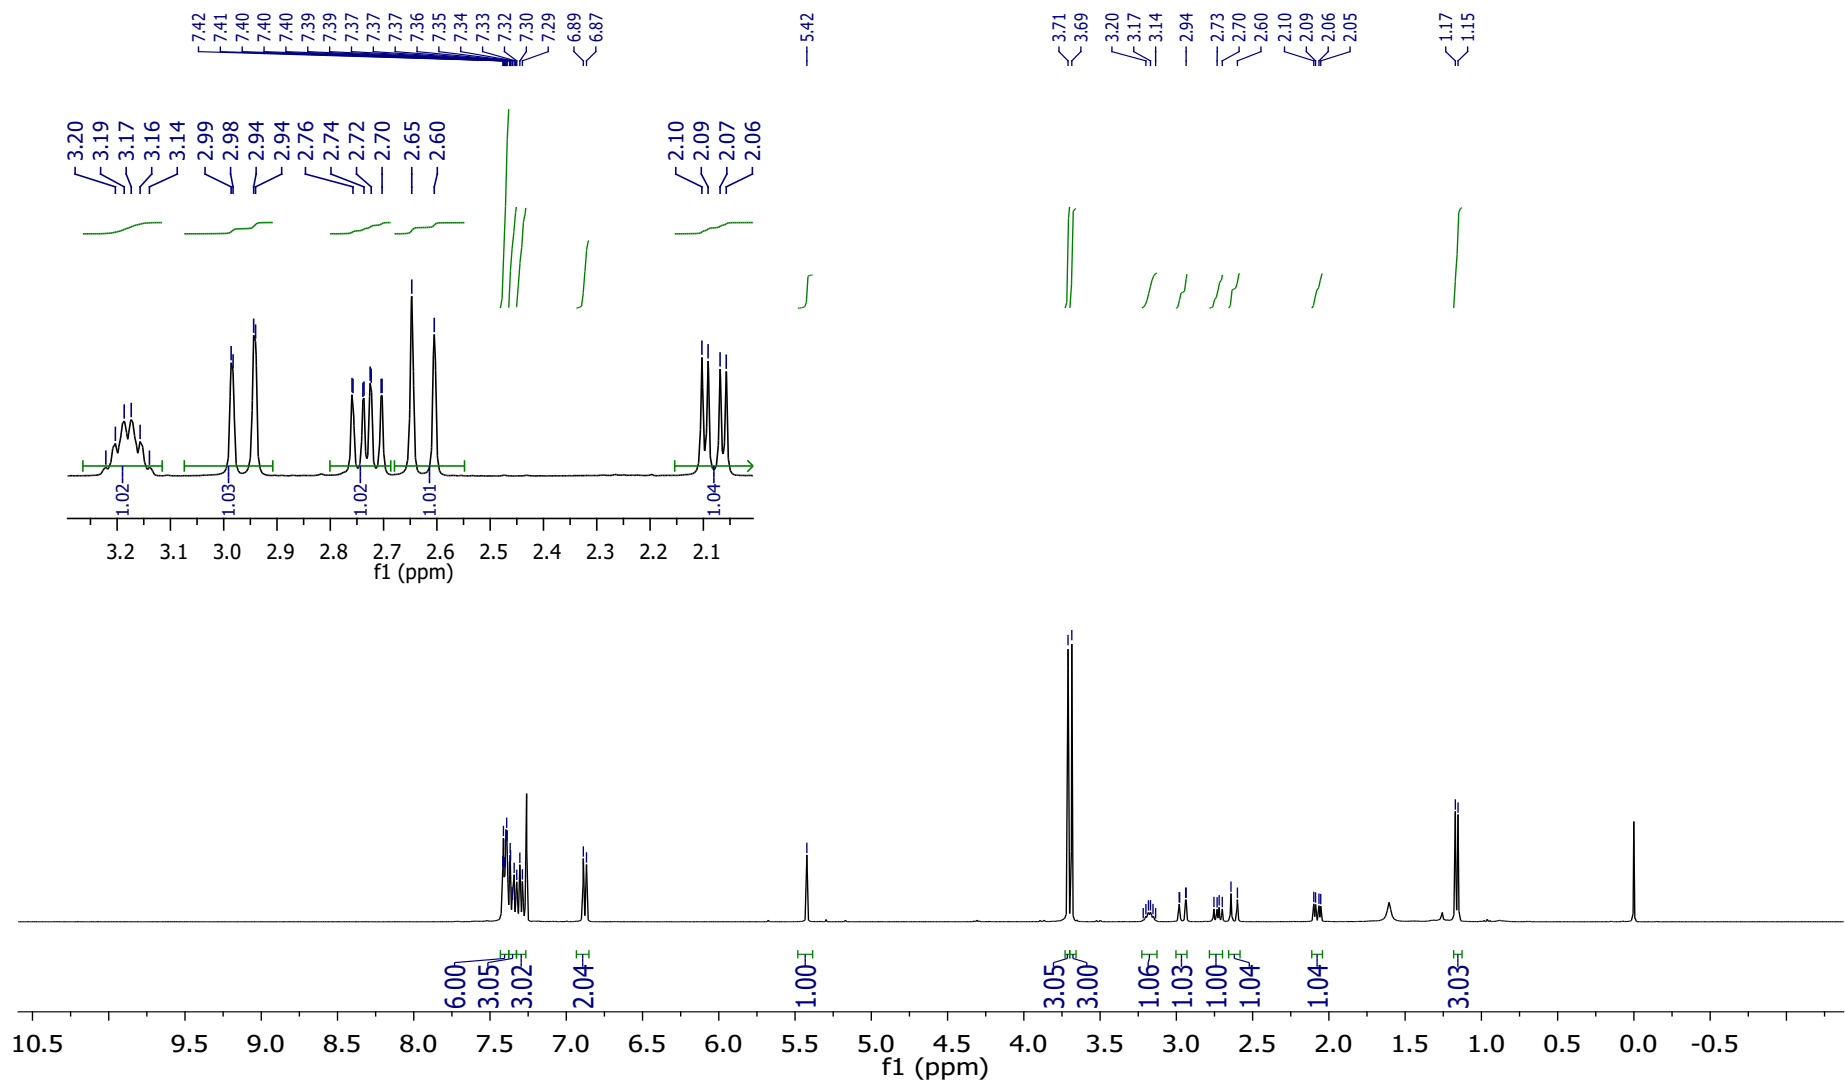

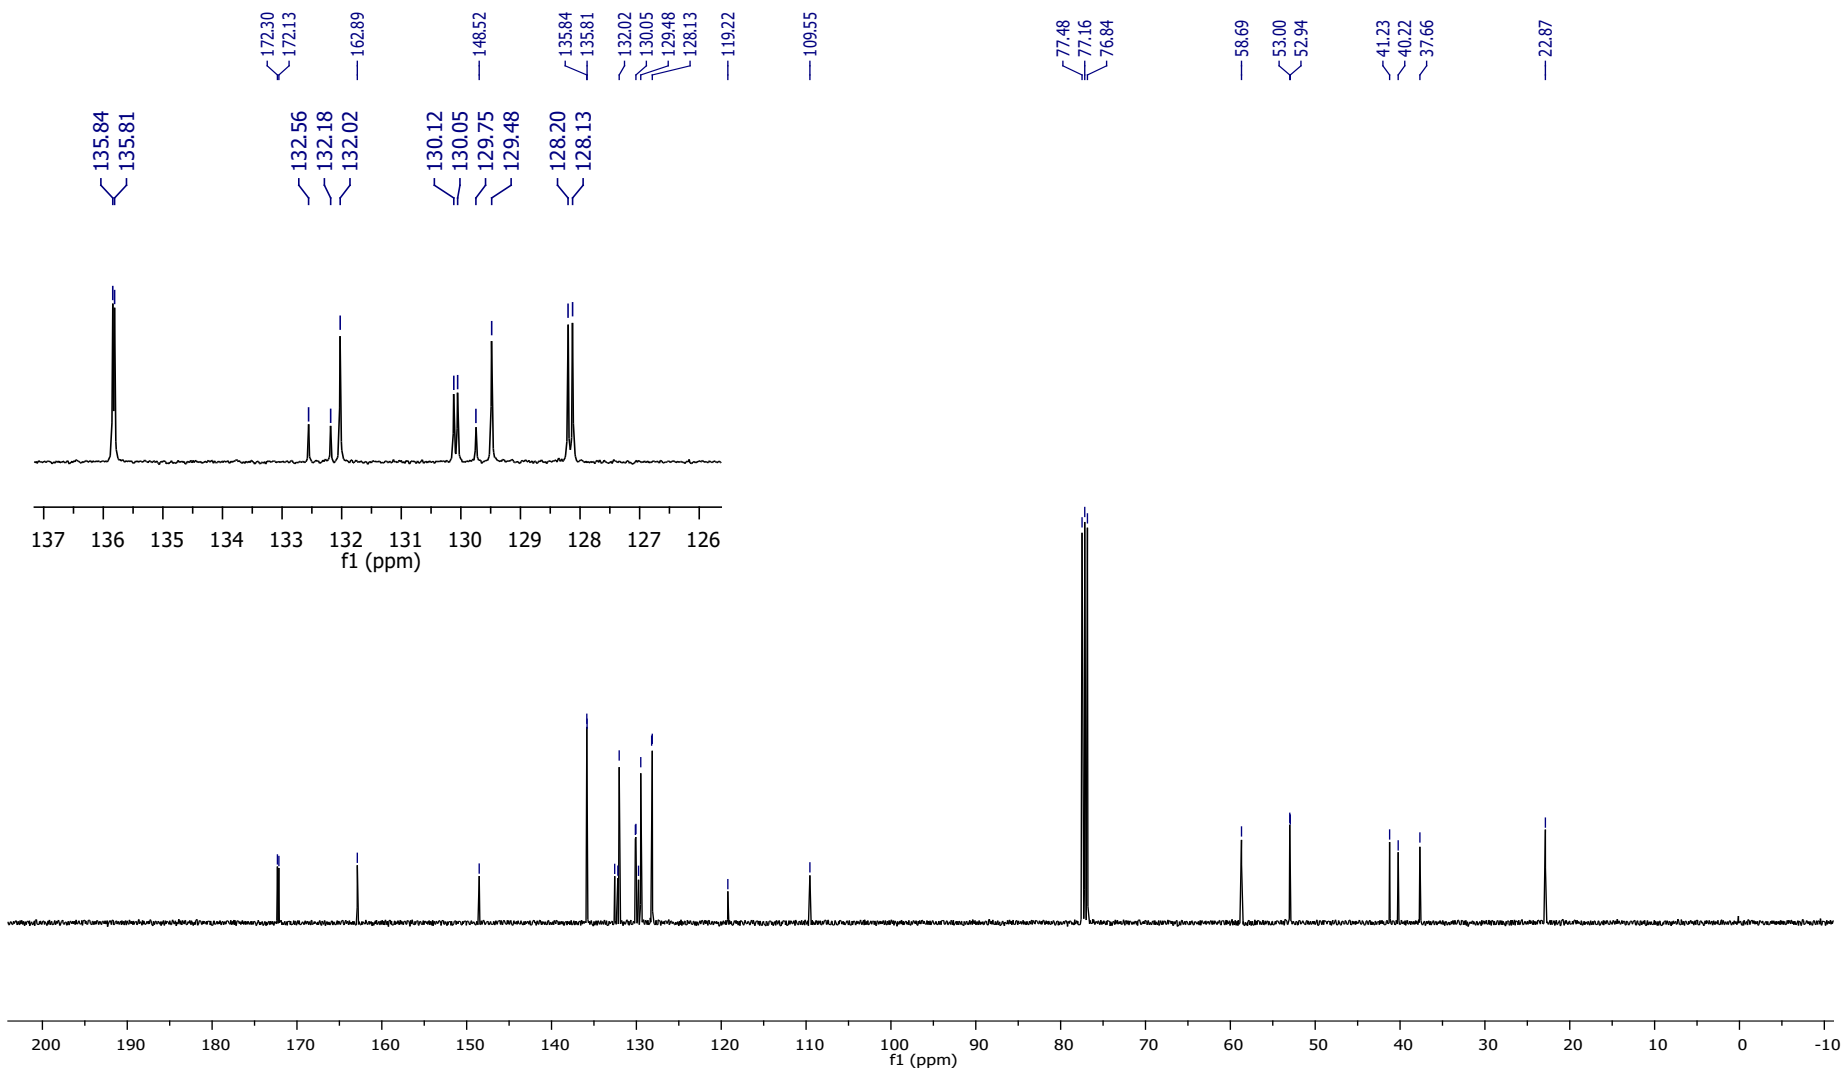

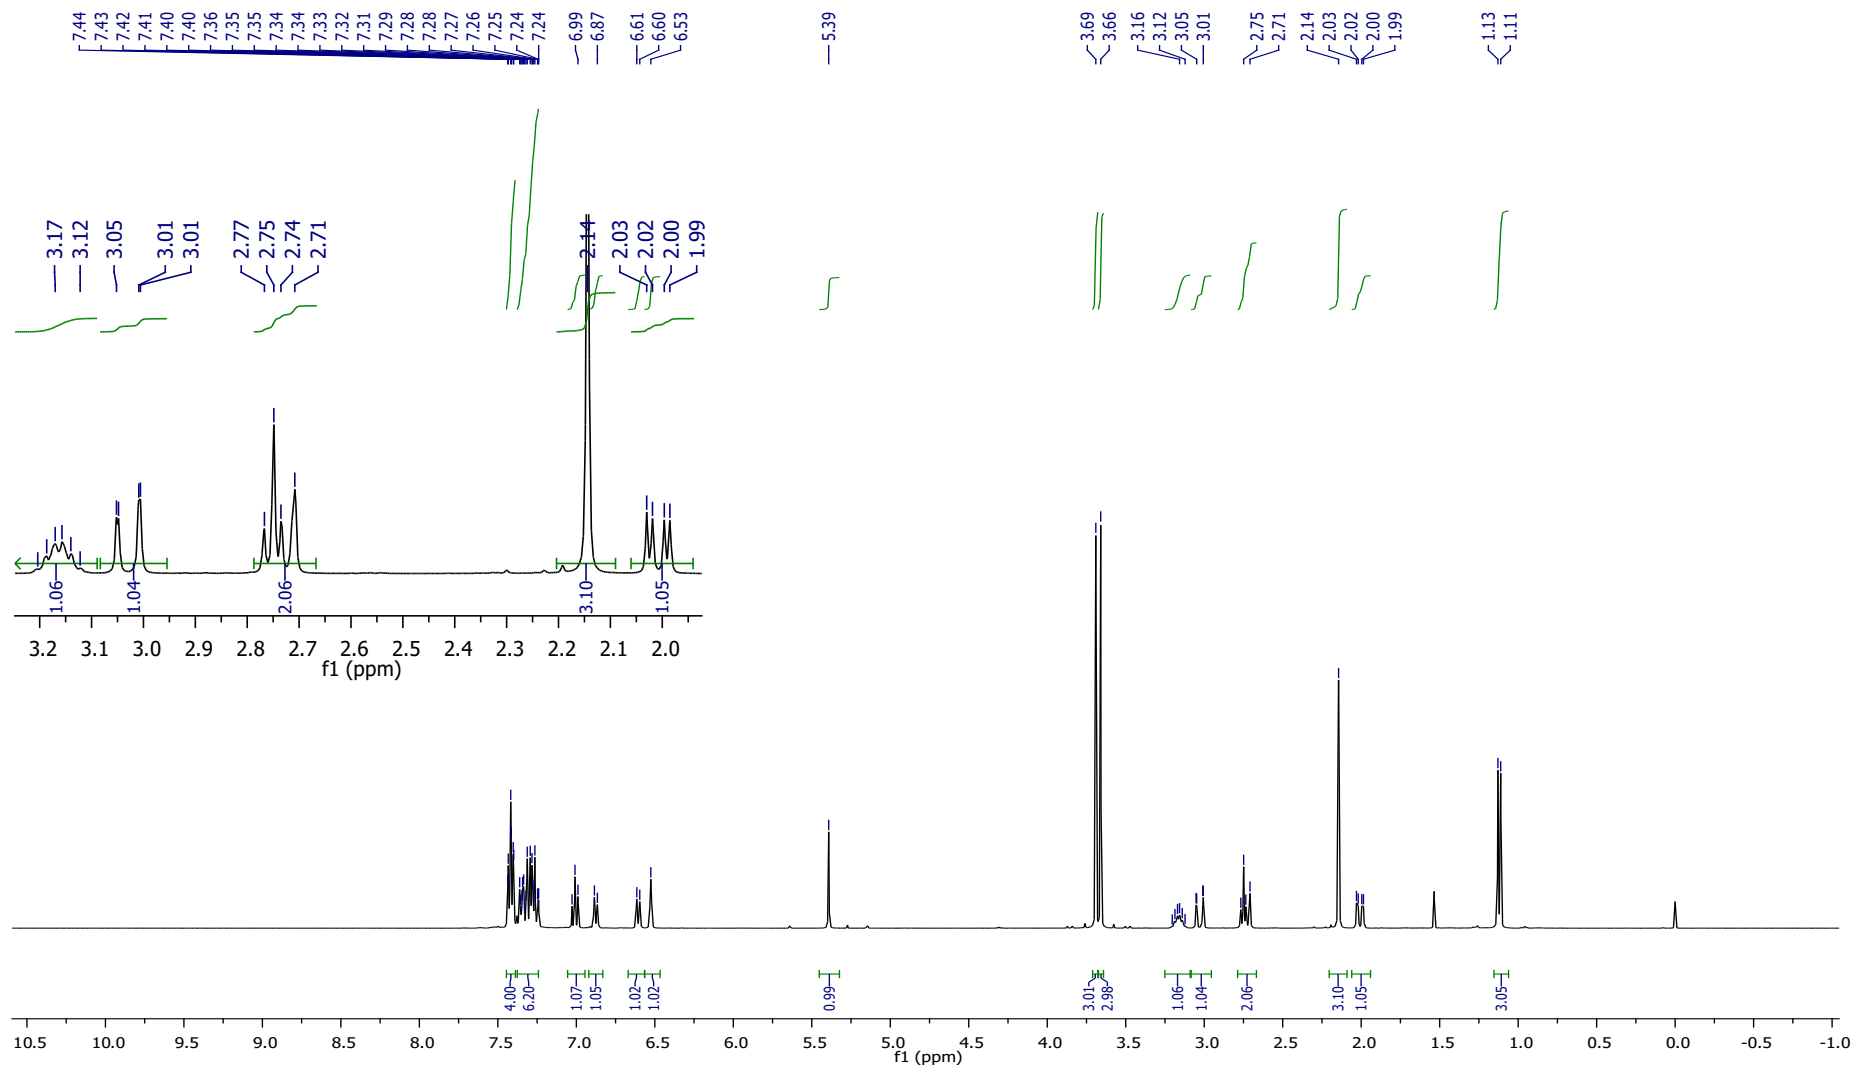

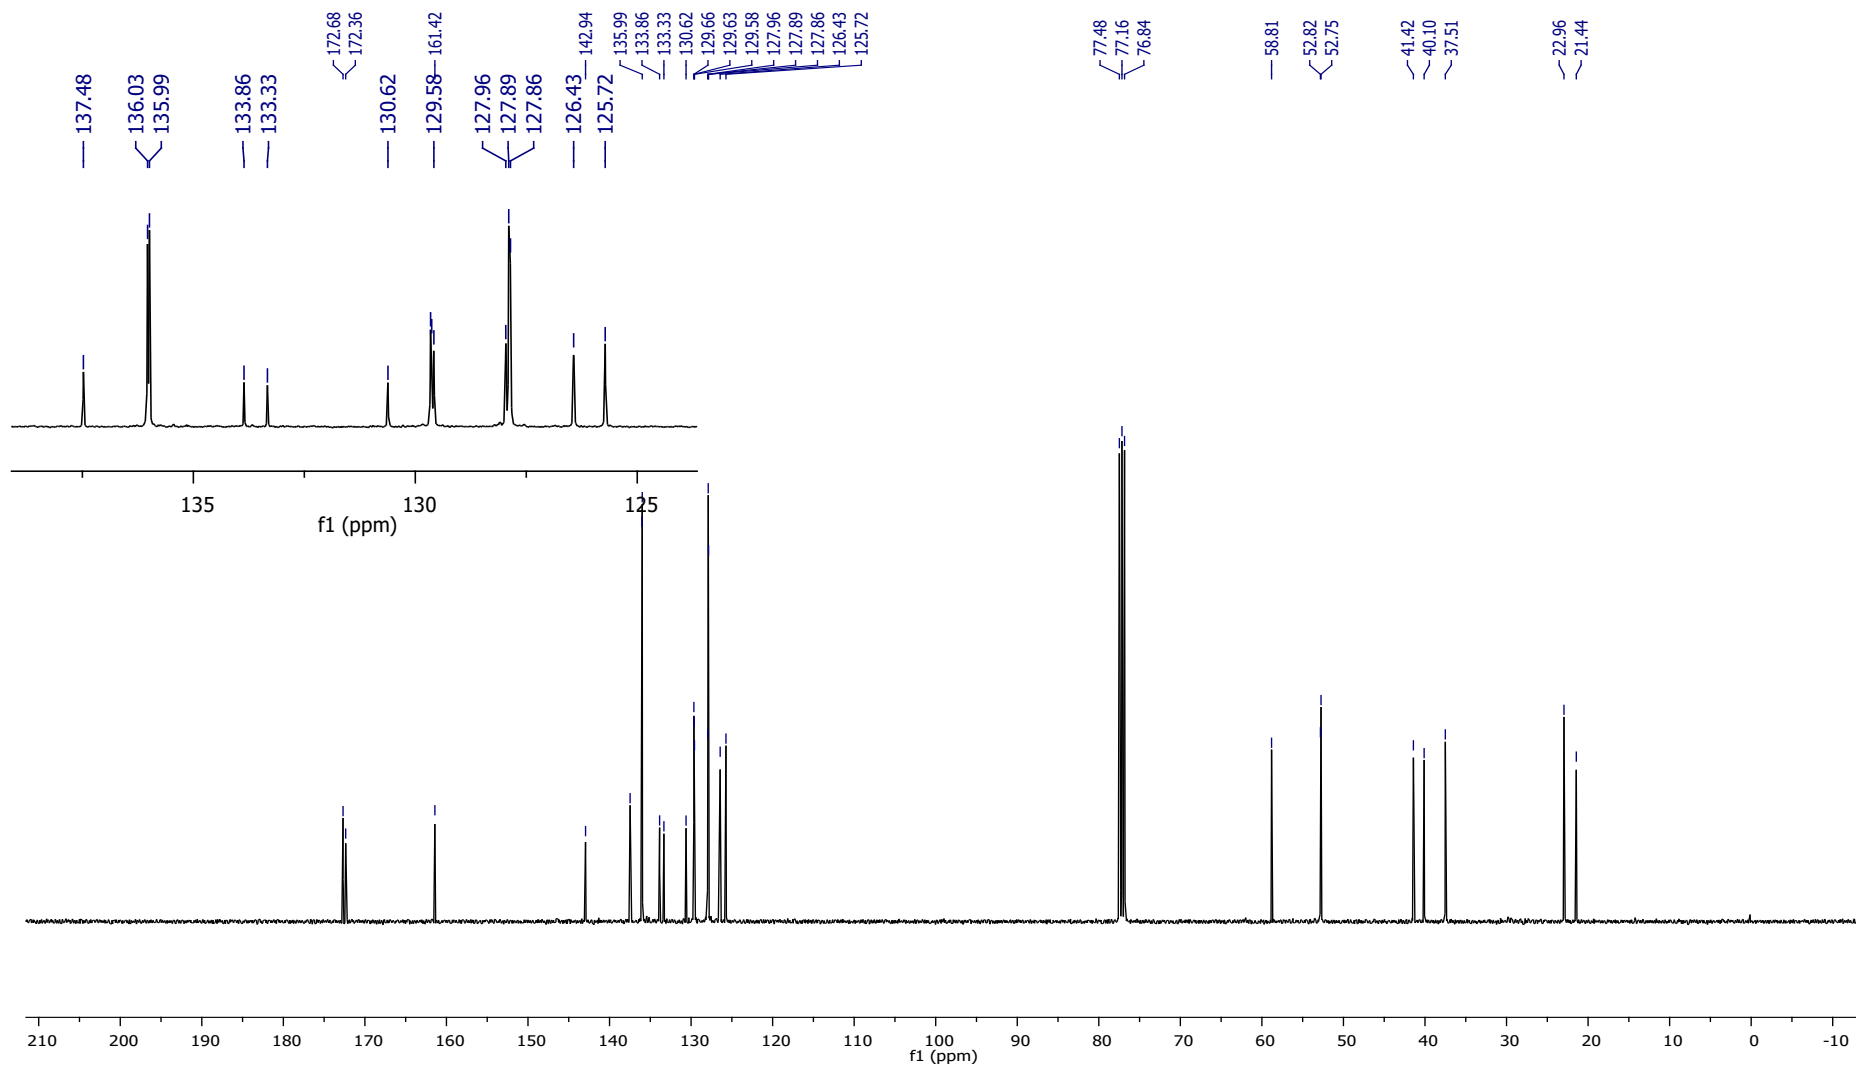

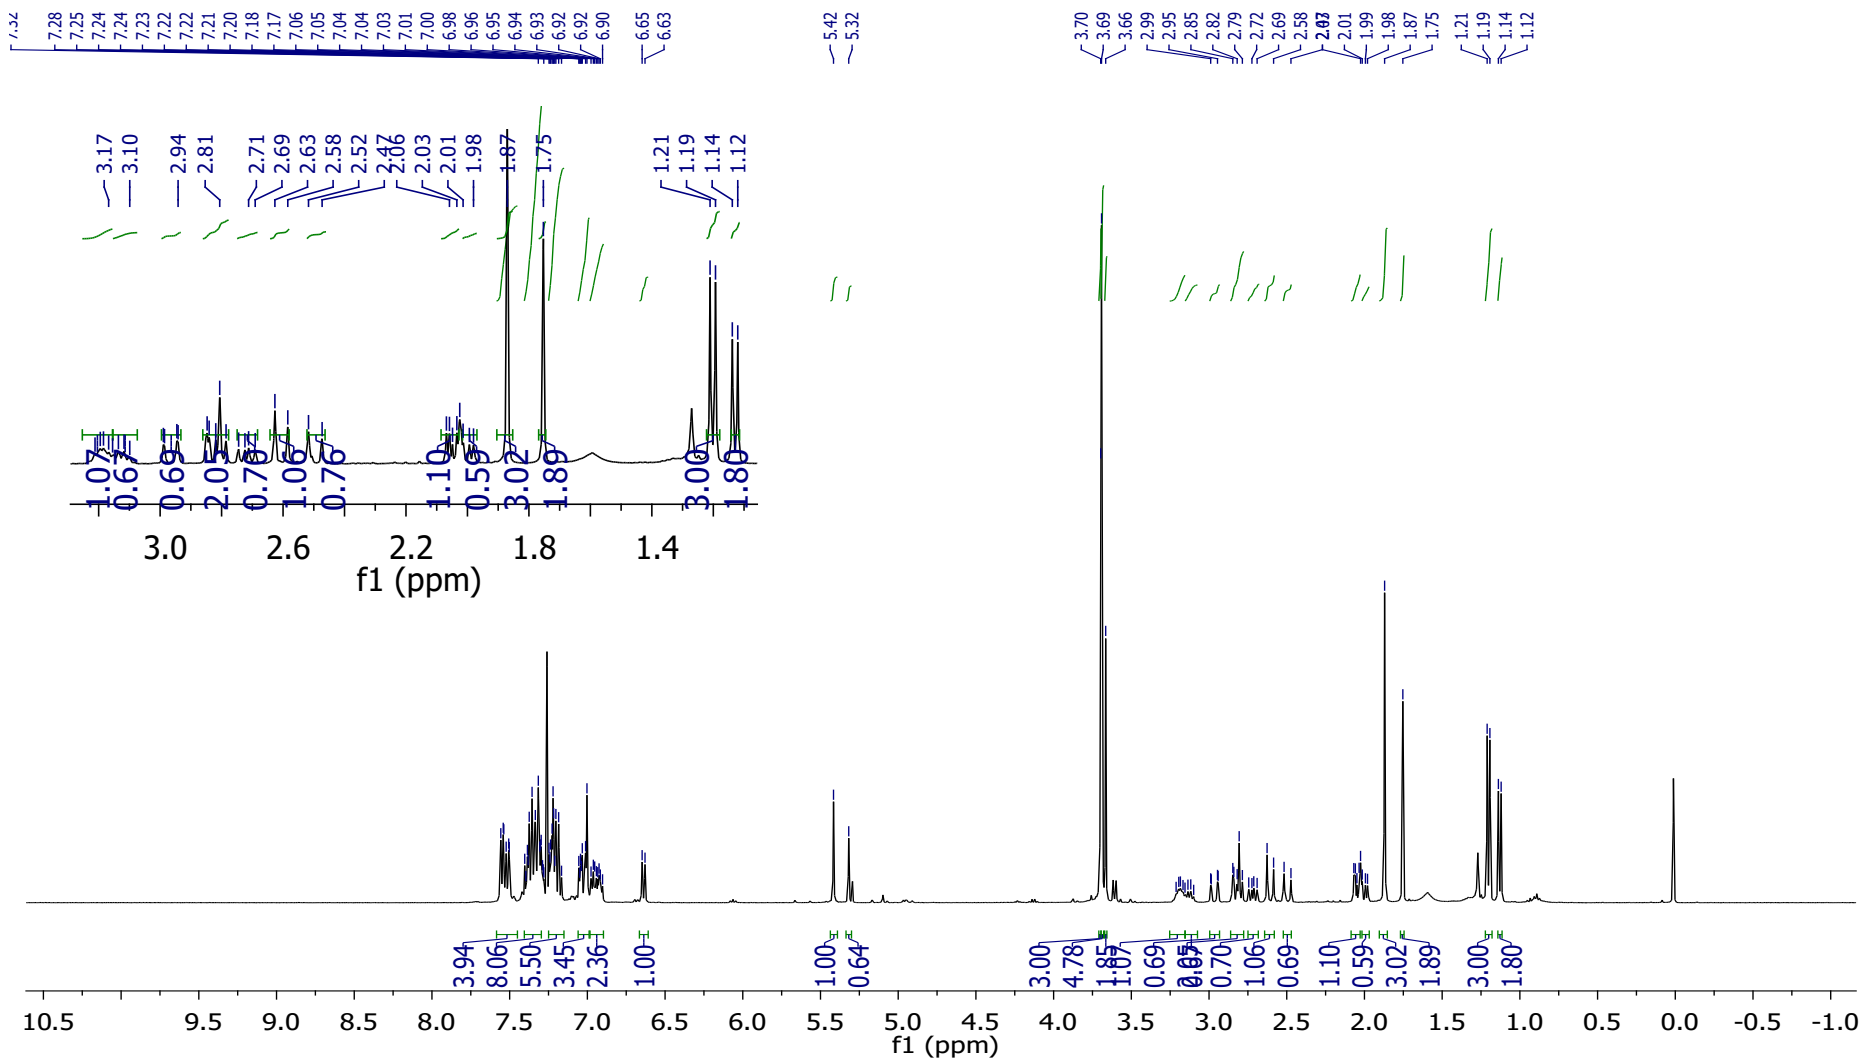

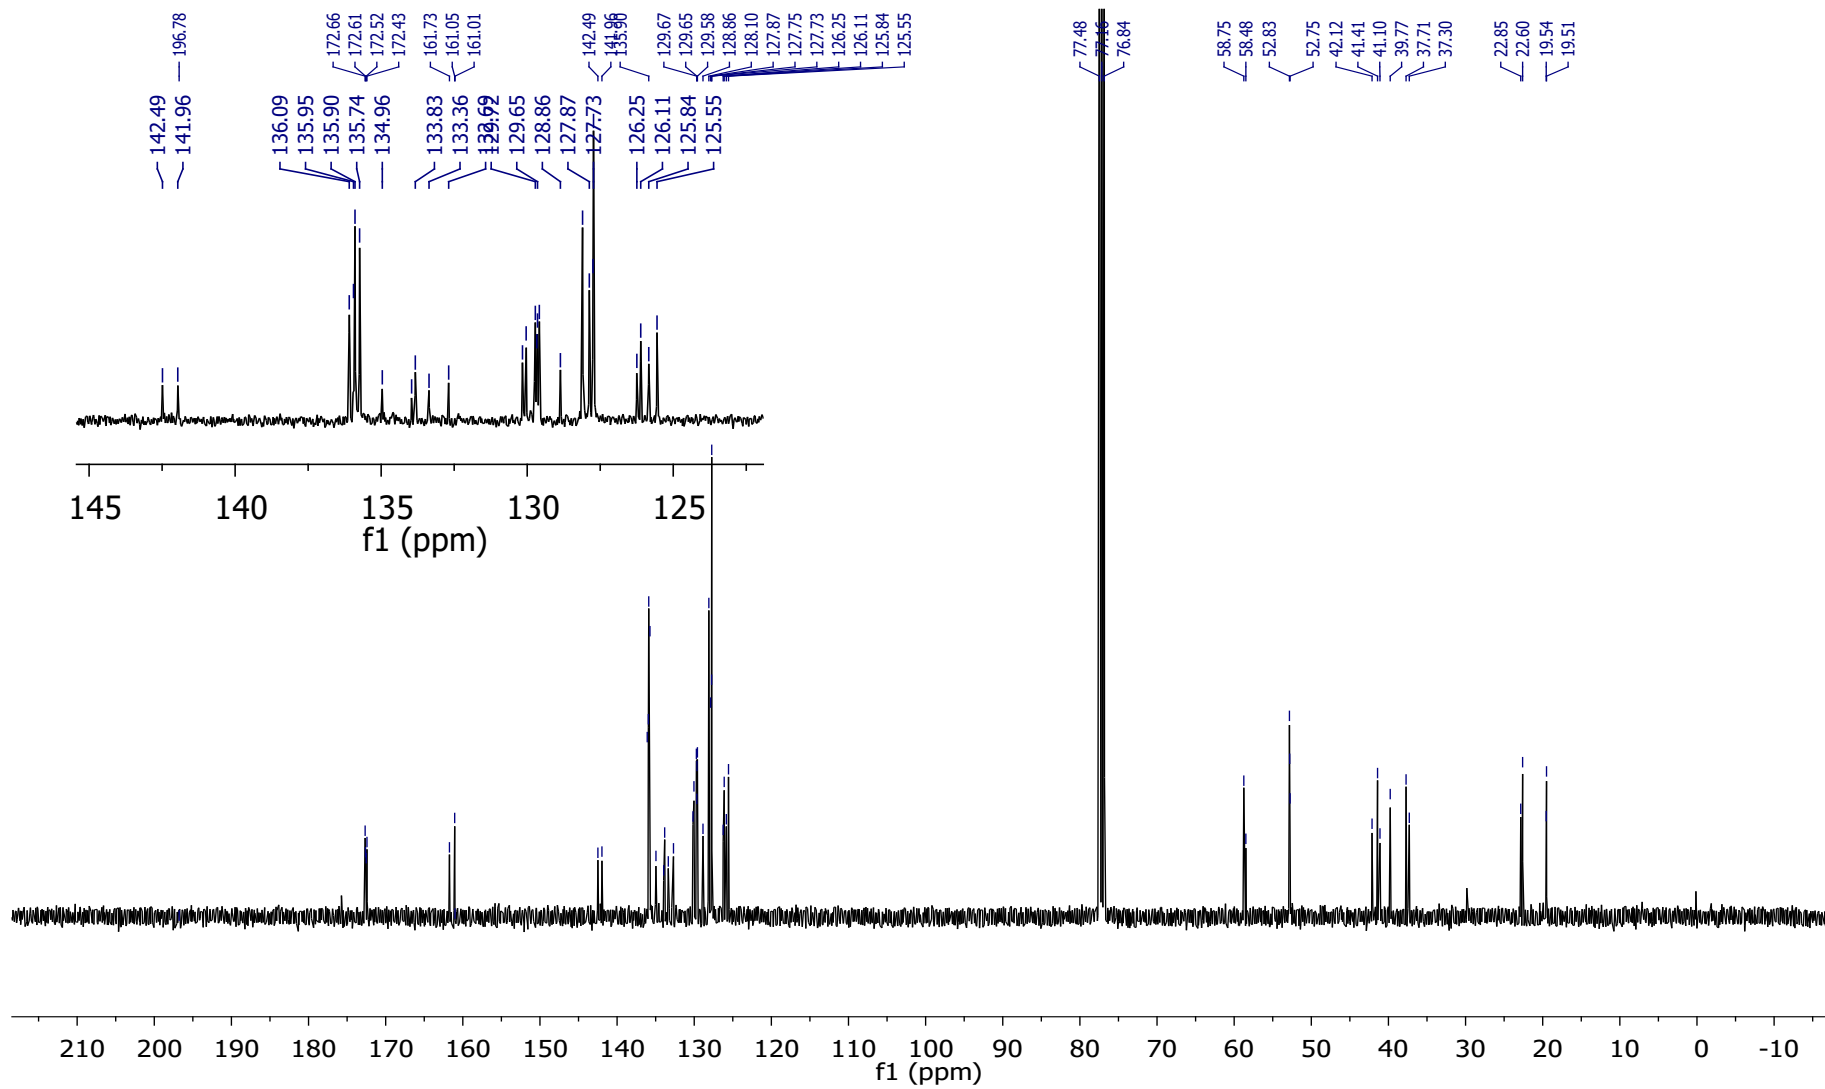

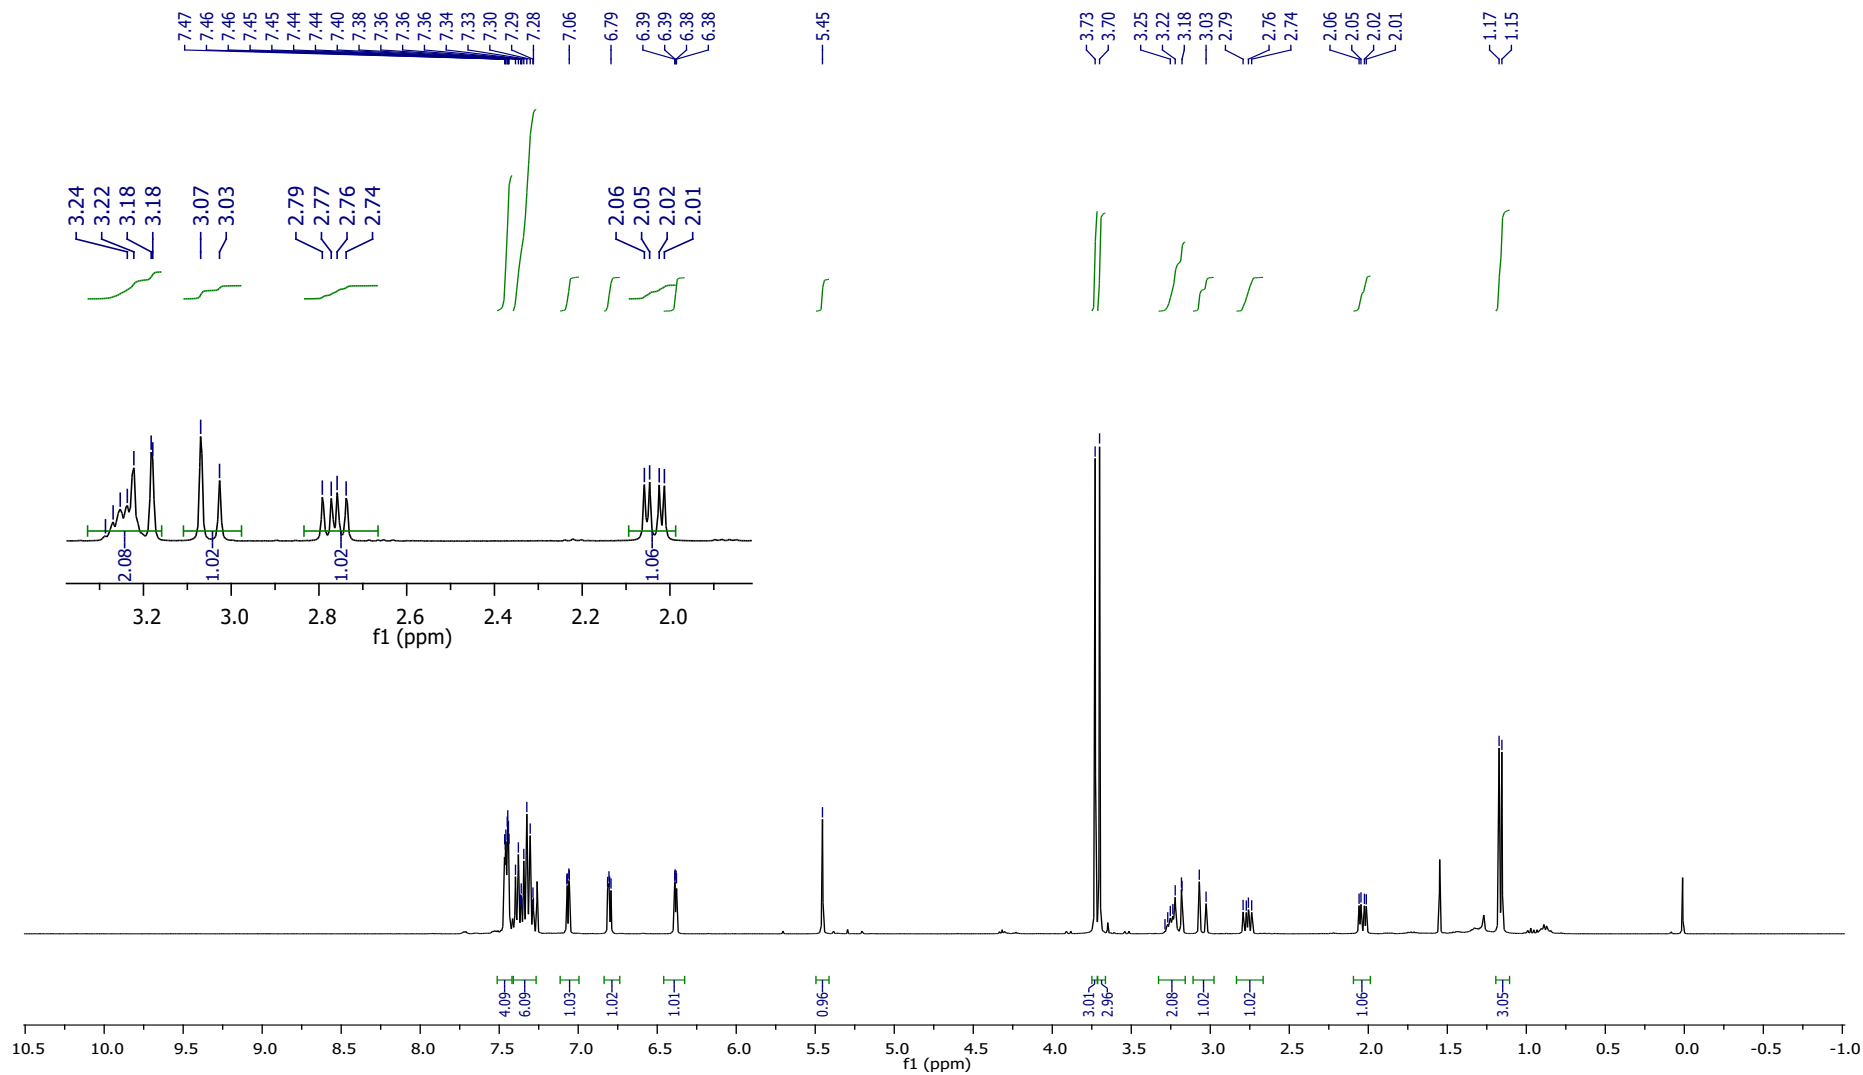



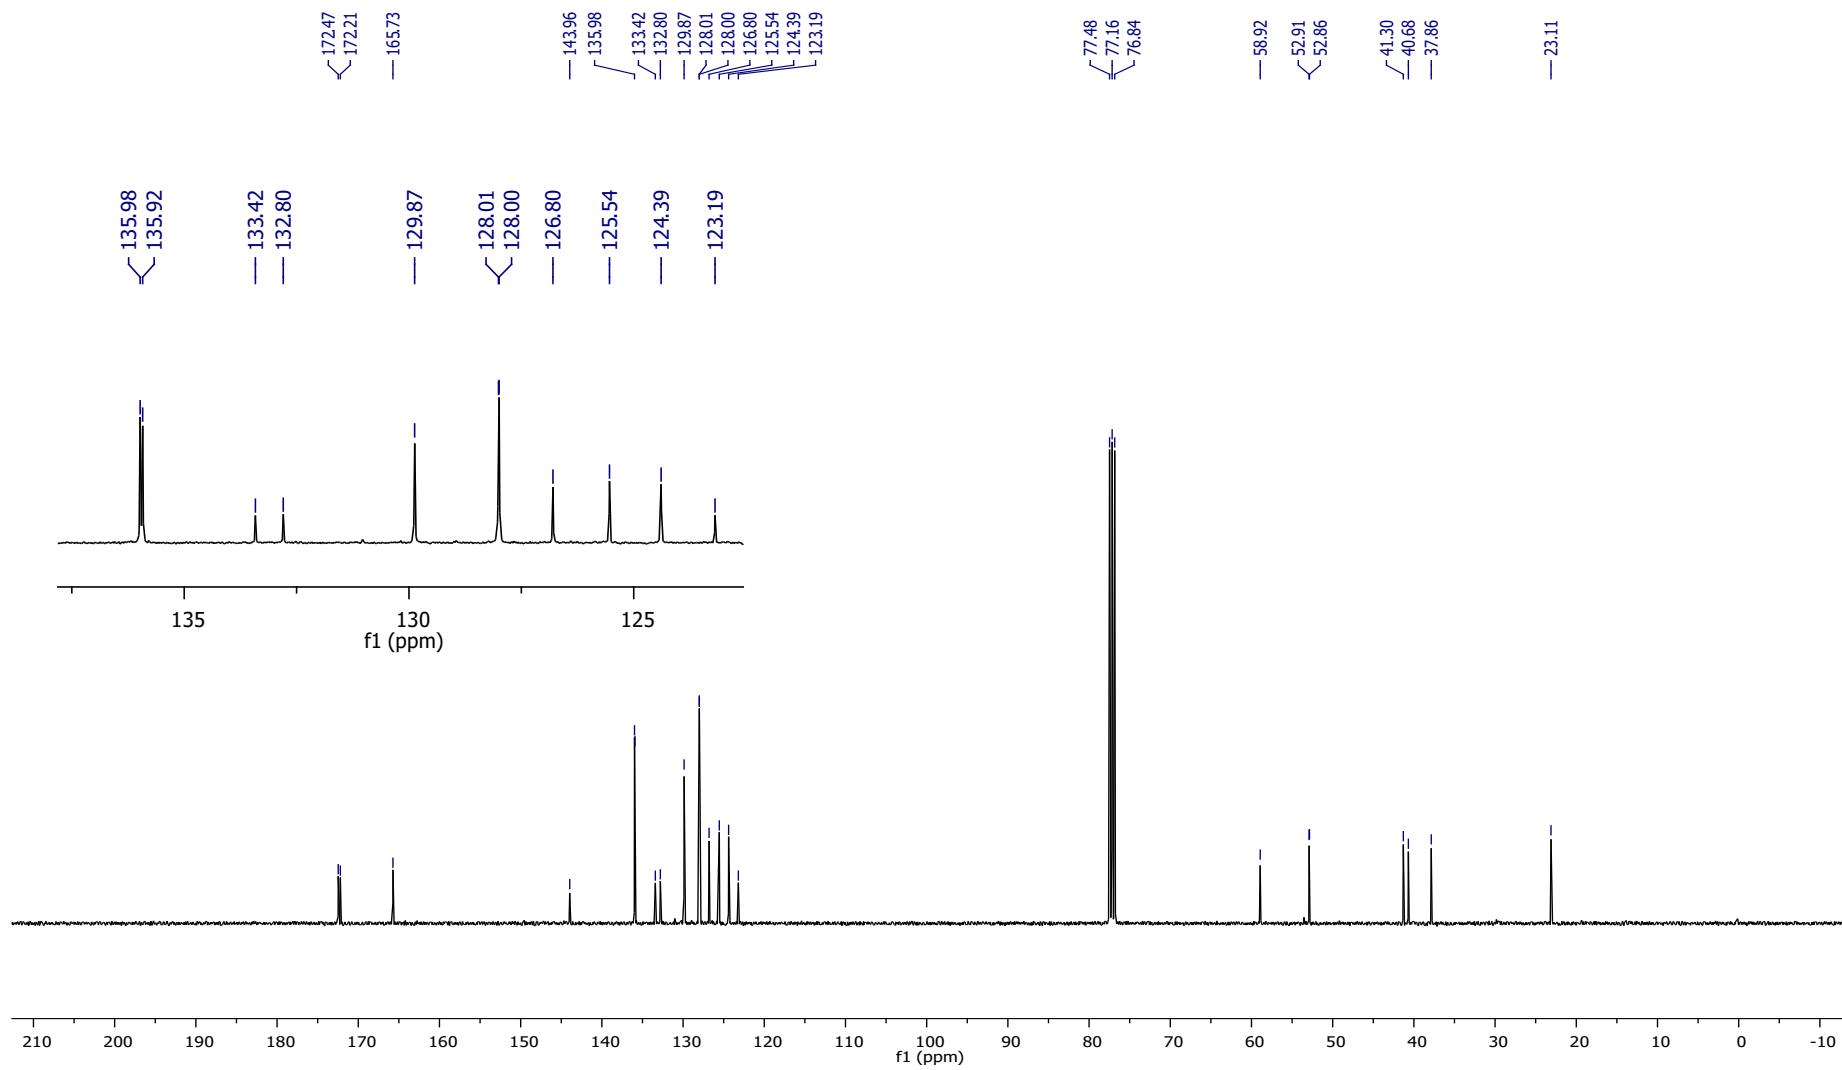

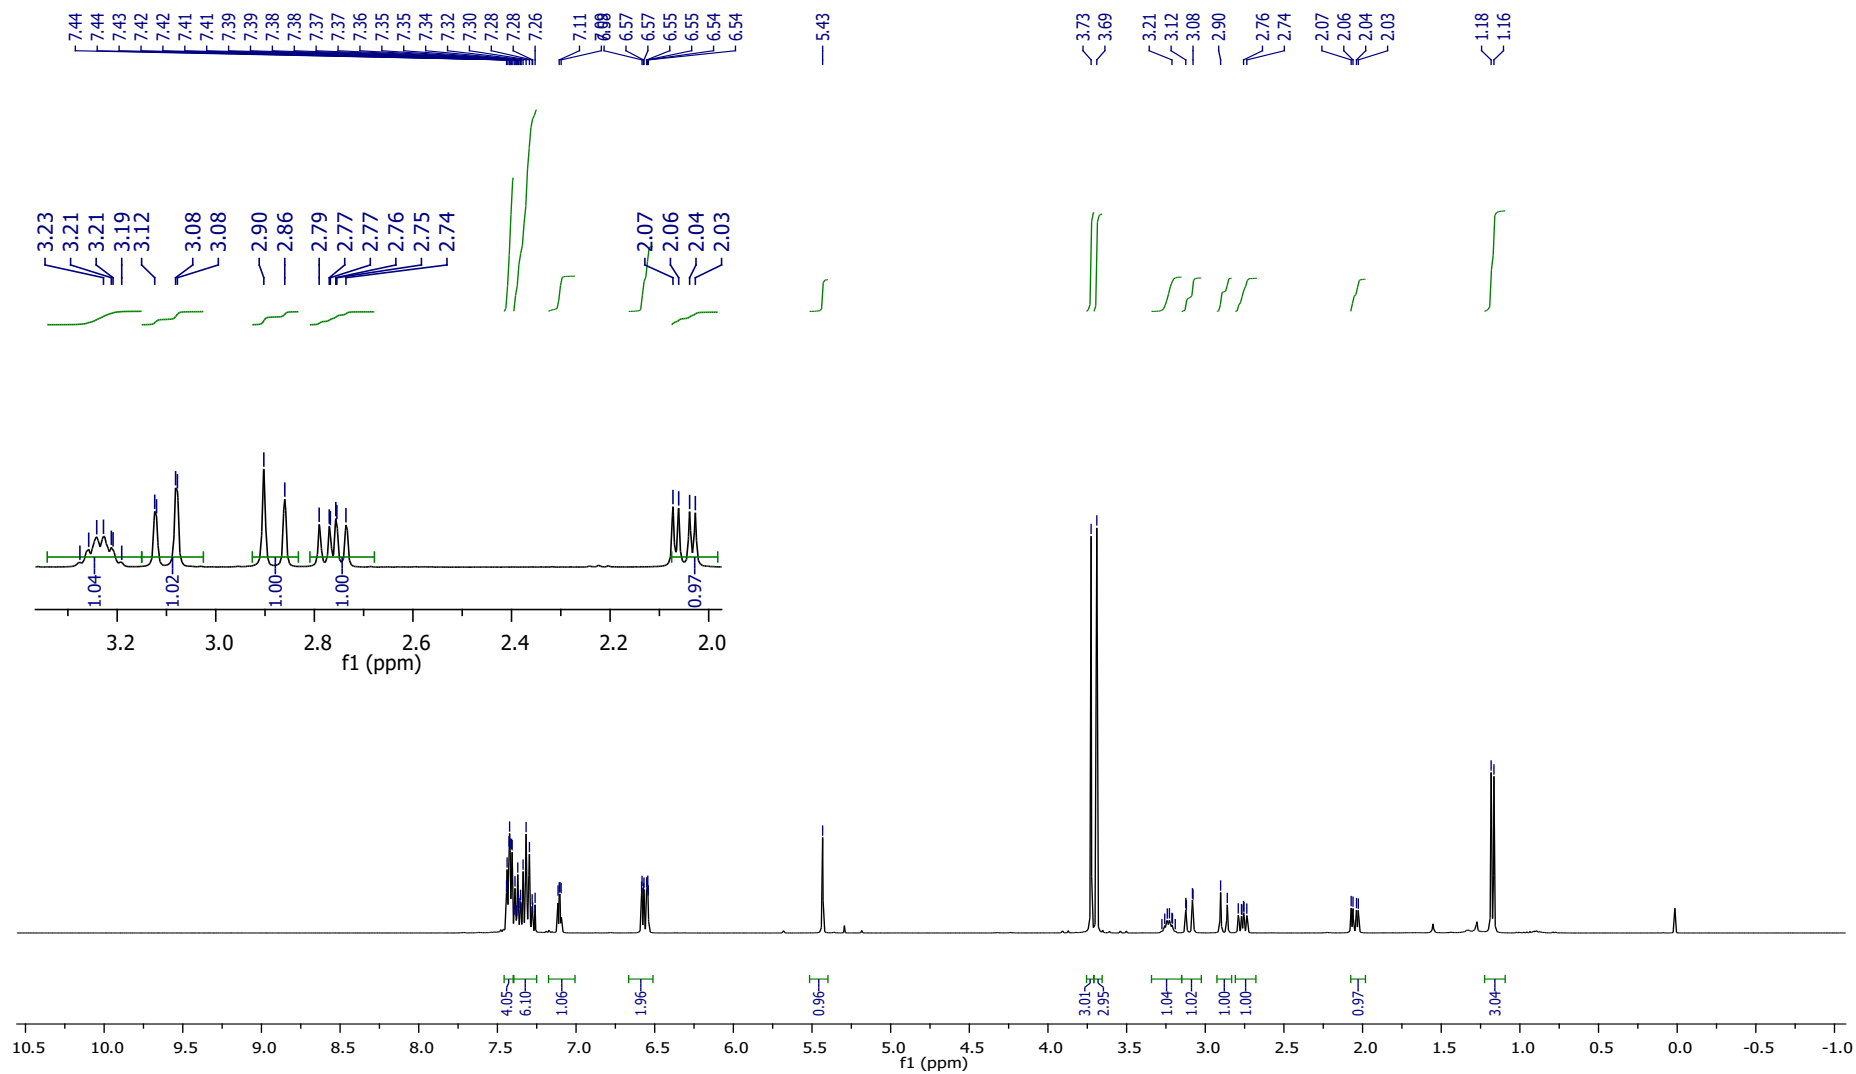

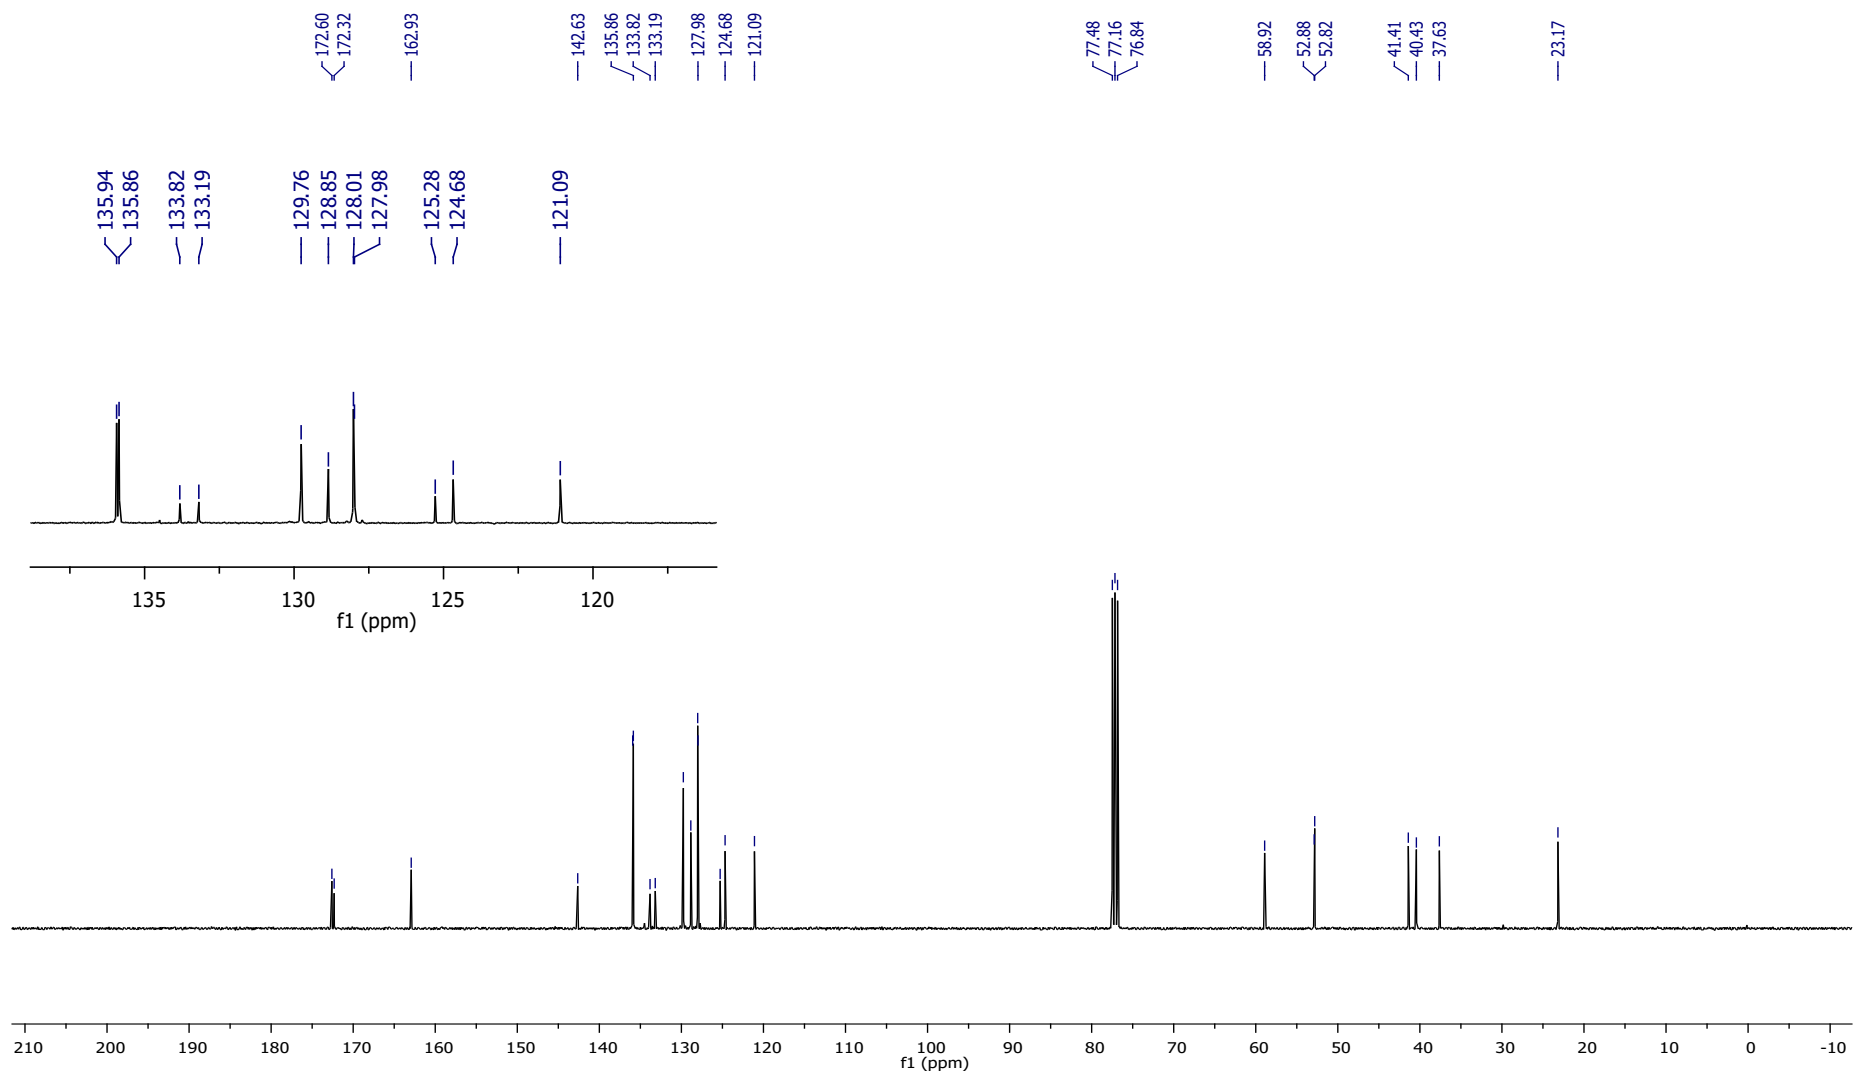

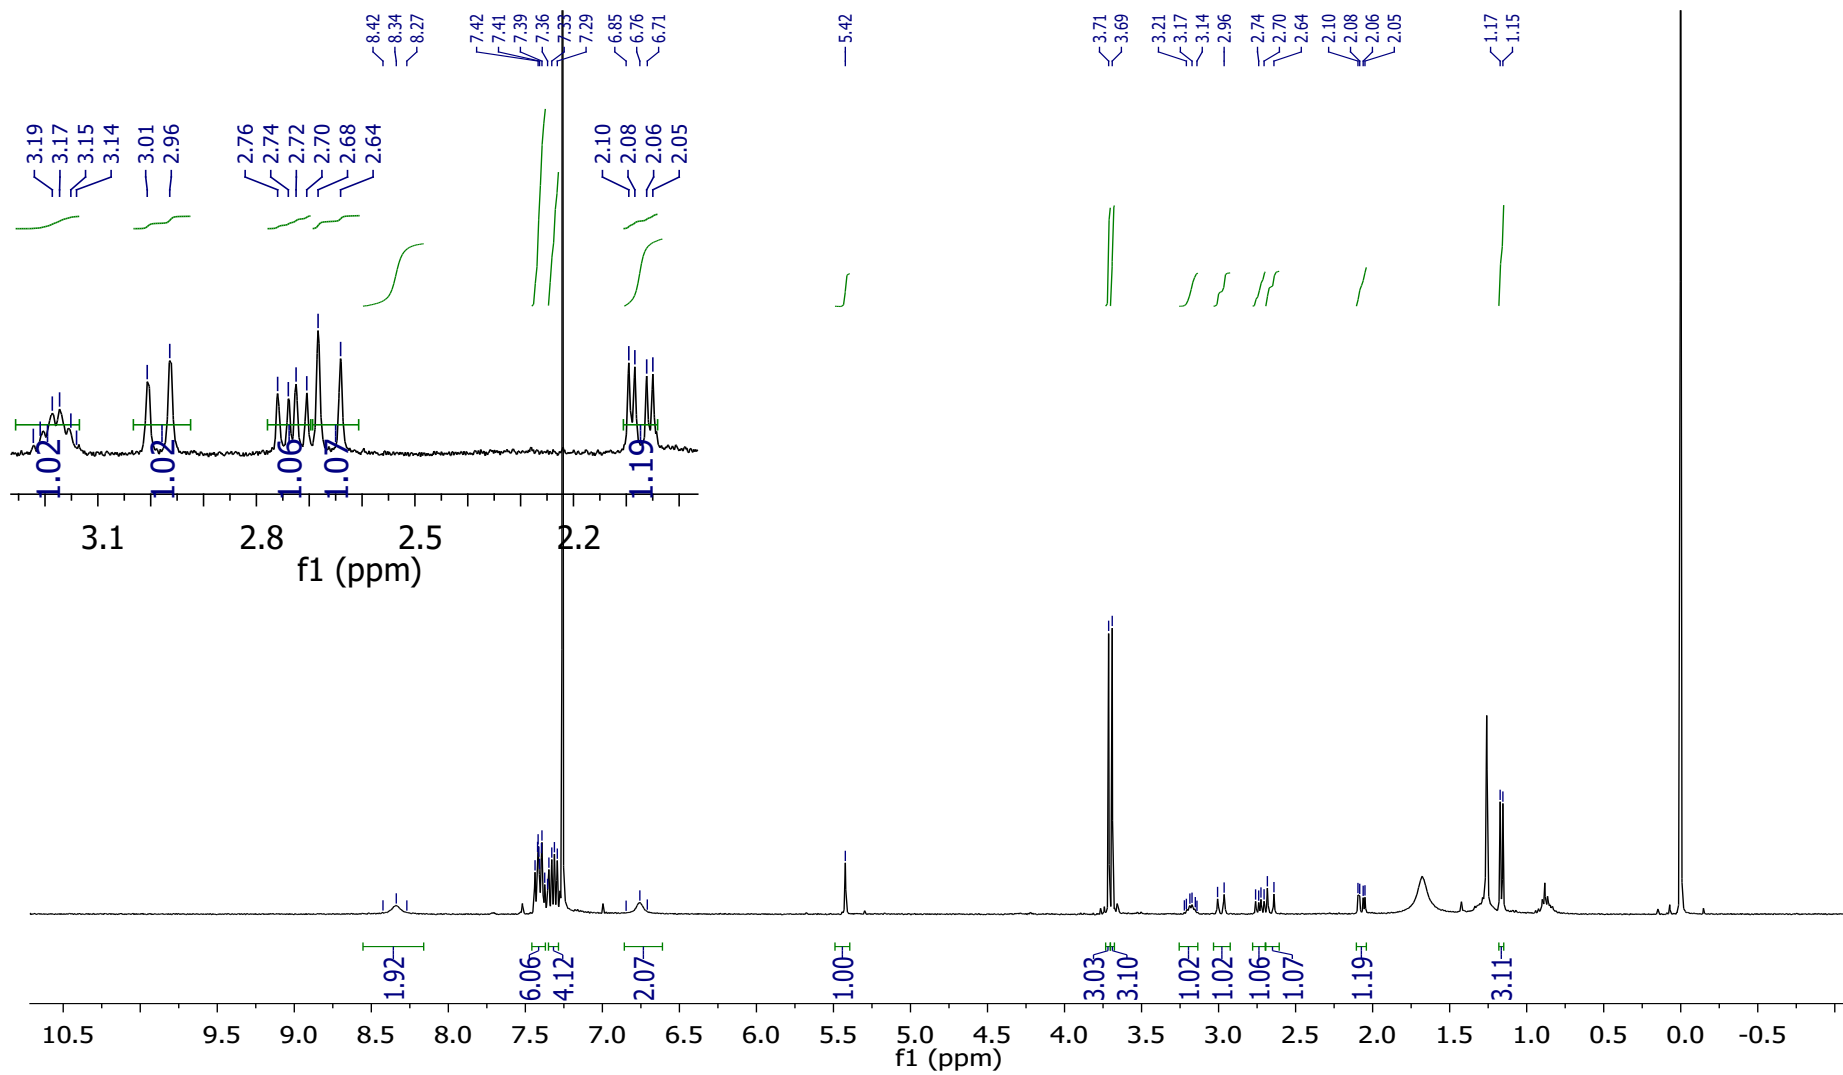

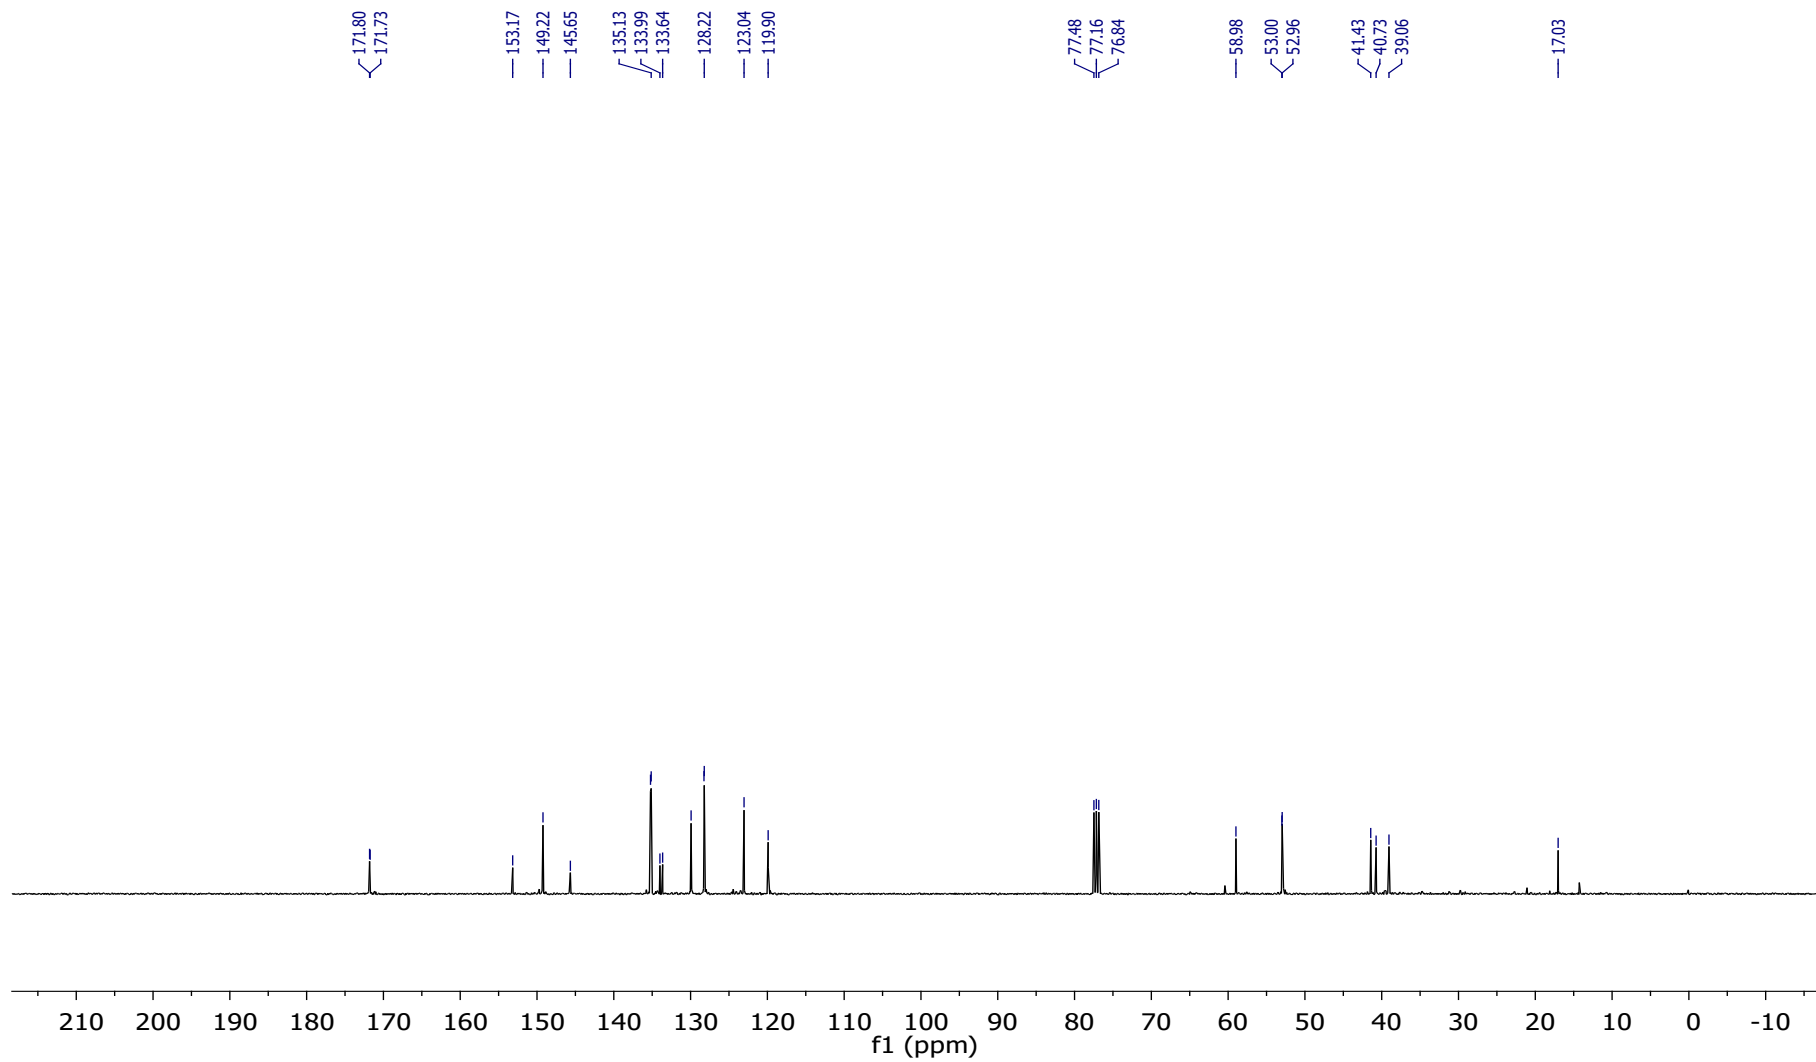

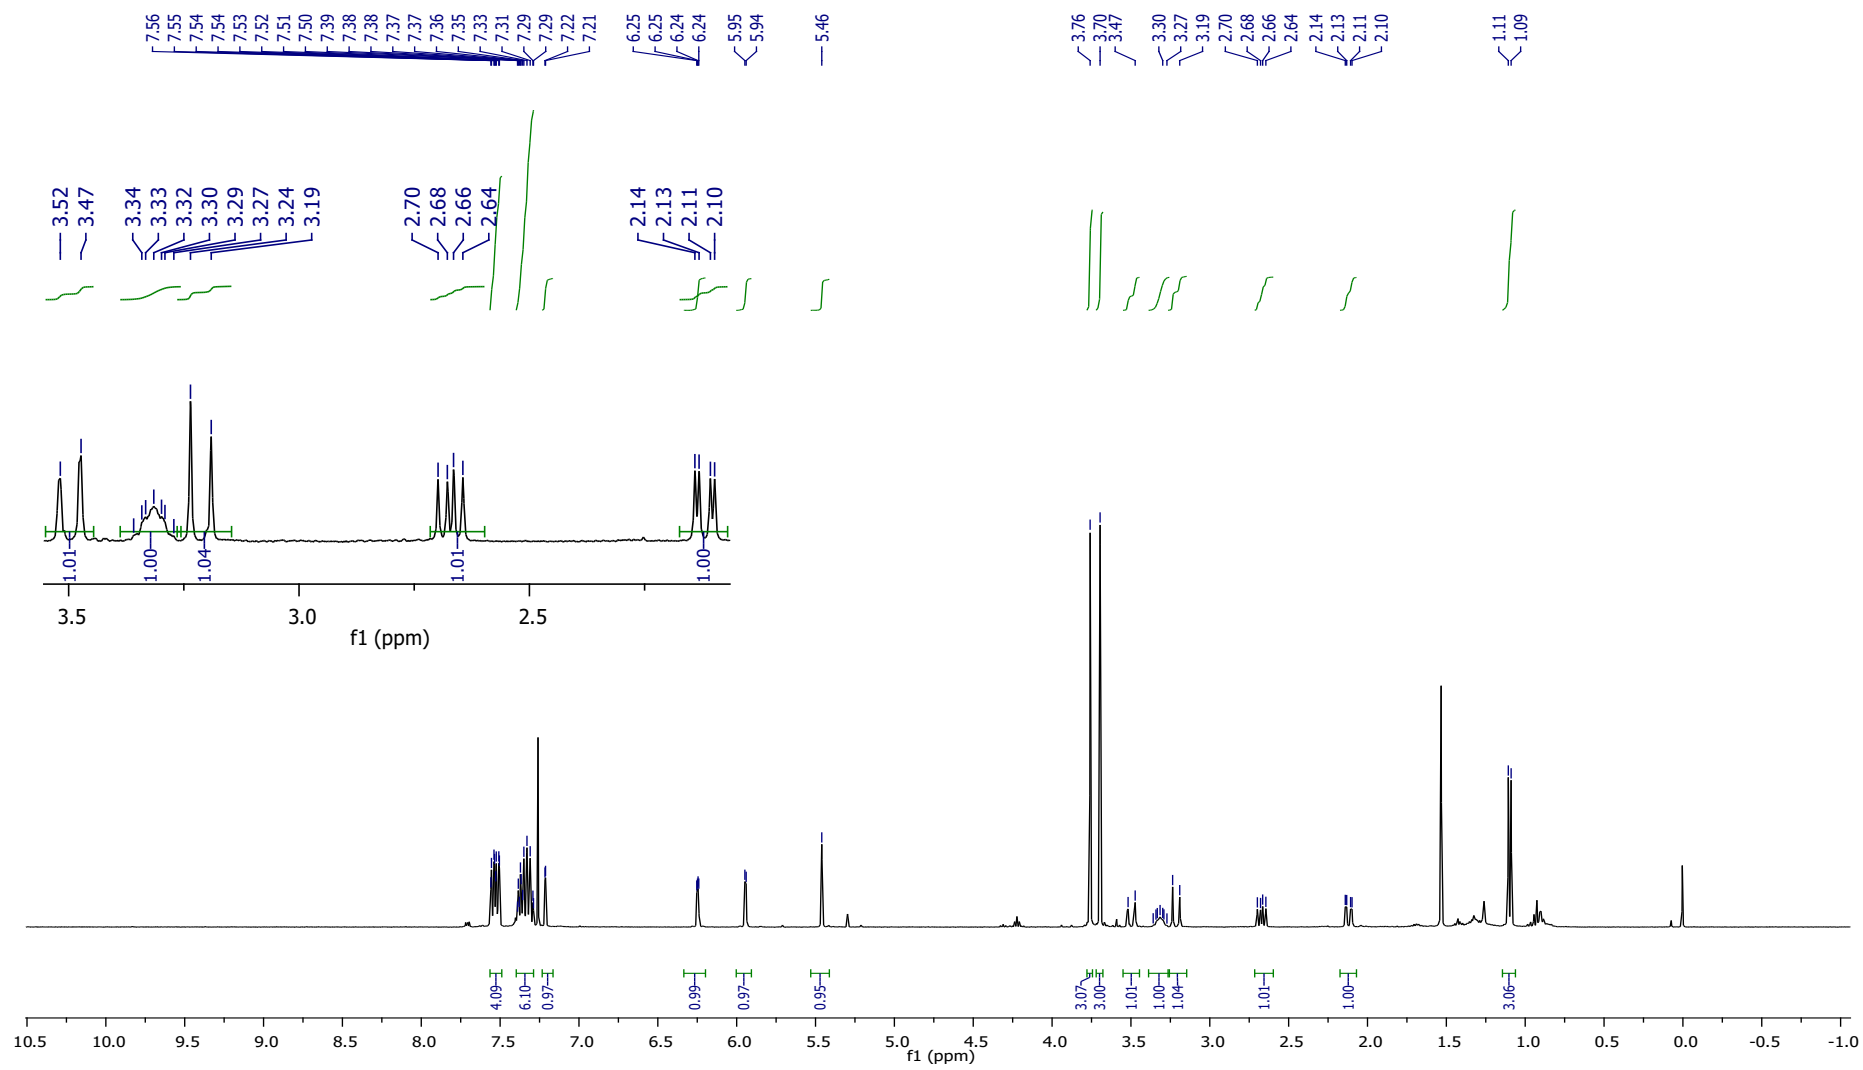

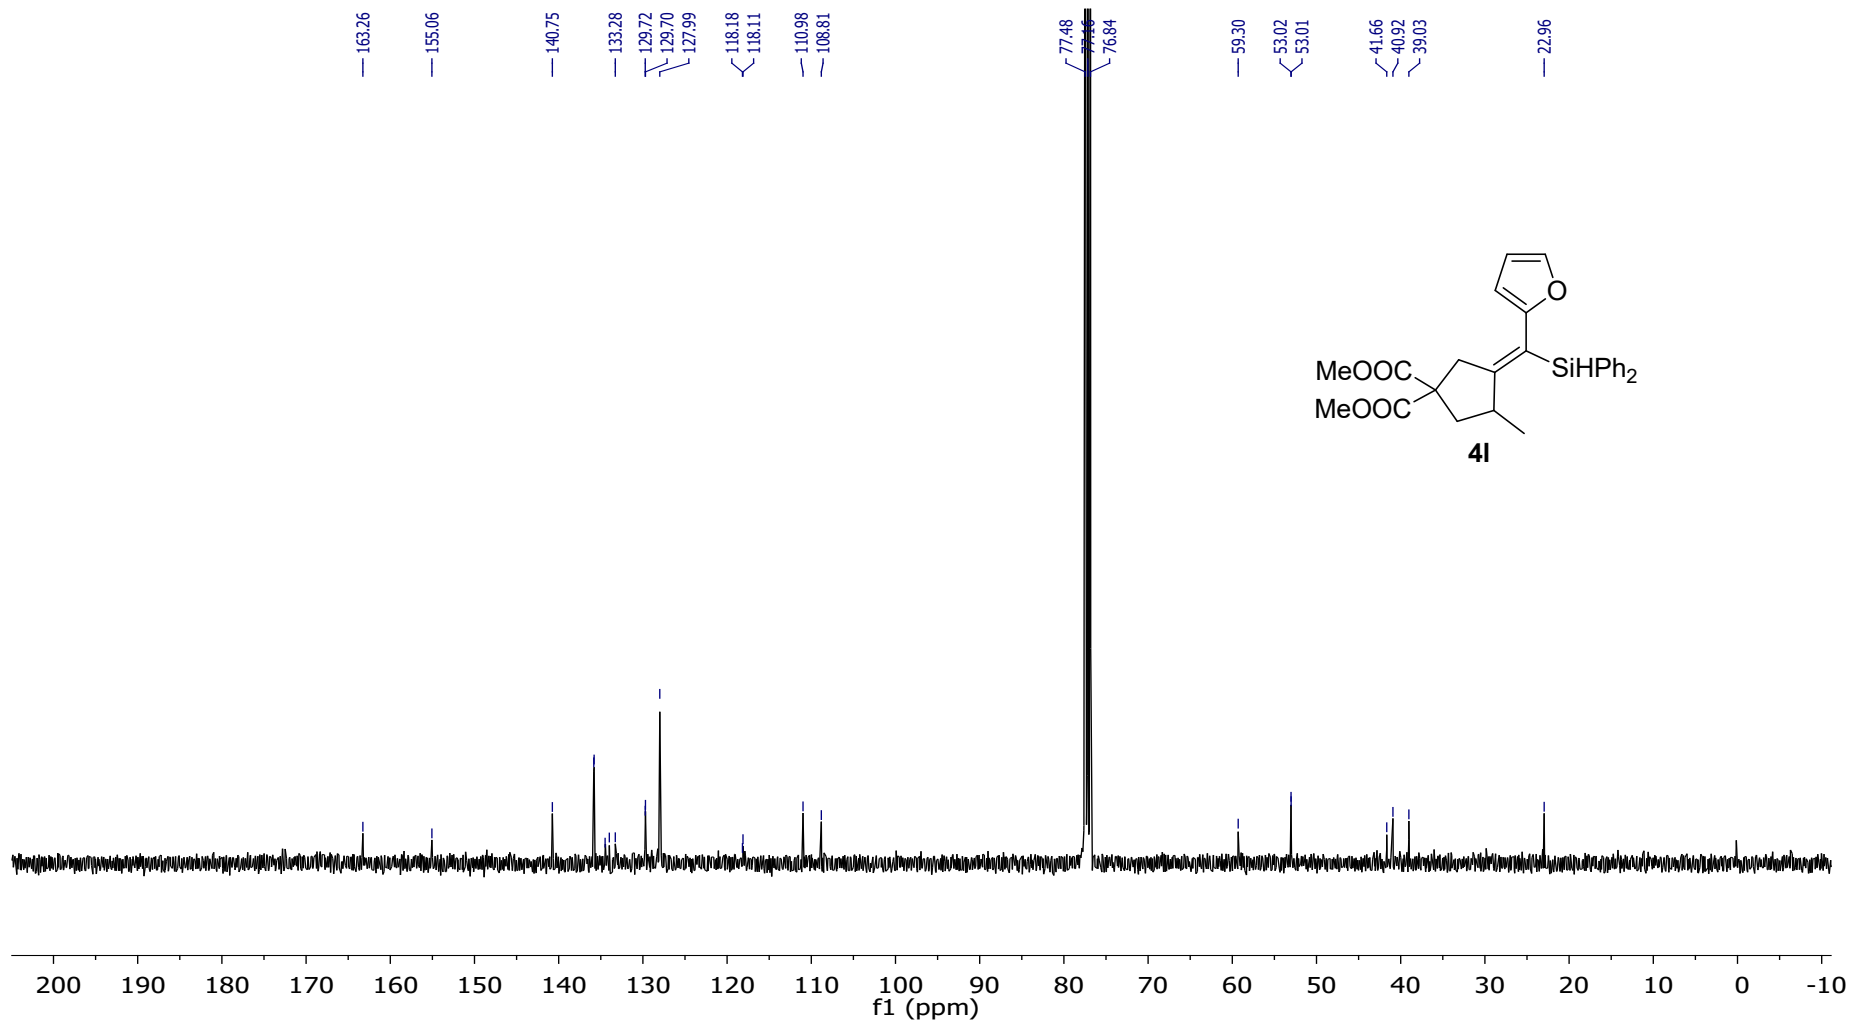

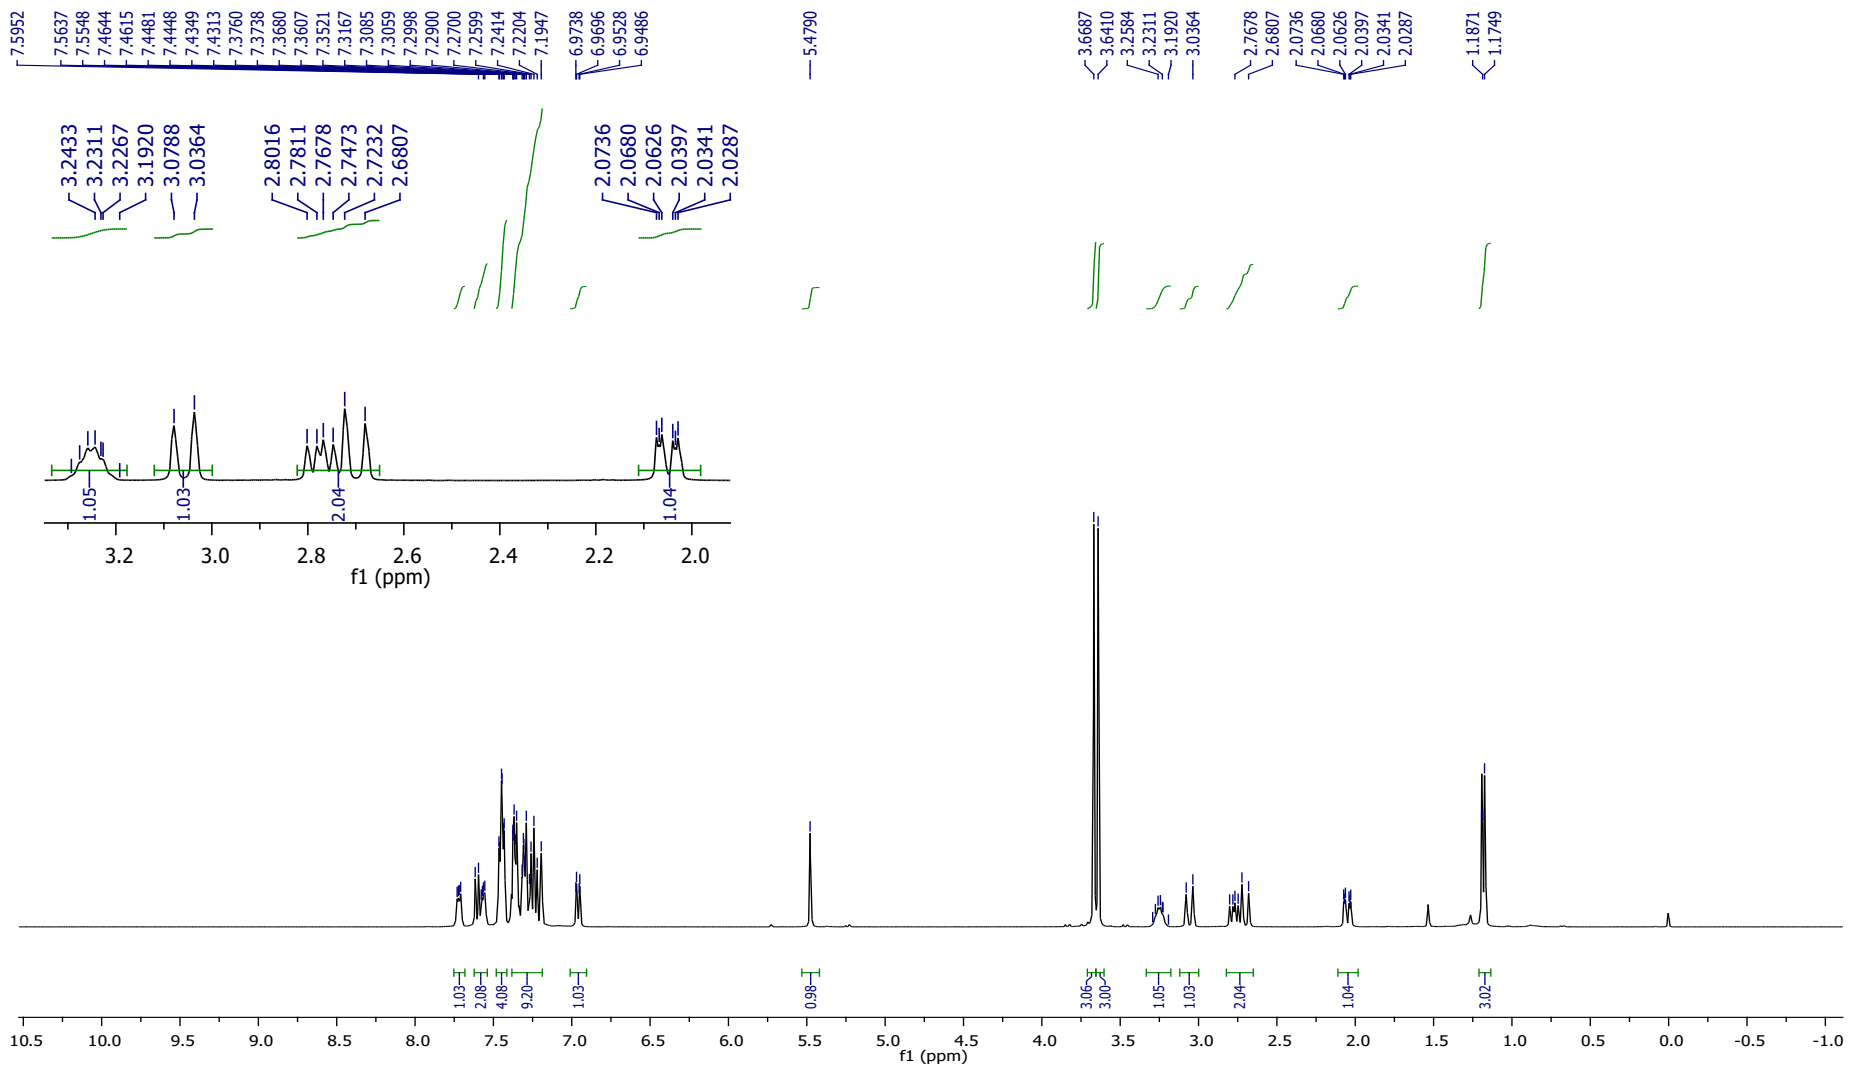



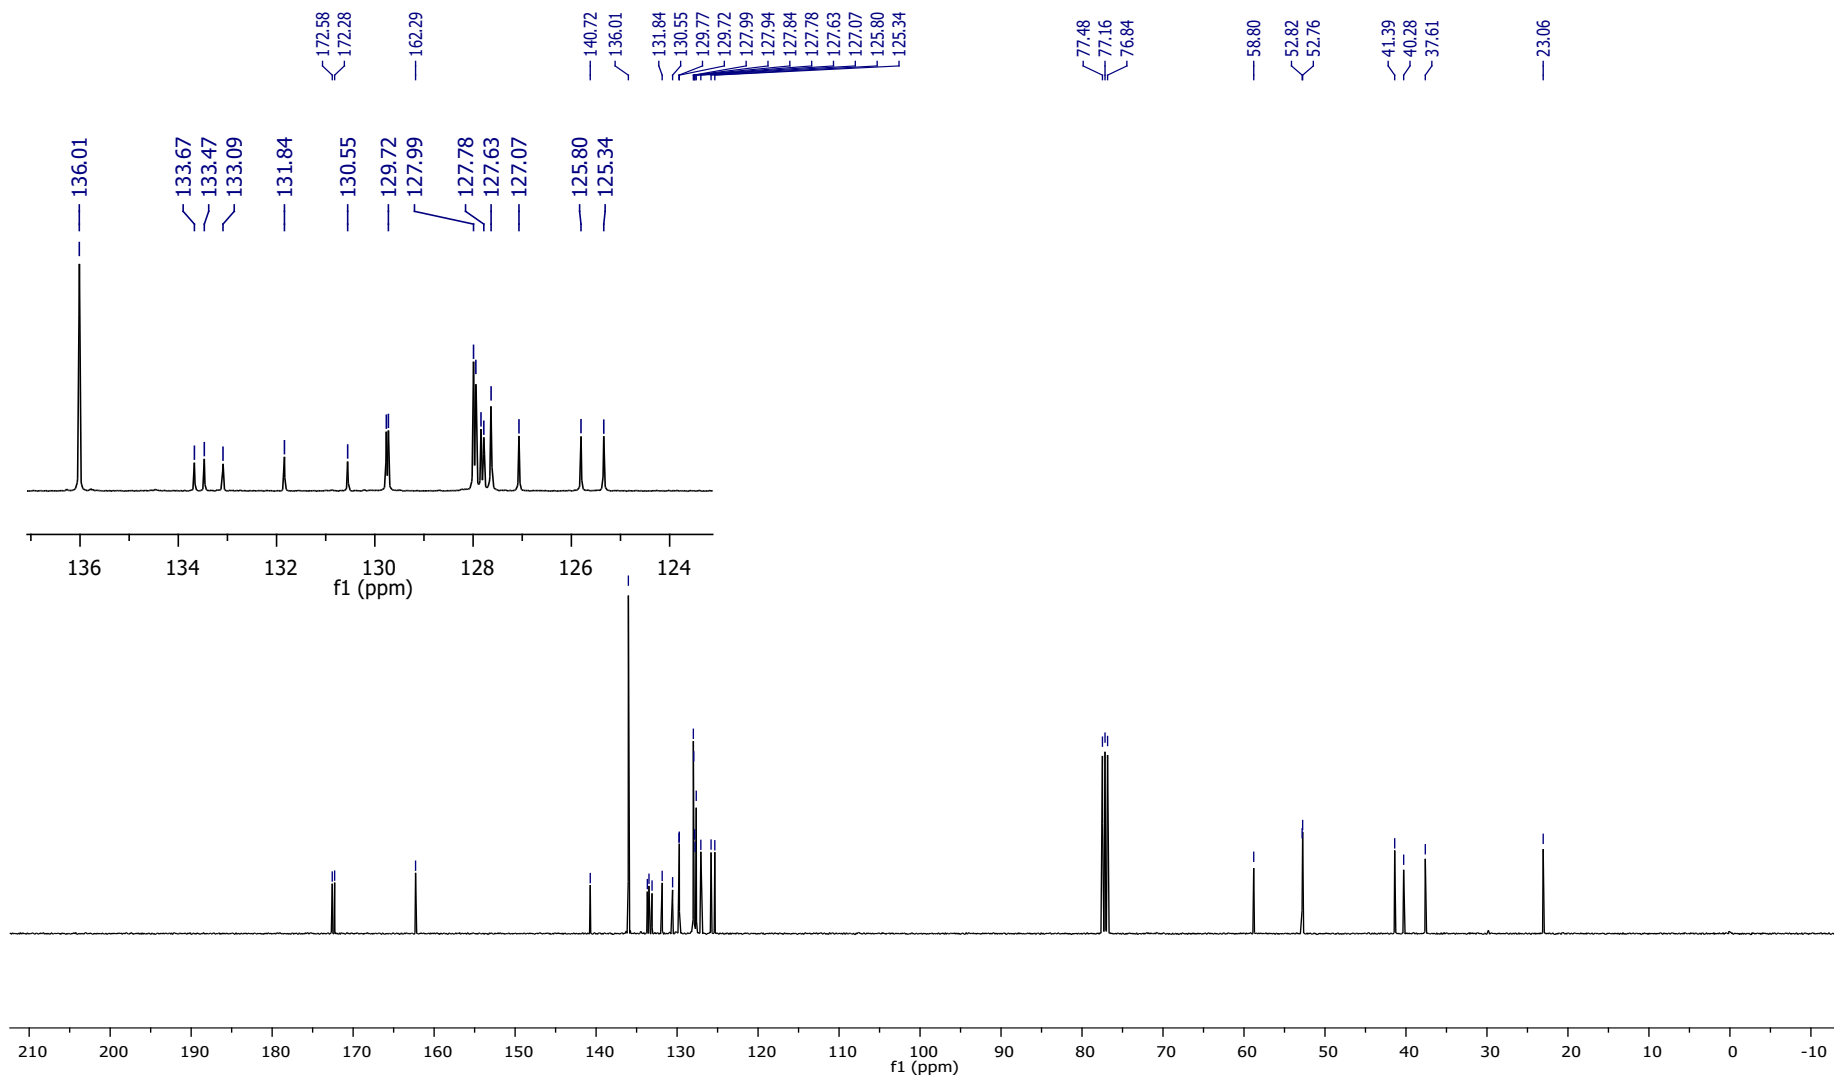

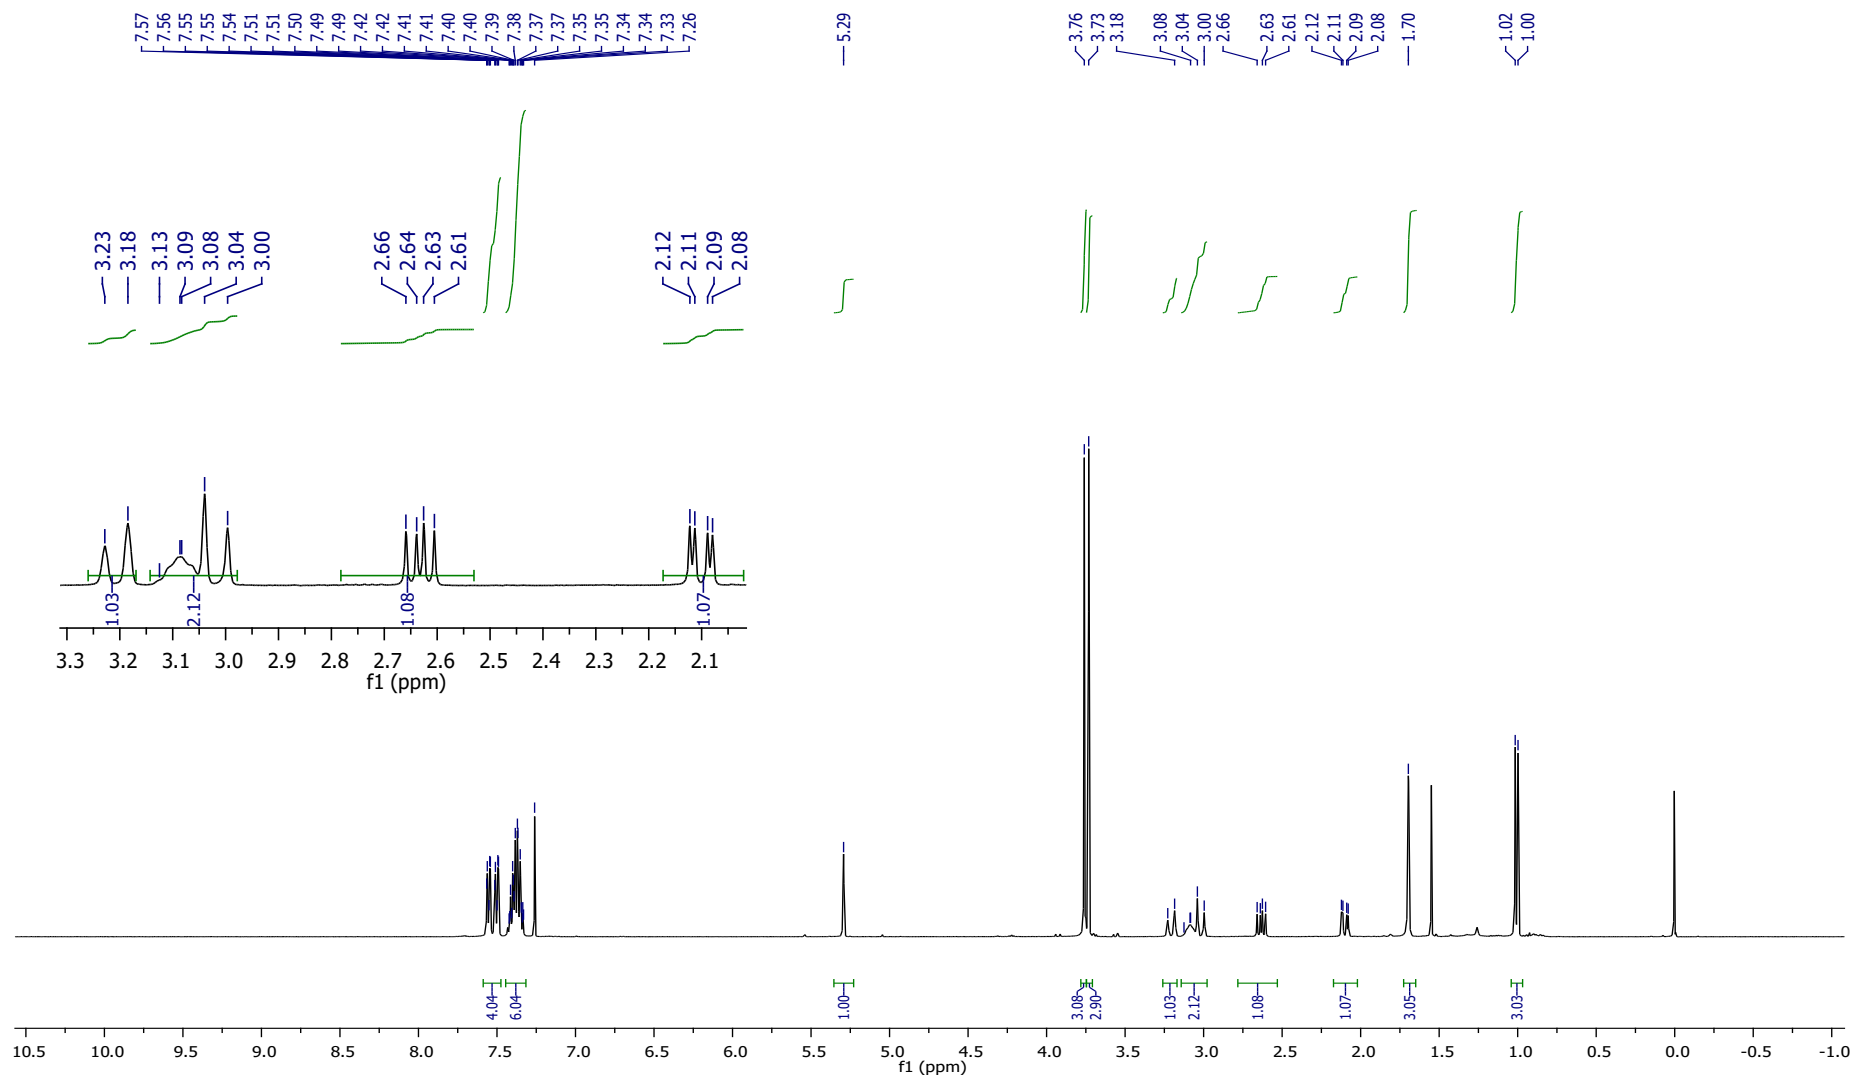

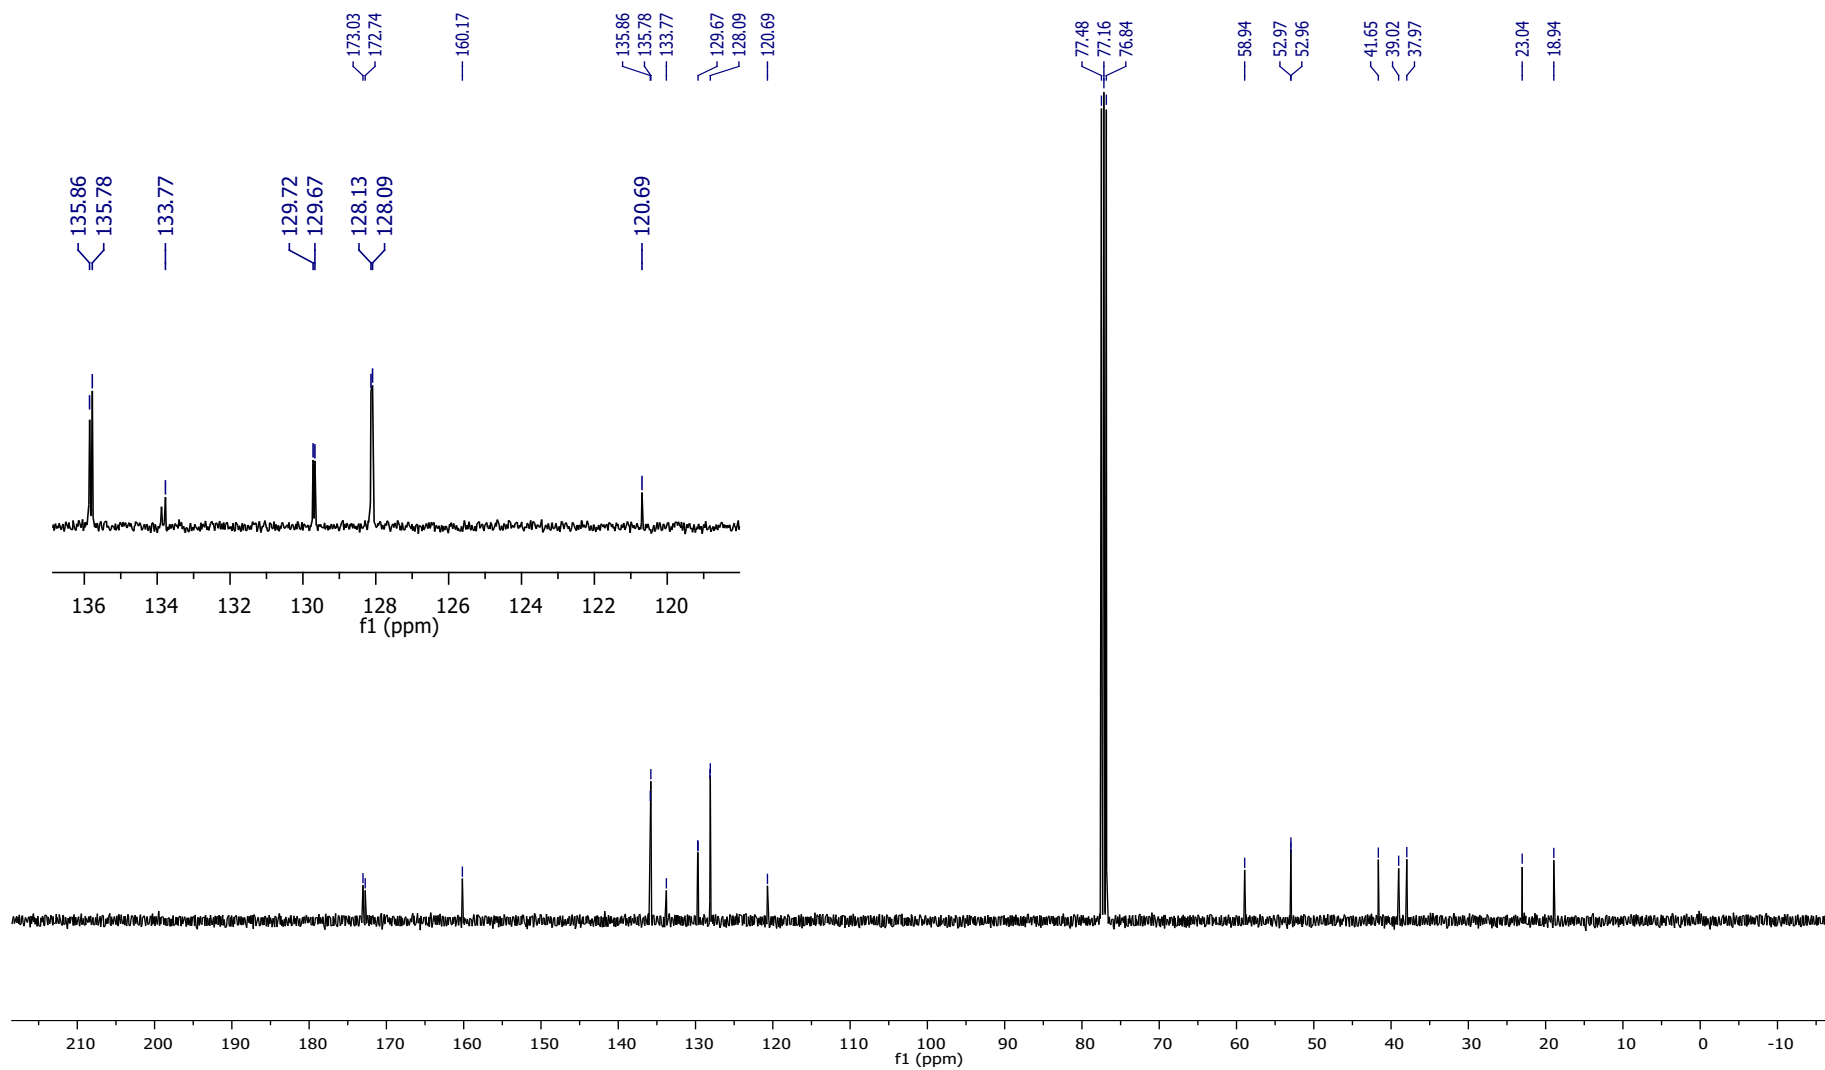

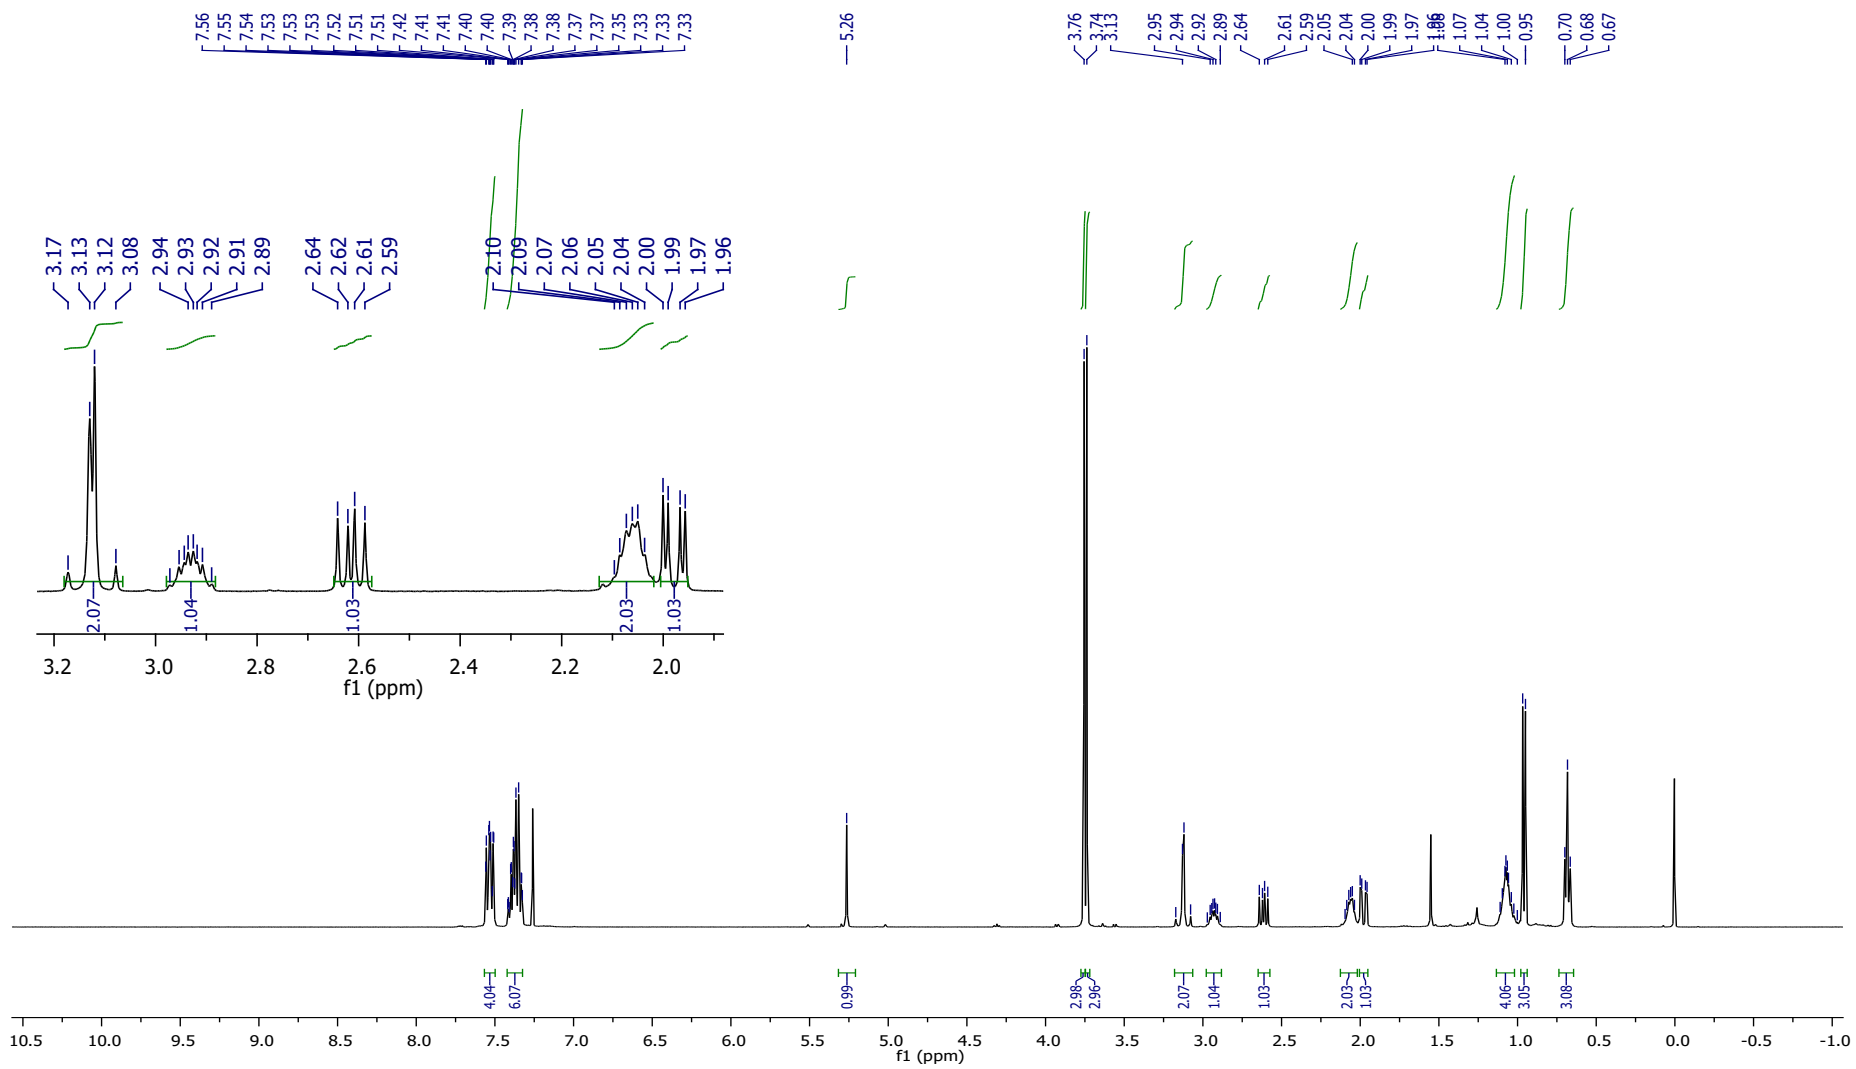

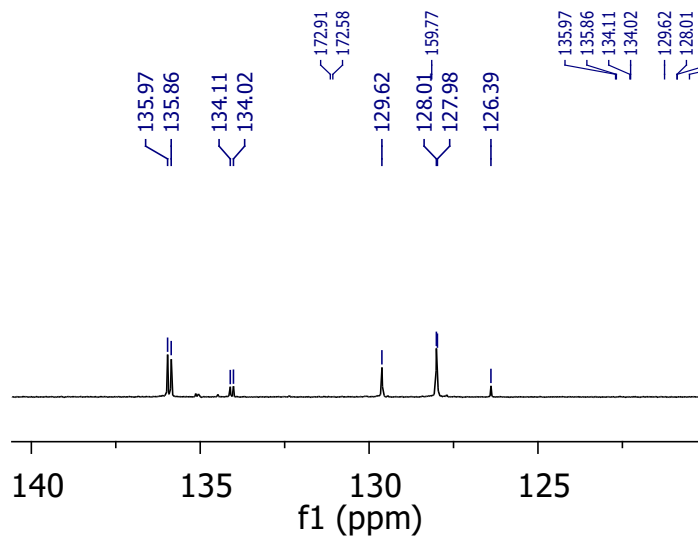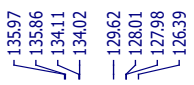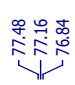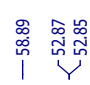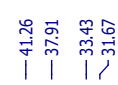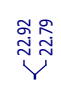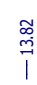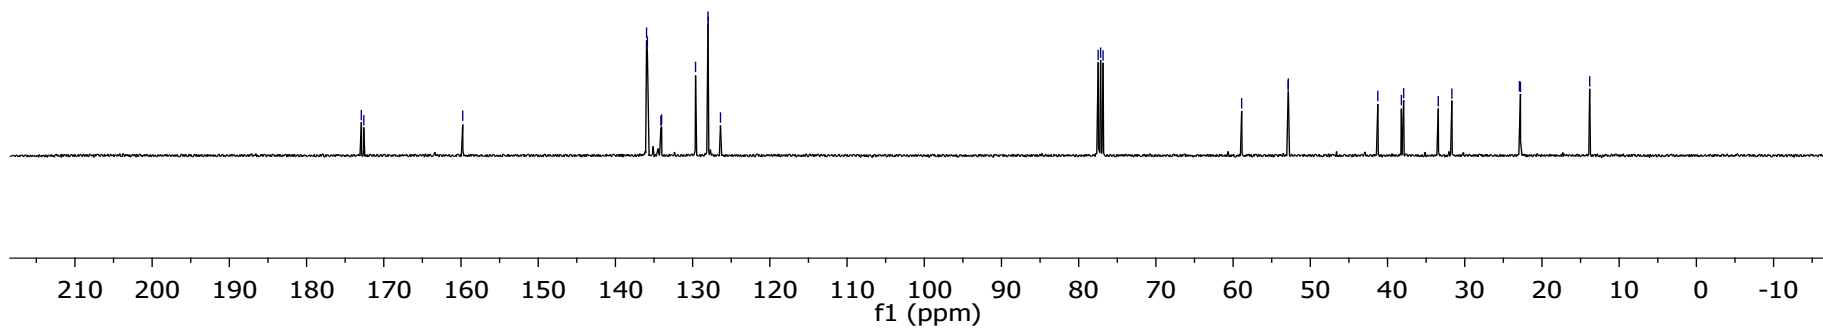

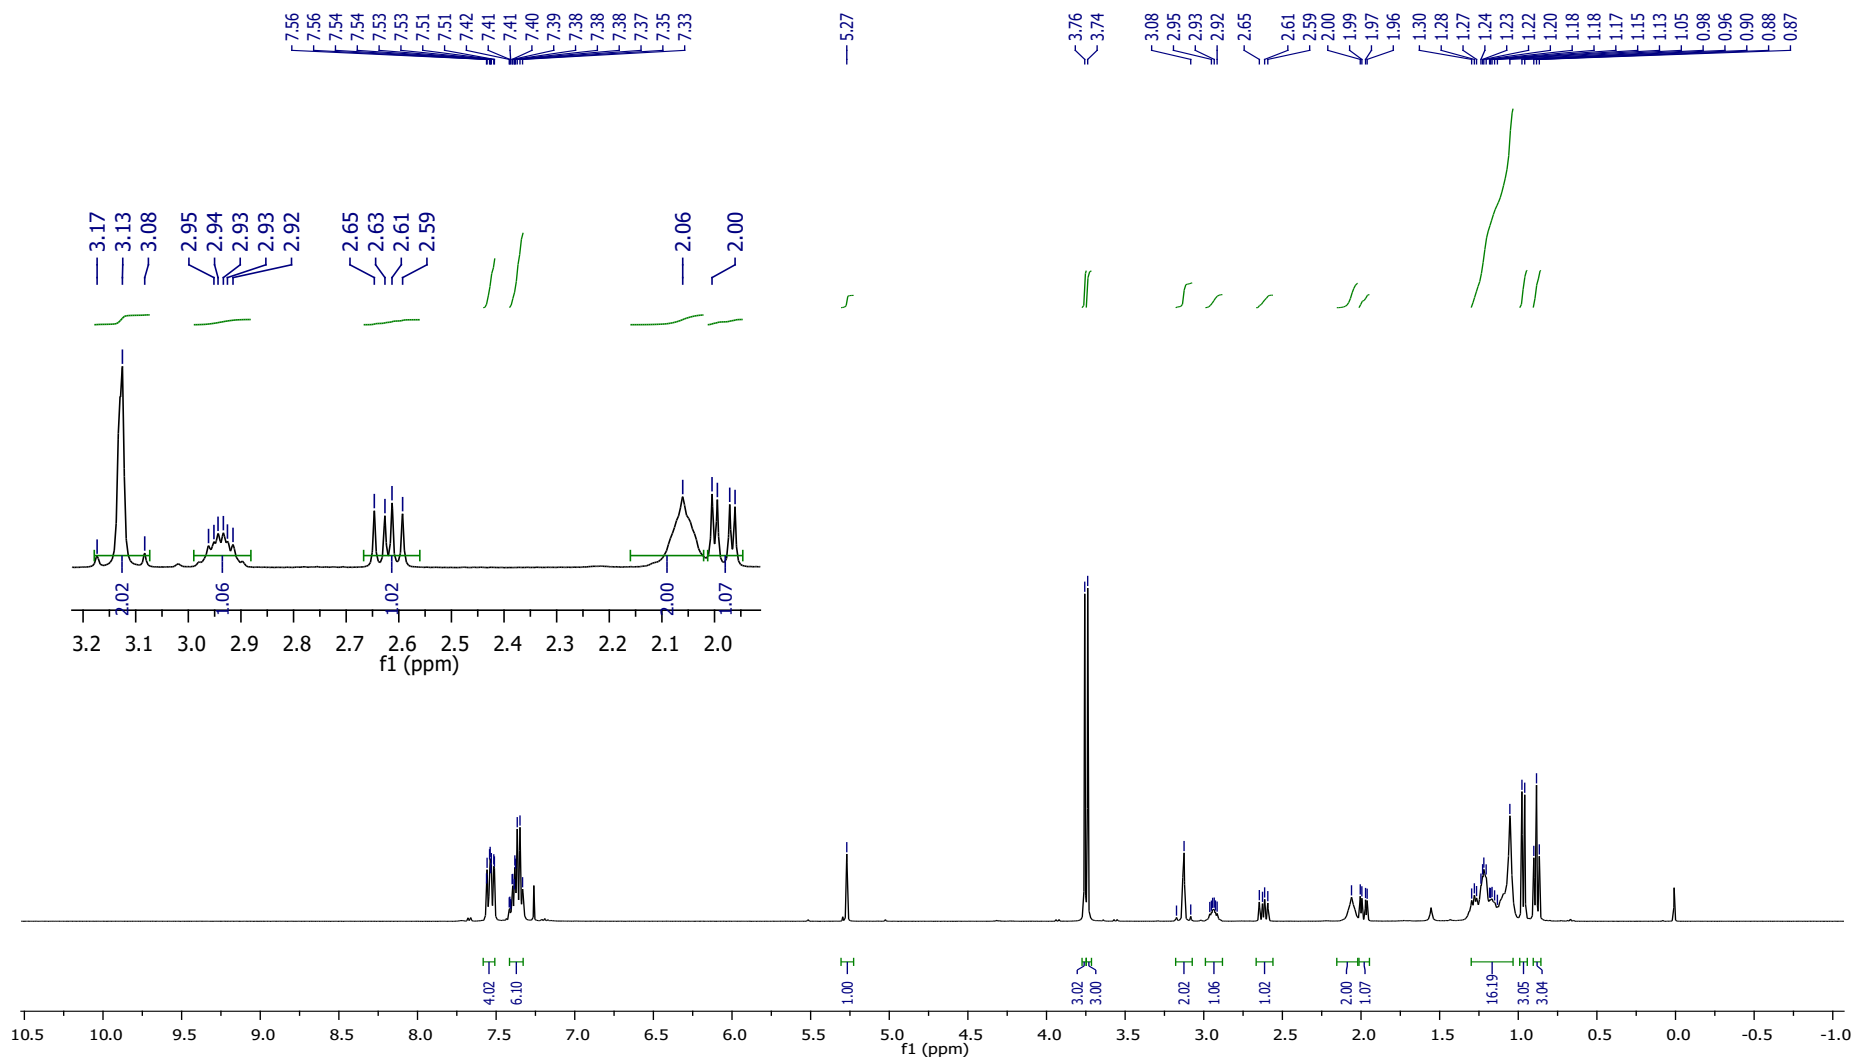

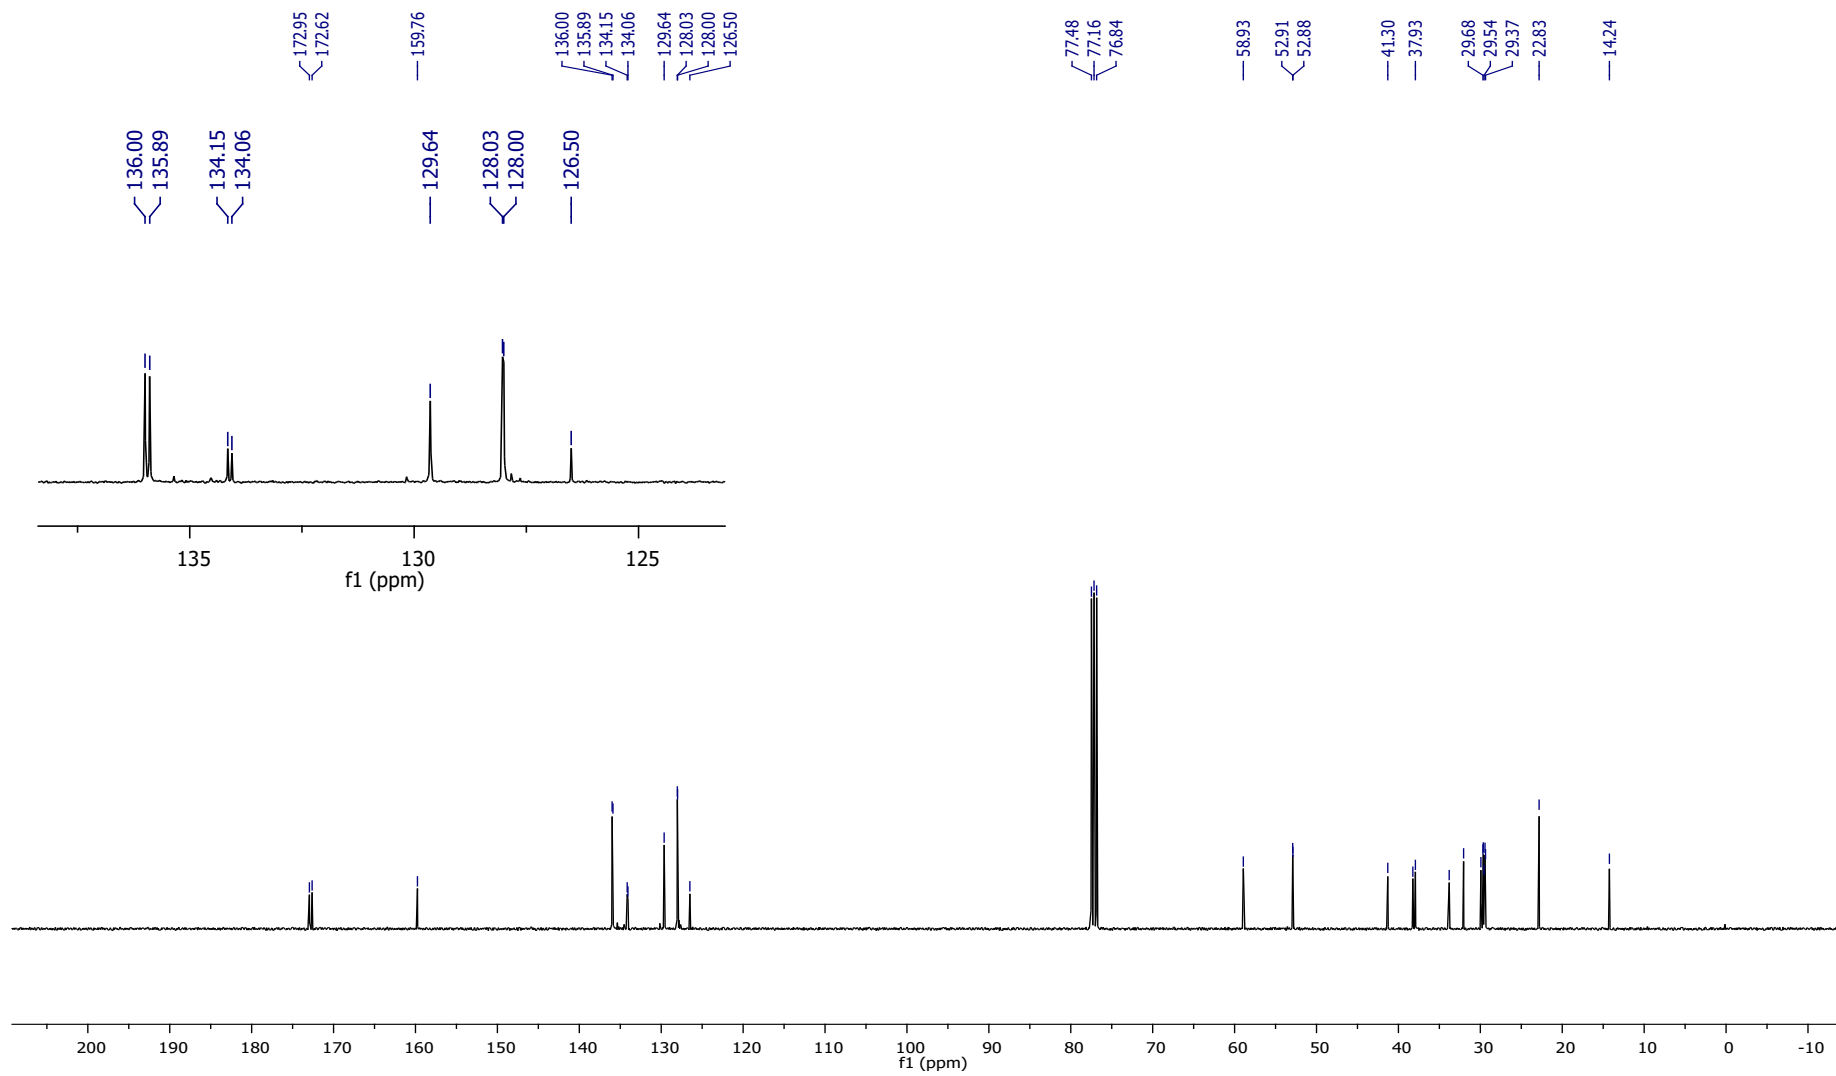

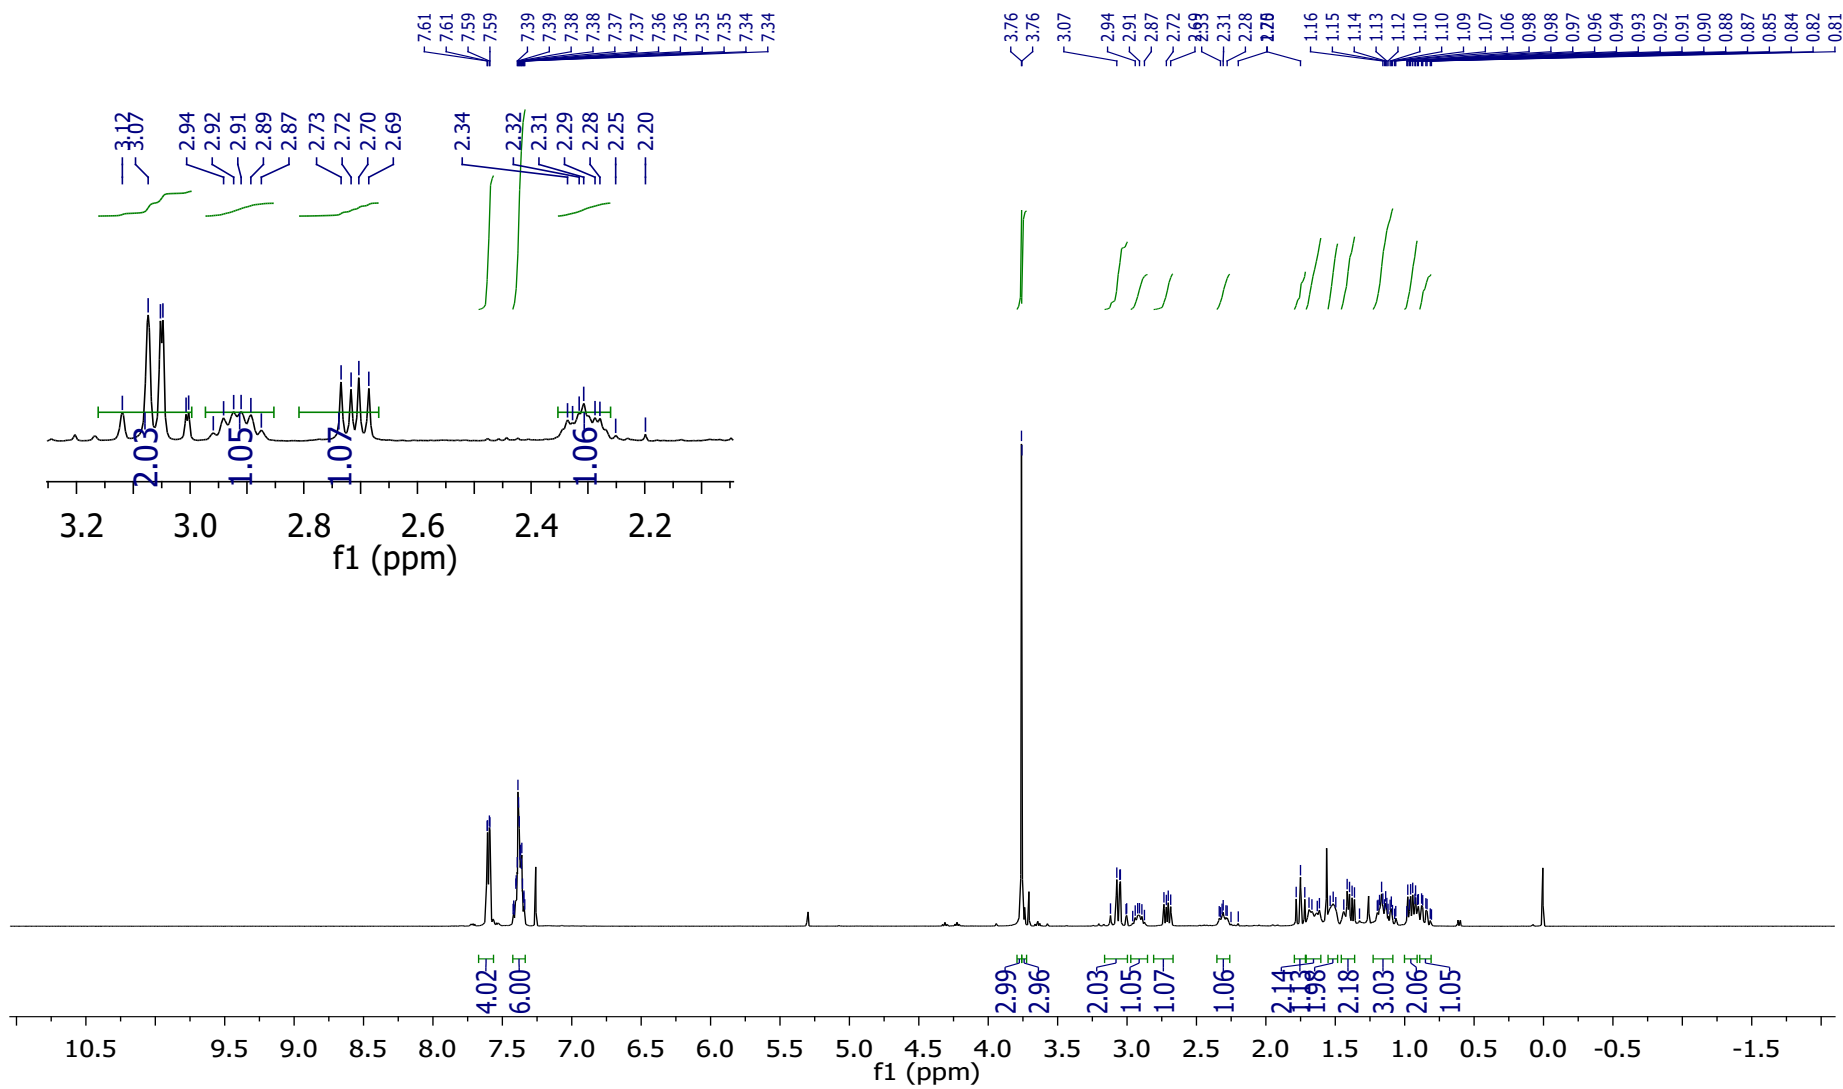



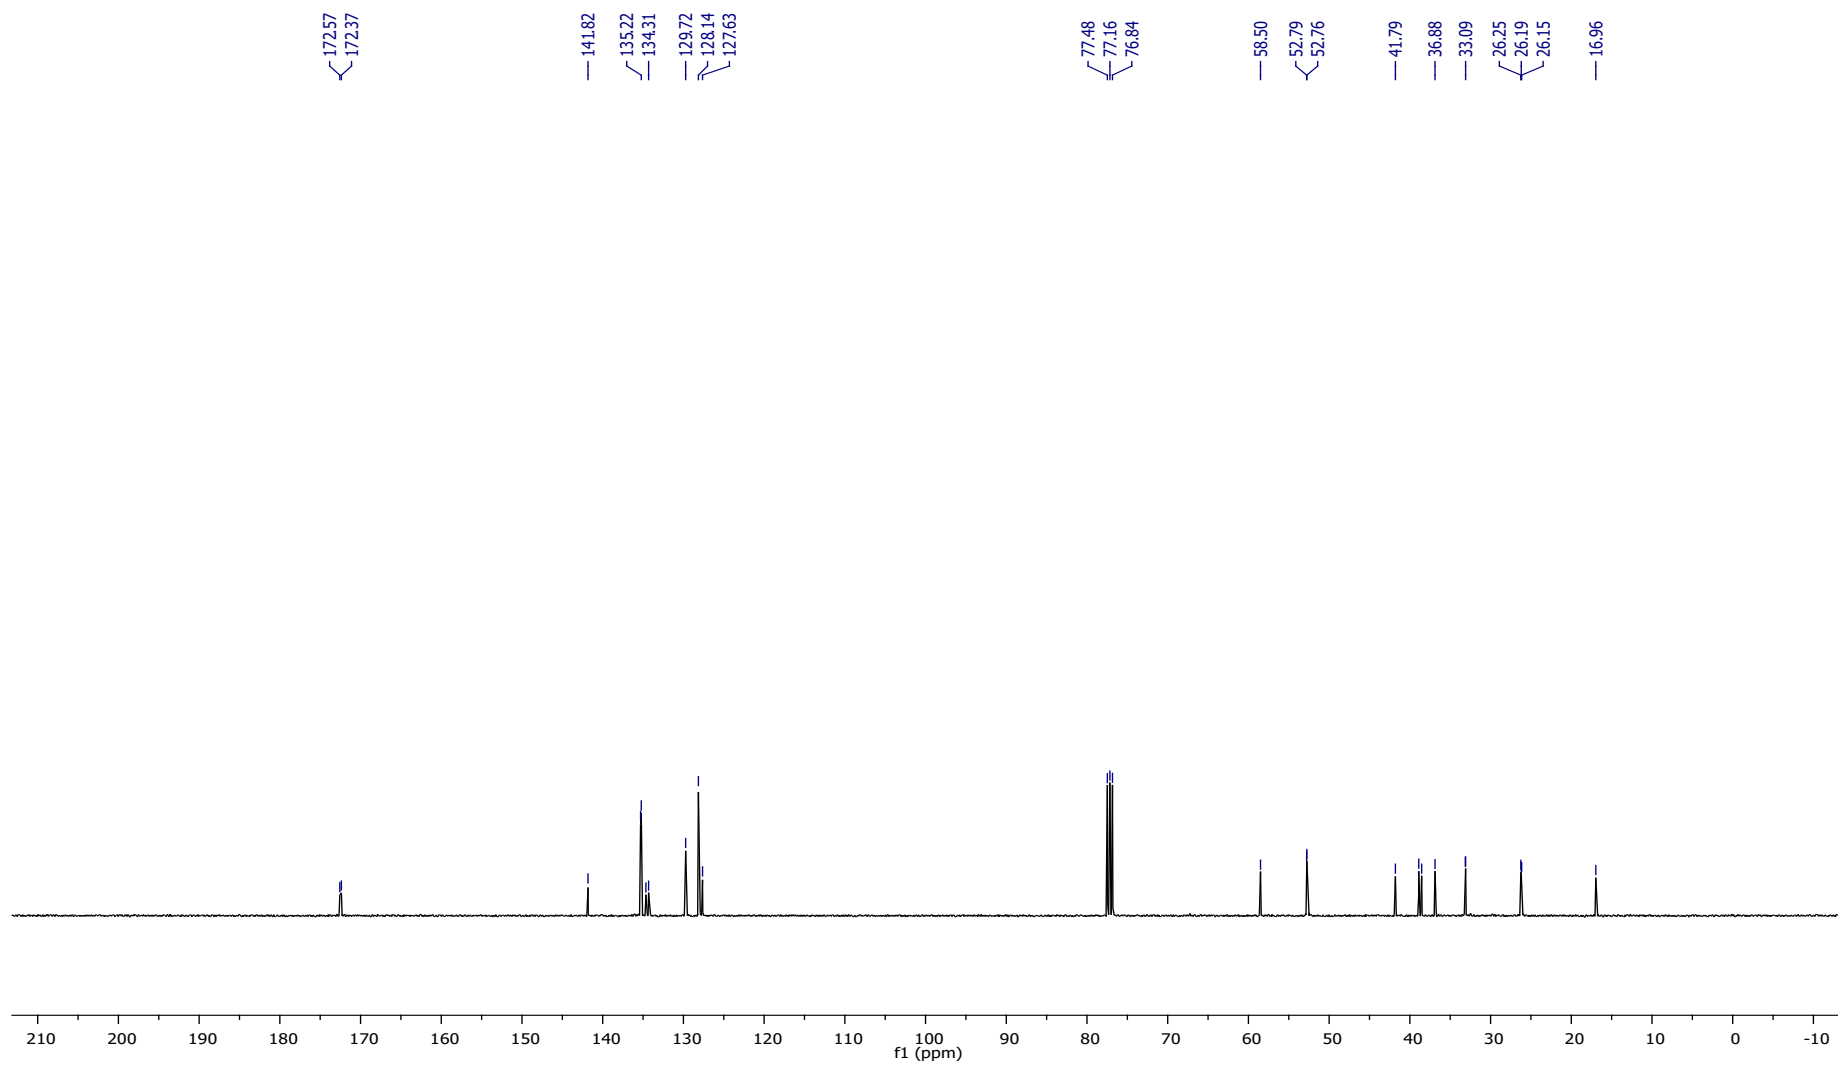

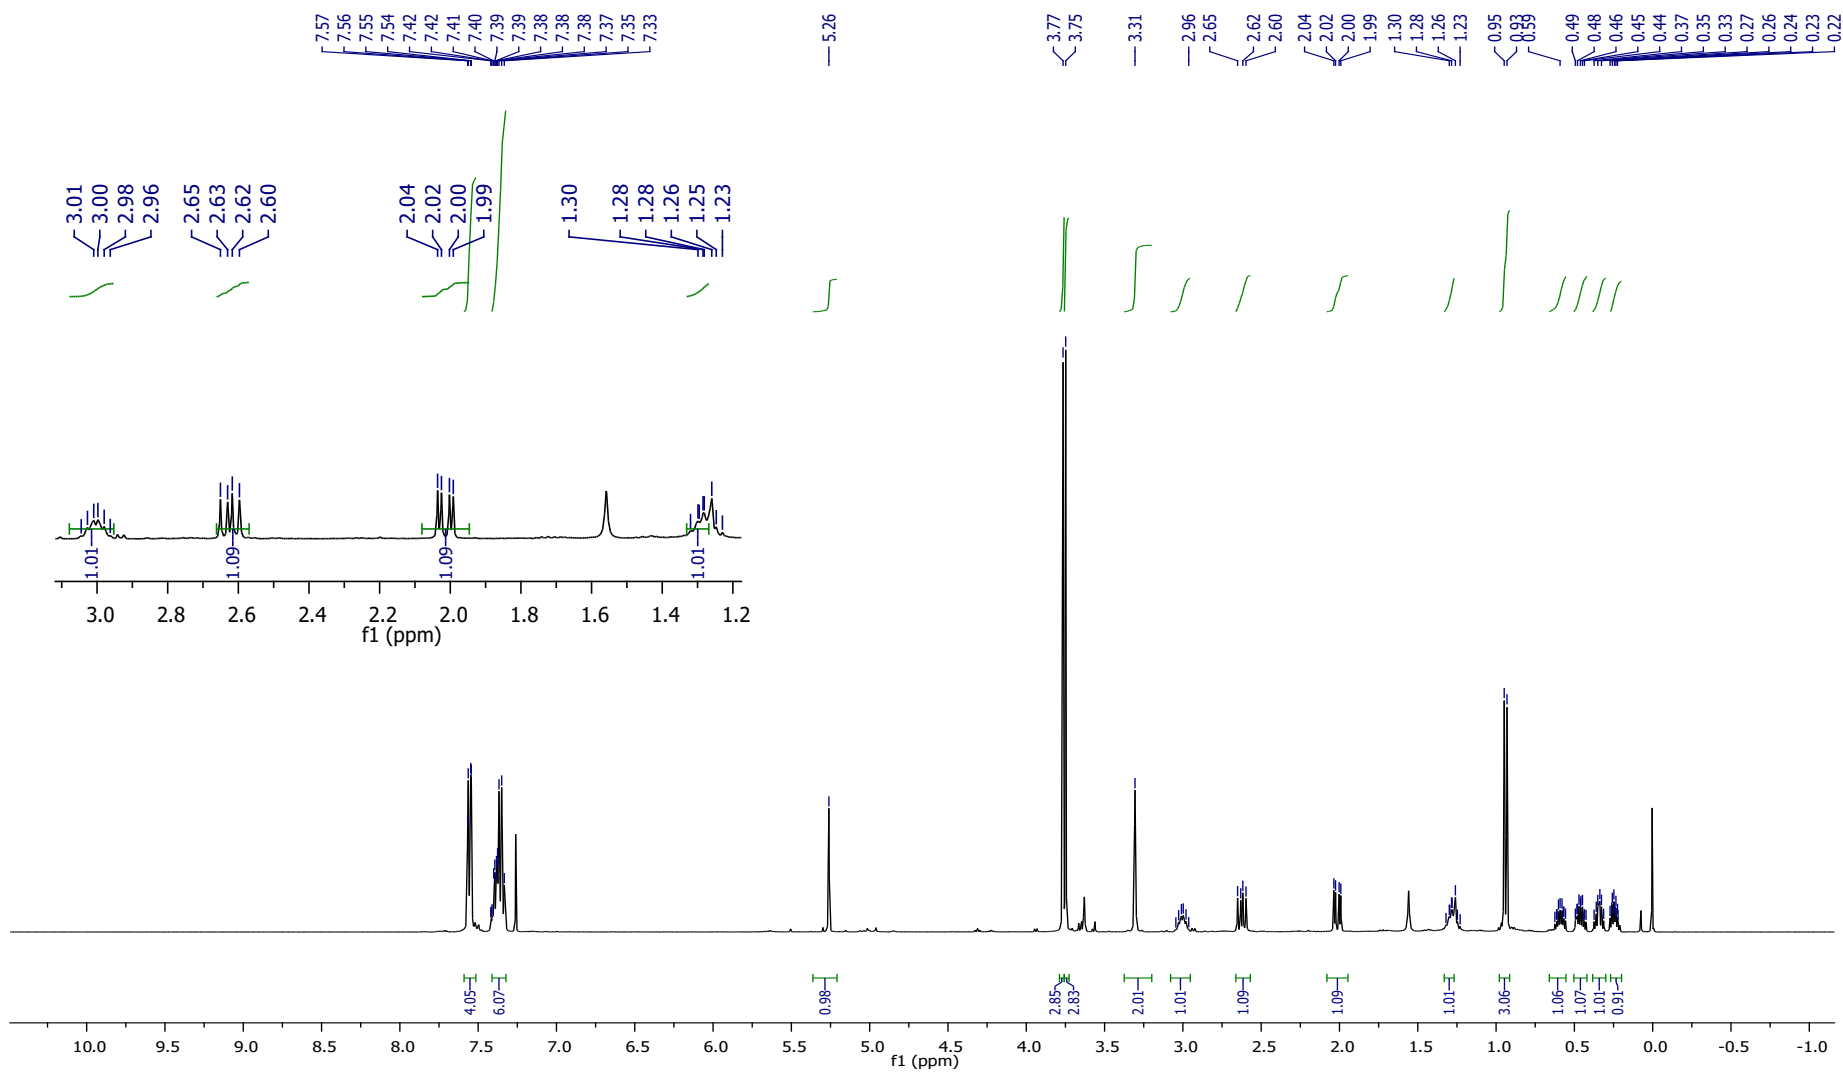

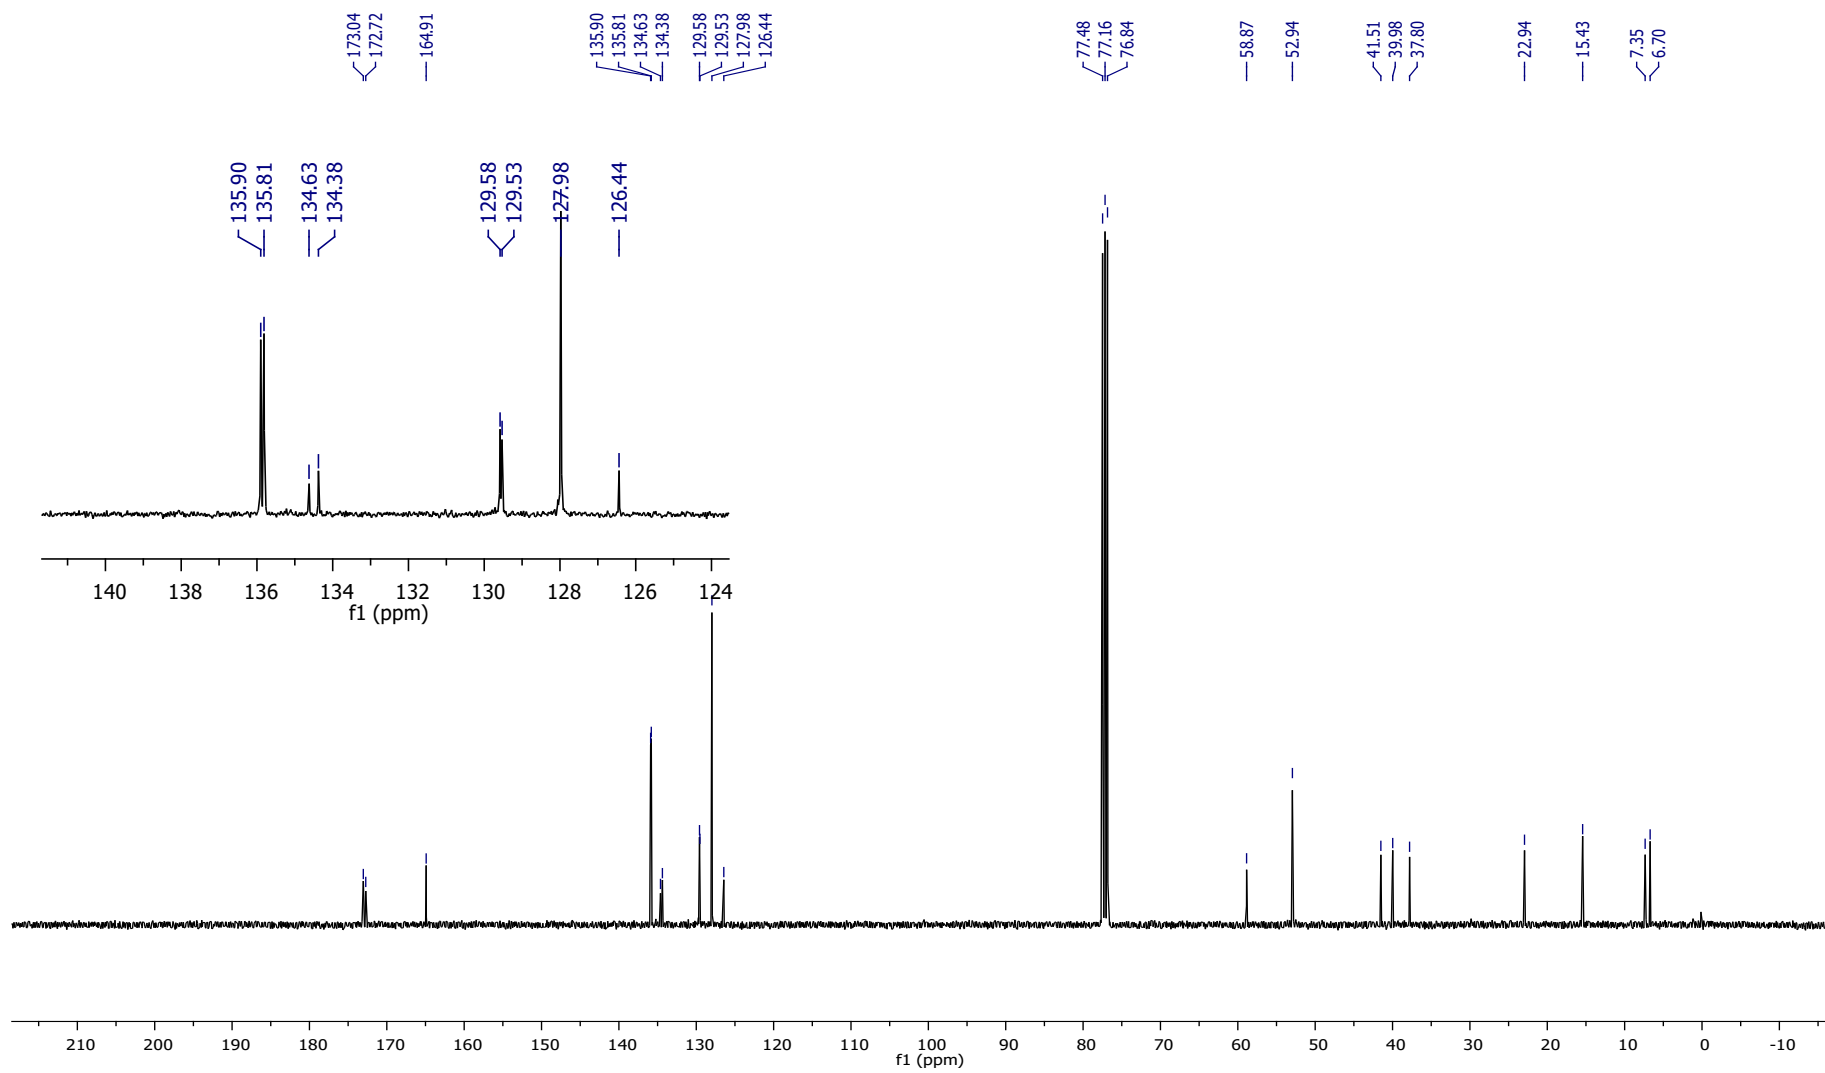

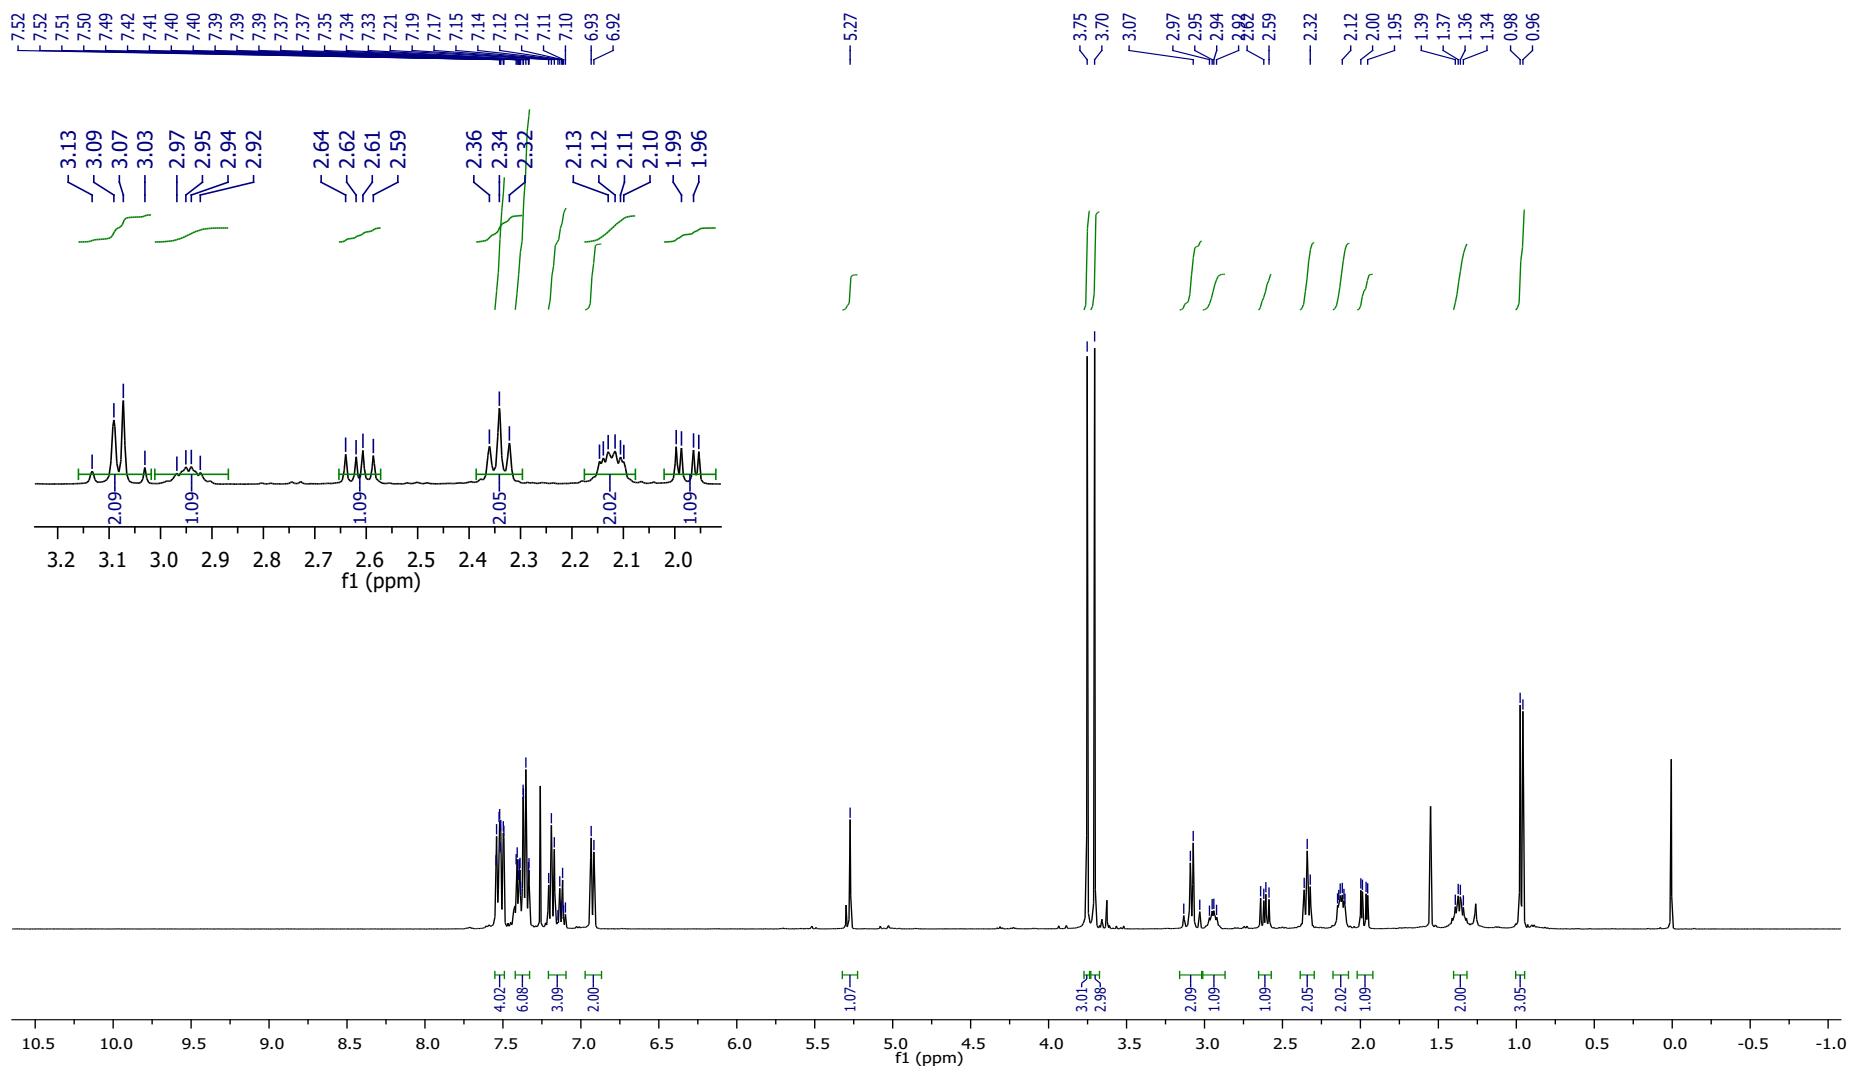

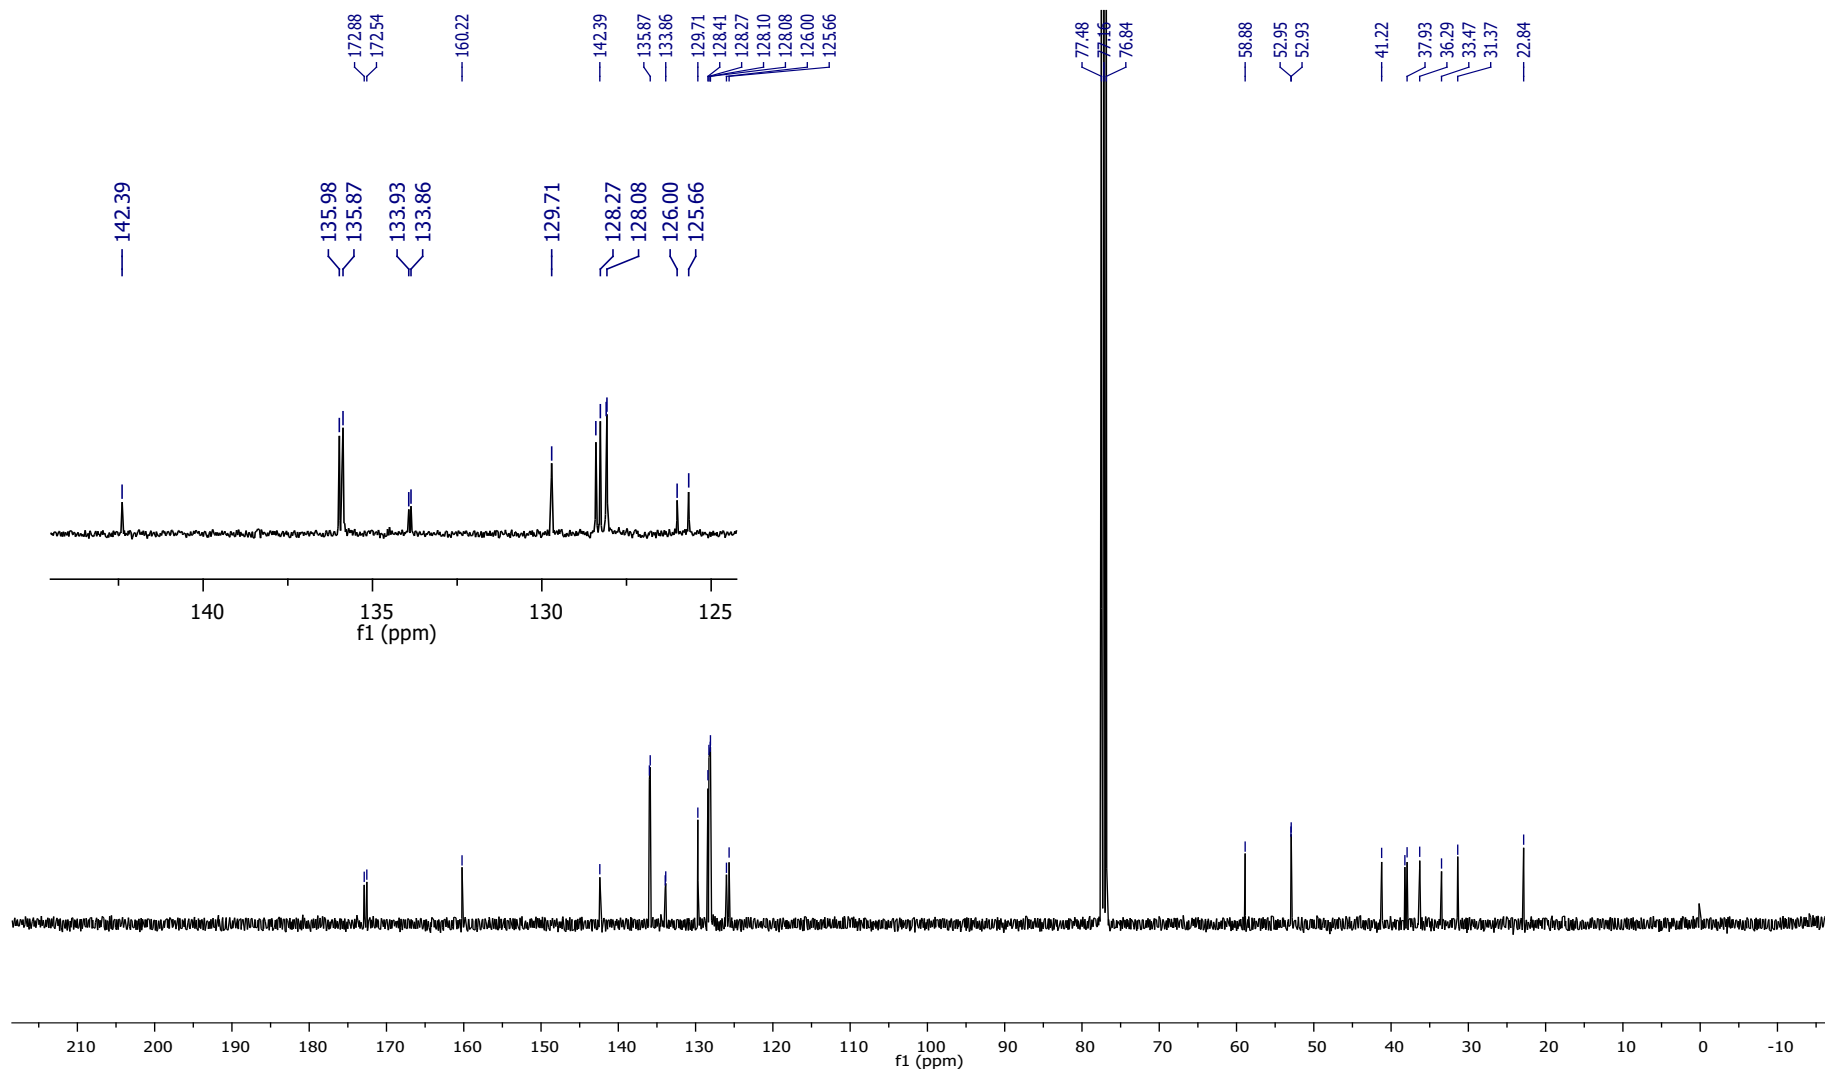

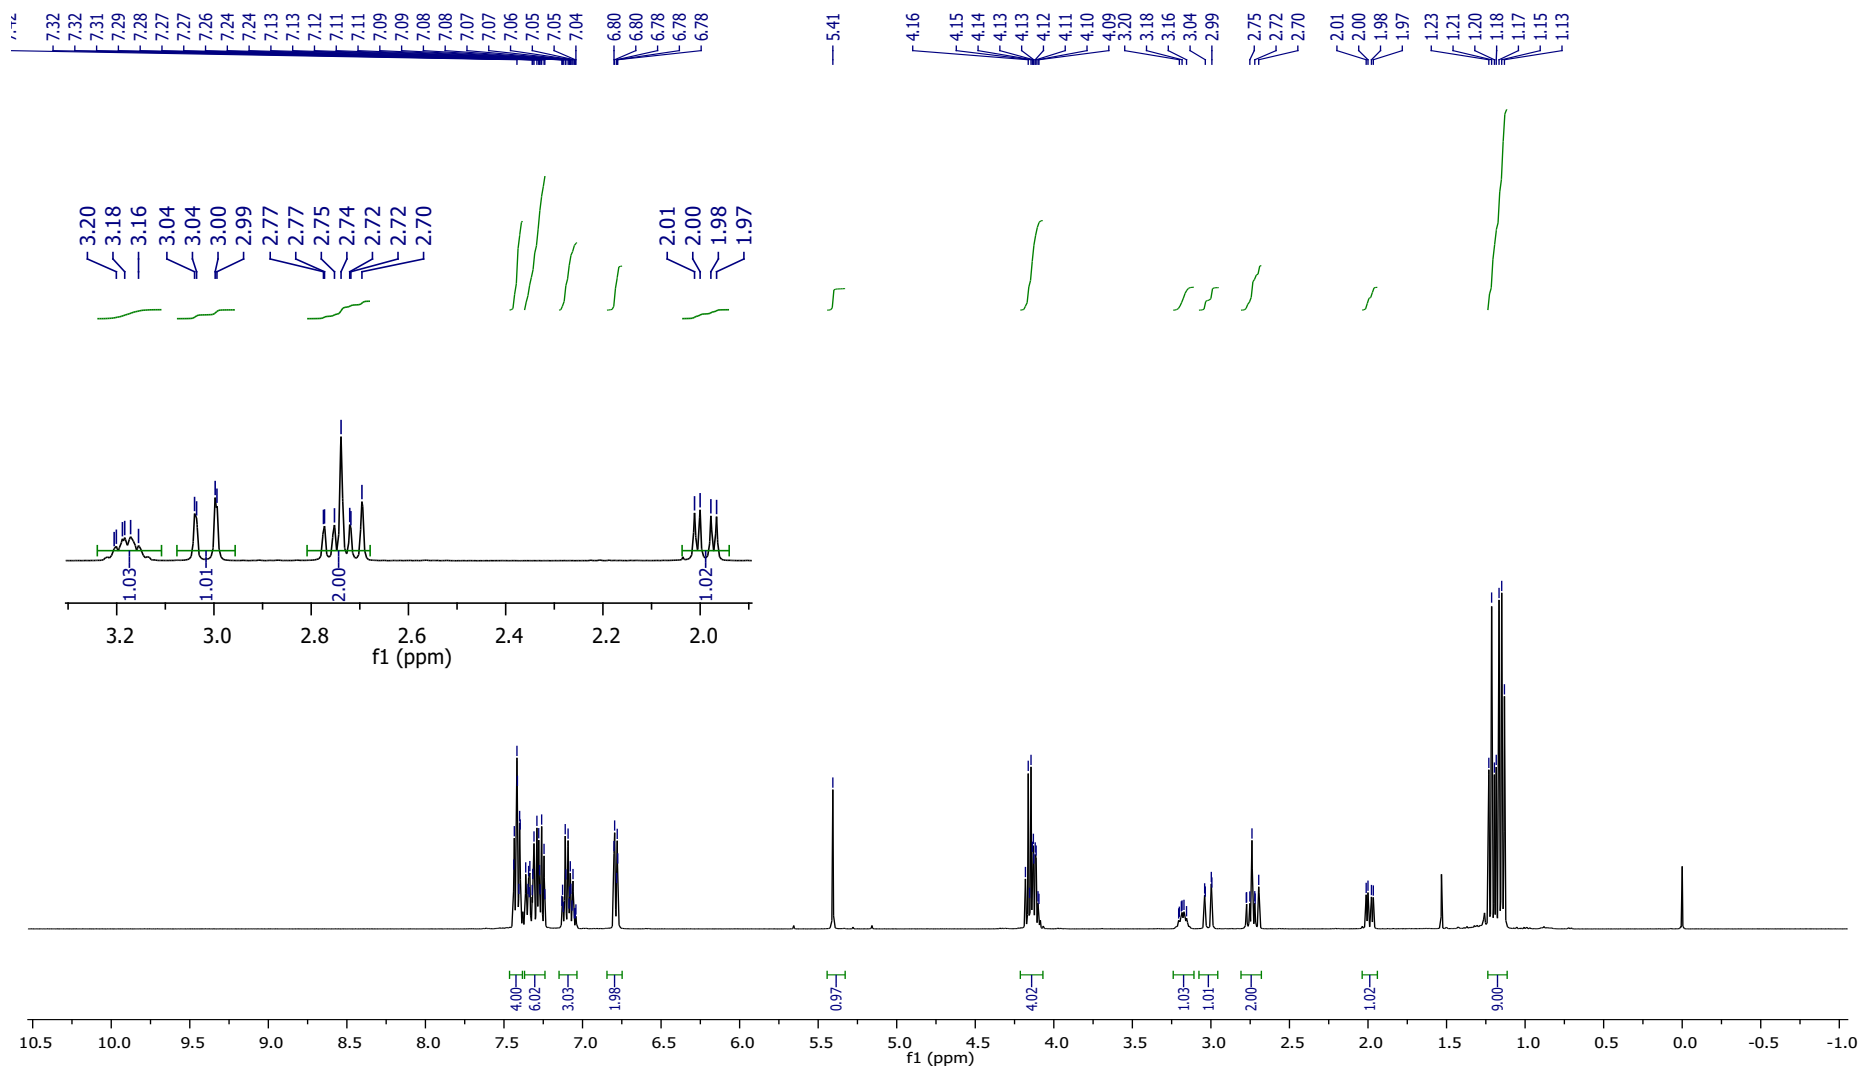

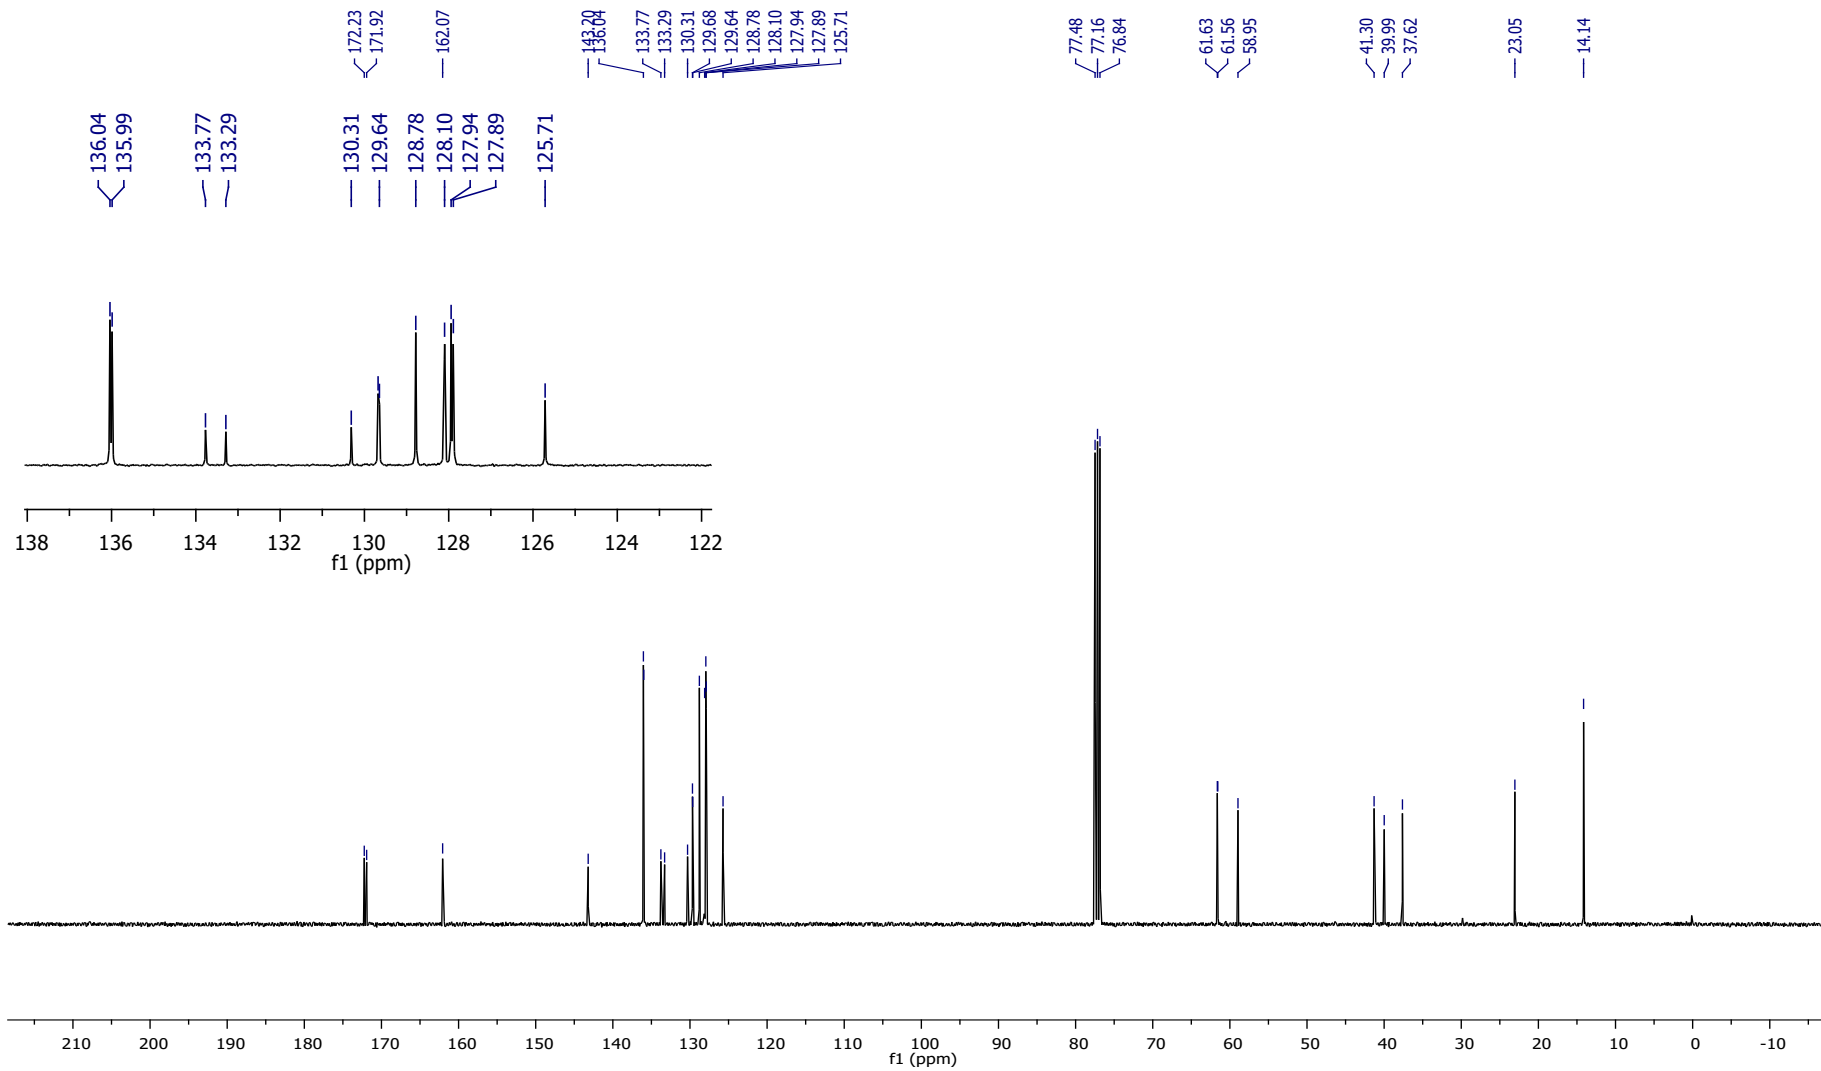

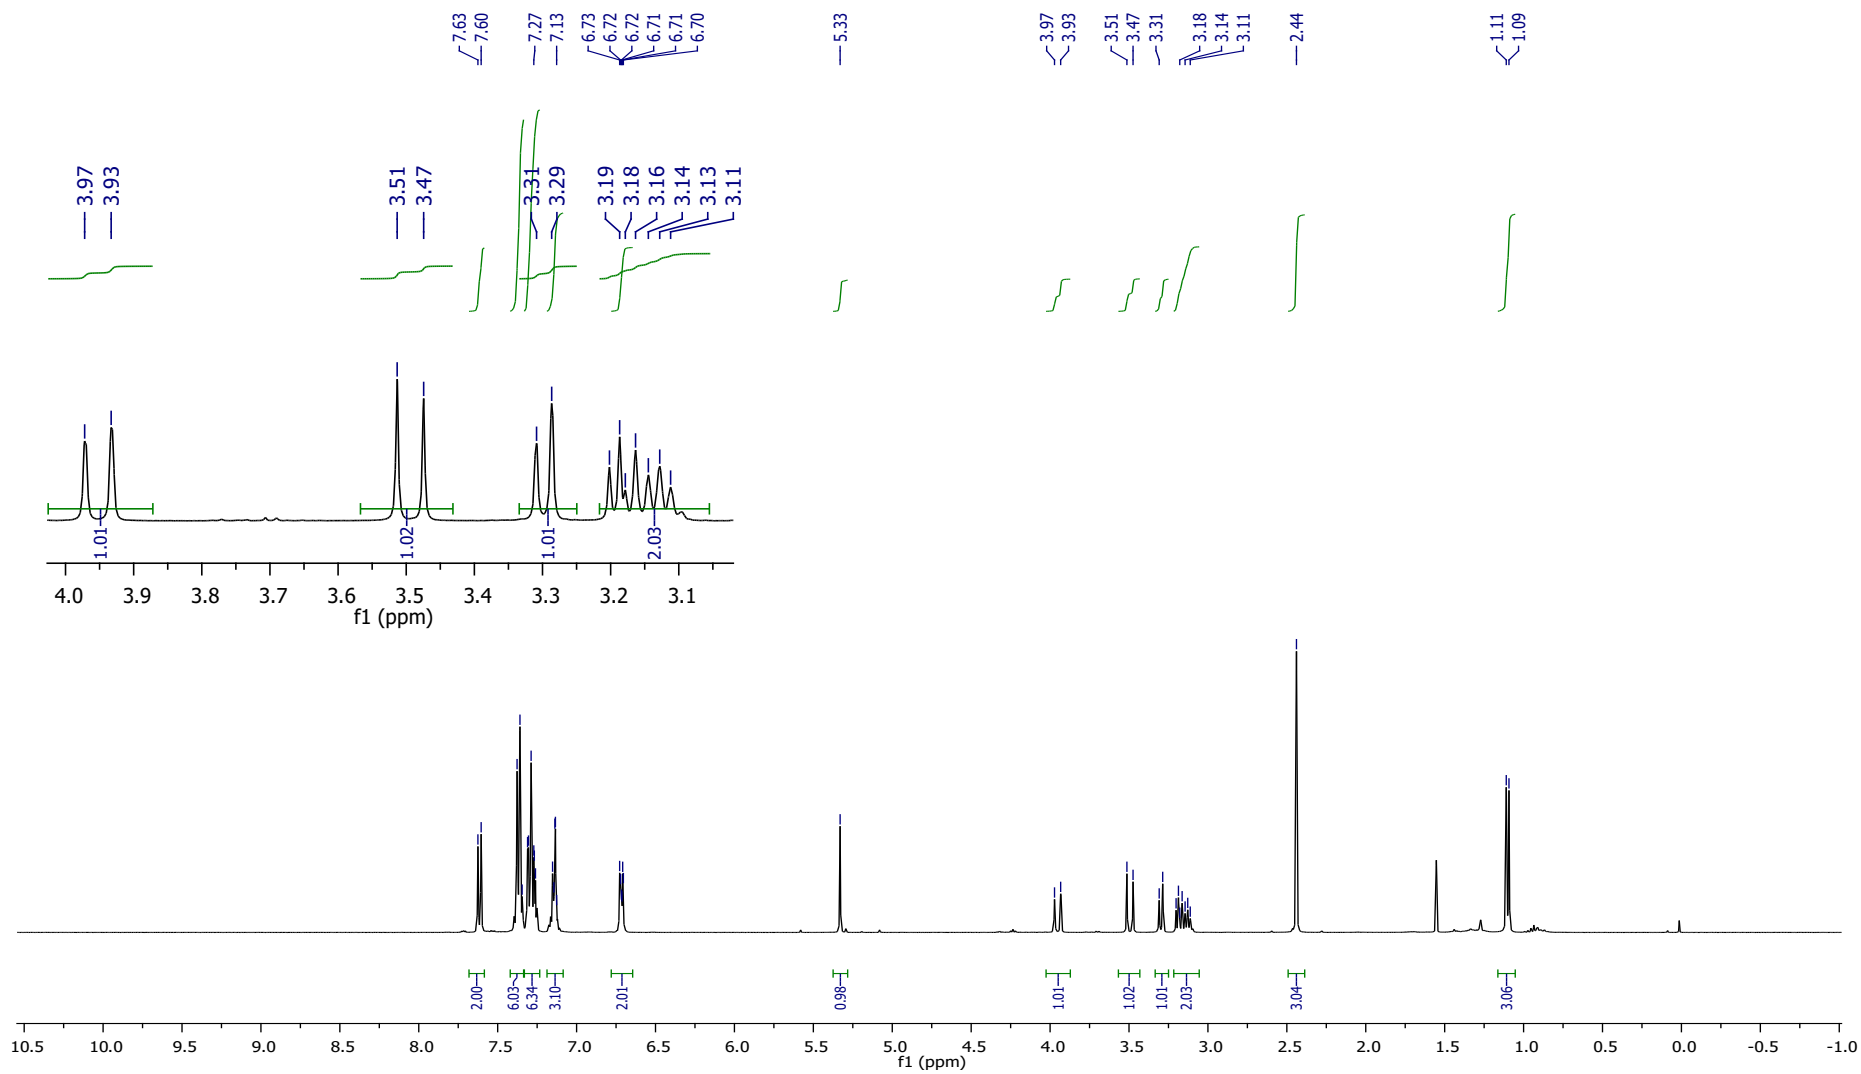



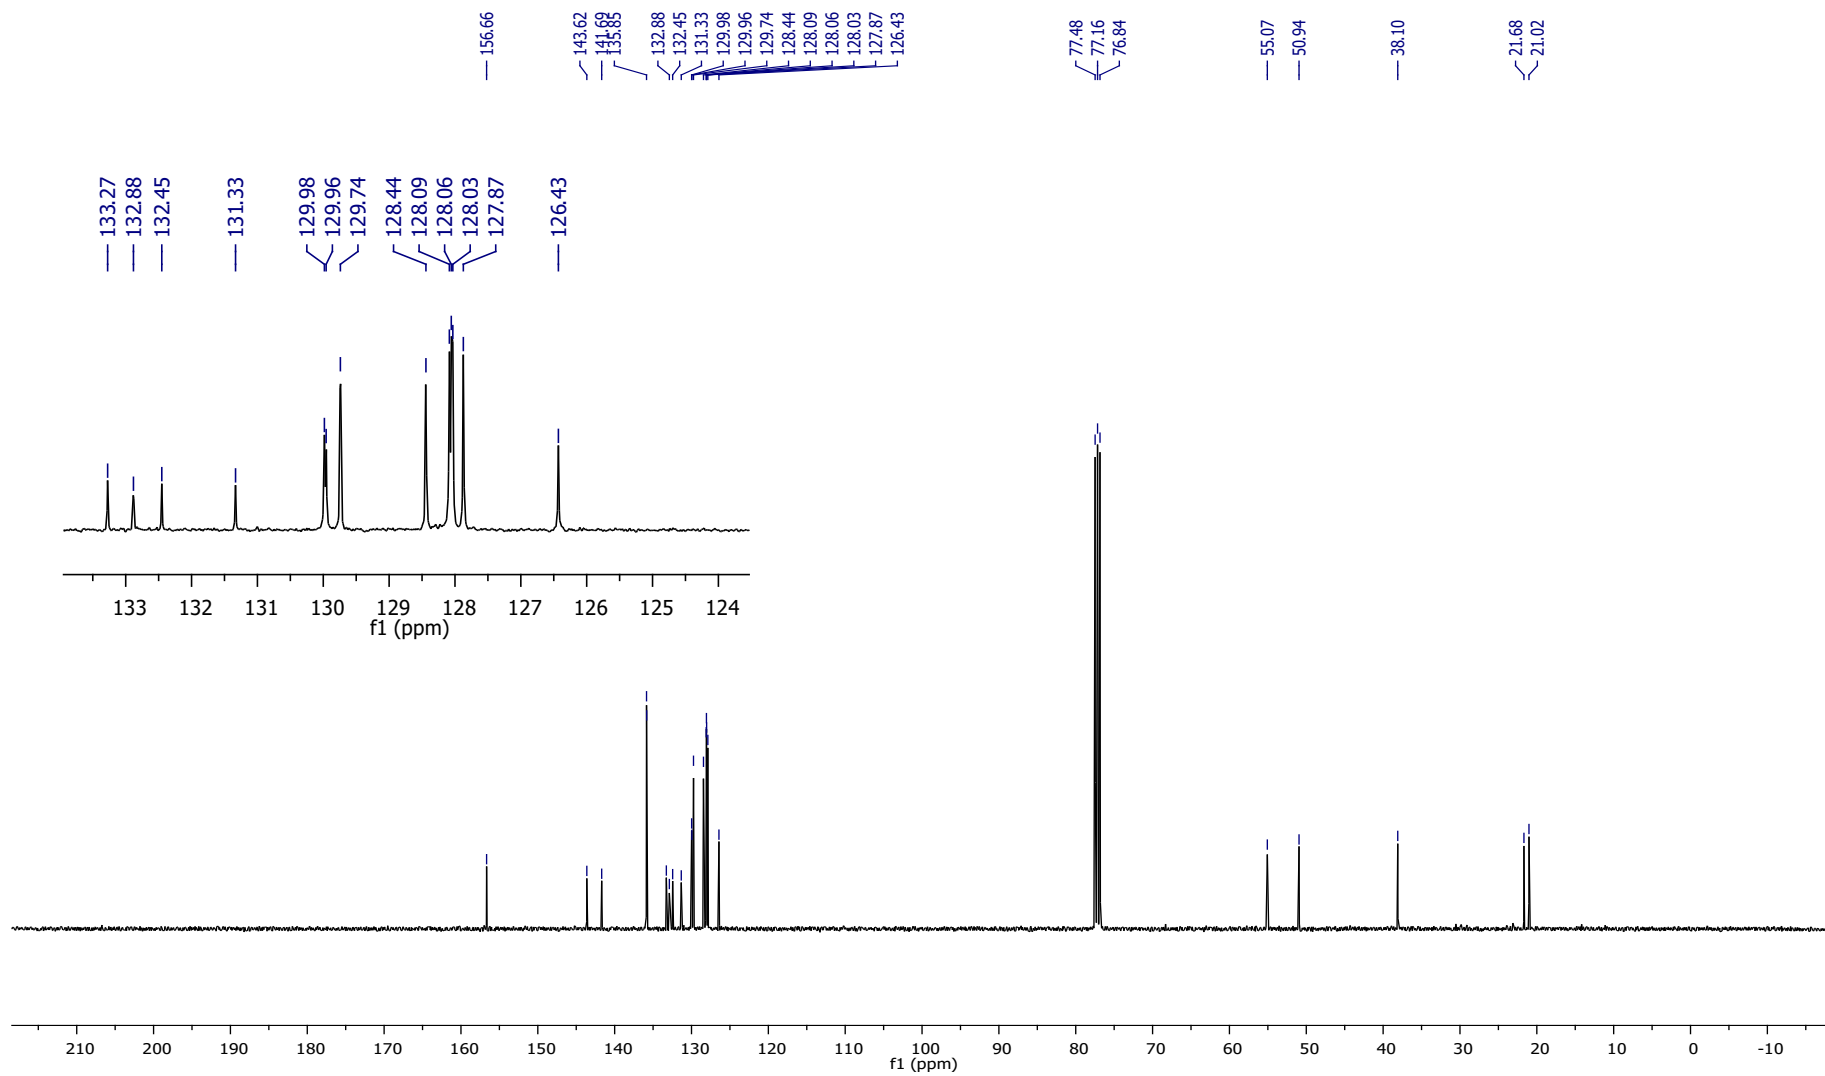

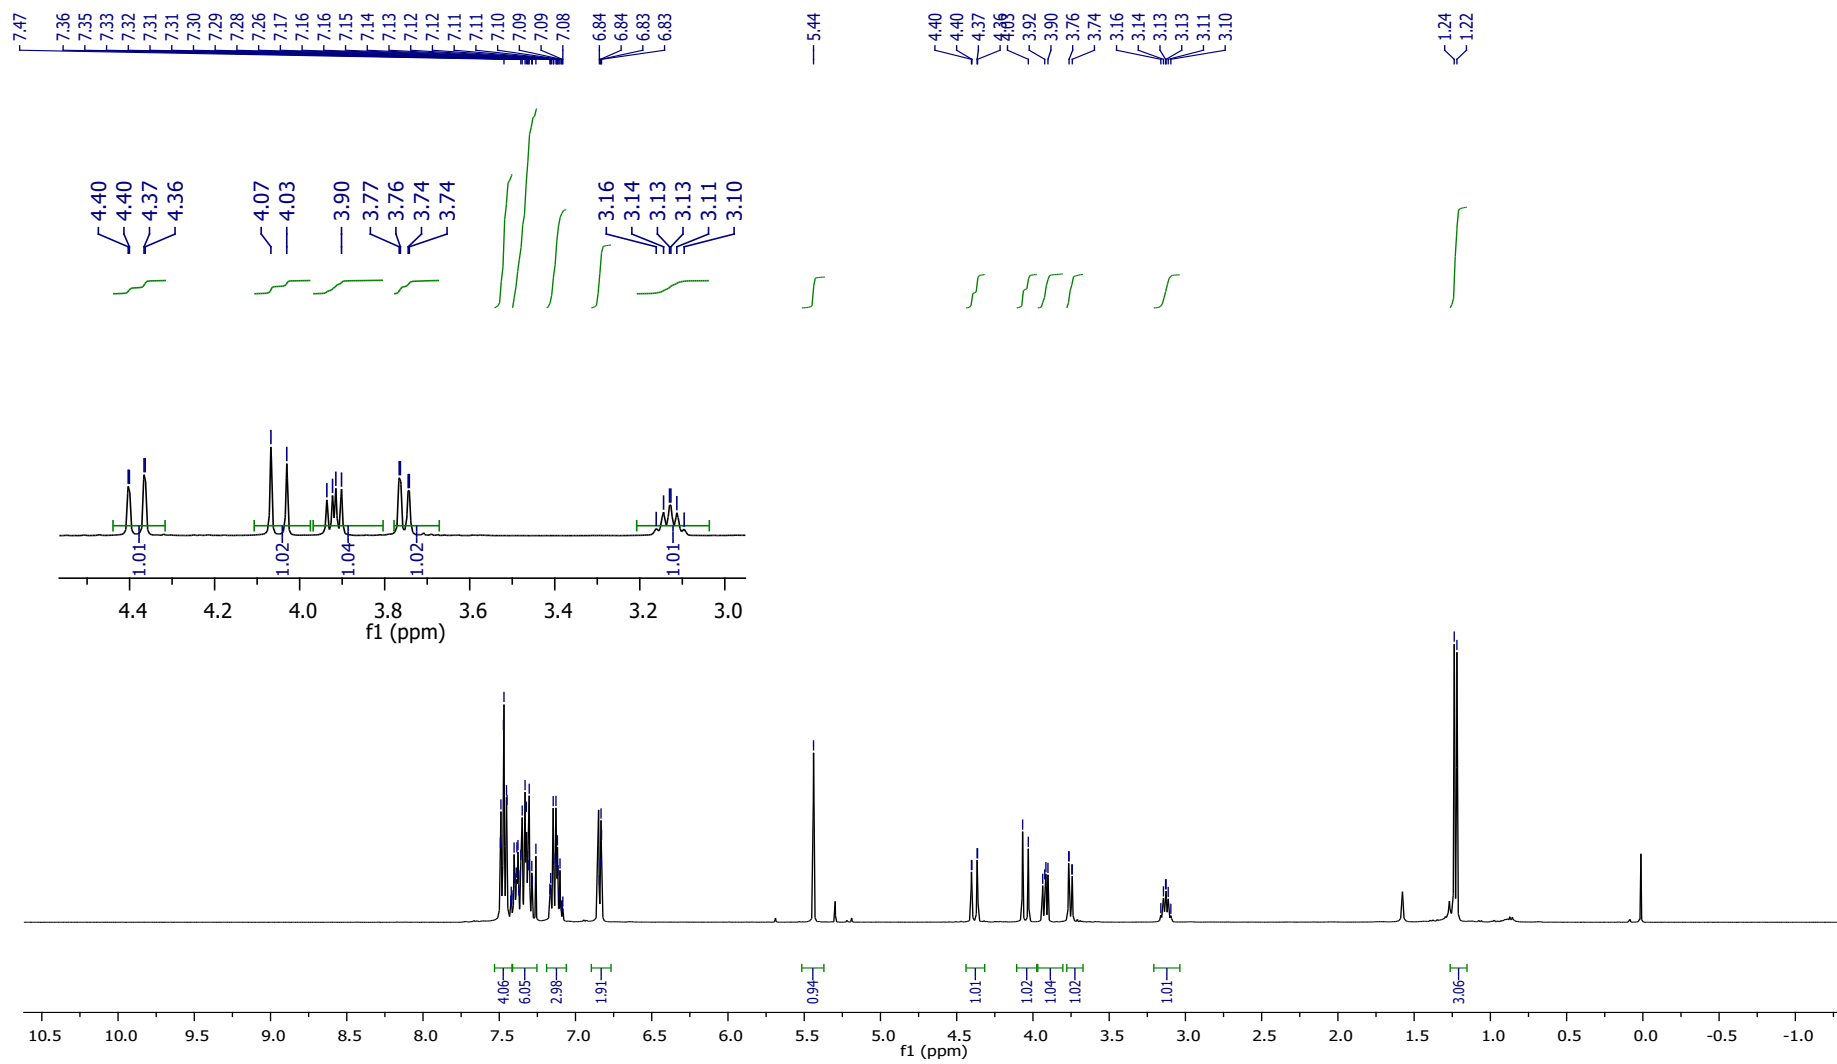

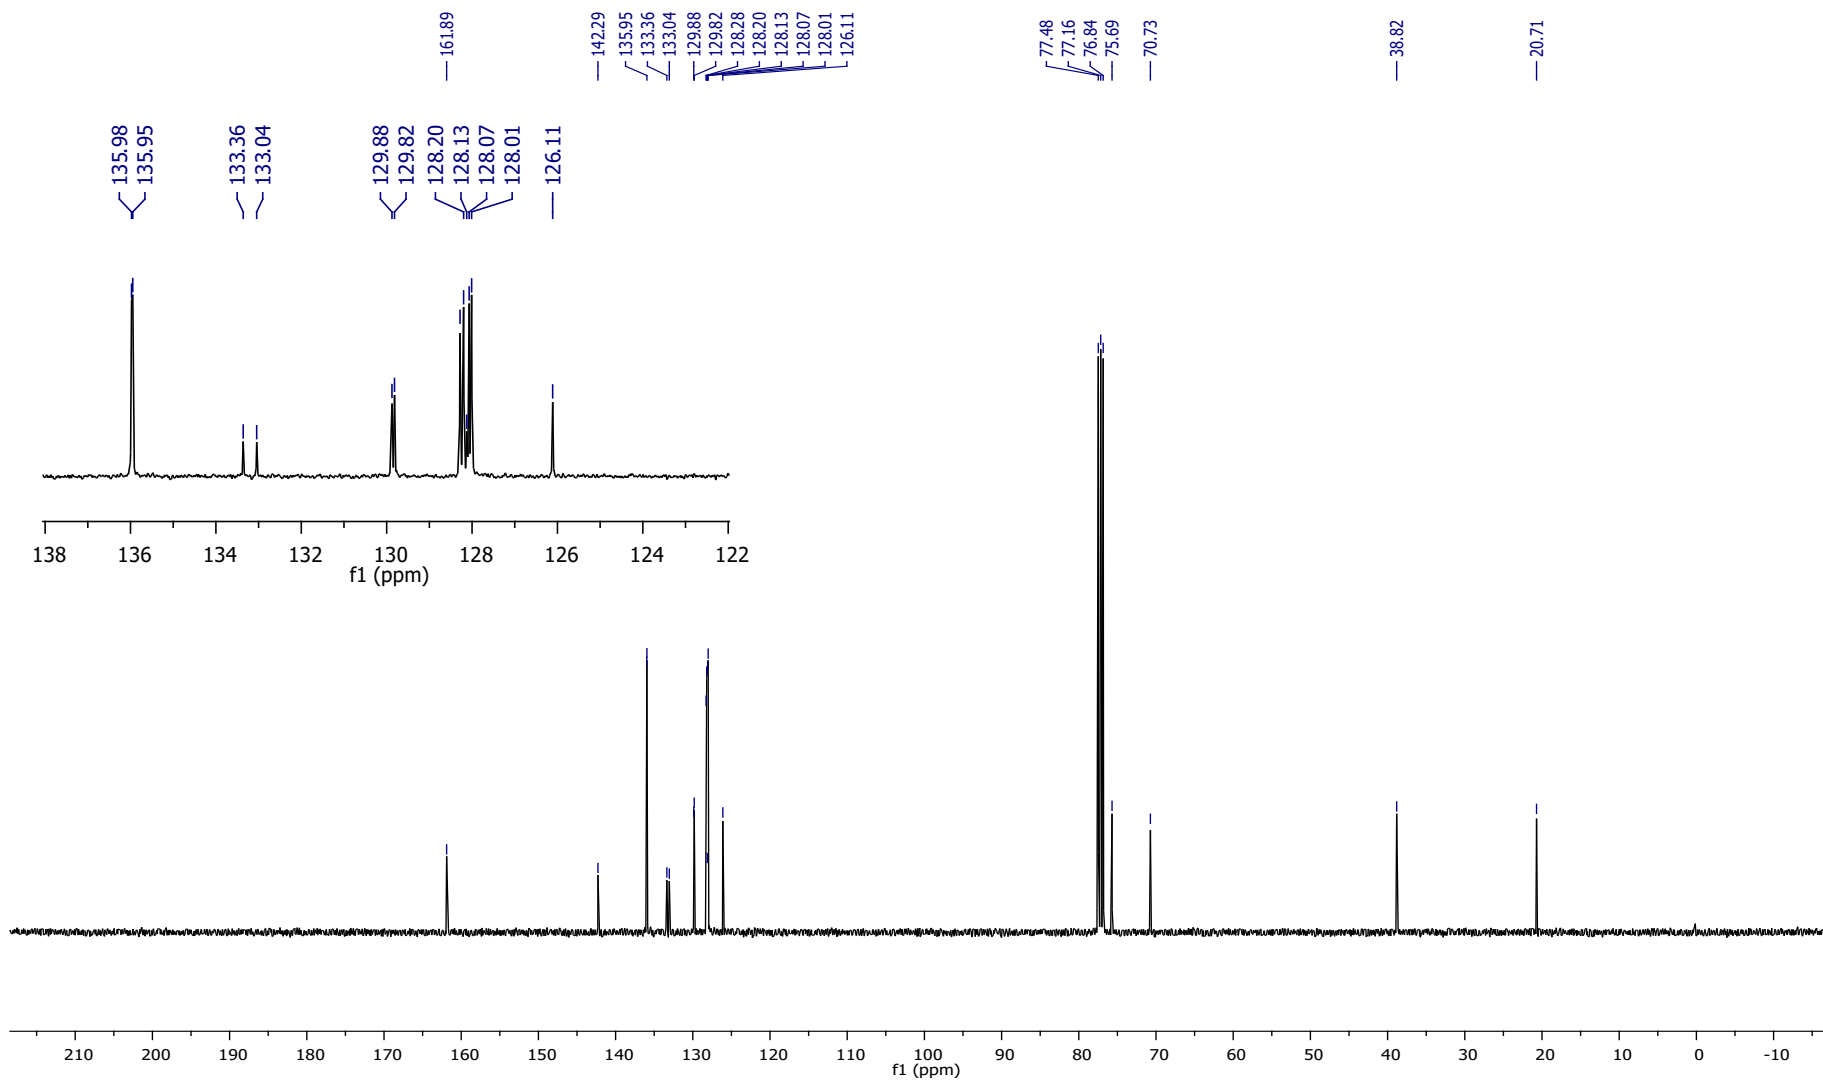

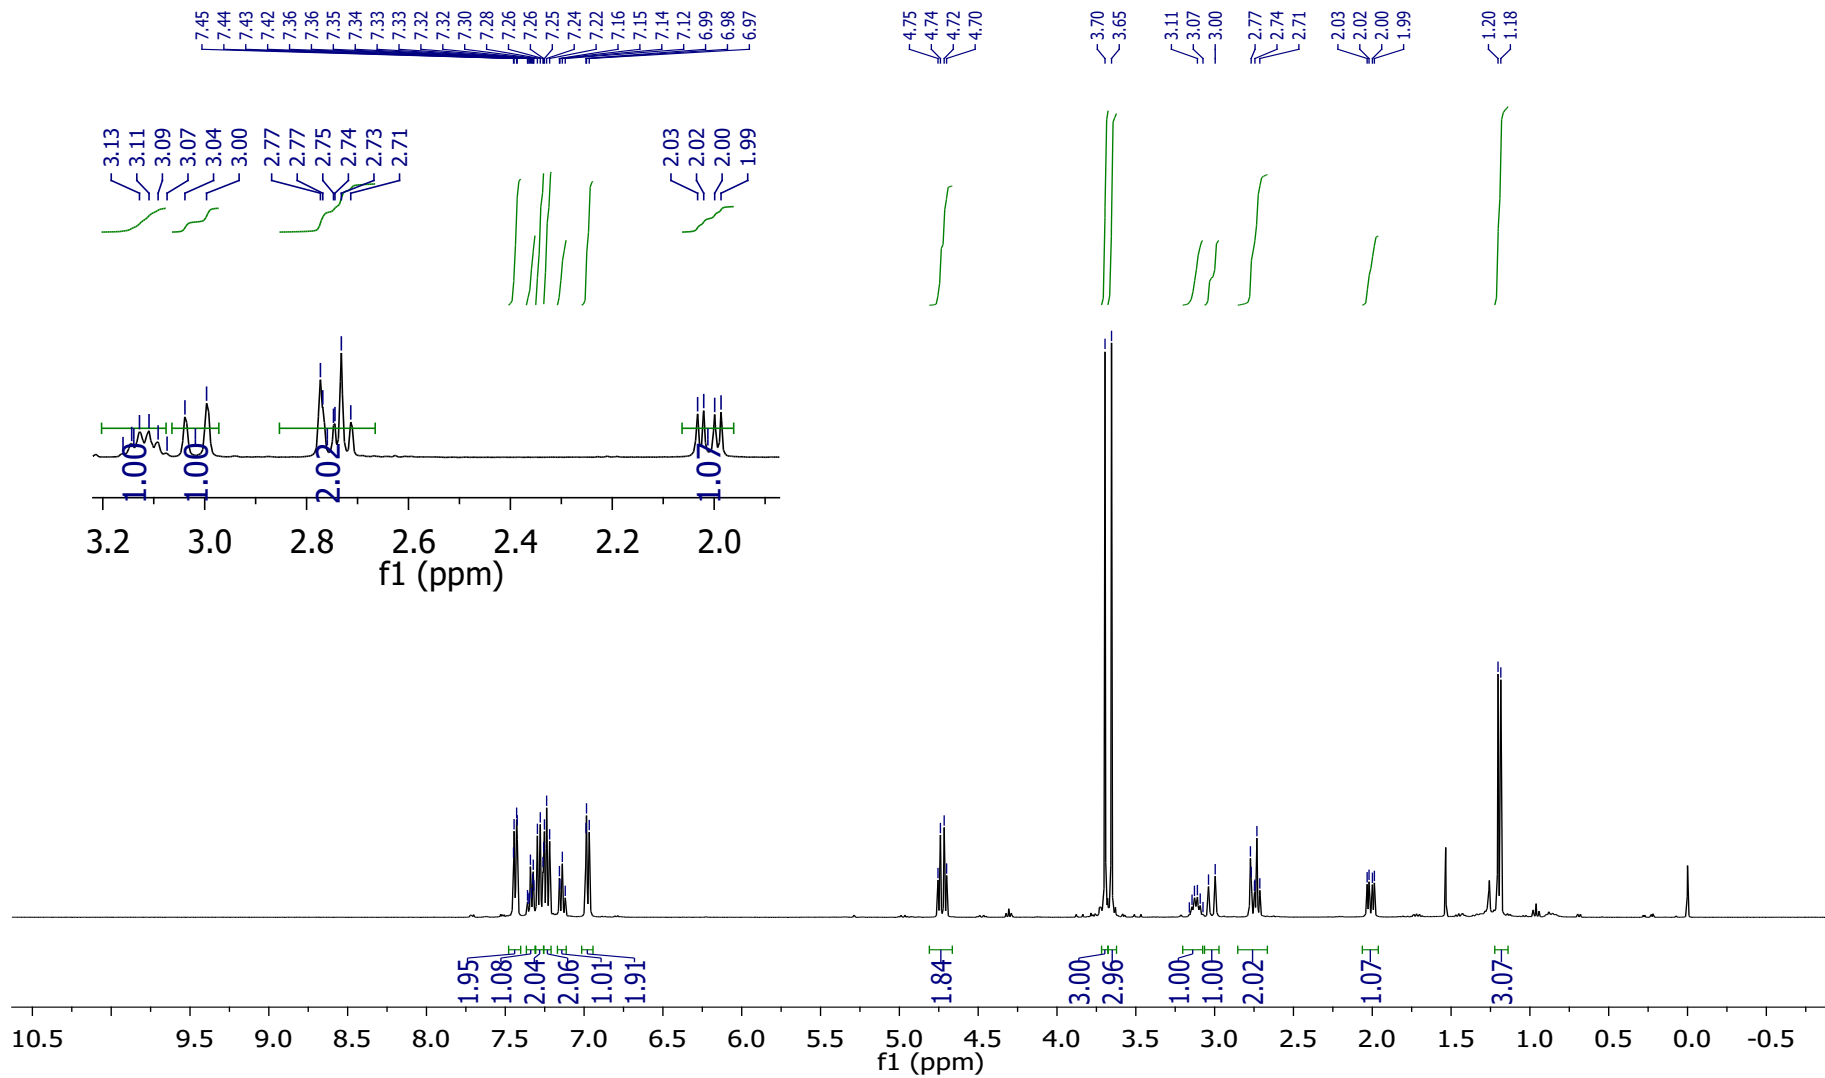

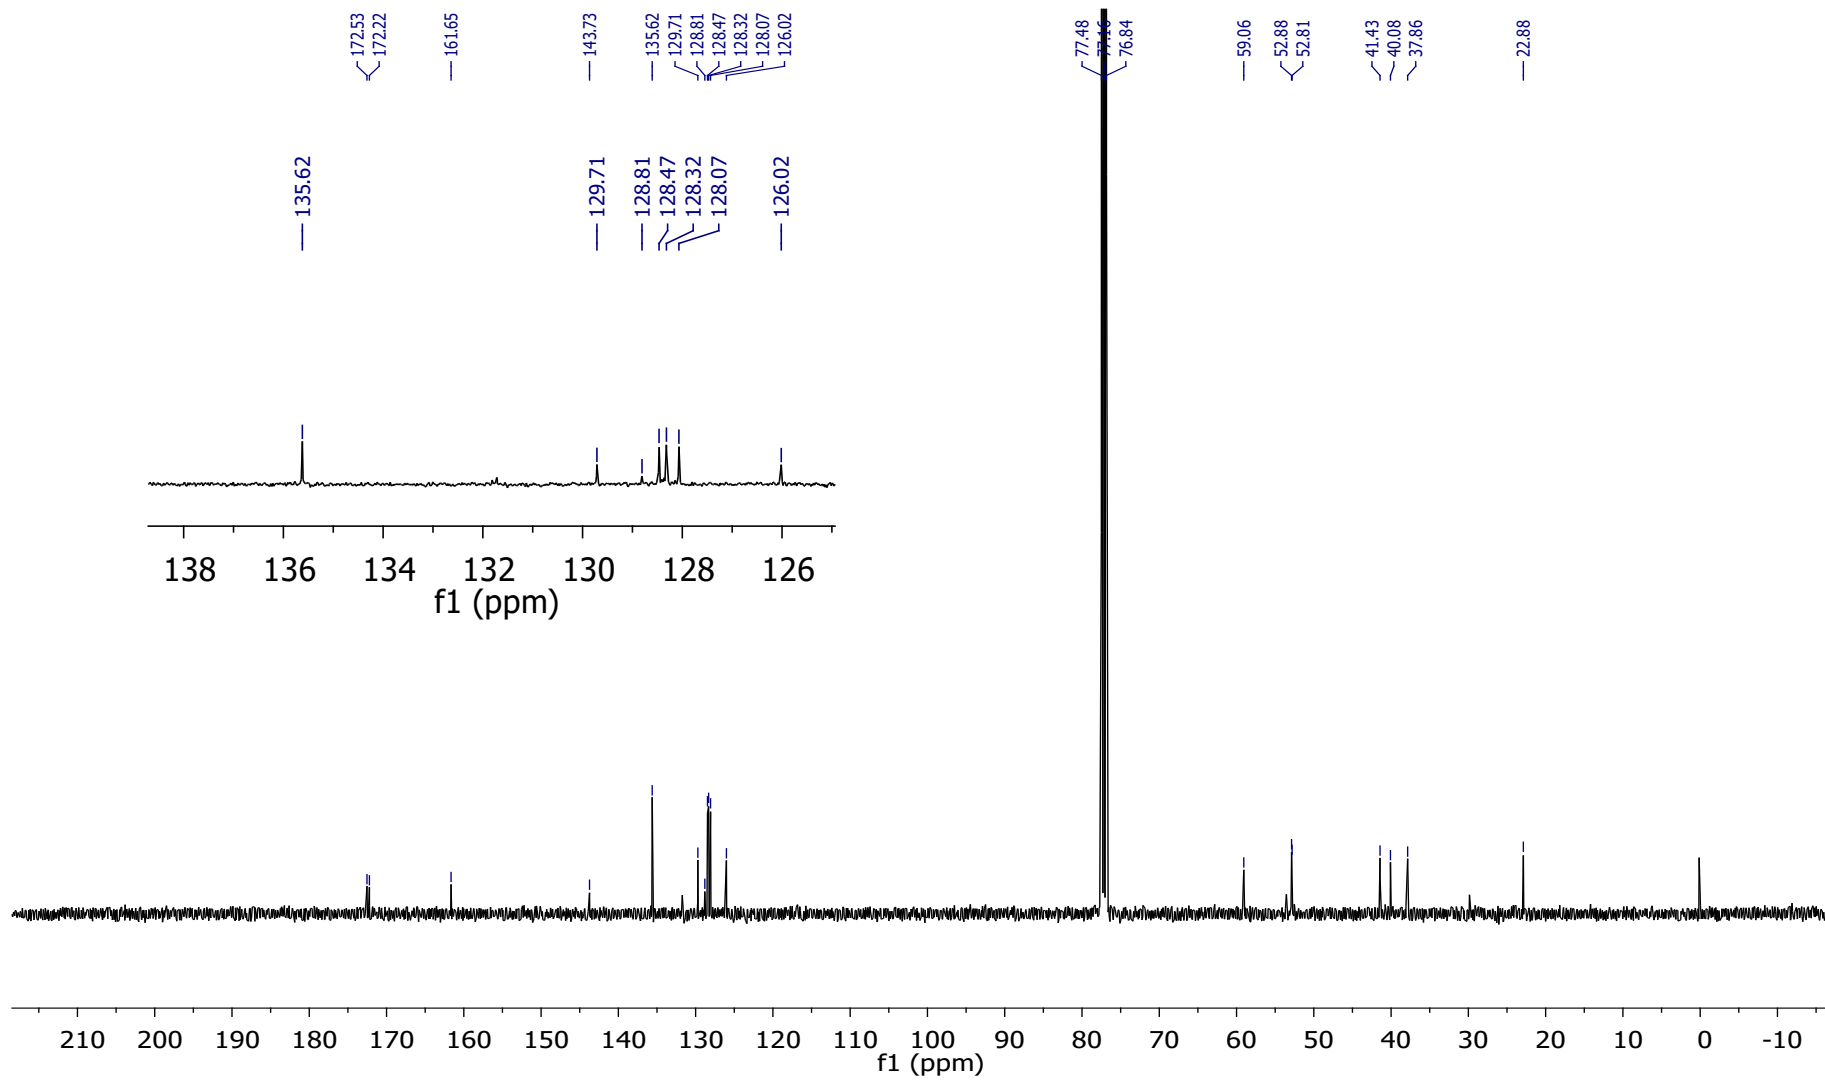

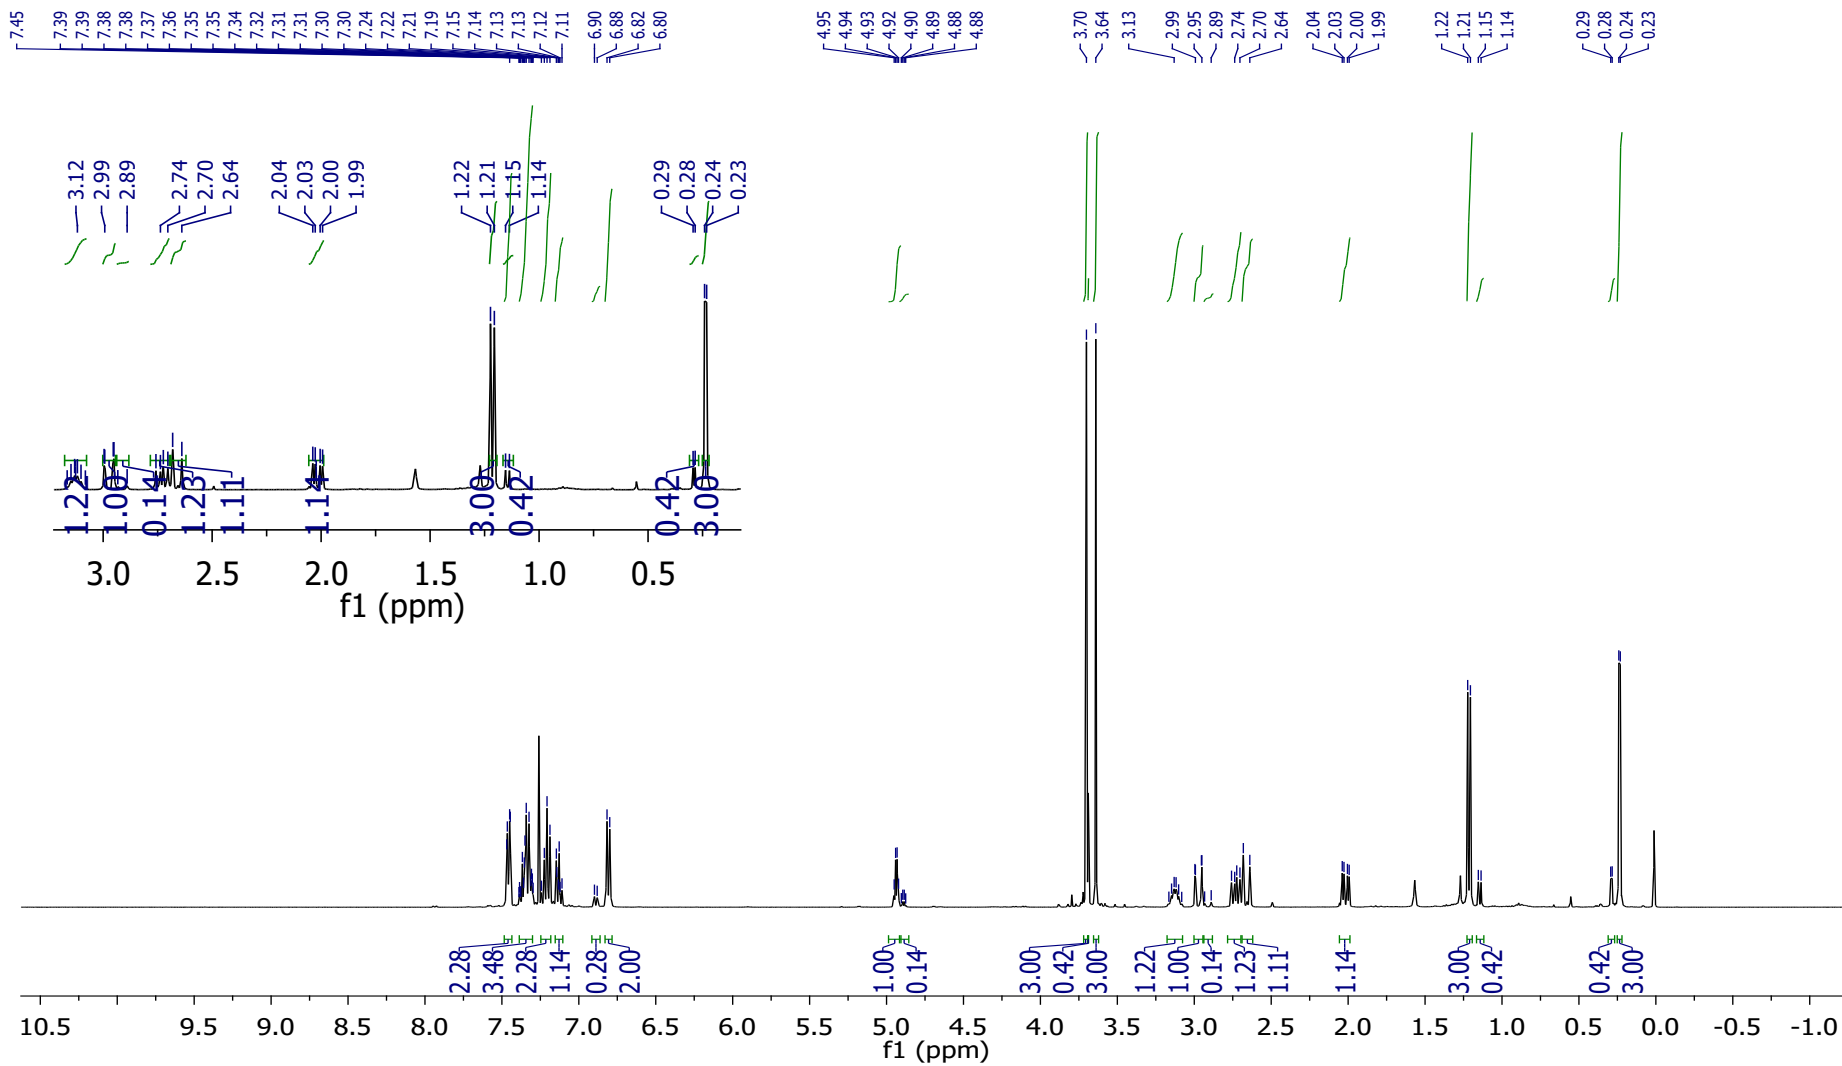

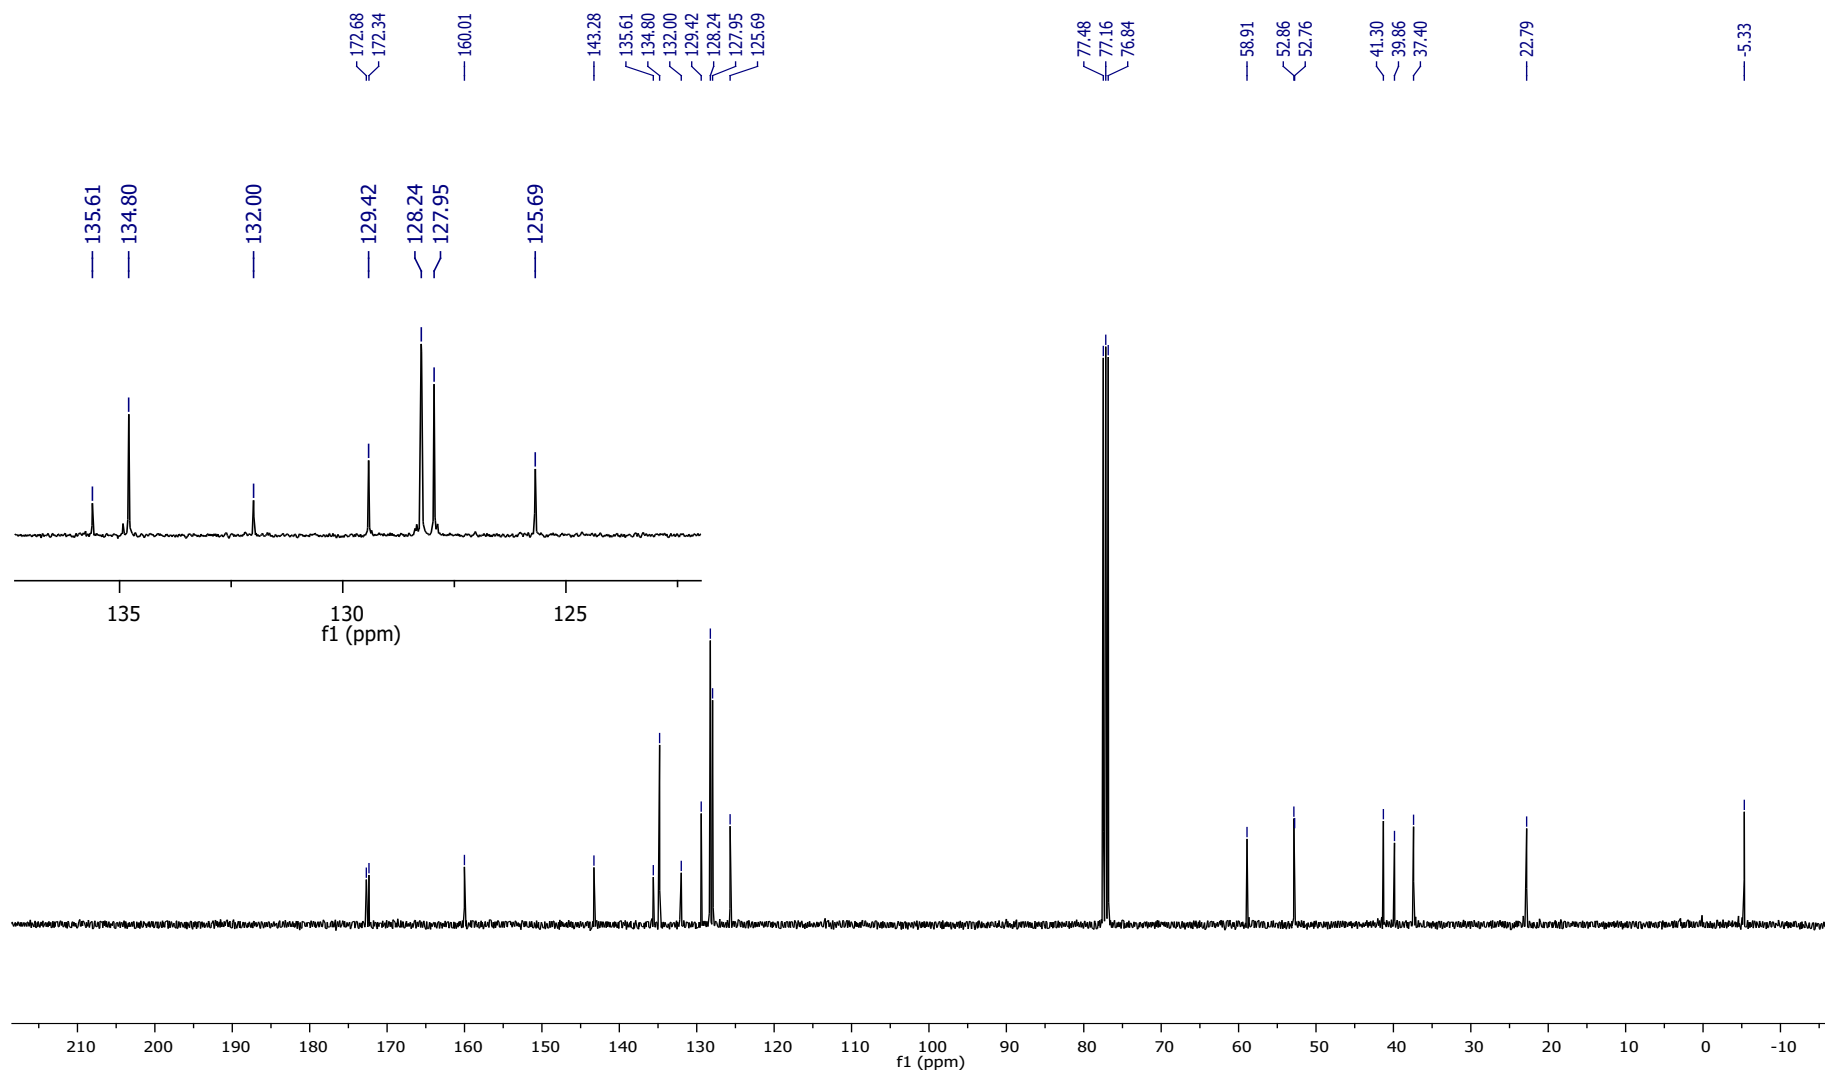

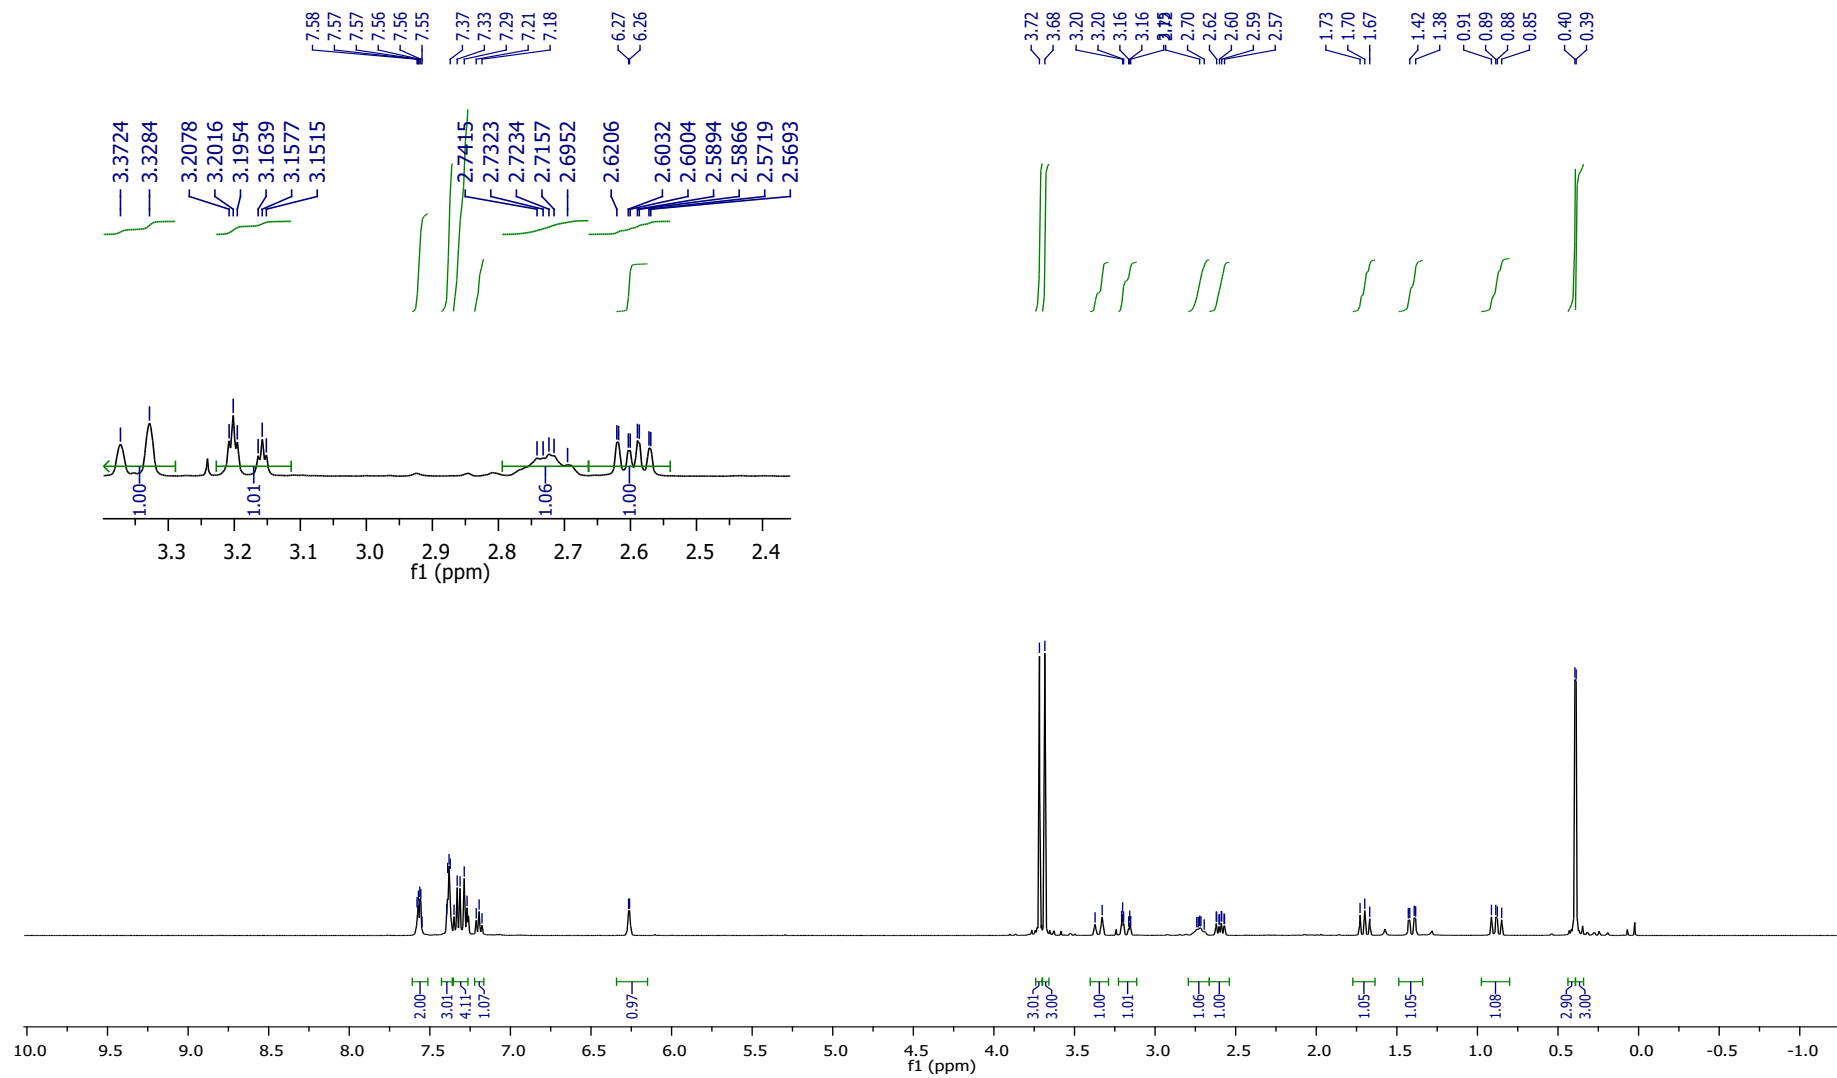



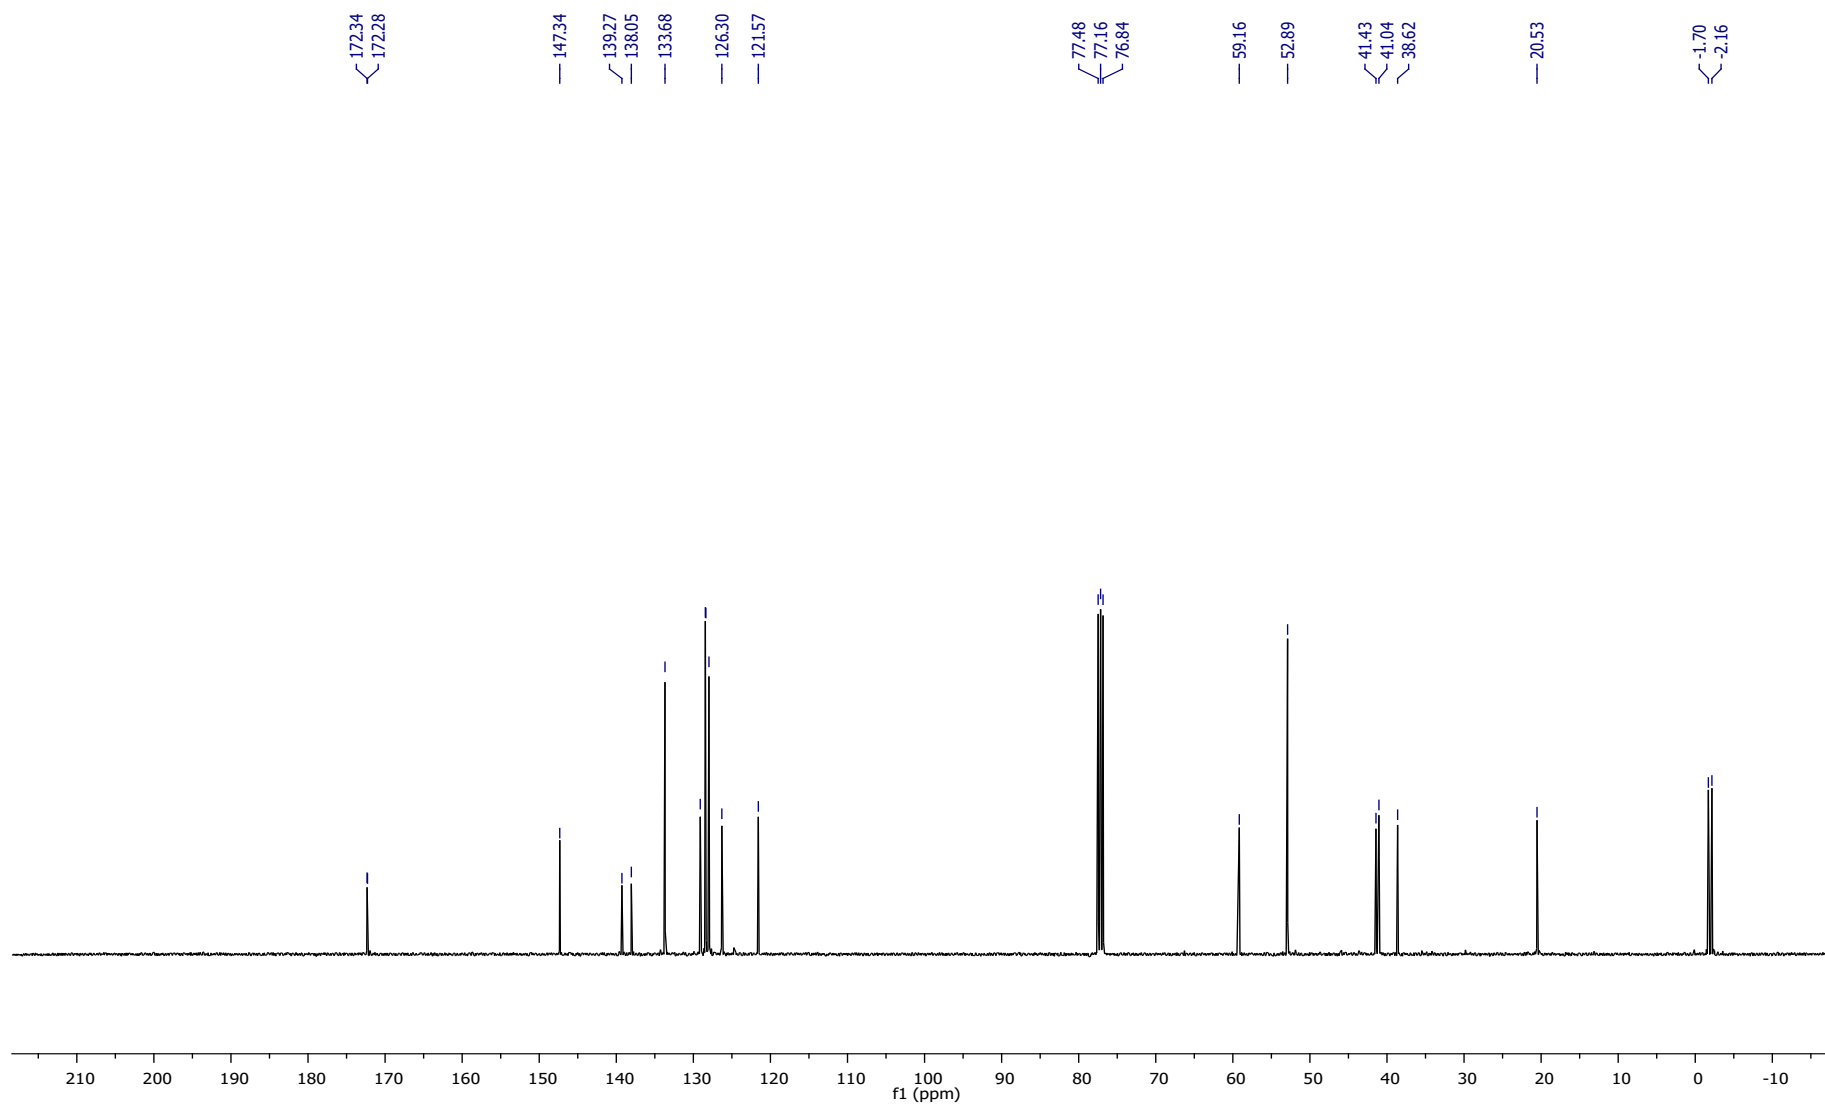

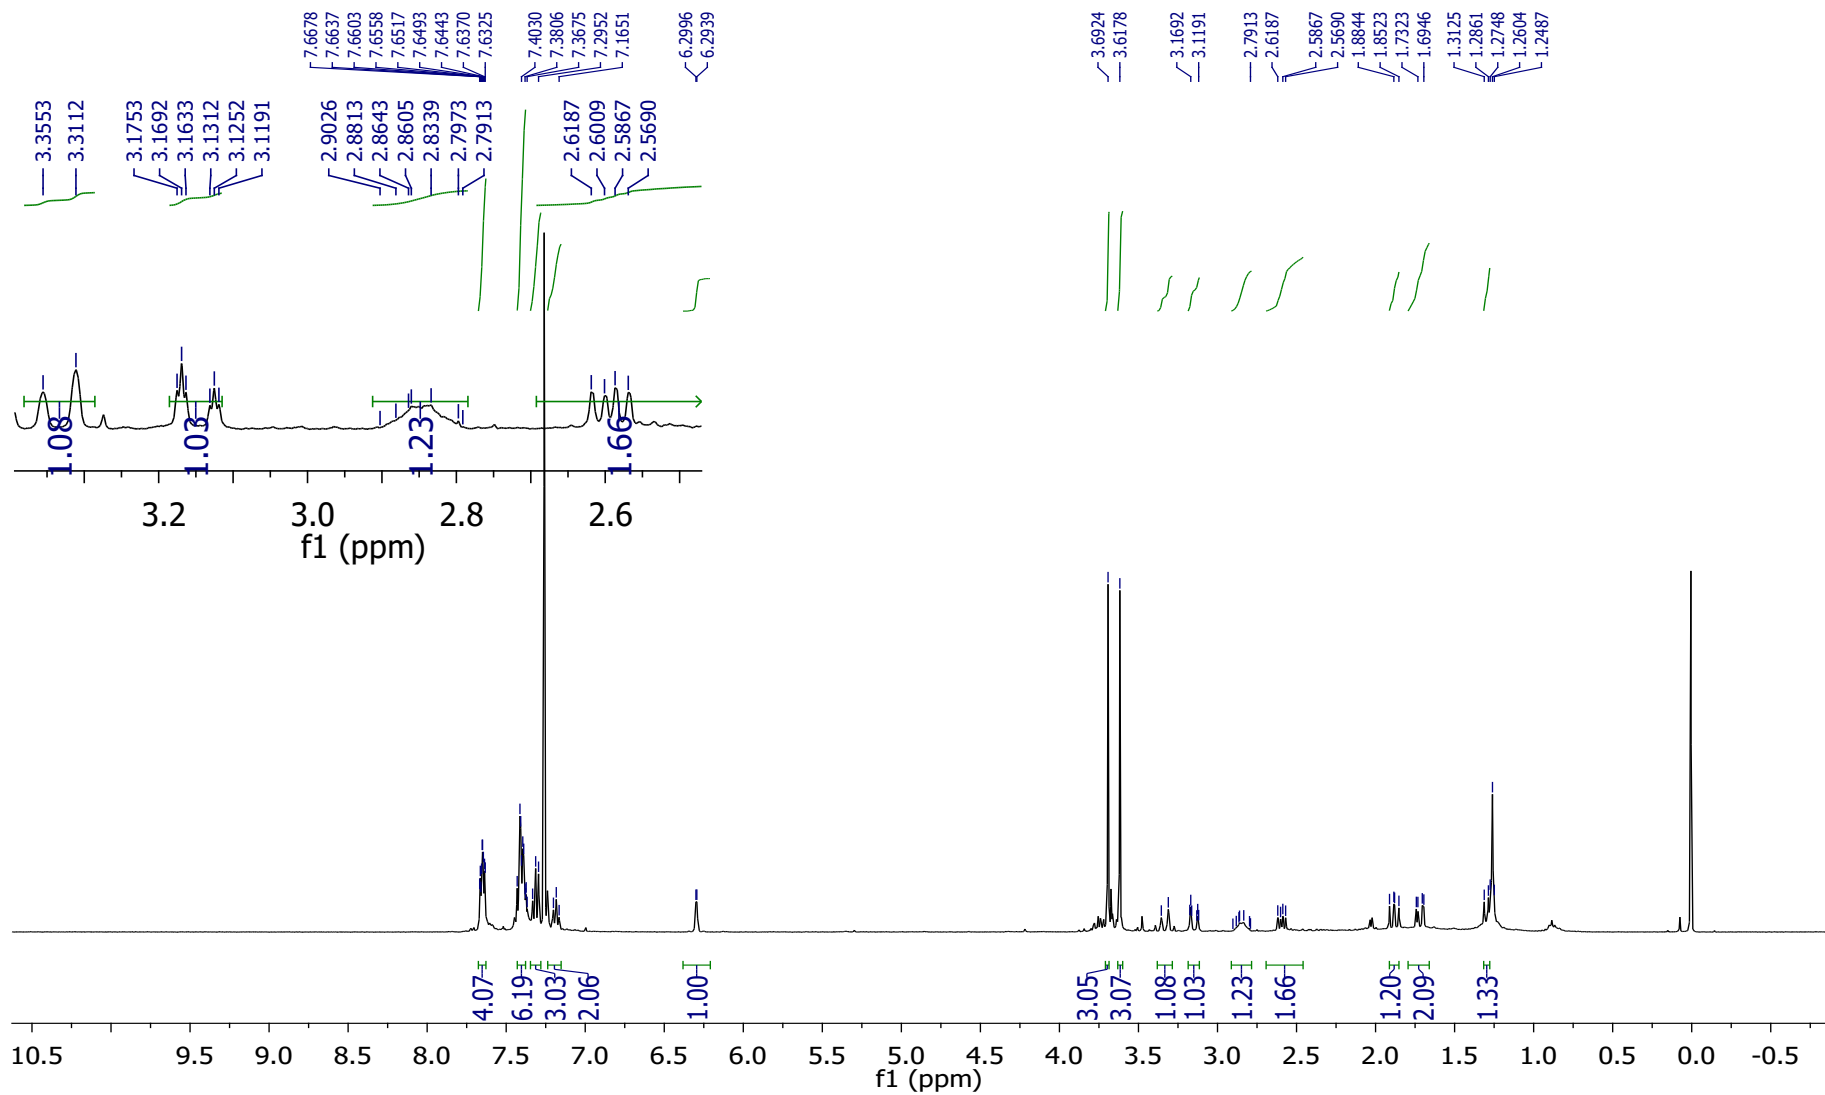

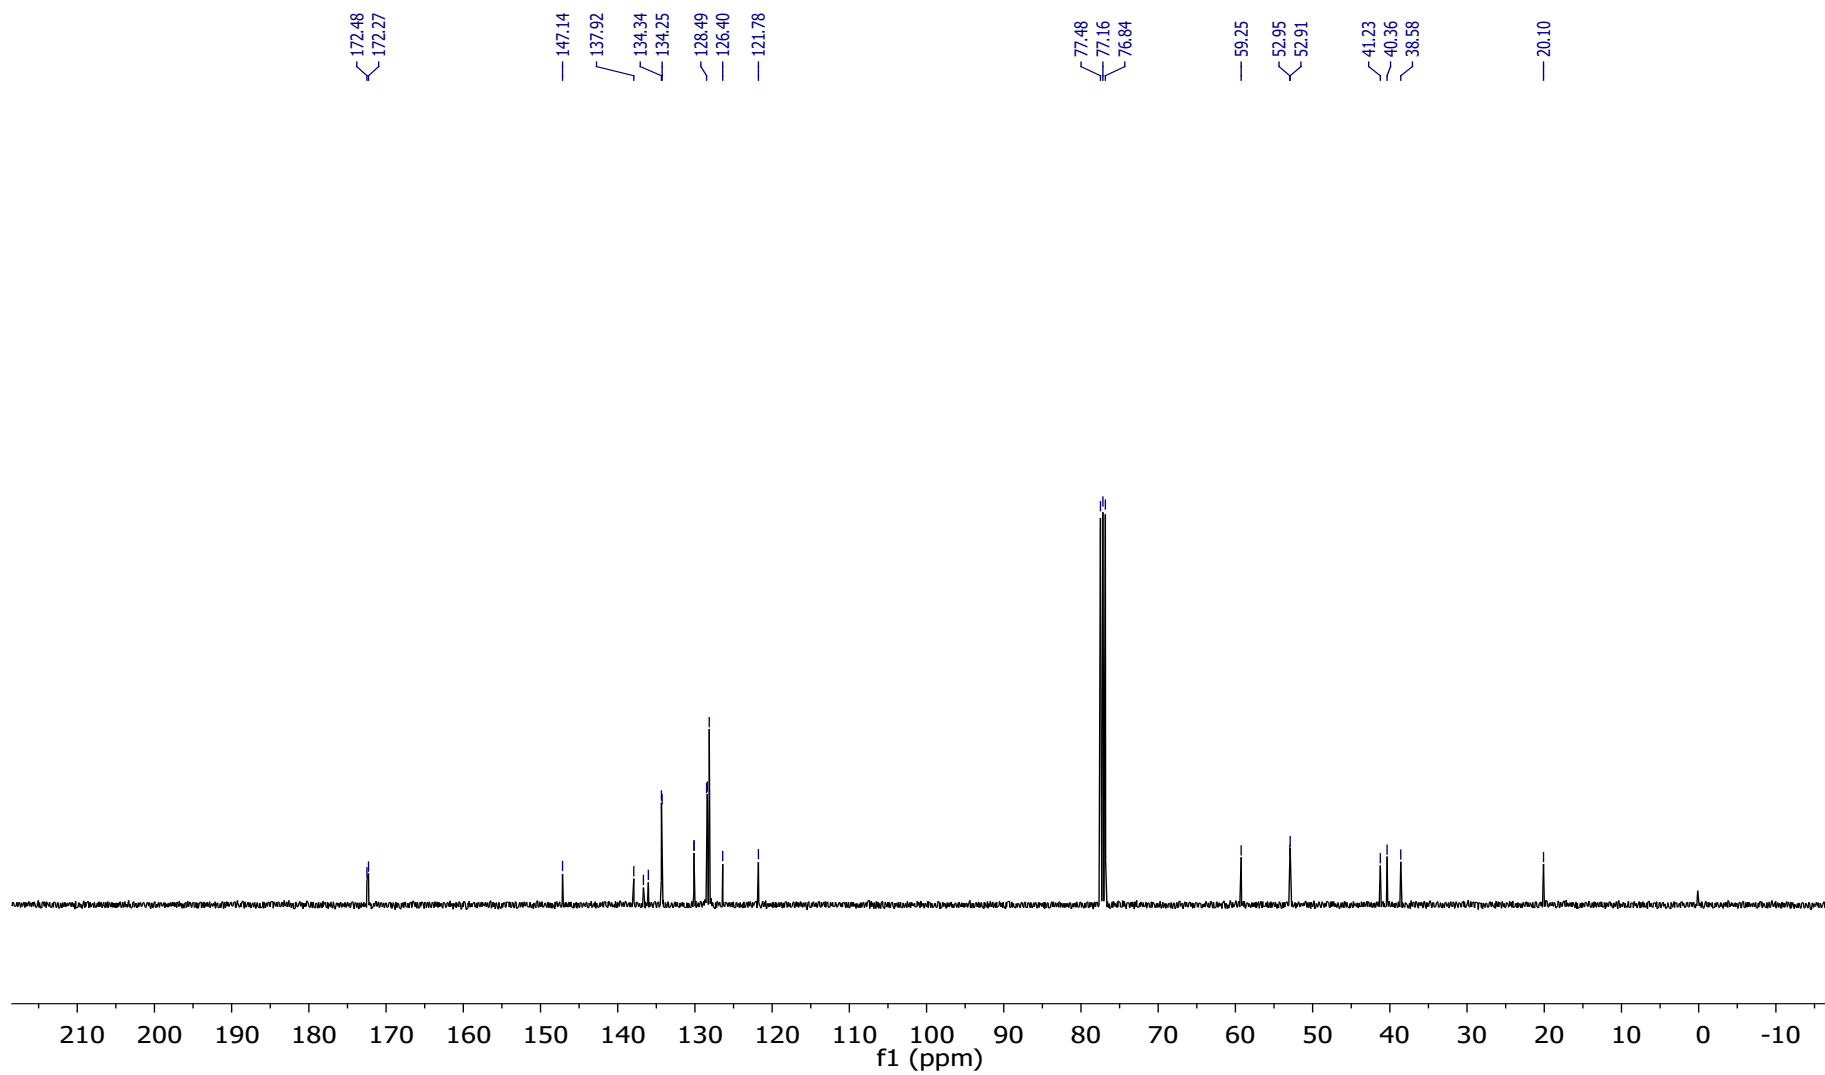

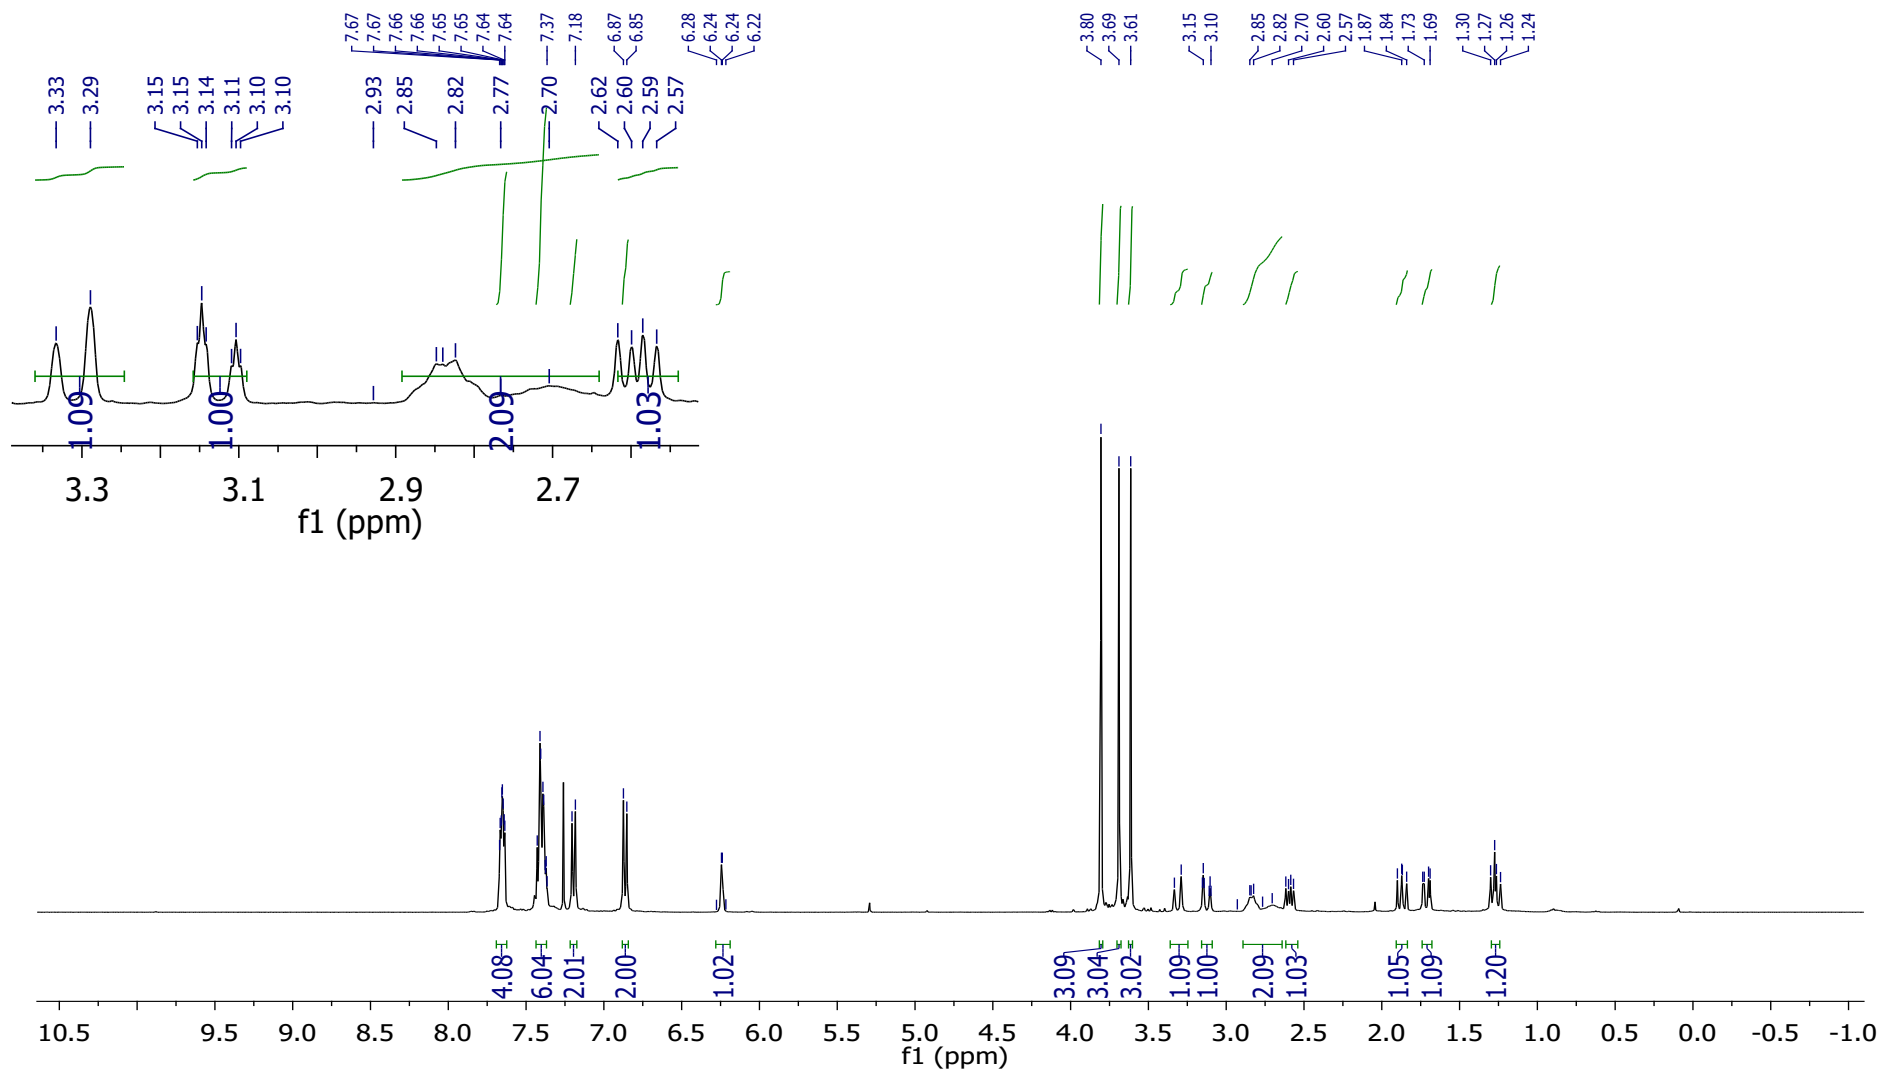

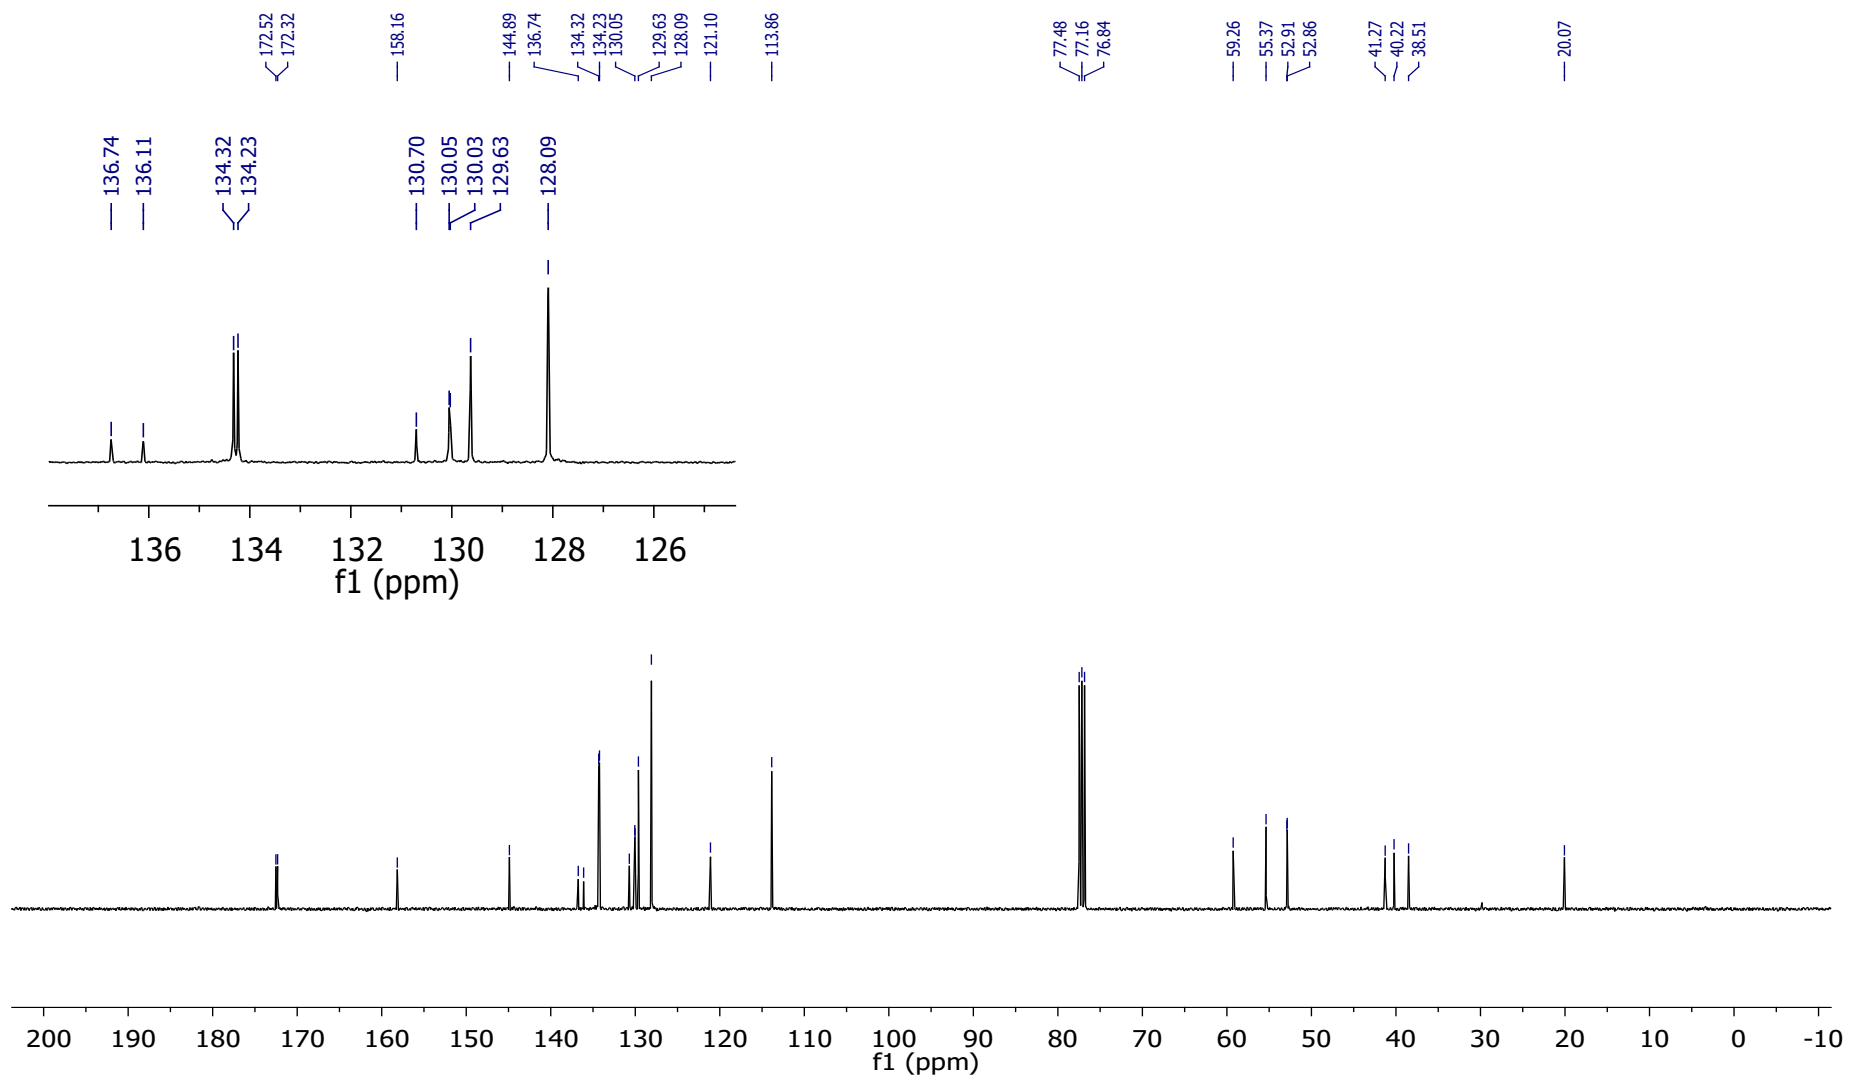

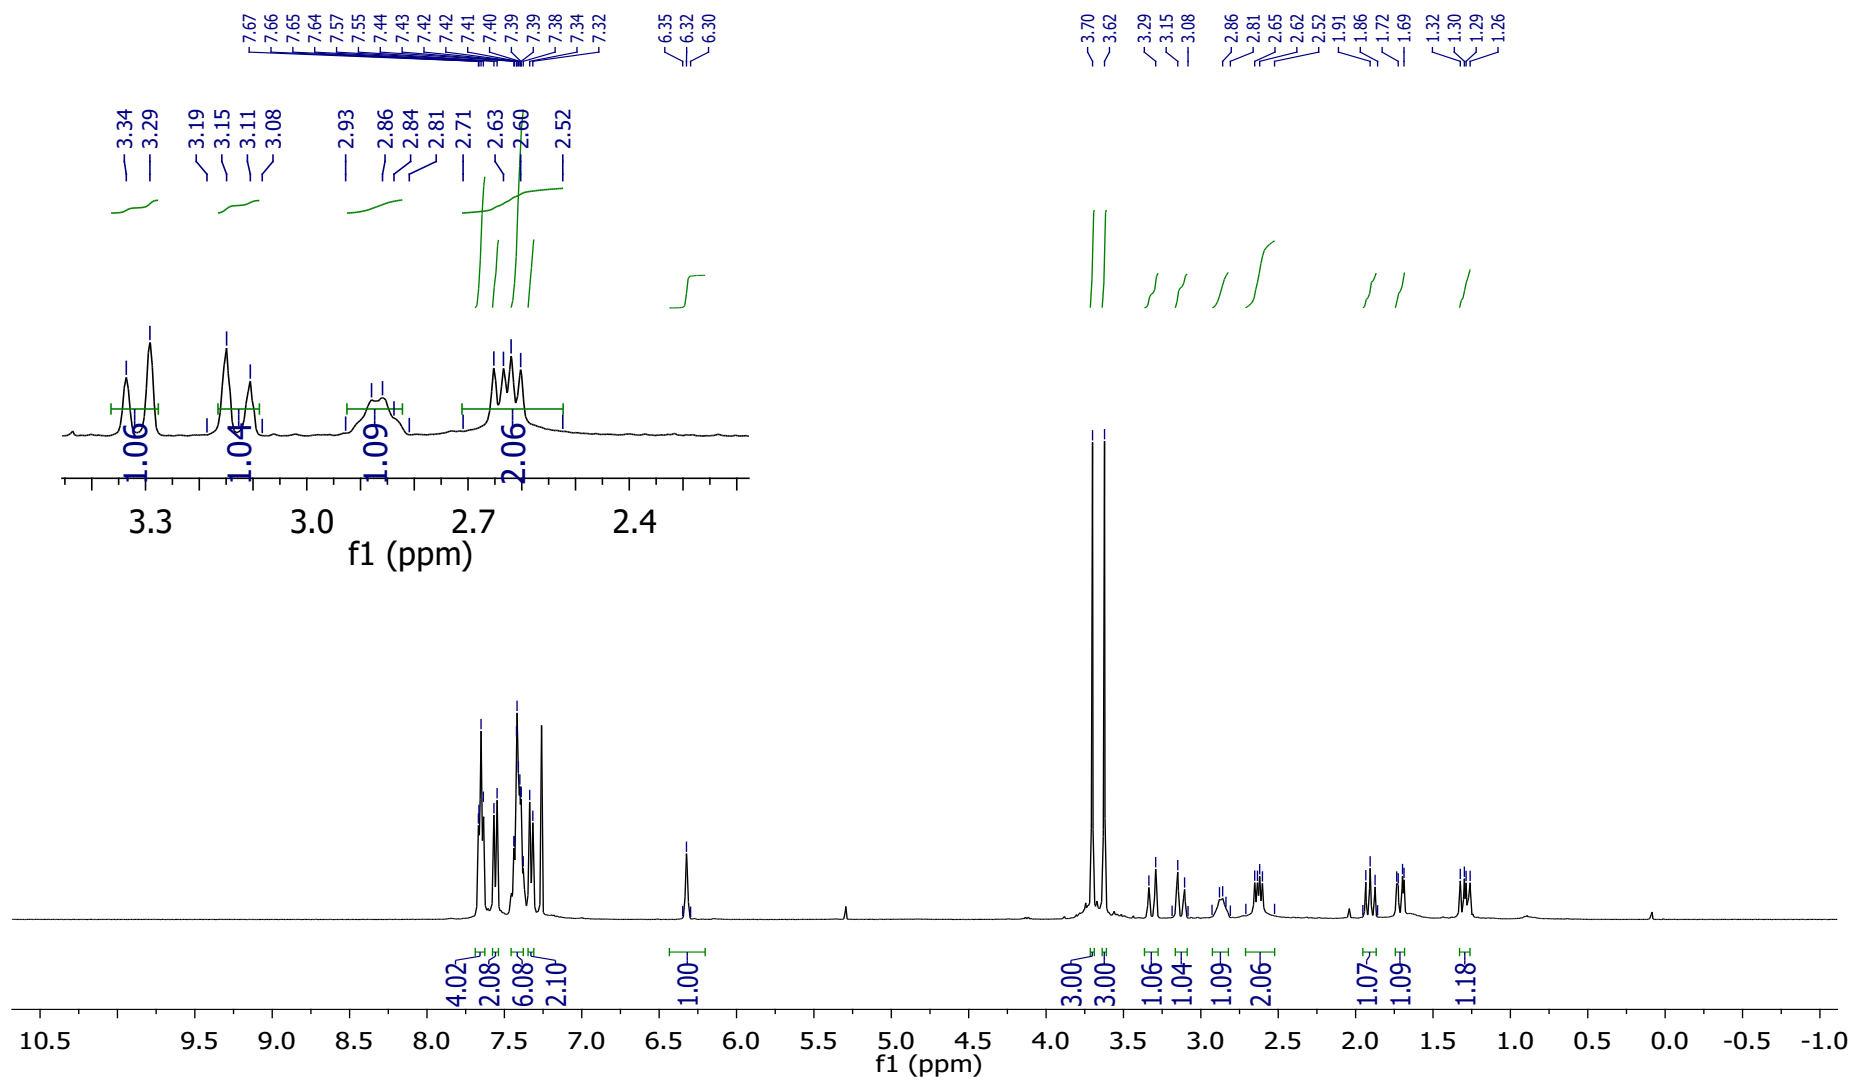

$^{13}\text{C}$  NMR (101 MHz,  $\text{CDCl}_3$ )  $\delta$  128.25 (d,  $J = 32.1$  Hz, 3H), 125.21 (t,  $J = 3.8$  Hz, 1H), 134.21 (s, 1H), 130.21 (s, 1H), 128.93 (s, 1H), 128.84 (s, 1H), 128.81 (s, 1H), 125.77 (s, 1H), 125.49 (s, 1H), 125.46 (s, 1H), 125.26 (s, 1H), 123.07 (s, 1H), 120.78 (s, 1H), 77.48 (s, 3H), 77.16 (s, 3H), 76.84 (s, 3H), 59.17 (s, 1H), 53.03 (s, 1H), 52.98 (s, 1H), 41.13 (s, 1H), 40.55 (s, 1H), 38.66 (s, 1H), 20.06 (s, 1H).

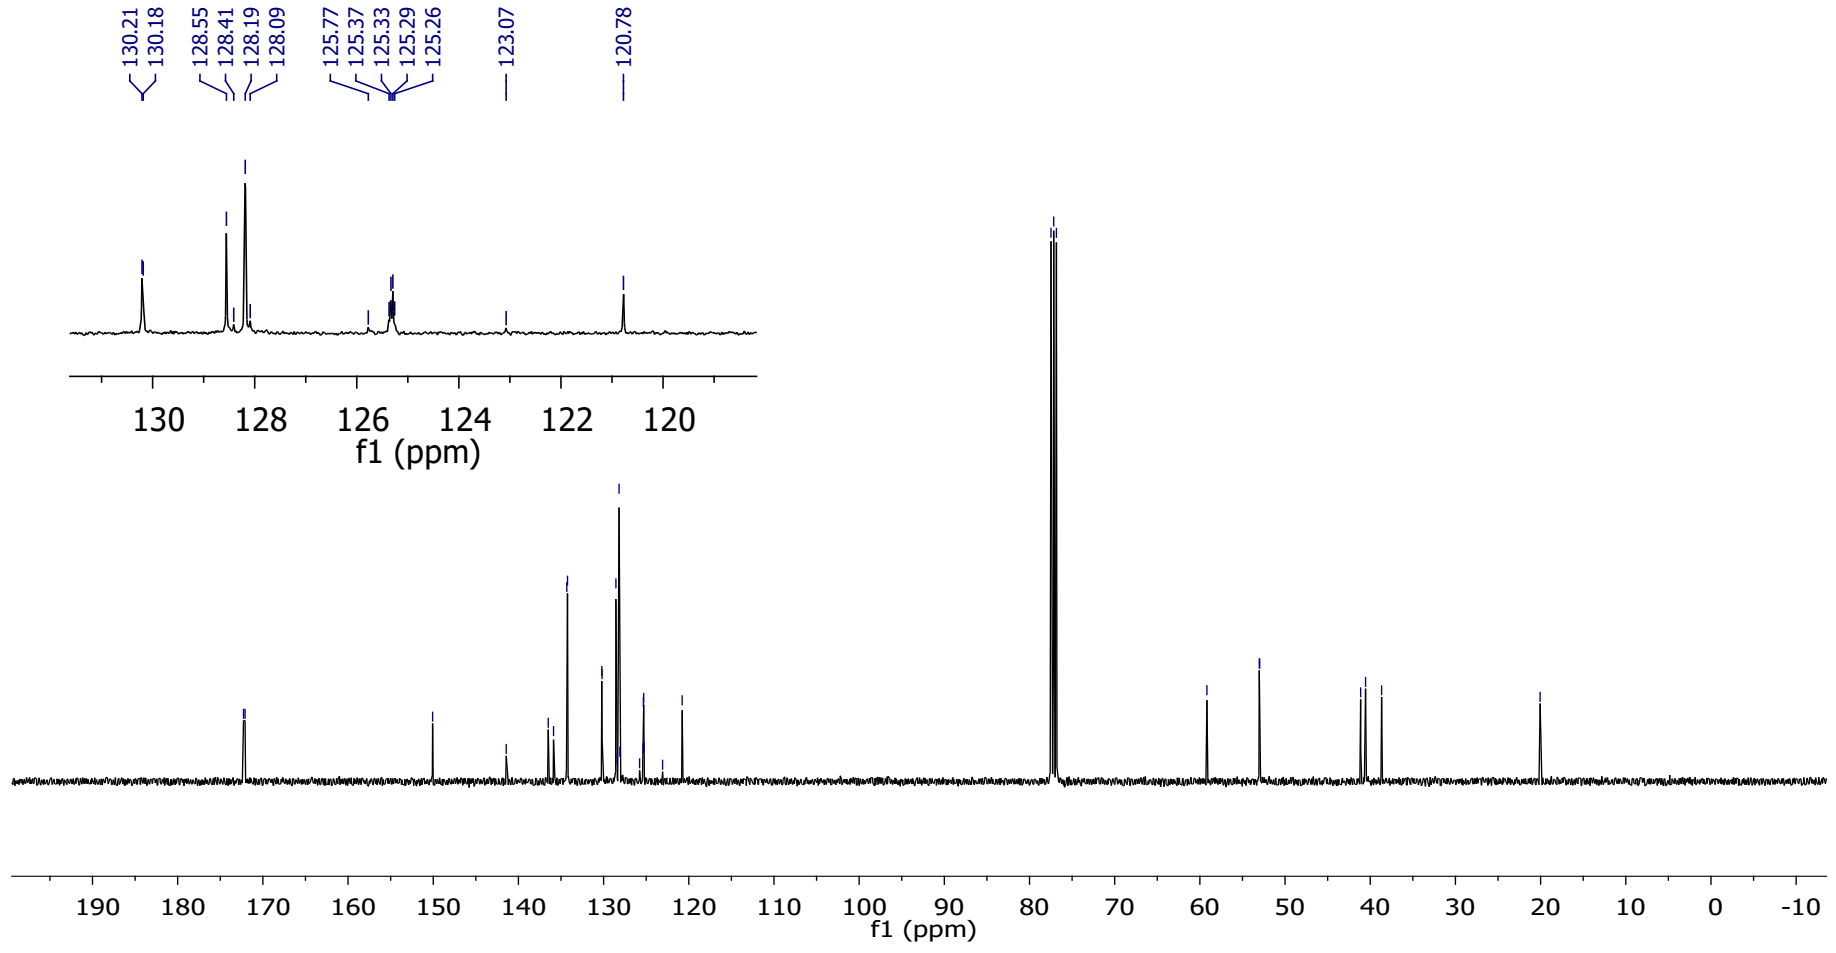

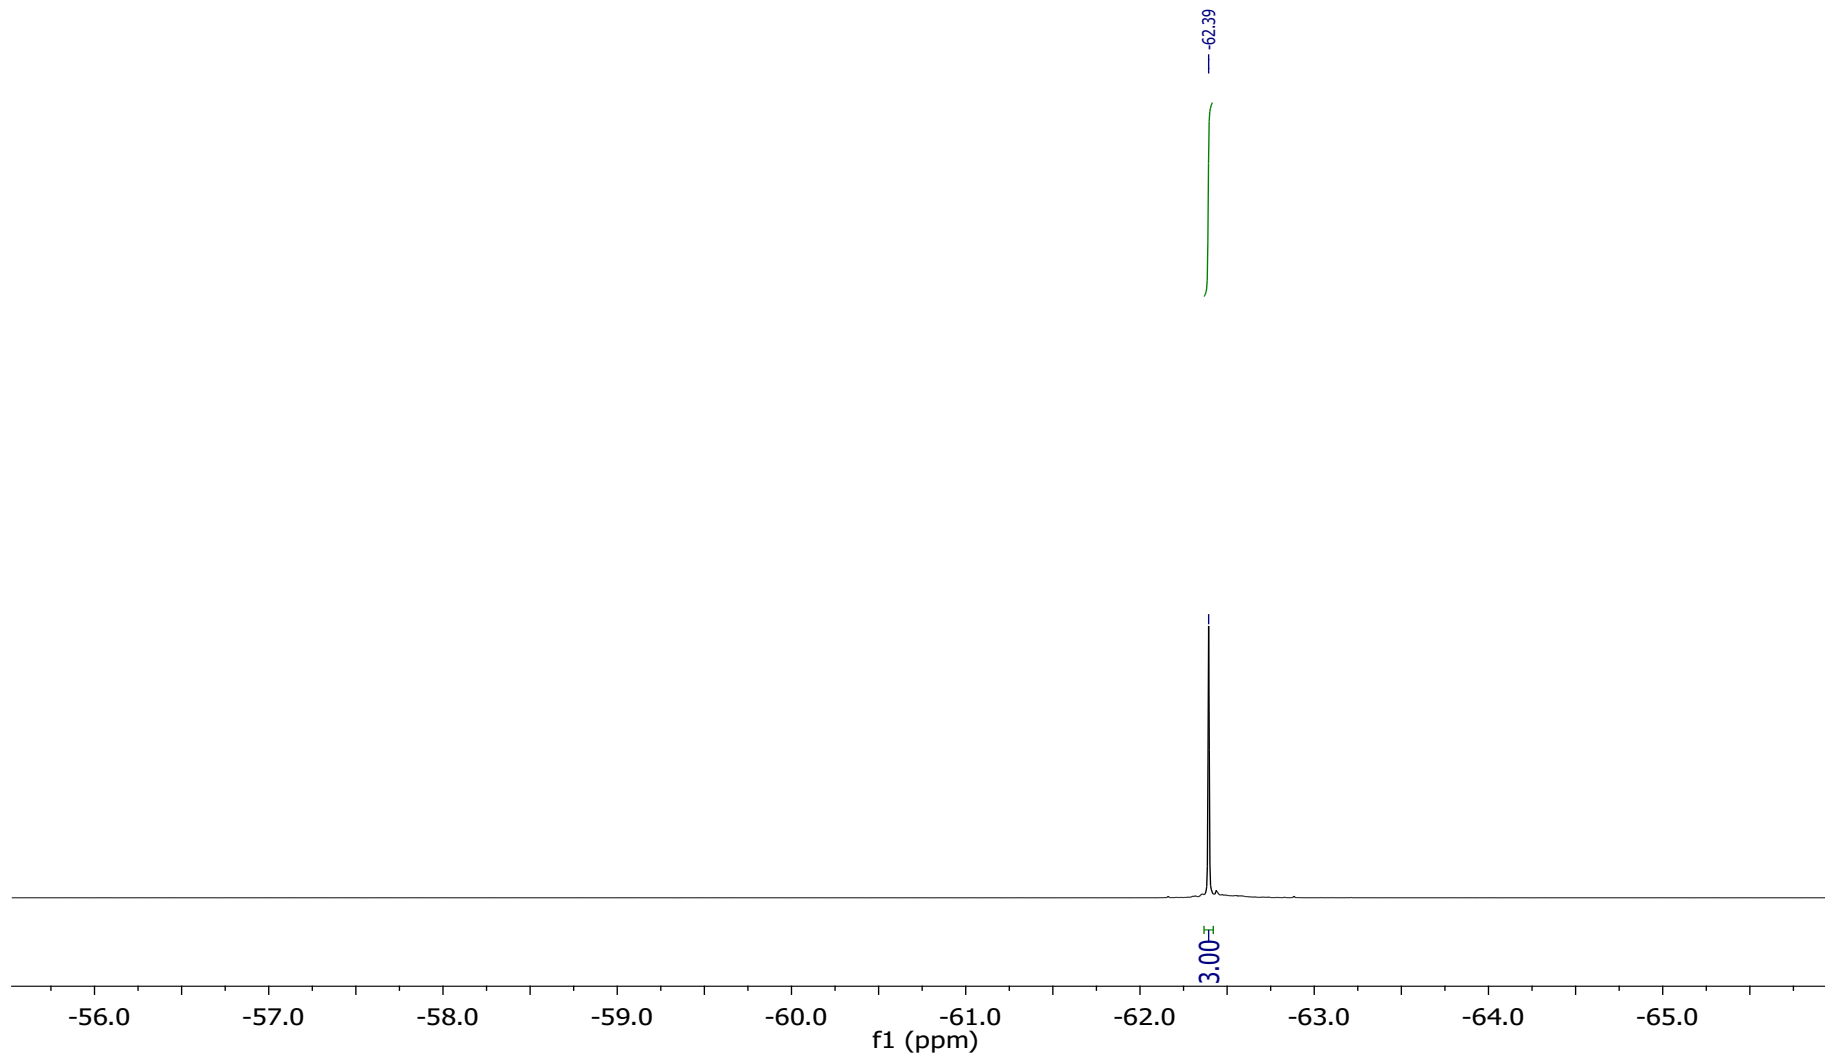

S152



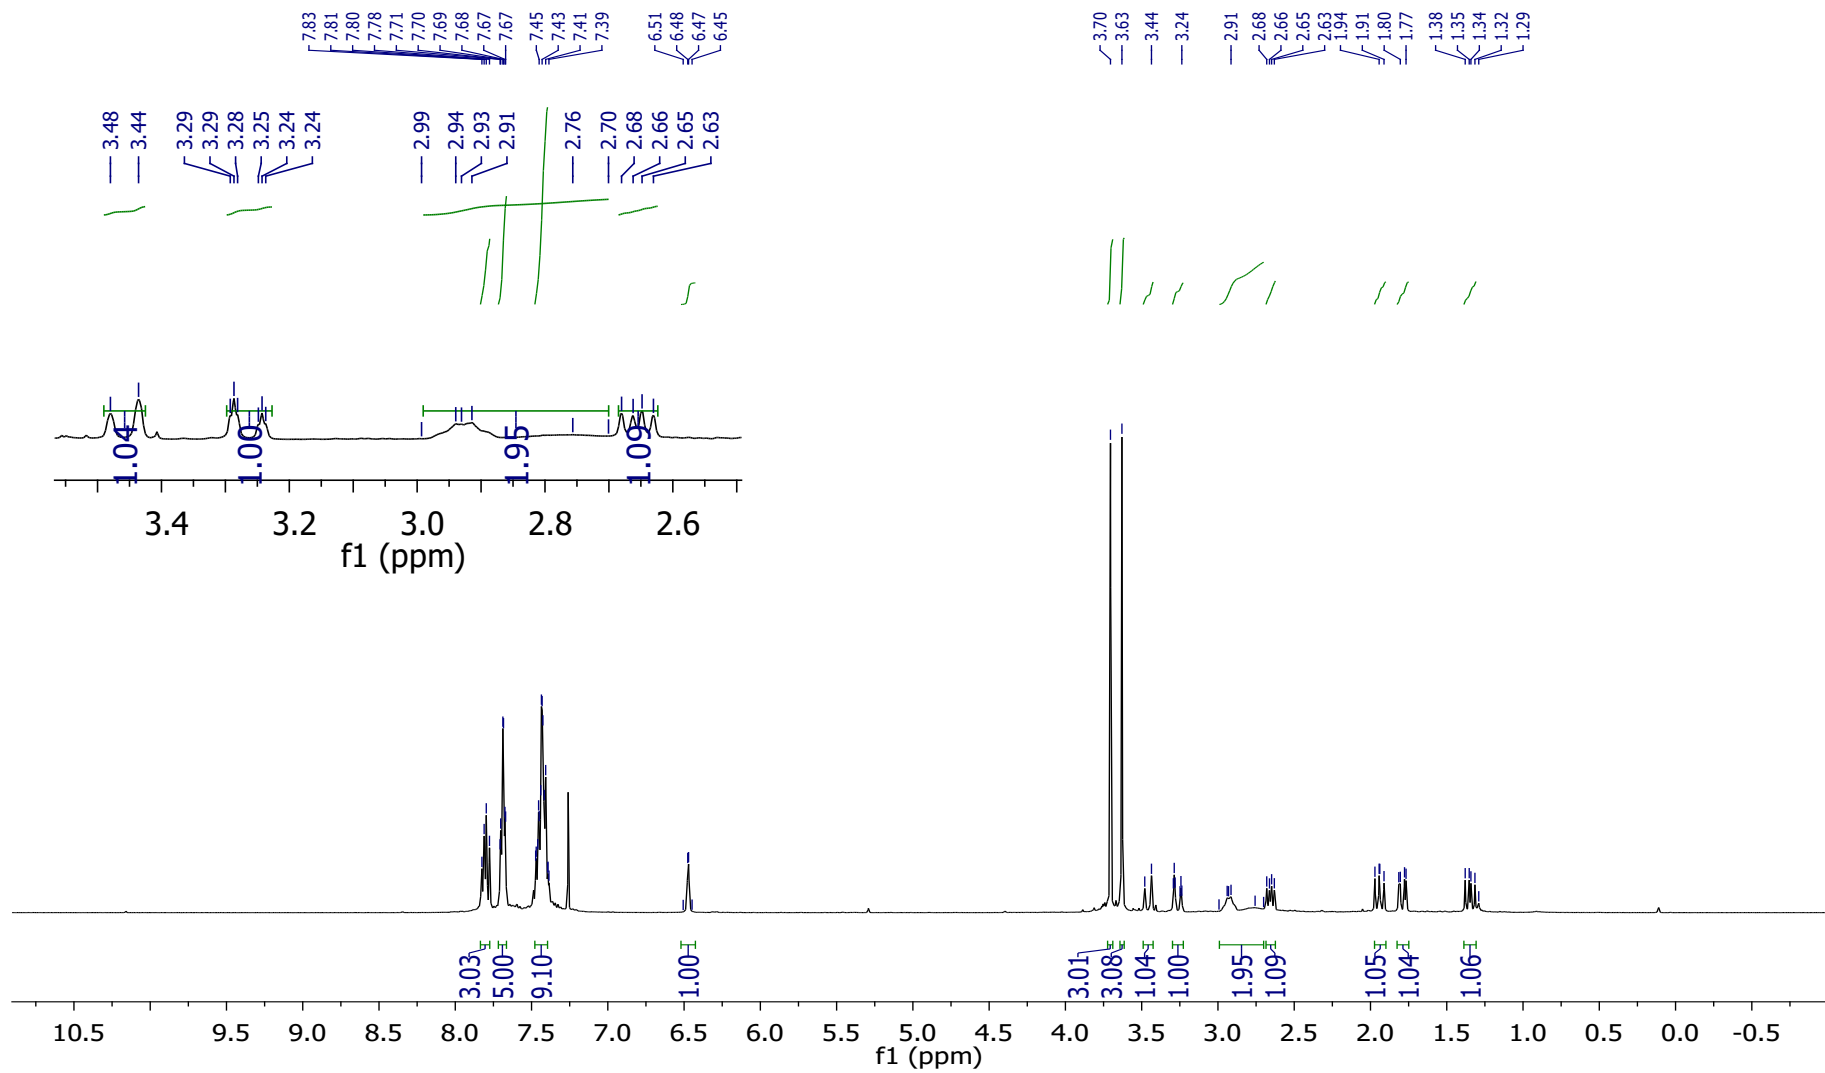

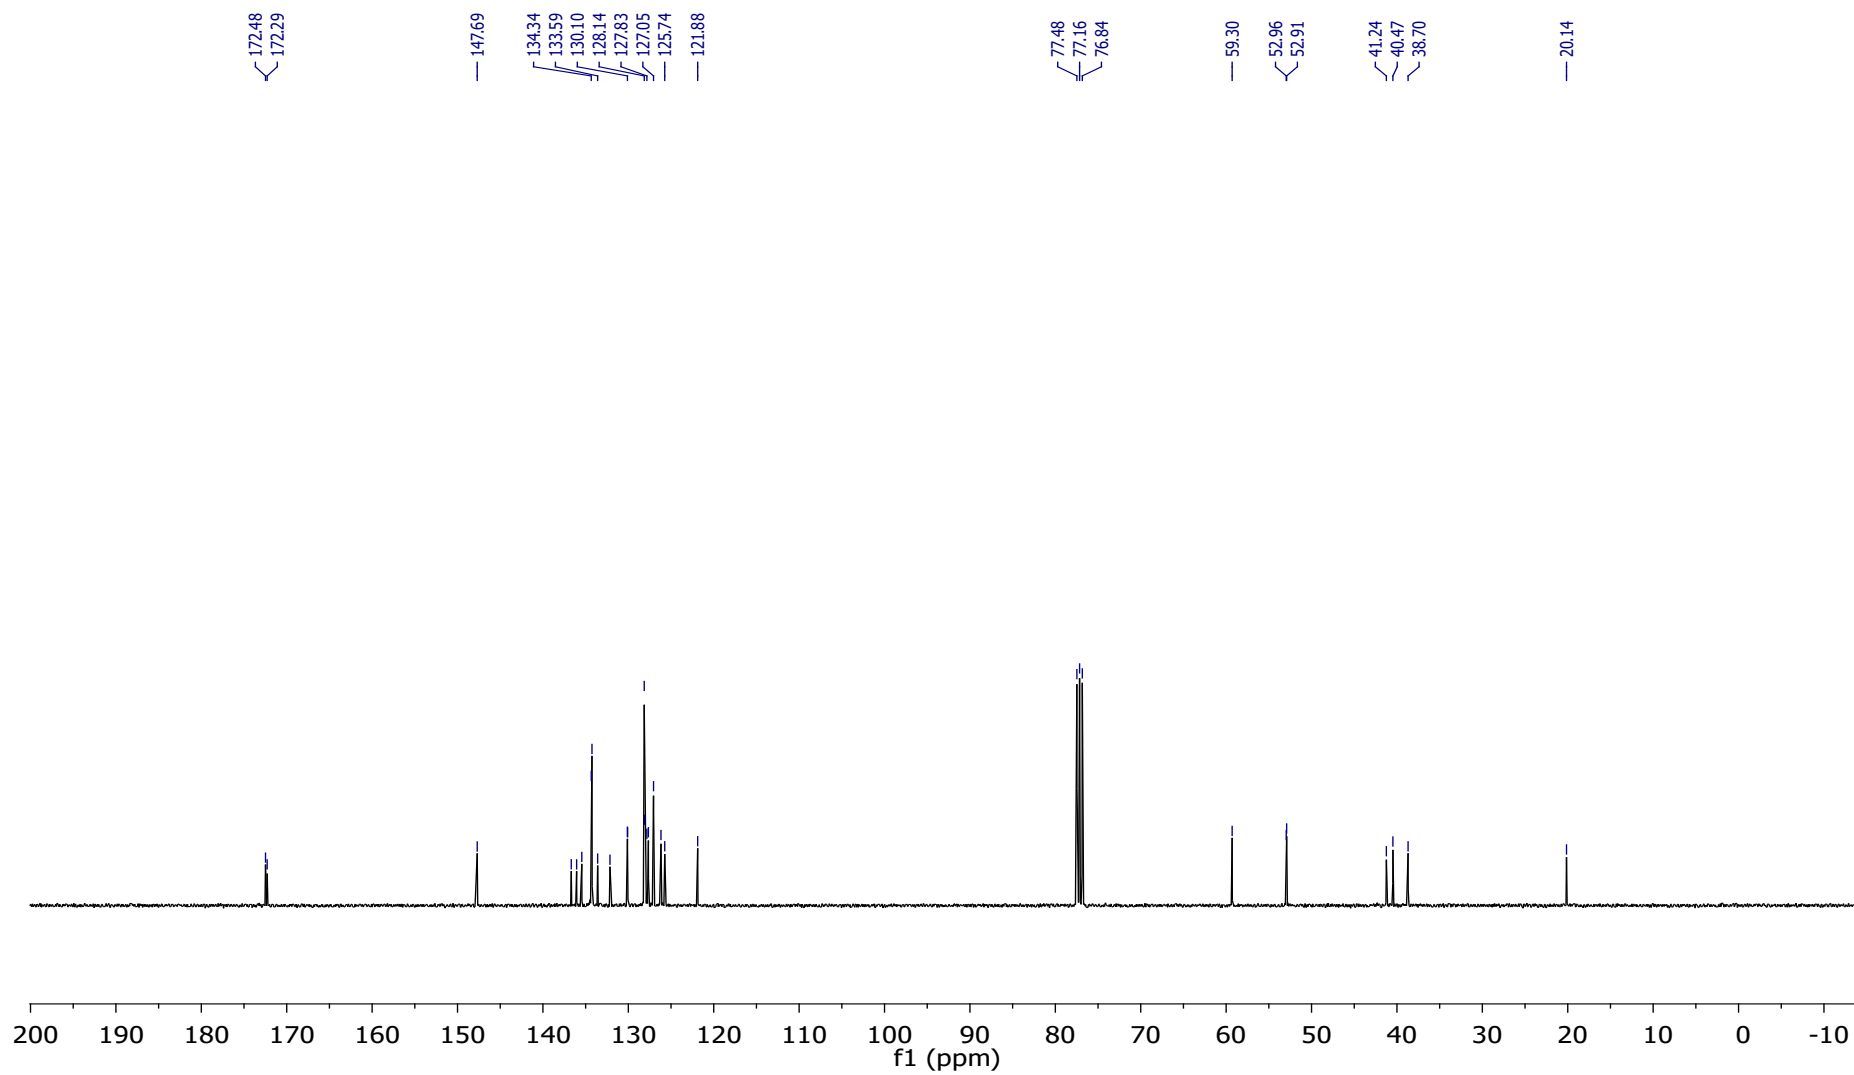

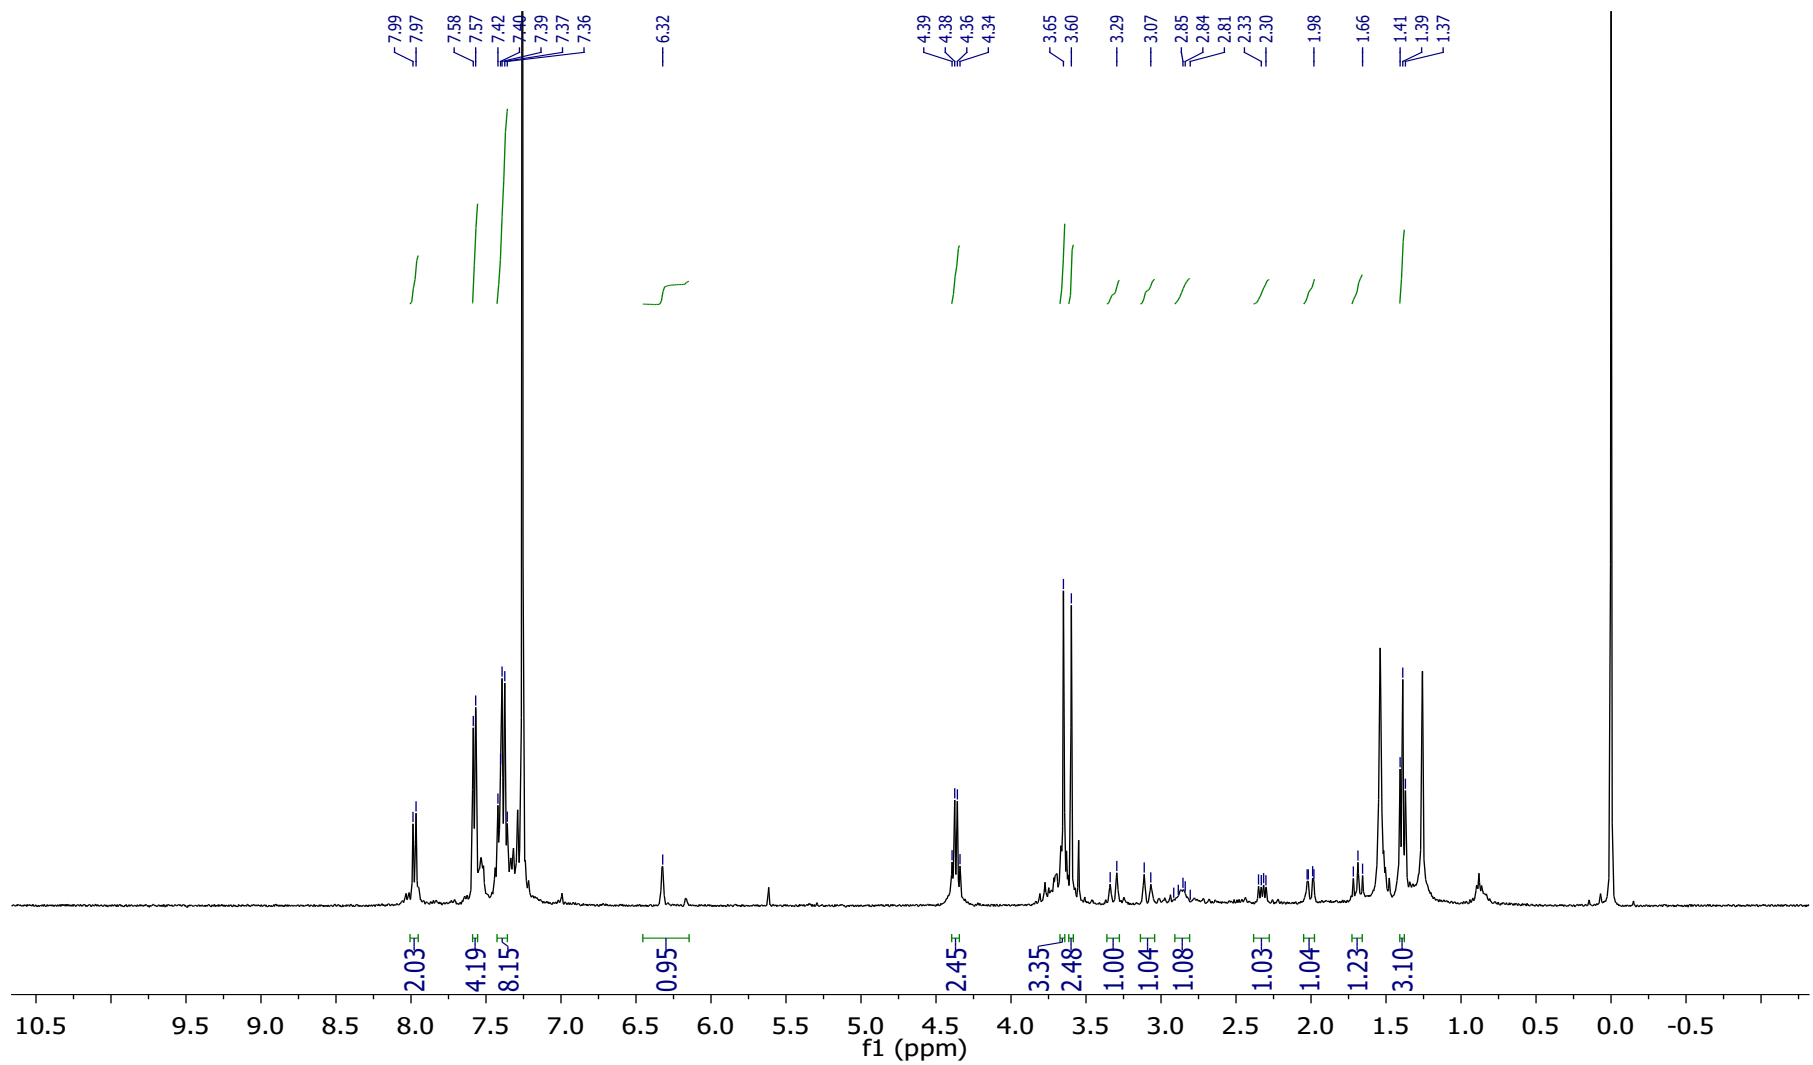

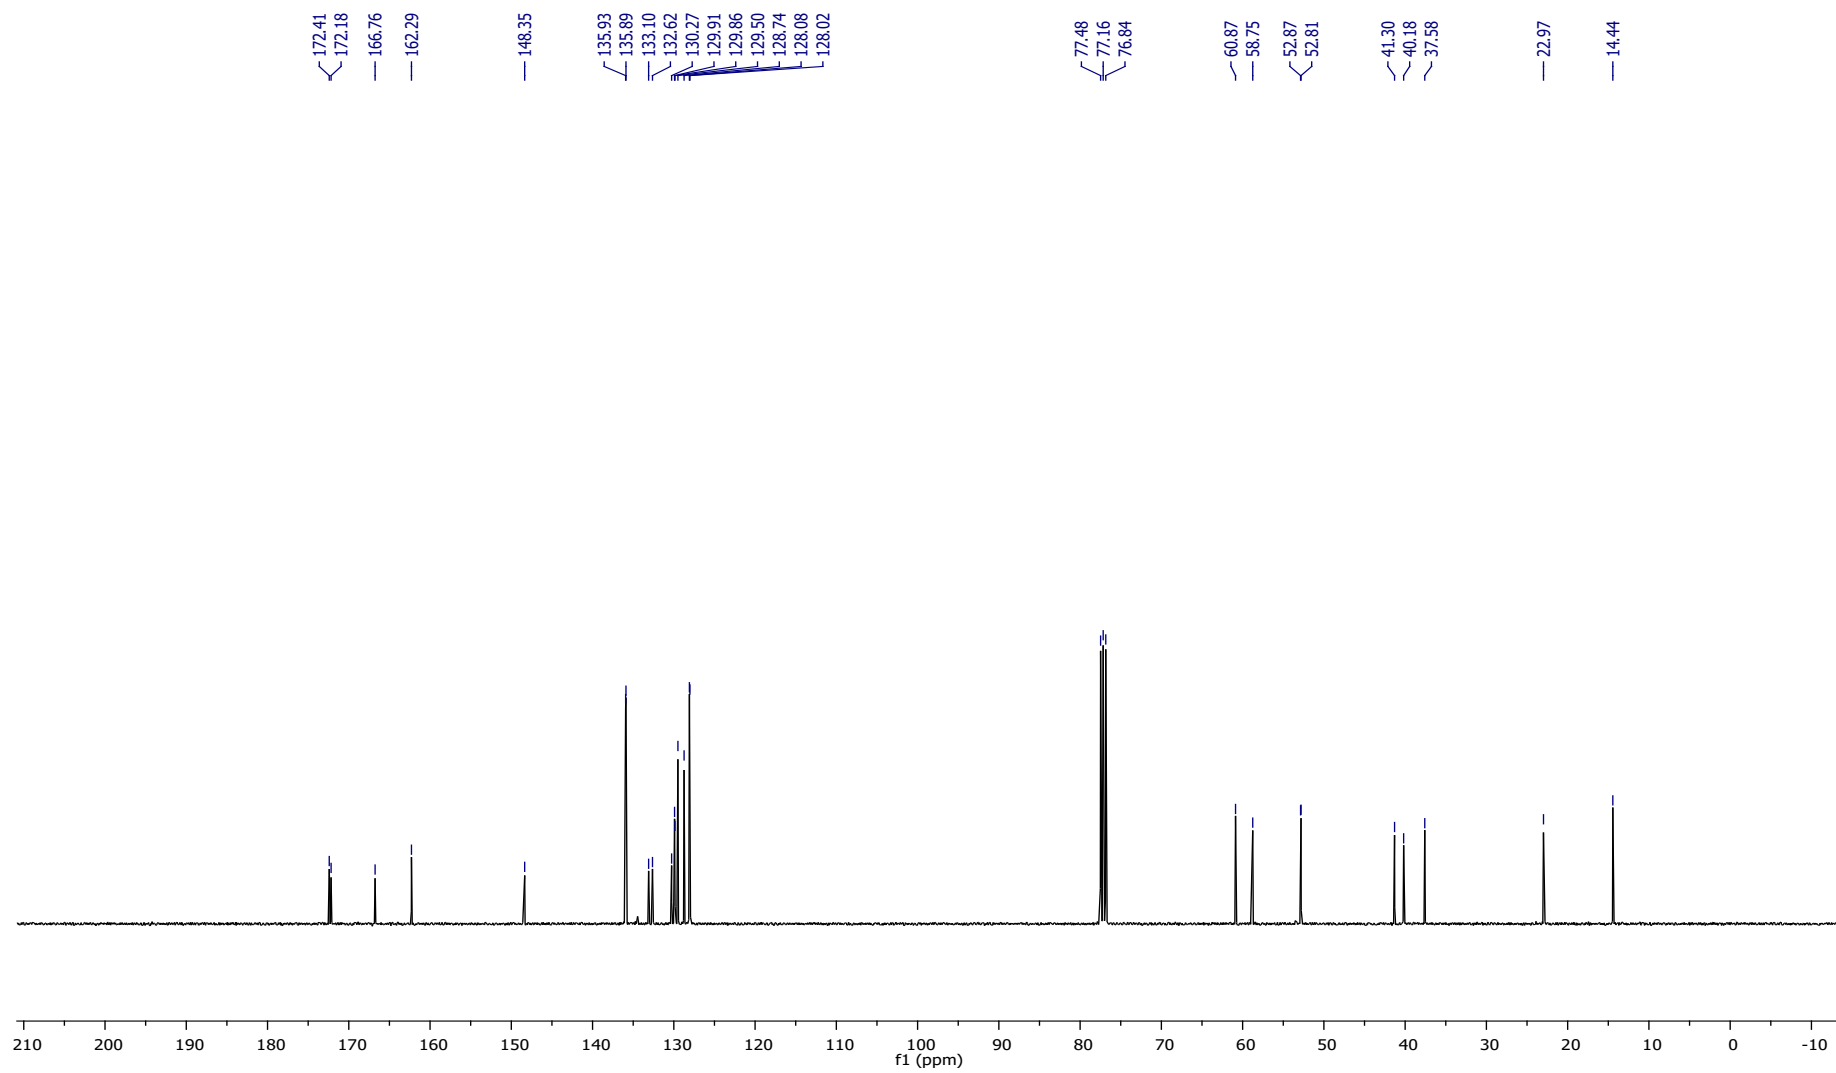

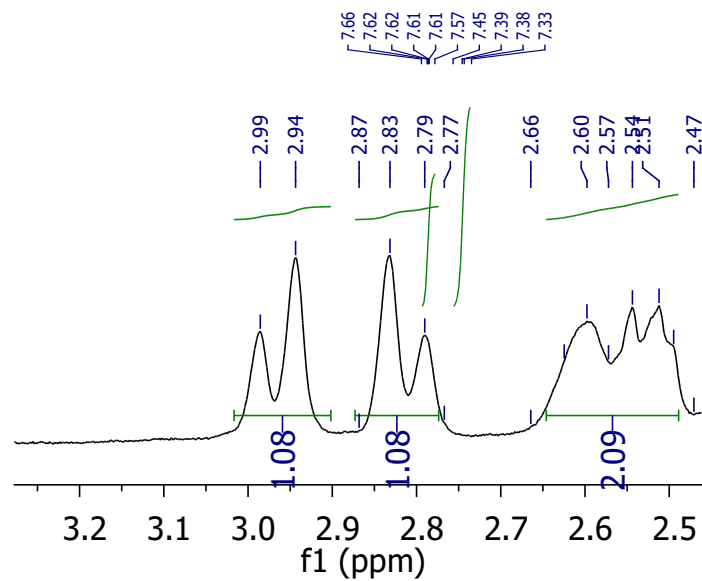

5.26  
5.21  
5.17

3.69  
3.62  
2.83  
2.62  
2.60  
2.57  
2.54  
2.51  
2.49  
2.47  
1.83  
1.80  
1.77  
1.56  
1.37  
1.30  
1.27  
1.23  
1.15  
1.12  
1.09  
0.96  
0.89  
0.82

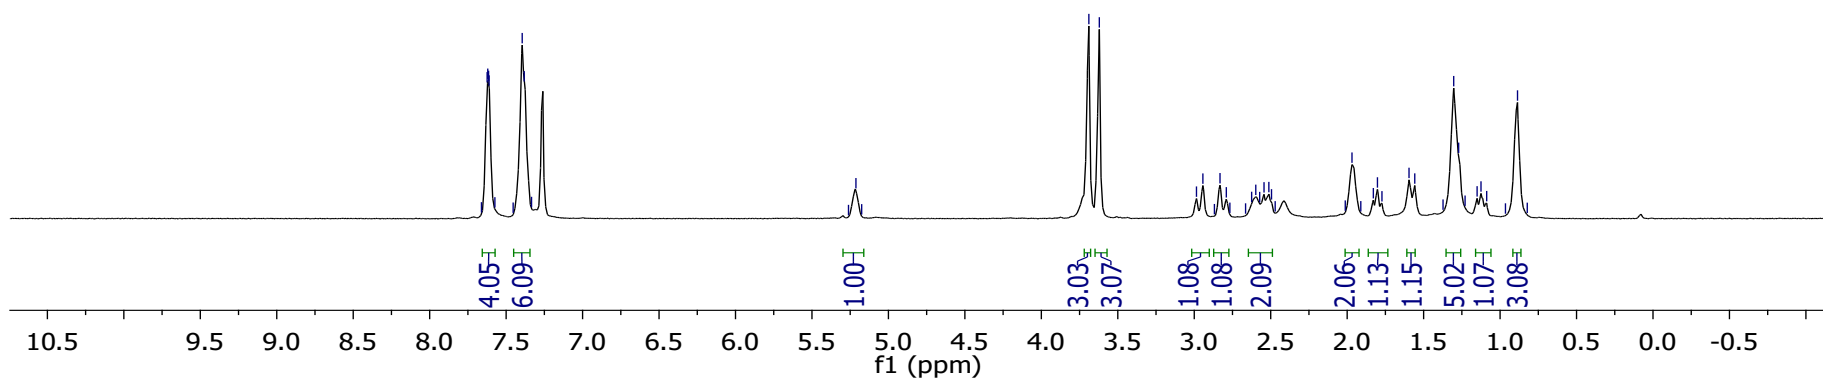

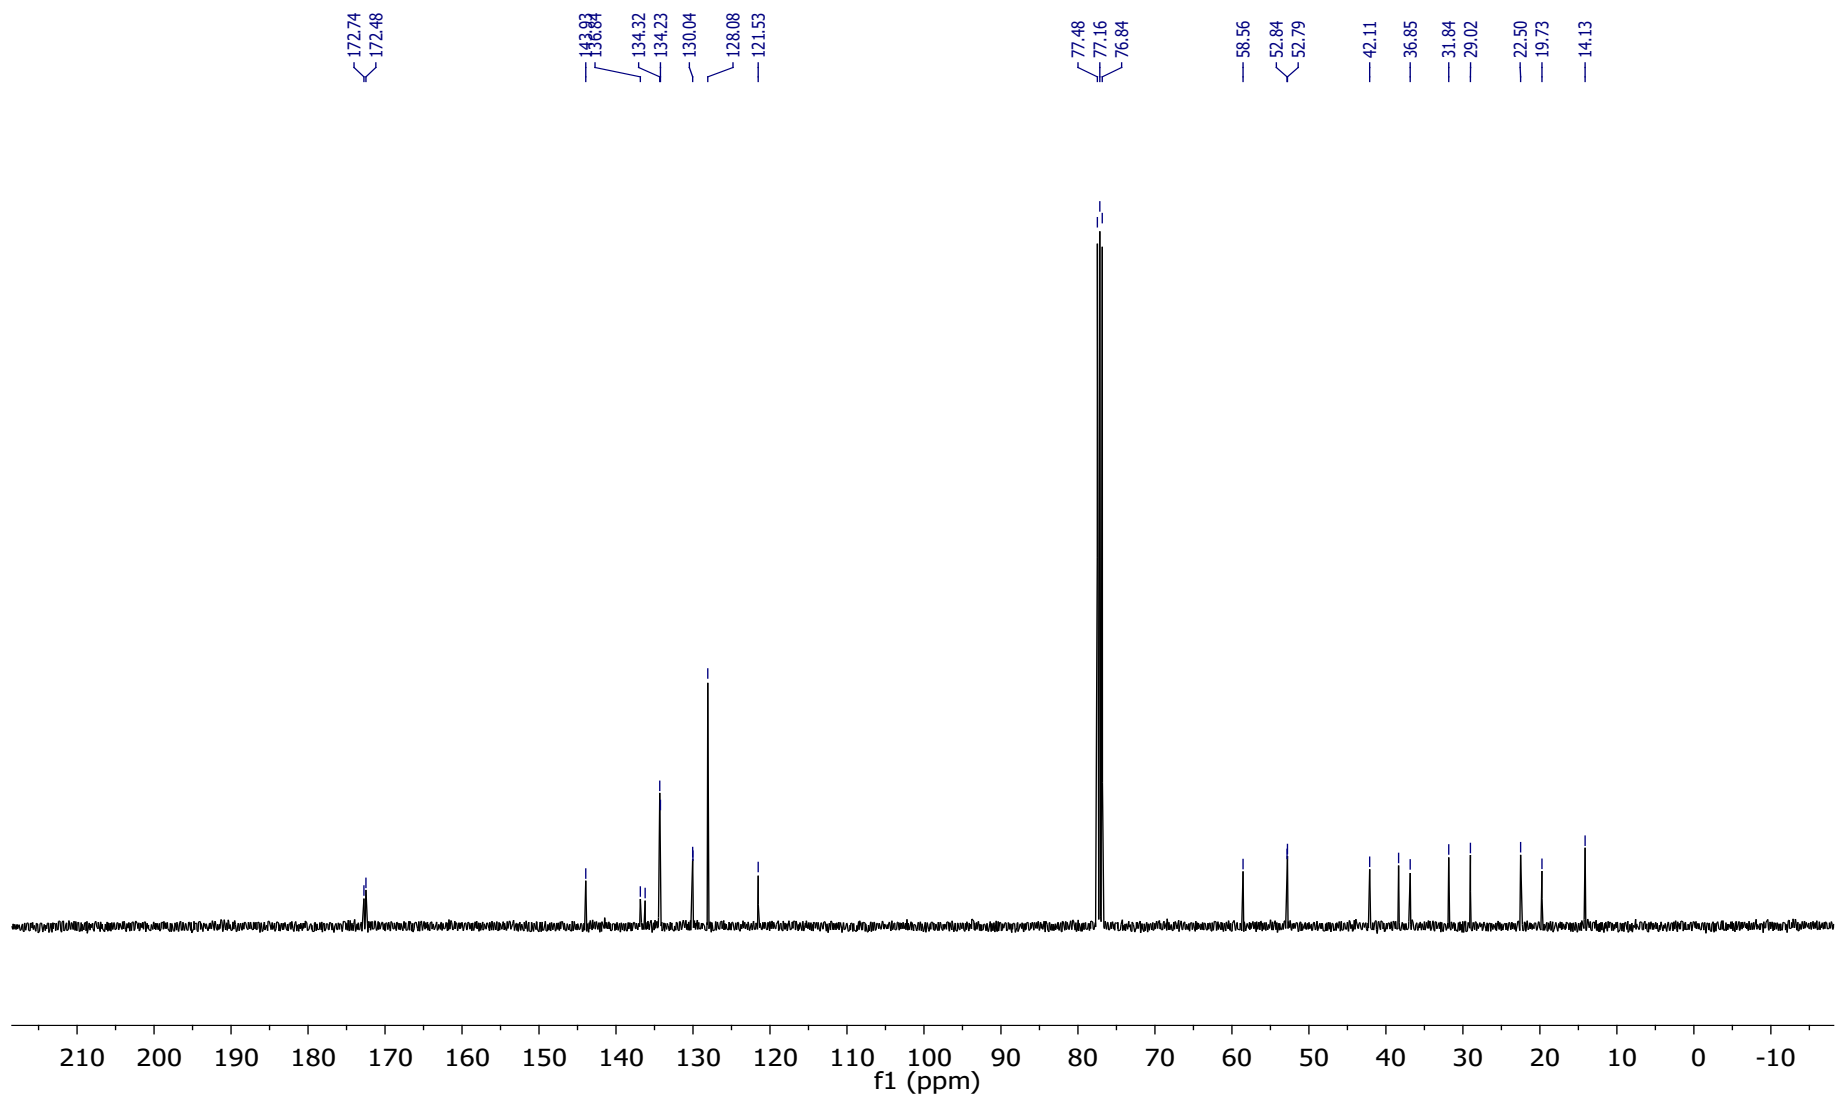

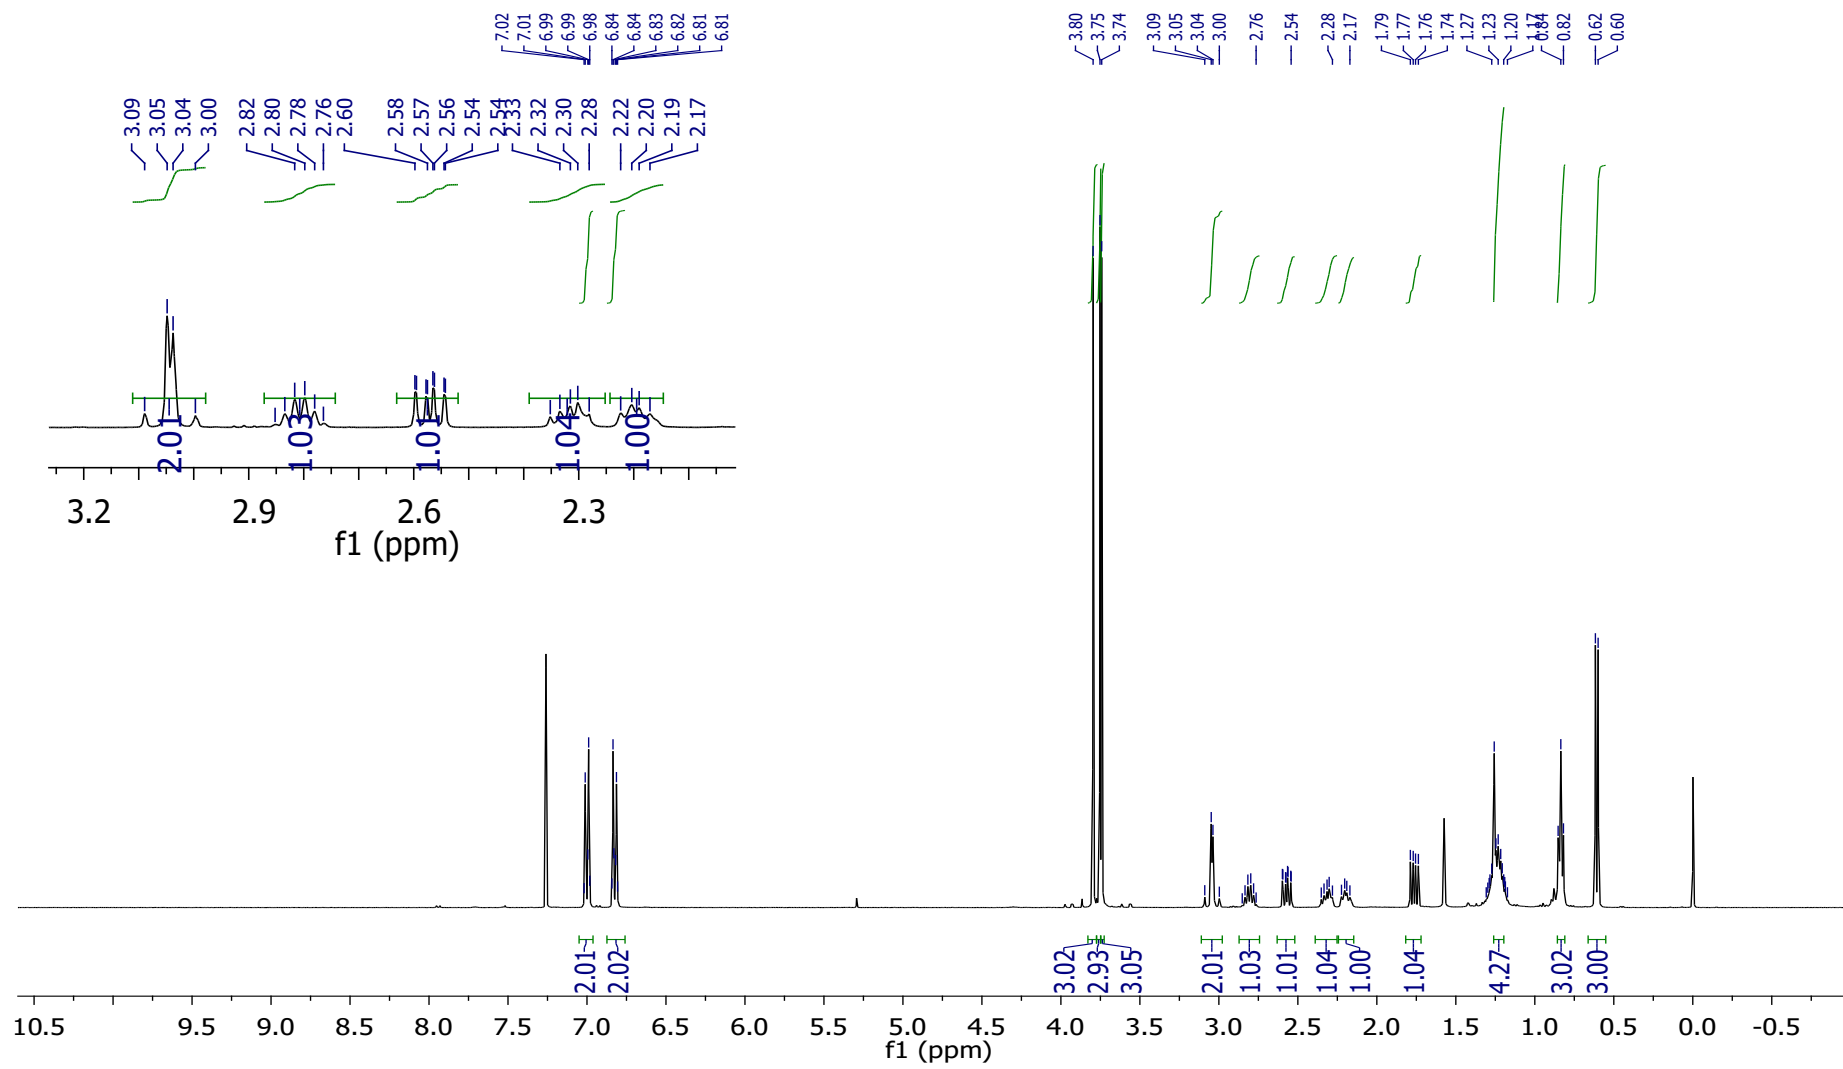

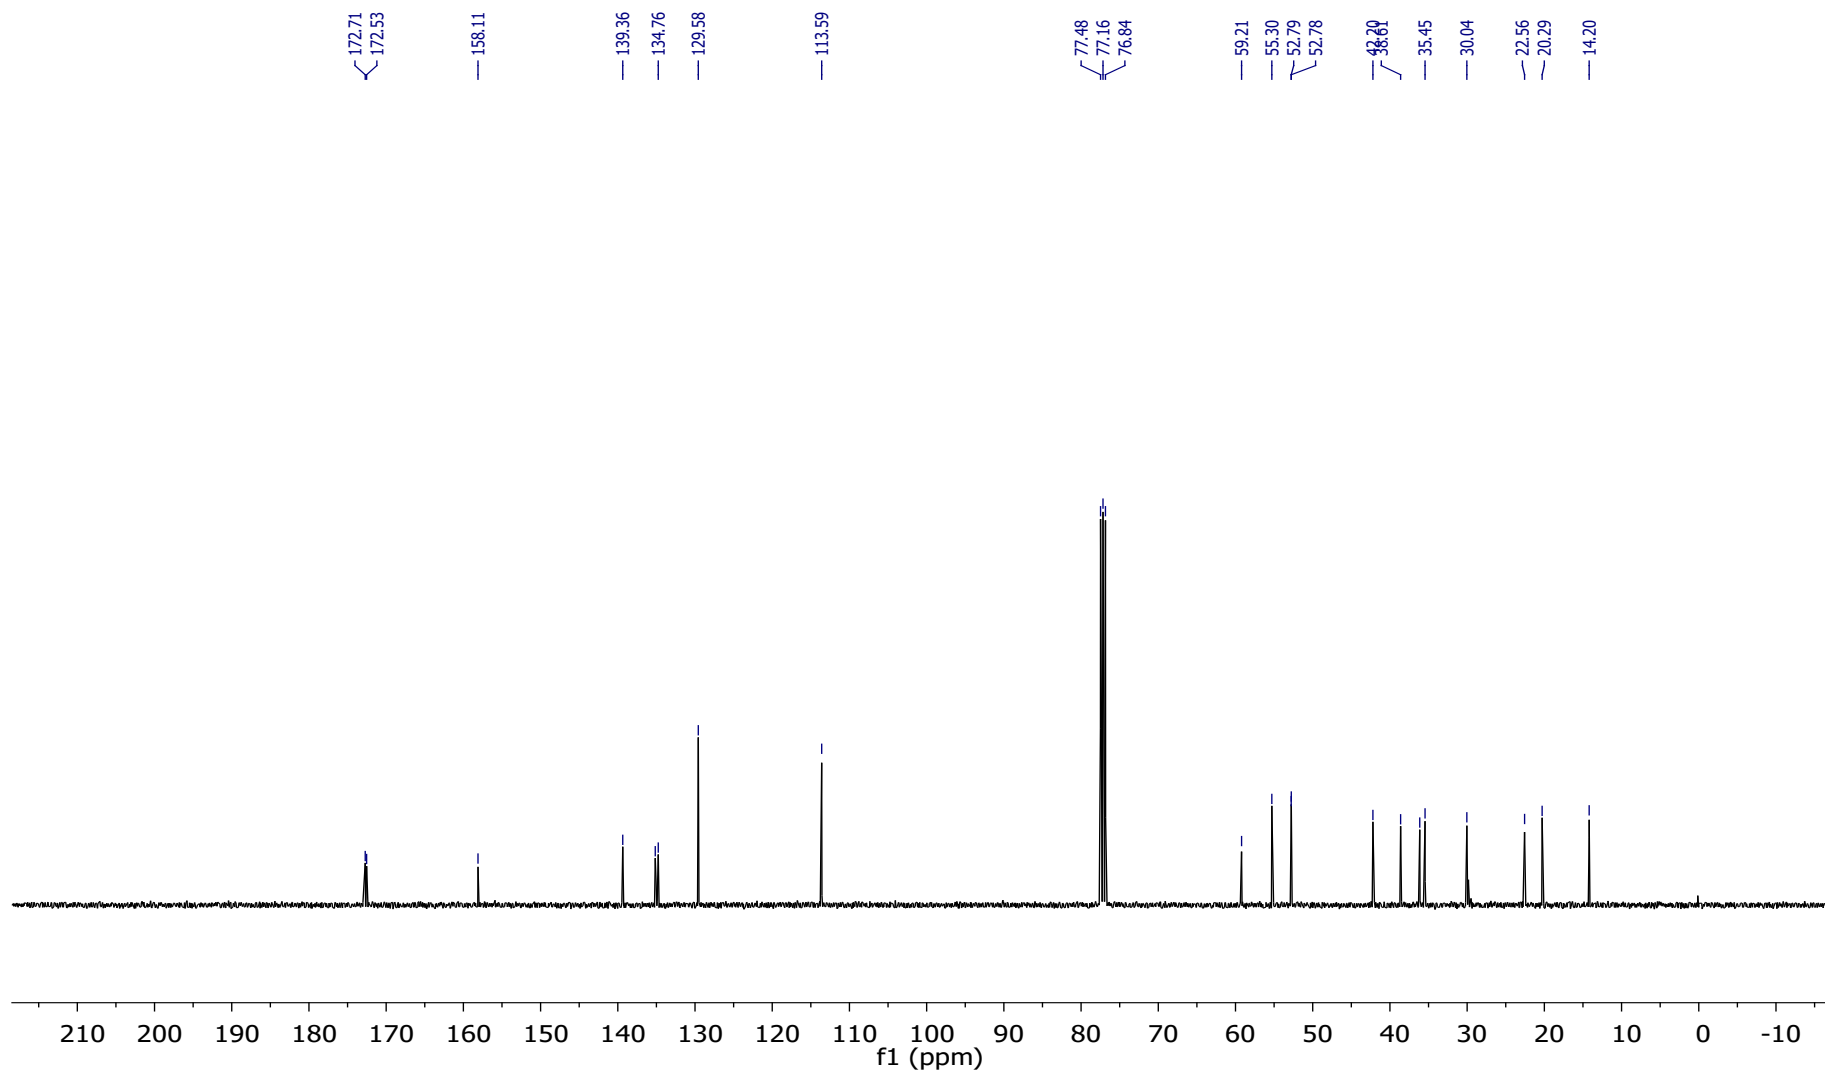



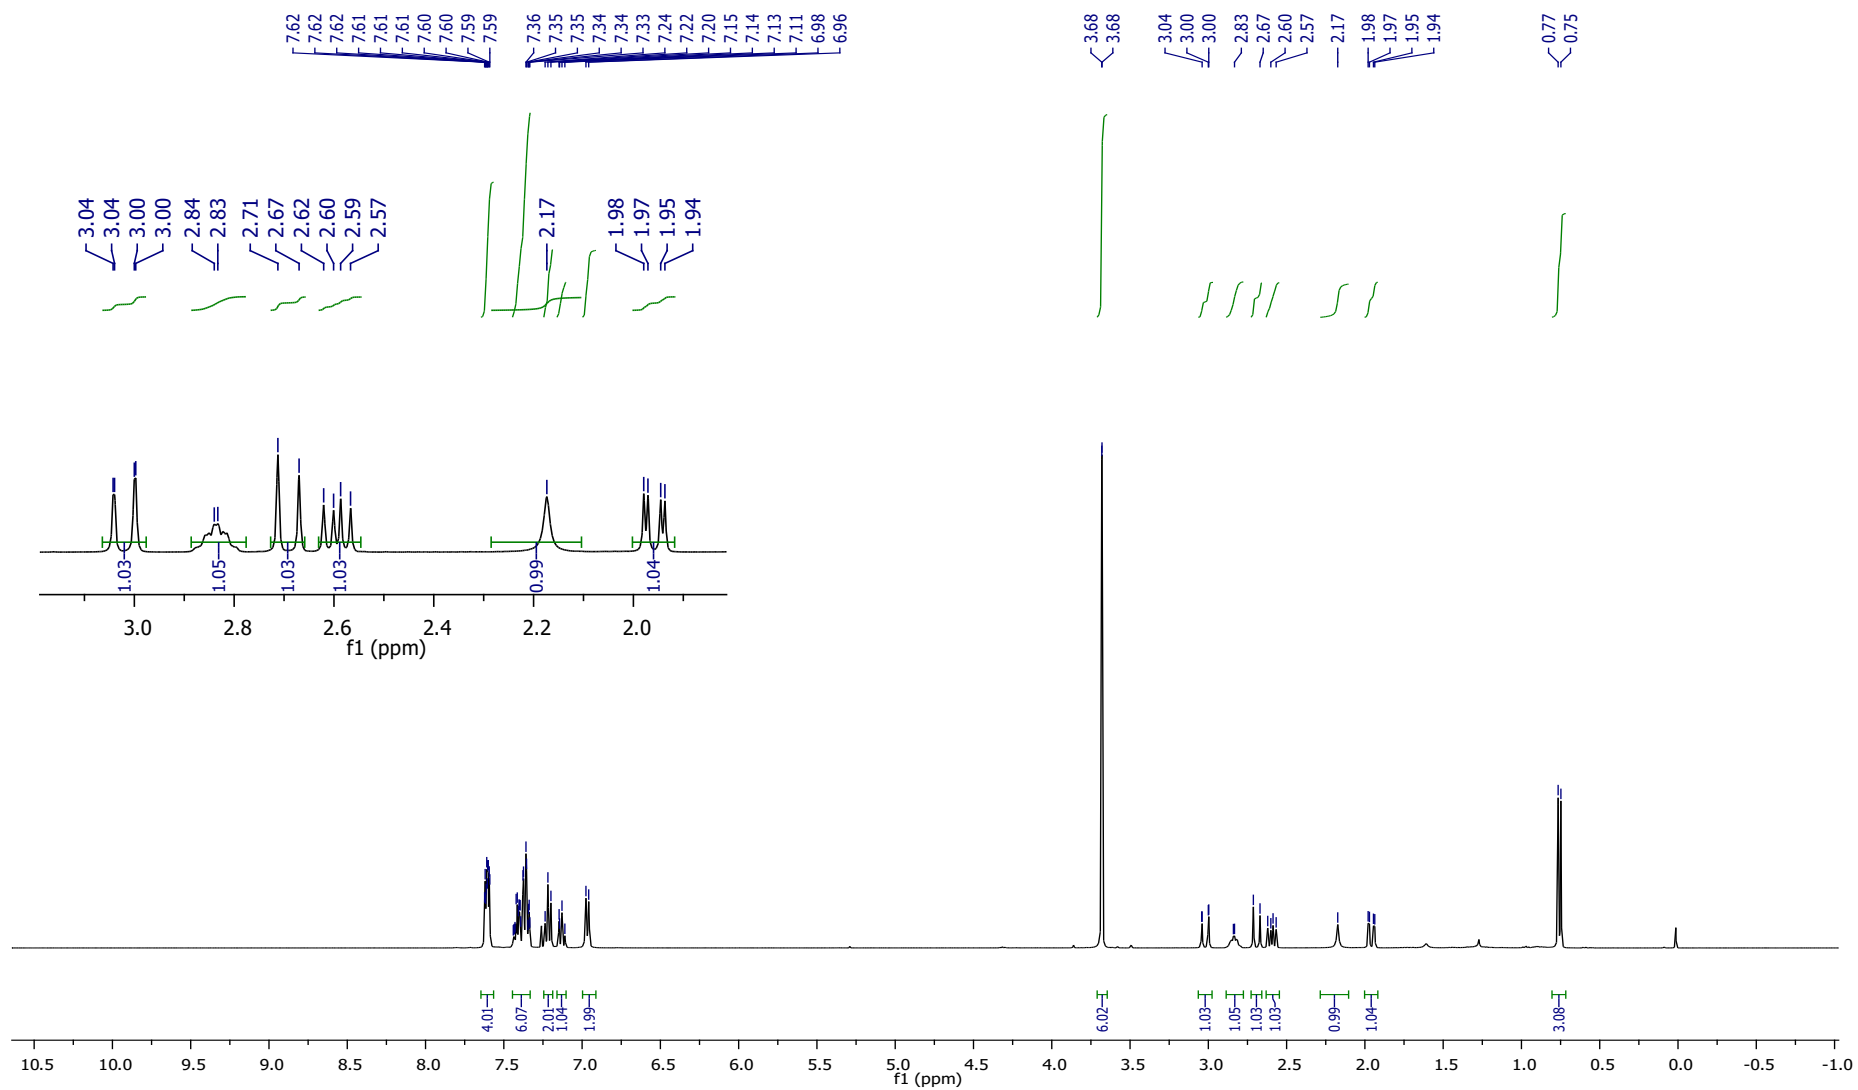

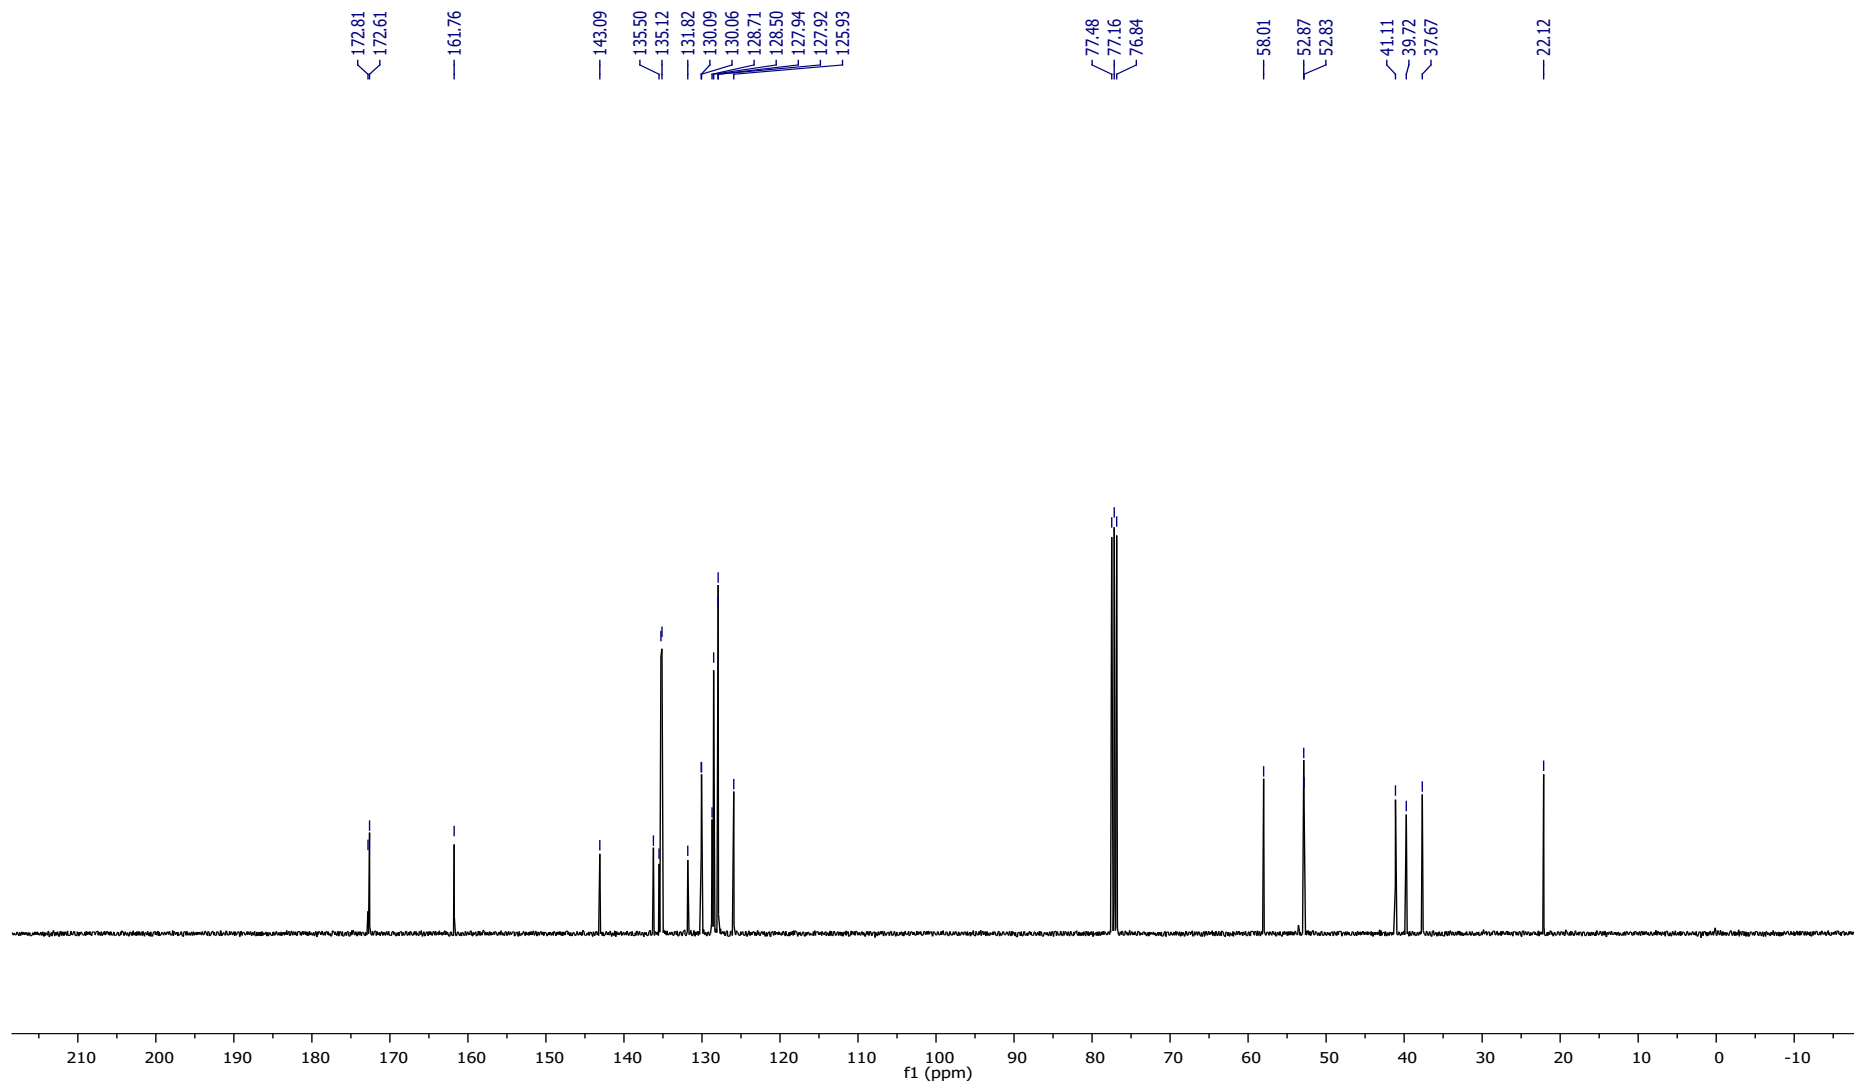

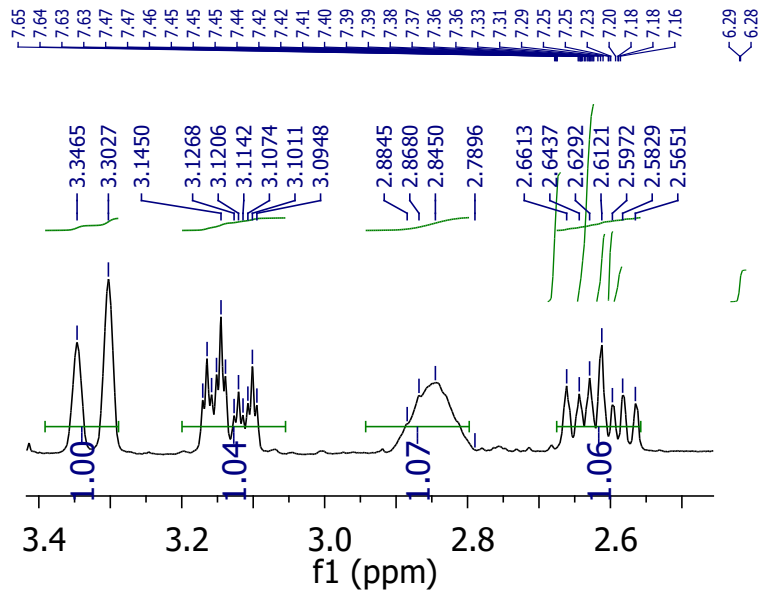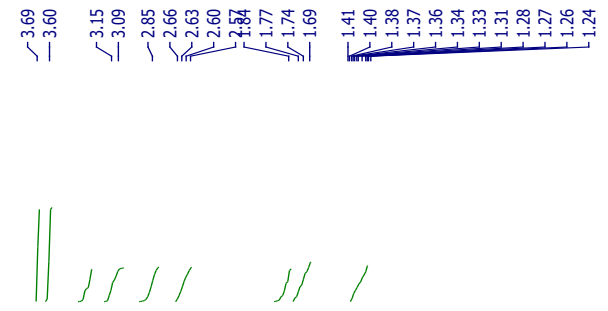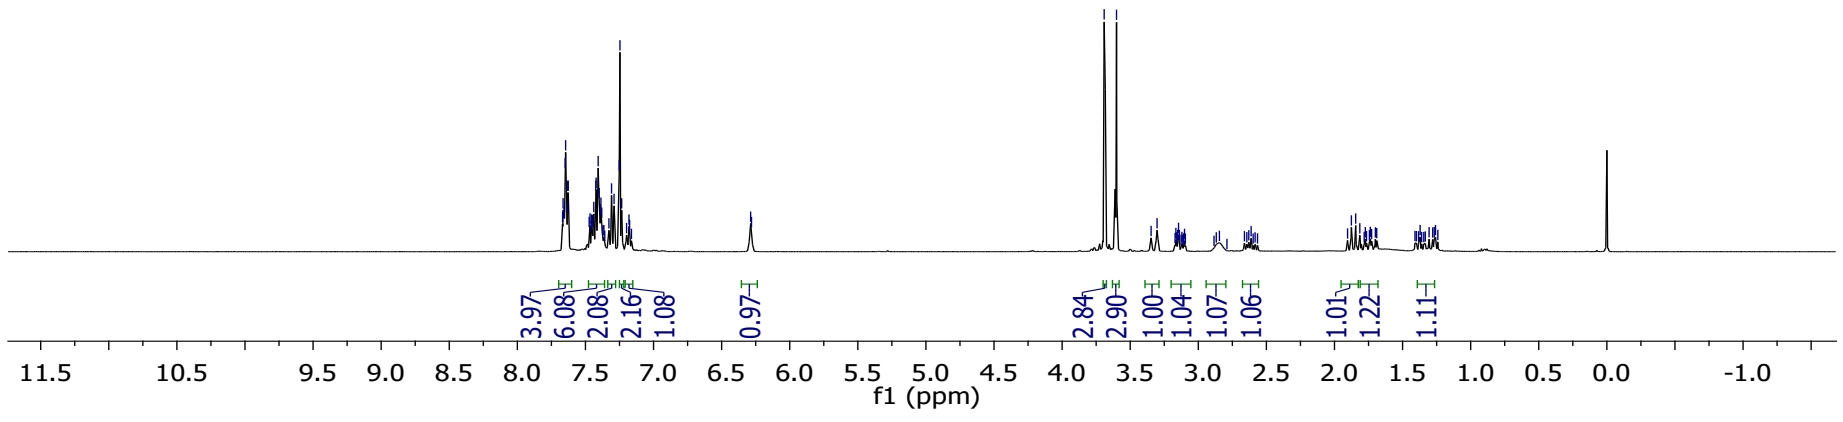

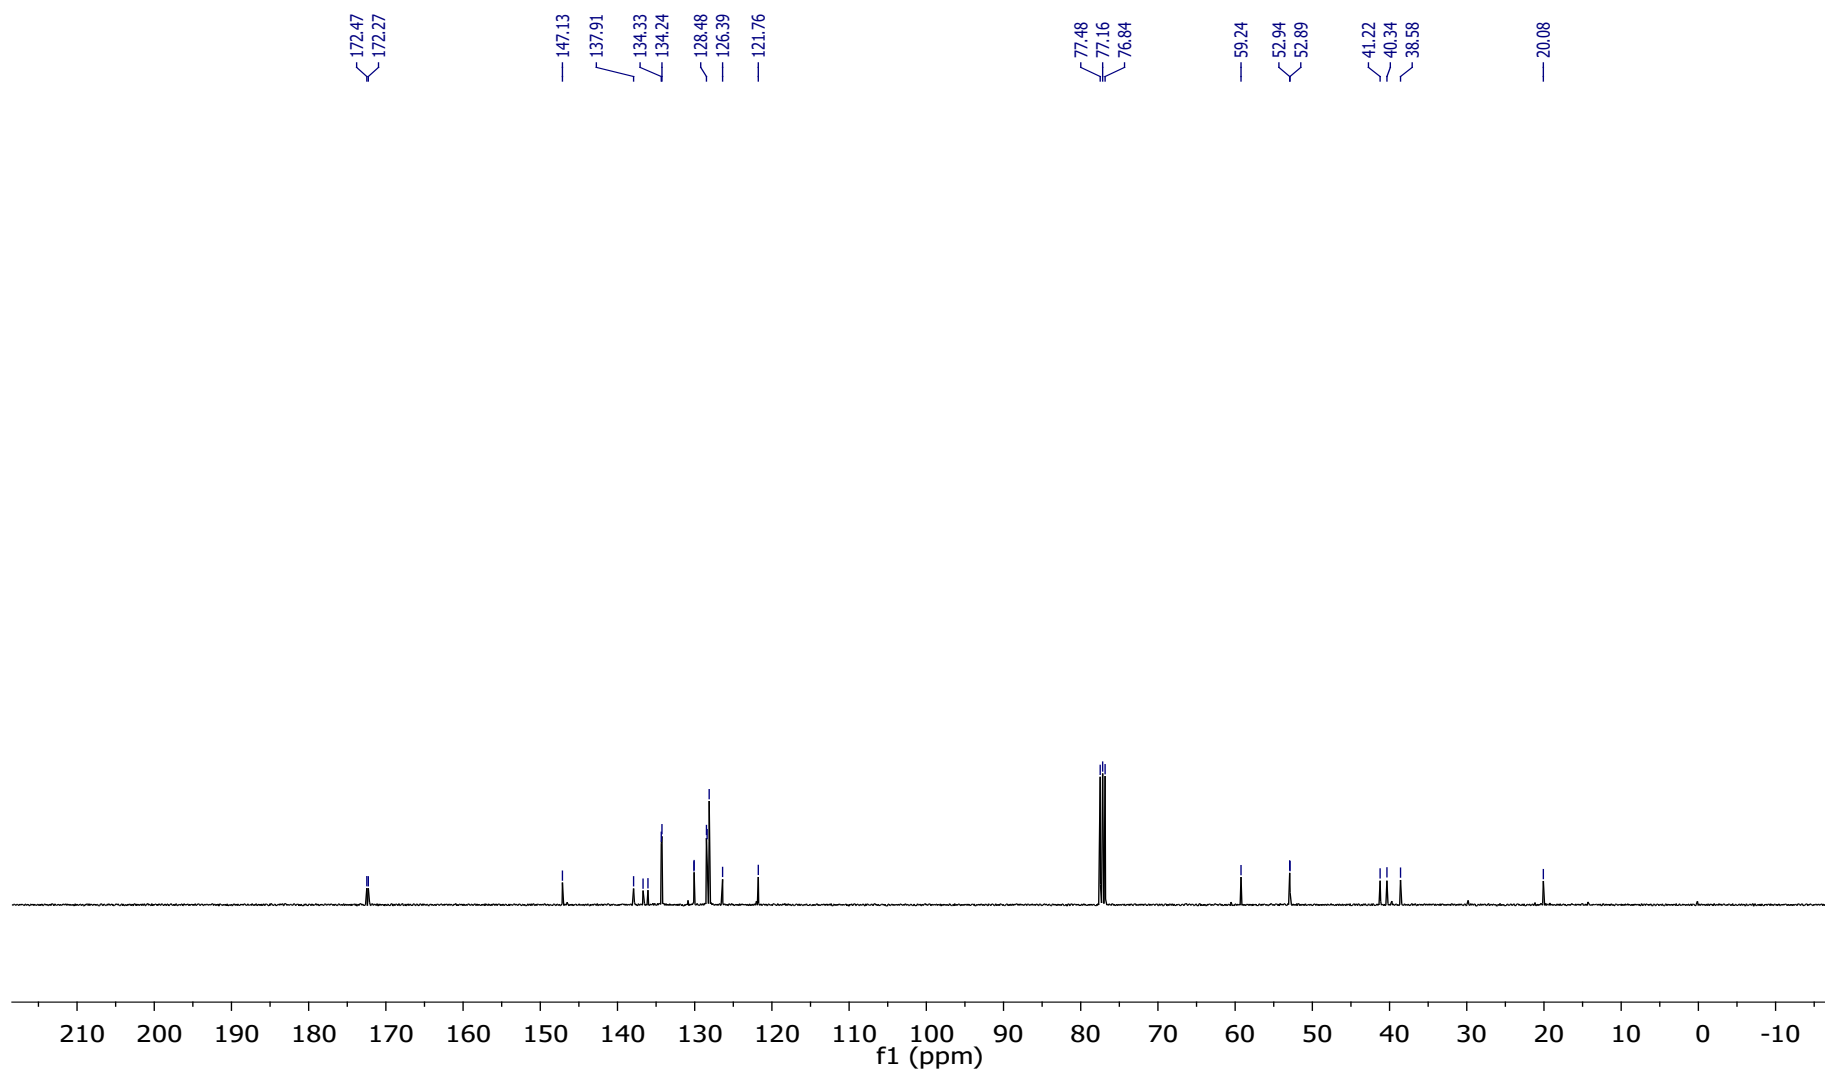

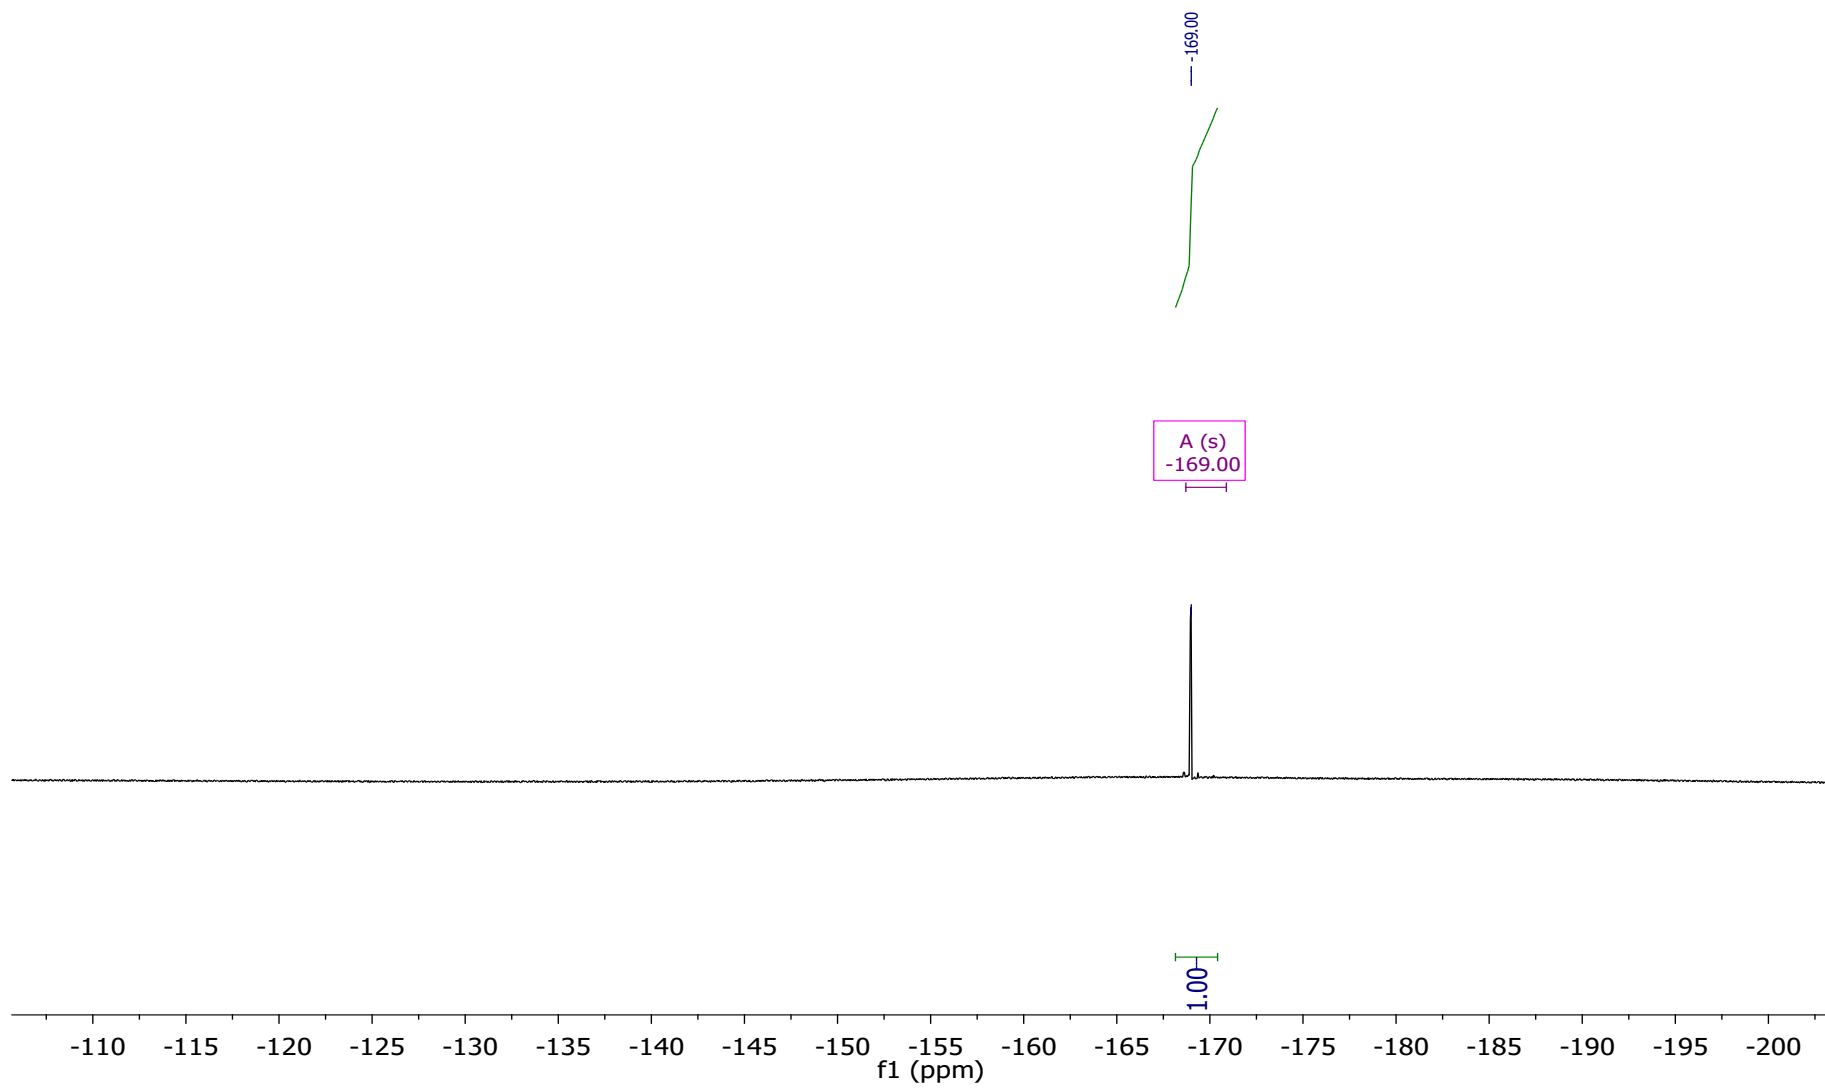

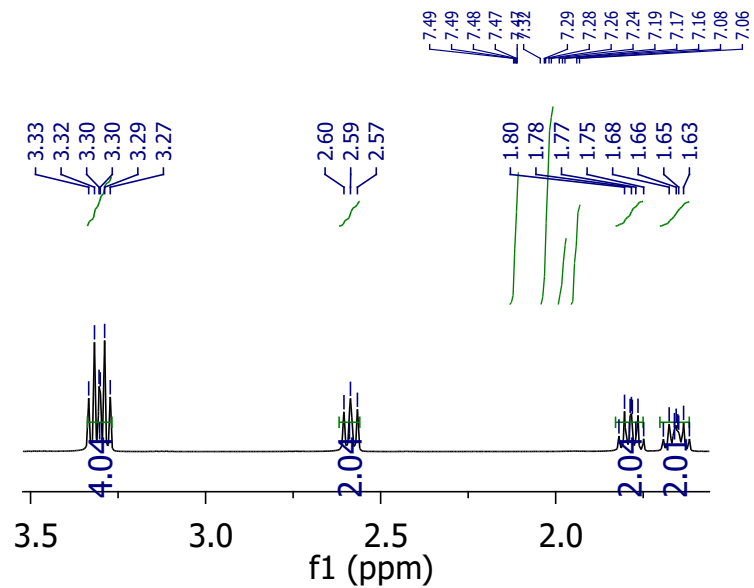

7.49  
7.49  
7.48  
7.47  
7.47  
7.43  
7.29  
7.28  
7.26  
7.24  
7.19  
7.17  
7.16  
7.08  
7.06

4.81  
4.80  
4.79

3.33  
3.32  
3.30  
3.30  
3.29  
3.27  
 2.60  
2.59  
2.57  
 1.78  
1.76  
1.68  
1.65  
1.62  
 1.13  
1.12  
1.11  
1.10  
1.09  
1.09  
1.08

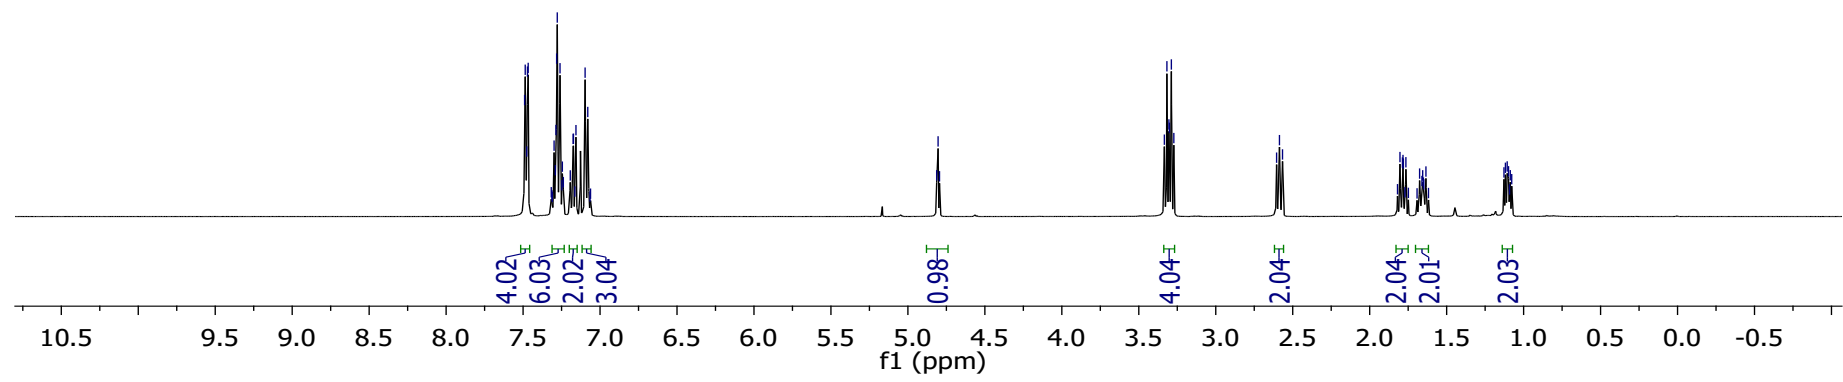

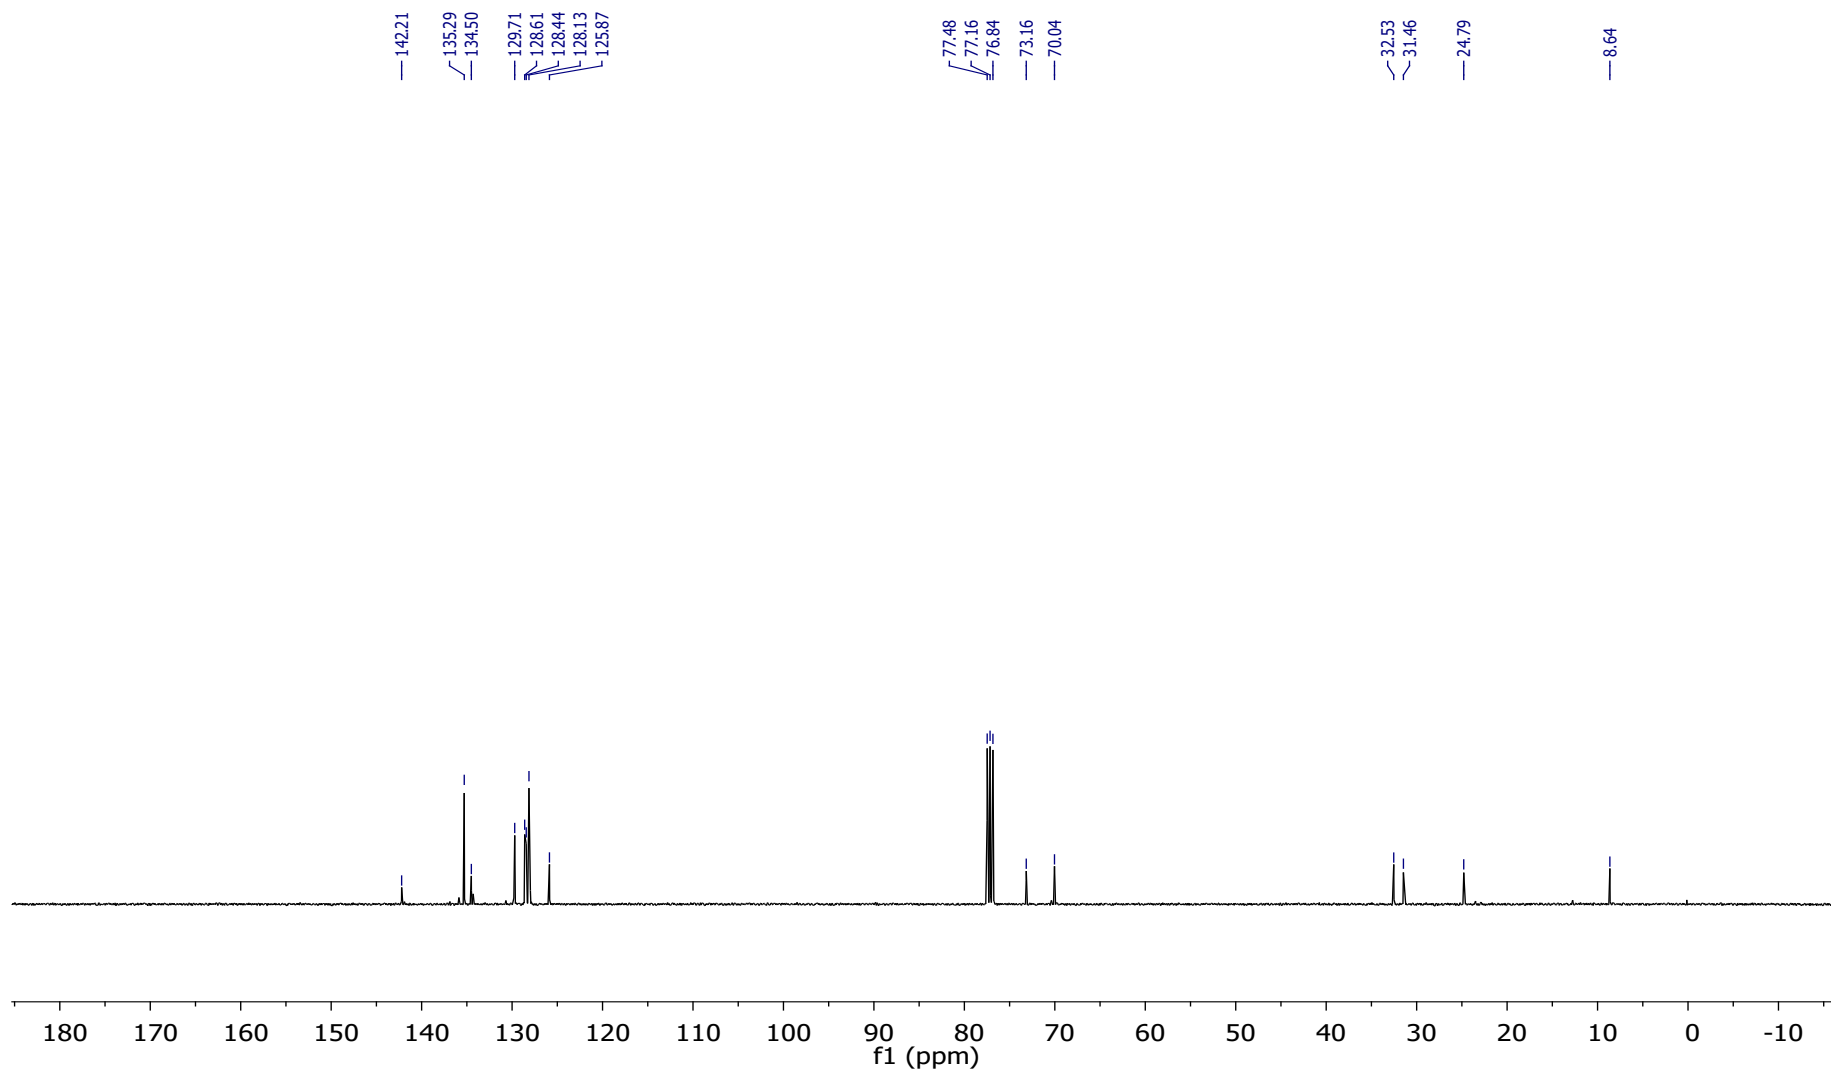

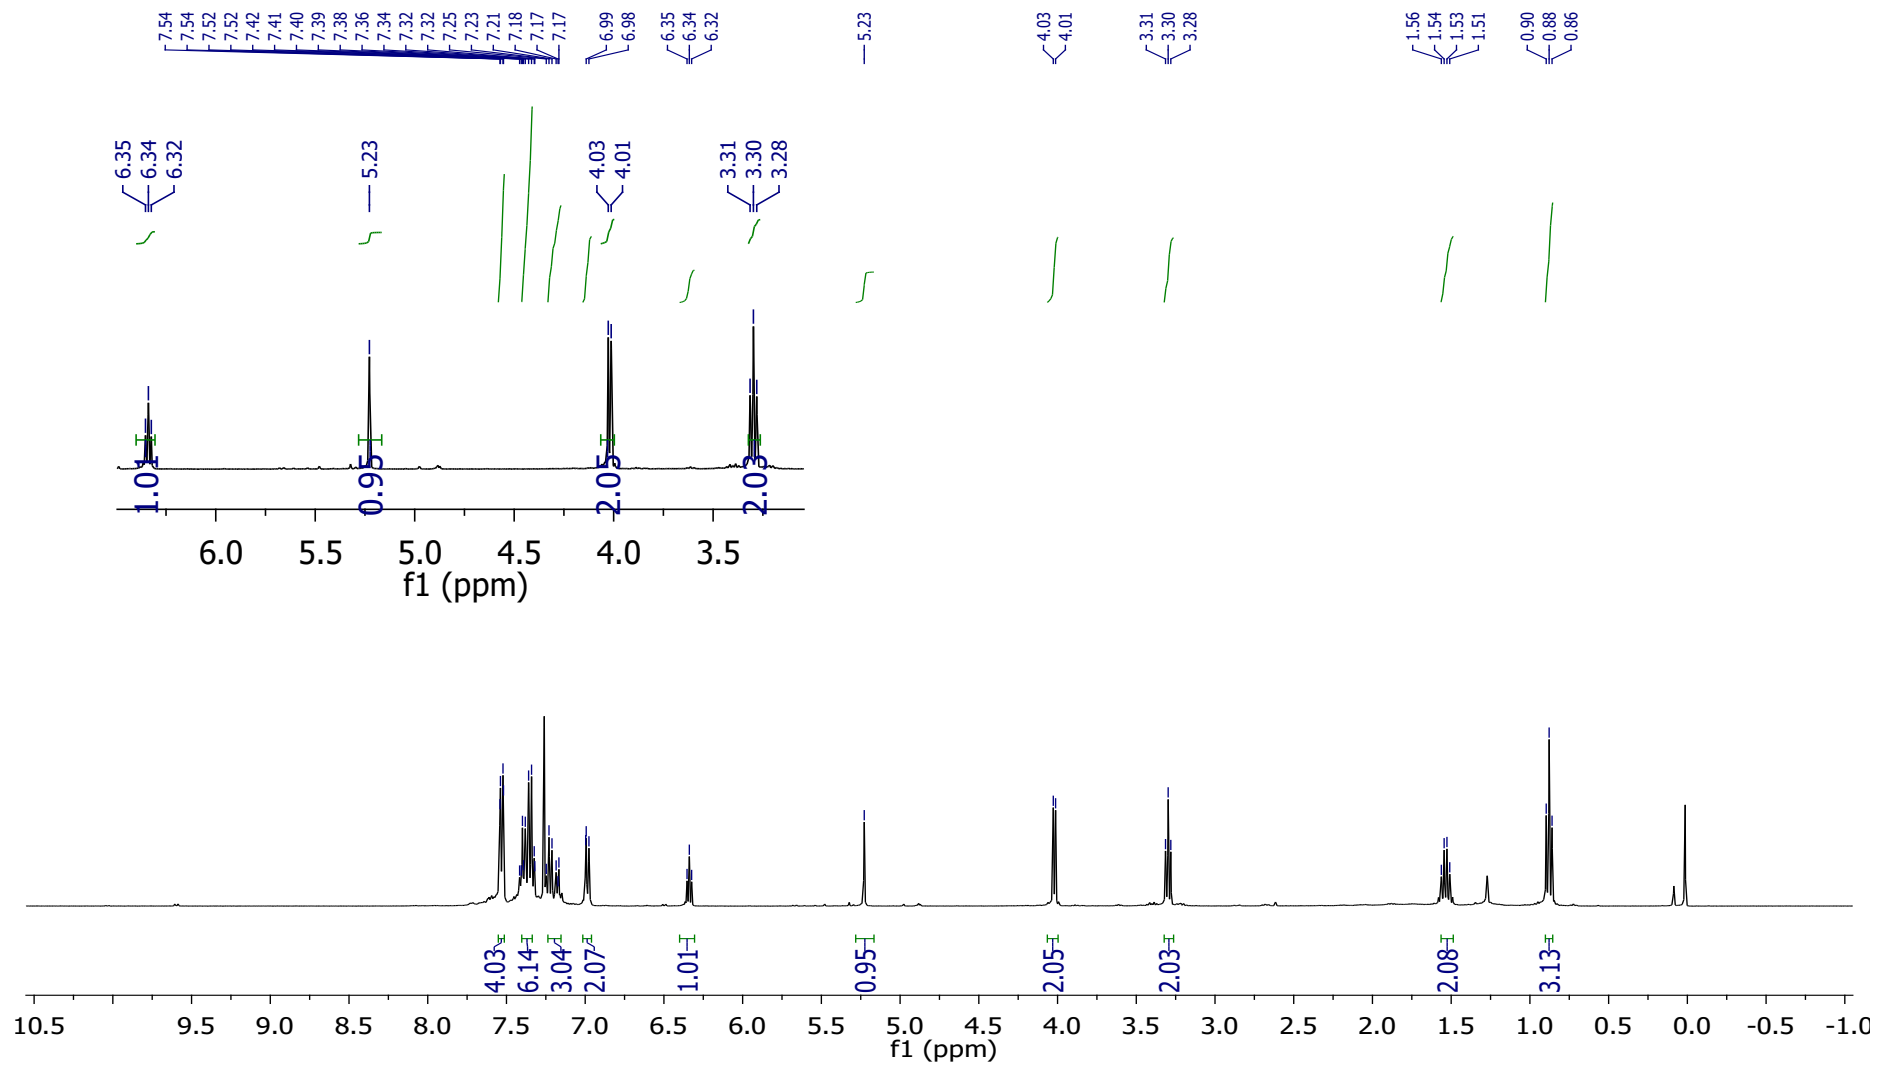



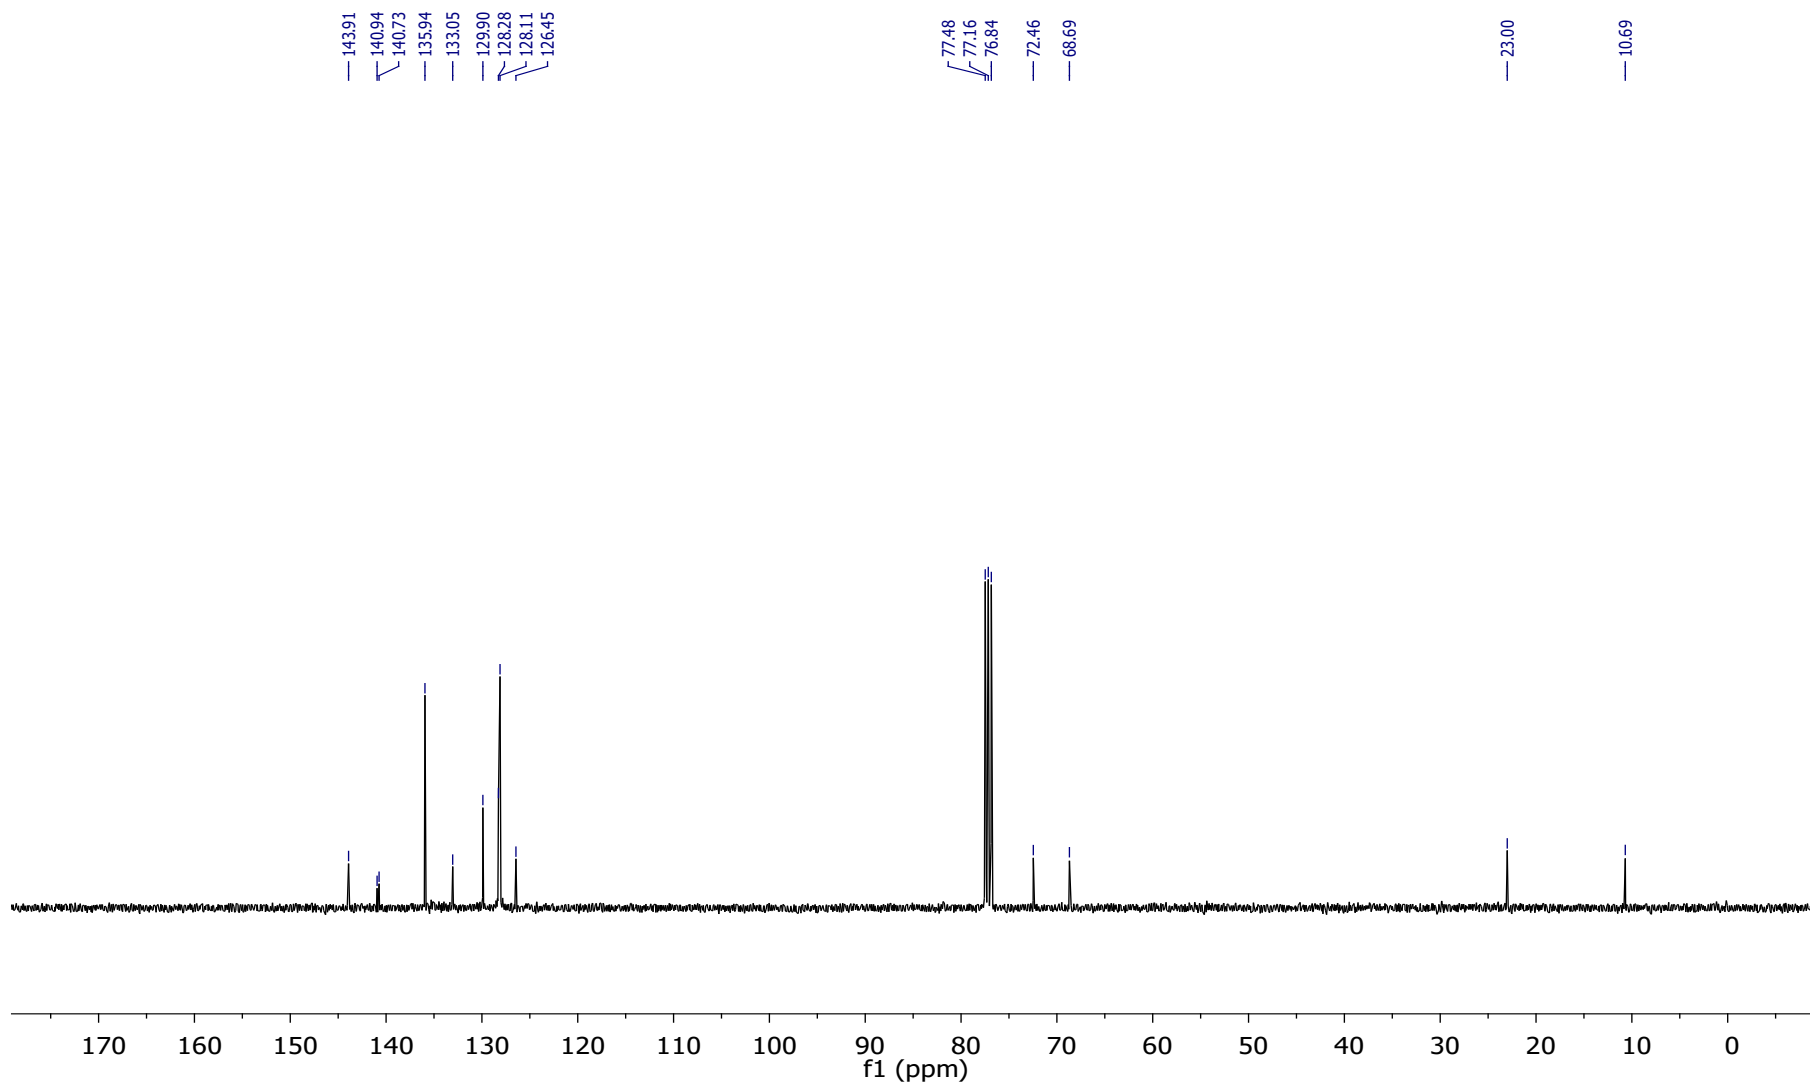

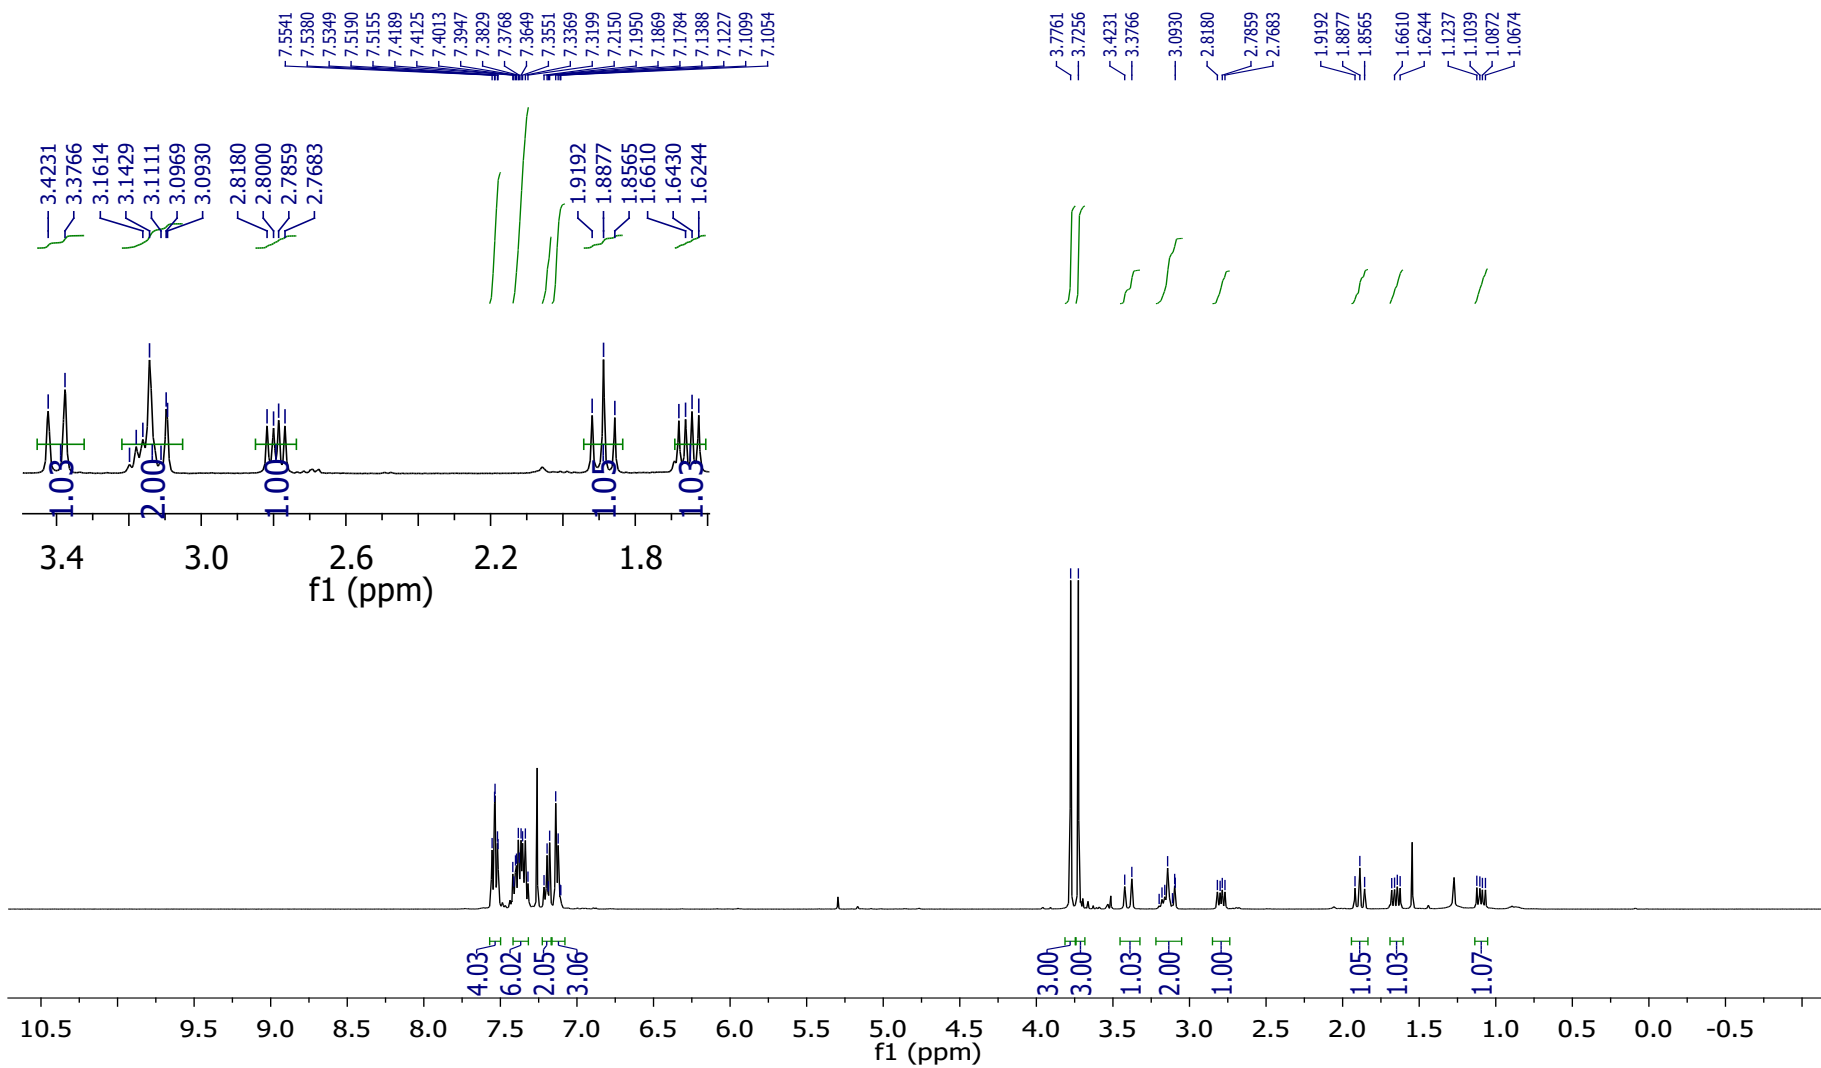

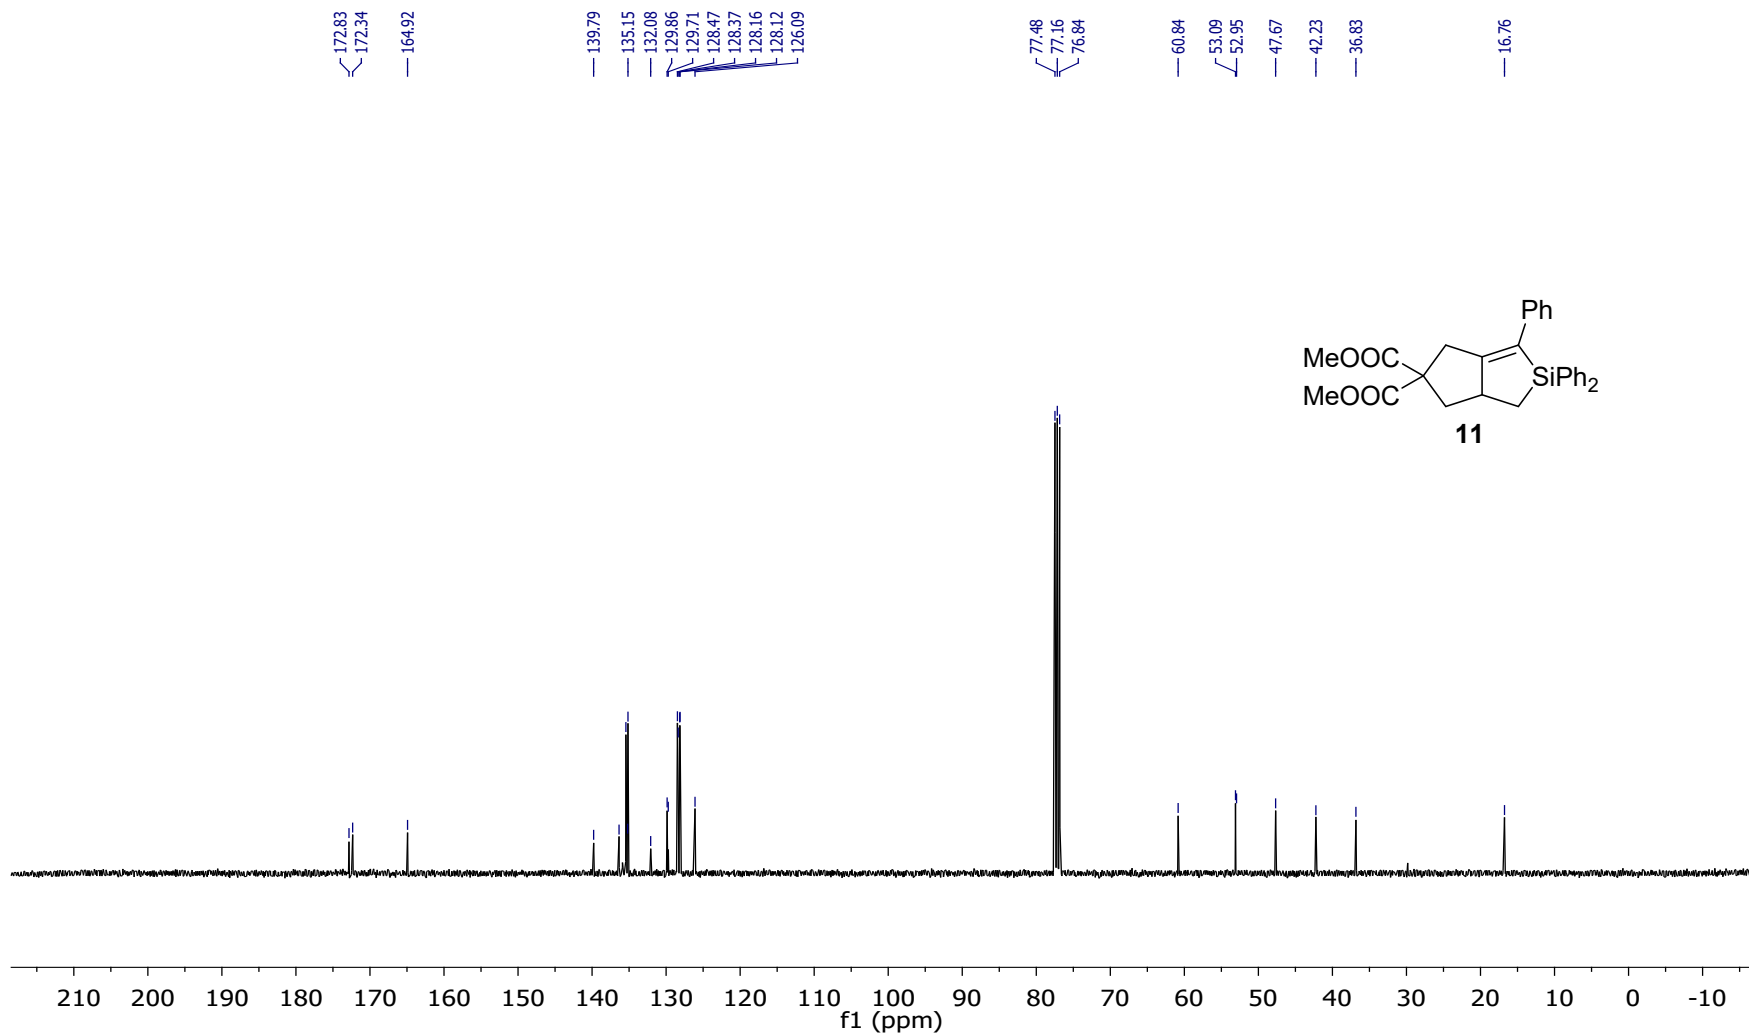

Supplement: d2qo01266a1.pdf [file d2qo01266a1.pdf]
